# Supplementary material
Source: PubMed Central journal article supplement (PMC10350249)
Supplement: NIHMS1910428-supplement-Data_S1.pdf [file NIHMS1910428-supplement-Data_S1.pdf]

HHV6B AN (P52448)

Gene: U70 ; Protein Family: AN

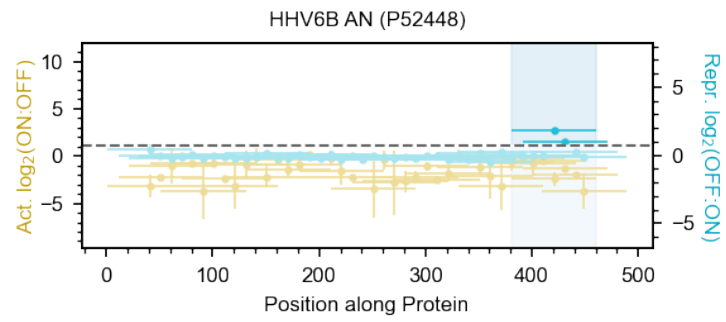

---

Extended repression domain from residues 381 to 470:

INDHSNPEYIESTEVPSVHIVTALFRRRTEEEERSLHLVIDETEIIEEEIPLALIVTPVAPNPEFTCRVITDICNLWENNICKQTSLQVWA

Max tile of repression domain from residues 381 to 460 (estimated 34.9% to 41.3% of cells repressed):

INDHSNPEYIESTEVPSVHIVTALFRRRTEEEERSLHLVIDETEIIEEEIPLALIVTPVAPNPEFTCRVITDICNLWENNI

---

EBV BDLF3 (P03224)

Gene: BDLF3 ; Protein Family: BDLF3

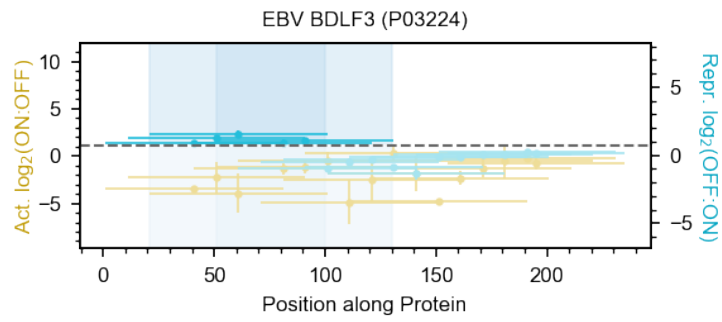

---

Extended repression domain from residues 1 to 100:

MAHARDKAGAVMAMILICETSLIWTSSGSSTASAGNVGTGTTAVTTPSPSASGPSTNQSTLLTTTSAPITTTAILSTNTTTVTFTGTTVTPVPTTSNASTI

Max tile of repression domain from residues 21 to 100 (estimated 24.9% to 39.8% of cells repressed):

SLIWTSSGSSTASAGNVGTGTTAVTTPSPSASGPSTNQSTLLTTTSAPITTTAILSTNTTTVTFTGTTVTPVPTTSNASTI

---

Extended repression domain from residues 41 to 130:

TAVTTPSPSASGPSTNQSTLLTTTSAPITTTAILSTNTTTVTFTGTTVTPVPTTSNASTINVTTKVTAQNITATEAGTGTSTGVTSNVTT

Max tile of repression domain from residues 51 to 130 (estimated 18.3% to 24.4% of cells repressed):

SGPSTNQSTLLTTTSAPITTTAILSTNTTTVTFTGTTVTPVPTTSNASTINVTTKVTAQNITATEAGTGTSTGVTSNVTT

---

EBV BILF2 (P03218)

Gene: BILF2 ; Protein Family: BILF2

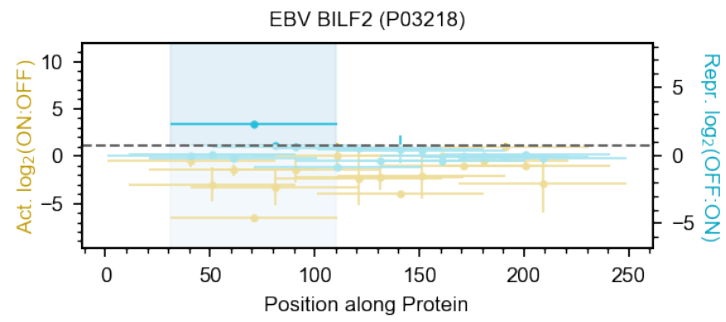

---

Extended repression domain from residues 31 to 120:

HAGARVNLTCVPSNESVSRIELGRGYTPGDGQLPLAVATSNNGTHITNGGYNYSLTLEWVNDSENTSVSLIIPNVTLAHAGYYTCNVTLR

Max tile of repression domain from residues 31 to 110 (estimated 50.3% to 54.2% of cells repressed):

HAGARVNLTCVPSNESVSRIELGRGYTPGDGQLPLAVATSNNGTHITNGGYNYSLTLEWVNDSENTSVSLIIPNVTLAHA

---

EBV BLRF2 (P0C717)

Gene: BLRF2 ; Protein Family: BLRF2

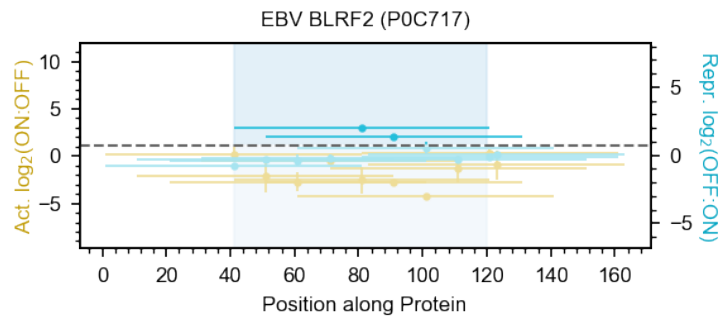

---

Extended repression domain from residues 41 to 130:

LRGGACASSTSVPSAPVPPPEPLTARQREVMITQATGRLASQAMKKIEDKVRKSVDGVTTTRNEMENILQNLTMRIQVSMLGAKGQPSPGE

Max tile of repression domain from residues 41 to 120 (estimated 41.3% to 44.7% of cells repressed):

LRGGACASSTSVPSAPVPPPEPLTARQREVMITQATGRLASQAMKKIEDKVRKSVDGVTTTRNEMENILQNLTMRIQVSML

---

EBV BZLF1 (P03206)

Gene: BZLF1 ; Protein Family: BZLF1

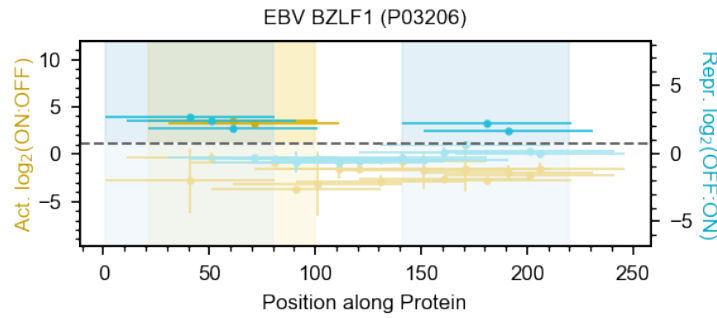

Extended repression domain from residues 1 to 100:

MMDPNSTSEDVKFTPDYQVPFVQAFDQATRKYQDLGGPSQAPLPCVLWVLPPEPLPQGQLTAYHVSTAPTGSWFSAPQPAPENAYQAYAAPQLFPVSDI

Max tile of repression domain from residues 1 to 80 (estimated 60.3% to 62.5% of cells repressed):

MMDPNSTSEDVKFTPDYQVPFVQAFDQATRKYQDLGGPSQAPLPCVLWVLPPEPLPQGQLTAYHVSTAPTGSWFSAPQP

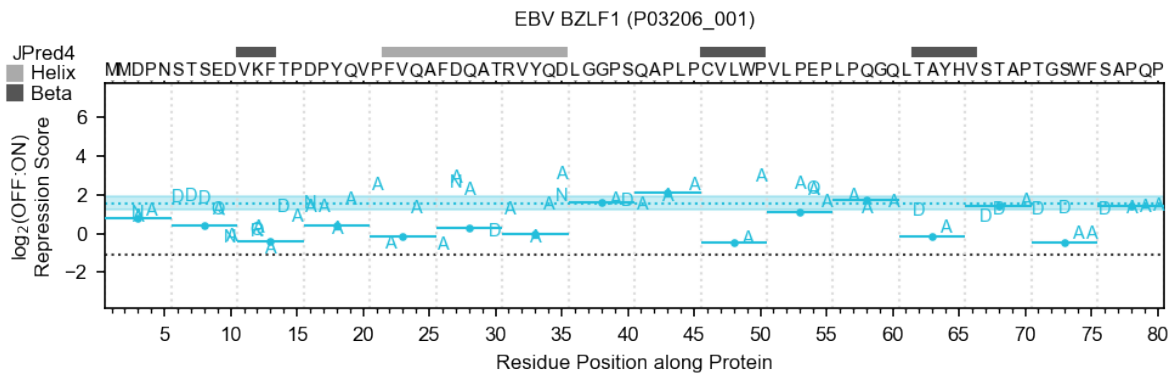

| Motif Name | Motif Start | Motif End | Motif Sequence | Overlaps Essential? | Essential Start | Essential End | Essential Sequence |
|------------|-------------|-----------|----------------|---------------------|-----------------|---------------|--------------------|
| SUMO_rev   | 6           | 14        | STSEDVKFT      | No                  | -               | -             |                    |

Extended activation domain from residues 21 to 110:

PFVQAFDQATRKYQDLGGPSQAPLPCVLWVLPPEPLPQGQLTAYHVSTAPTGSWFSAPQPAPENAYQAYAAPQLFPVSDITQNNQTNQAG

Max tile of activation domain from residues 21 to 100 (estimated 10.6% to 13.5% of cells activated):

PFVQAFDQATRKYQDLGGPSQAPLPCVLWVLPPEPLPQGQLTAYHVSTAPTGSWFSAPQPAPENAYQAYAAPQLFPVSDI

Extended repression domain from residues 141 to 230:

LADIGVPQPAPVAAPARRTRKQPQESLEECDSELEIKRYKNRVASRKCRKFKQLLQHYREVAAAKSSENDRLRLLKQMCPSLDVS

Max tile of repression domain from residues 141 to 220 (estimated 42.3% to 55.6% of cells repressed):

LADIGVPQPAPVAAPARRTRKQPQESLEECDSELEIKRYKNRVASRKCRKFKQLLQHYREVAAAKSSENDRLRLLKQ

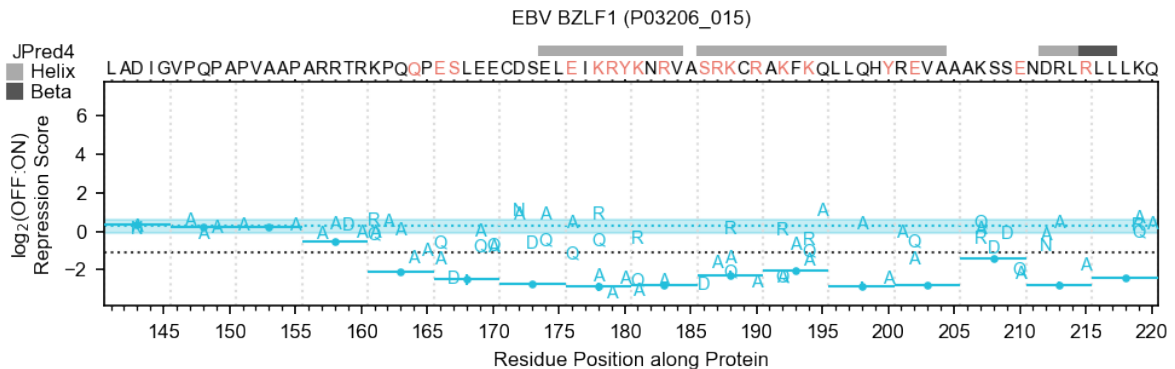

Herpesvirus Tiling and Perturbation Screen Data from Ludwig, C.H. et al. 2023

| Motif Name    | Motif Start | Motif End | Motif Sequence | Overlaps Essential? | Essential Start | Essential End | Essential Sequence                                                  |
|---------------|-------------|-----------|----------------|---------------------|-----------------|---------------|---------------------------------------------------------------------|
| CtBP_expanded | 165         | 169       | PESLE          | Yes                 | 161             | 220           | KPQQPESLEECDSELEIKRYK<br>NRVASRKCRAKFKQLLQHYP<br>EVAAAKSSENDRLRLLKQ |
| flexi_NRBOX   | 192         | 198       | KFKQLLQ        | Yes                 | 161             | 220           | KPQQPESLEECDSELEIKRYK<br>NRVASRKCRAKFKQLLQHYP<br>EVAAAKSSENDRLRLLKQ |
| LIG_NRBOX     | 213         | 219       | RLRLLK         | Yes                 | 161             | 220           | KPQQPESLEECDSELEIKRYK<br>NRVASRKCRAKFKQLLQHYP<br>EVAAAKSSENDRLRLLKQ |

HCMV CEP2 (P16800)

Gene: UL94 ; Protein Family: CEP2

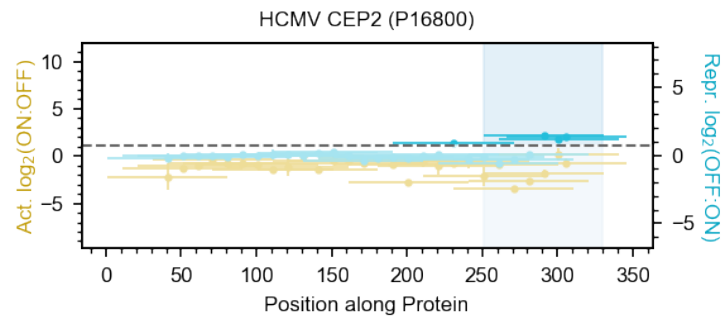

---

Extended repression domain from residues 251 to 345:

LCYVPCGPMTQSLIHNEEPATFFCESDDAKYLCAVGSKTAAQVTLGDGLDYHIGVKDSEGRWLPVKTDVWDLVKVEEPVSRMIVCSCPVLKNLVH

Max tile of repression domain from residues 251 to 330 (estimated 26.6% to 30.5% of cells repressed):

LCYVPCGPMTQSLIHNEEPATFFCESDDAKYLCAVGSKTAAQVTLGDGLDYHIGVKDSEGRWLPVKTDVWDLVKVEEPVS

---

HSV2 CEP2 (P89439)

Gene: UL16 ; Protein Family: CEP2

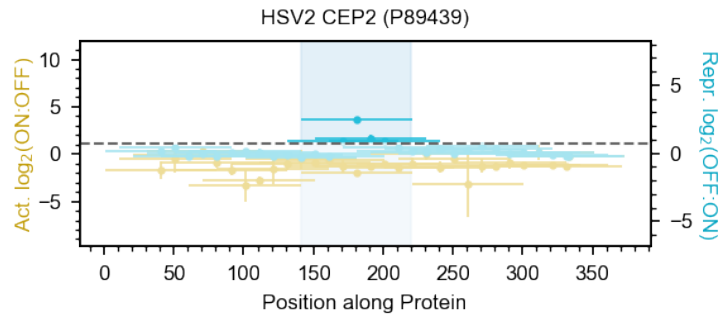

Extended repression domain from residues 131 to 240:

VTHPRTPLLCTLAFGHLEAASPPEETPDPAAEQLADEPVVAHELDGAYLVPTDTAPESGACCALGPGAWWHLPGGRIYCWAMDDDLGSLCPPGSRARHLGWLLSRITDPPG

Max tile of repression domain from residues 141 to 220 (estimated 56.5% to 56.7% of cells repressed):

TLAFGHLEAASPPEETPDPAAEQLADEPVVAHELDGAYLVPTDTAPESGACCALGPGAWWHLPGGRIYCWAMDDDLGSLCP

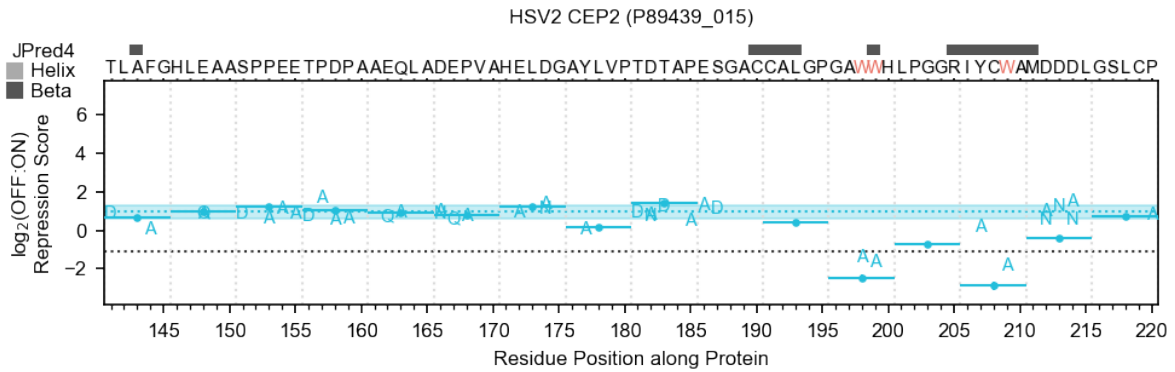

| Motif Name | Motif Start | Motif End | Motif Sequence | Overlaps Essential? | Essential Start | Essential End | Essential Sequence |
|------------|-------------|-----------|----------------|---------------------|-----------------|---------------|--------------------|
| Sin3A_SID  | 160         | 164       | AAEQL          | No                  | -               | -             |                    |
|            | -           | -         |                | No                  | 196             | 200           | GAWWH              |
|            | -           | -         |                | No                  | 206             | 210           | IYCWA              |



HCMV CTNP (P16793)

Gene: UL52 ; Protein Family: CTNP

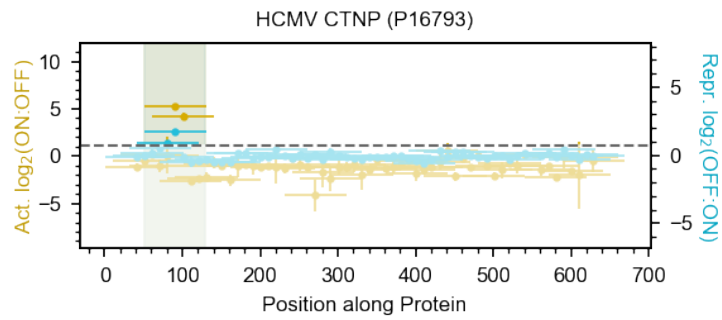

---

Extended repression domain from residues 41 to 130:

LCSPQRQAVSRYSGWSTEYTWHSDDLTELLWHAHPRQVPMDEALAAAAAASYQVNPQH PANRYRH YEFQTL SLGTSEVDELLNCCA EET

Max tile of repression domain from residues 51 to 130 (estimated 35.3% to 39.0% of cells repressed):

RYSGWSTEYTWHSDDLTELLWHAHPRQVPMDEALAAAAAASYQVNPQH PANRYRH YEFQTL SLGTSEVDELLNCCA EET

---

Extended activation domain from residues 51 to 140:

RYSGWSTEYTWHSDDLTELLWHAHPRQVPMDEALAAAAAASYQVNPQH PANRYRH YEFQTL SLGTSEVDELLNCCA EETTCGGTQSTVL

Max tile of activation domain from residues 51 to 130 (estimated 38.8% to 41.5% of cells activated):

RYSGWSTEYTWHSDDLTELLWHAHPRQVPMDEALAAAAAASYQVNPQH PANRYRH YEFQTL SLGTSEVDELLNCCA EET

---

HHV7 CTNP (P52464)

Gene: U36 ; Protein Family: CTNP

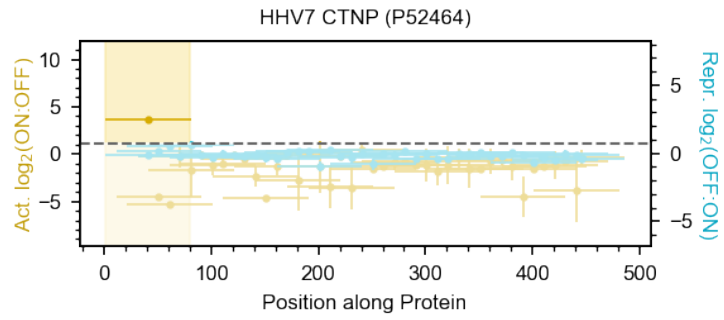

---

Extended activation domain from residues 1 to 80:

MAYKGWNSDSFSMNSSELFNEILLYAHL DSSGIDSDDLNTNPNTLENEINSVEKTLNIEELKKITTALNIDNRCNICSIIIN

Max tile of activation domain from residues 1 to 80 (estimated 11.4% to 15.3% of cells activated):

MAYKGWNSDSFSMNSSELFNEILLYAHL DSSGIDSDDLNTNPNTLENEINSVEKTLNIEELKKITTALNIDNRCNICSIIIN

---

VZV CTNP (P09282)

Gene: ORF26 ; Protein Family: CTNP

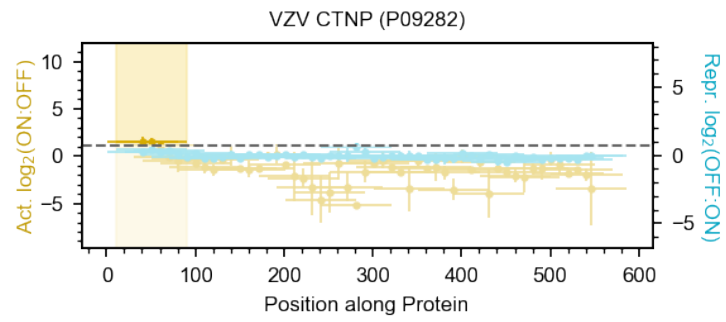

---

Extended activation domain from residues 1 to 100:

MDRVESEEPMDGFESPVFSENTSSNSGWCSDAFSDSYIAYNPALLKNDLLFSELLFASHLINVPRAIENNVTYEASSAVGVDNEMTSSTTEFIEEIGDV

Max tile of activation domain from residues 11 to 90 (estimated 2.6% to 3.9% of cells activated):

DGFESPVFSENTSSNSGWCSDAFSDSYIAYNPALLKNDLLFSELLFASHLINVPRAIENNVTYEASSAVGVDNEMTSST

---

EBV CVC1 (P03222)

Gene: BGLF1 ; Protein Family: CVC1

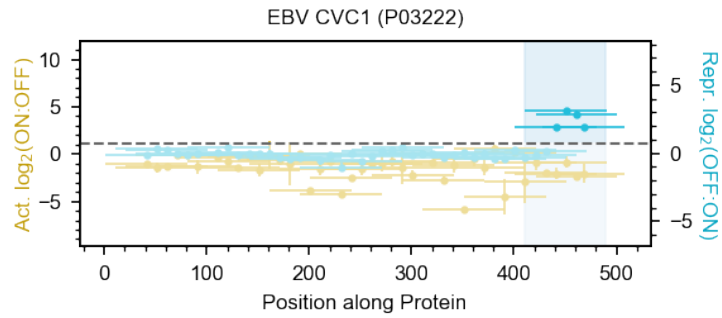

Extended repression domain from residues 401 to 507:

SCWVKATISNAPKTPDAACLWIDSHPLYEEGASAWGKVIDSRPPGGLVGAASQLVALGTDGHCVHLATTS DGQAFLVLPGGFVIKQQLALTPEERGYILARHGIRREQ

Max tile of repression domain from residues 411 to 490 (estimated 73.3% to 73.7% of cells repressed):

APKTPDAACLWIDSHPLYEEGASAWGKVIDSRPPGGLVGAASQLVALGTDGHCVHLATTS DGQAFLVLPGGFVIKQQLALT

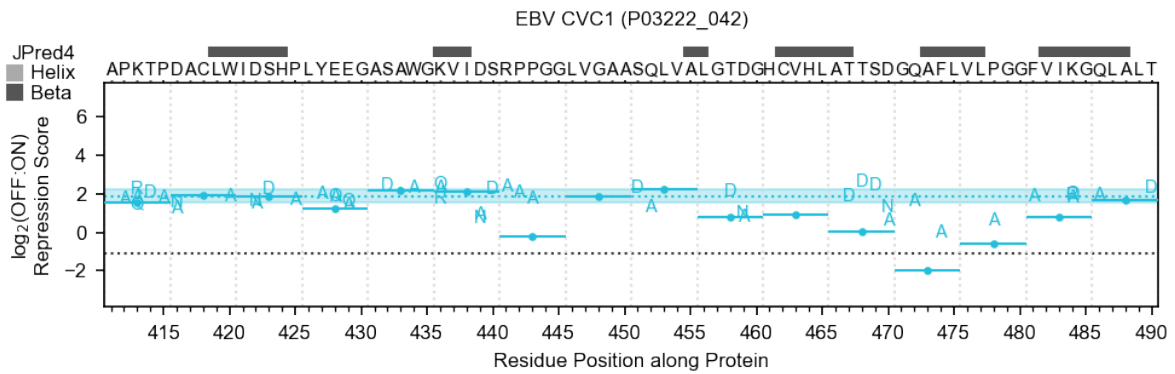

| Motif Name   | Motif Start | Motif End | Motif Sequence | Overlaps Essential? | Essential Start | Essential End | Essential Sequence |
|--------------|-------------|-----------|----------------|---------------------|-----------------|---------------|--------------------|
| flexi_NRBOX  | 433         | 439       | AWGKVID        | No                  | -               | -             |                    |
| Sin3A_SID    | 449         | 453       | AASQL          | No                  | -               | -             |                    |
| SUMO_SIM_par | 451         | 459       | SQLVALGTD      | No                  | -               | -             |                    |
|              | -           | -         |                | No                  | 471             | 475           | GQAFL              |

HCMV CVC1 (P16799)

Gene: UL93 ; Protein Family: CVC1

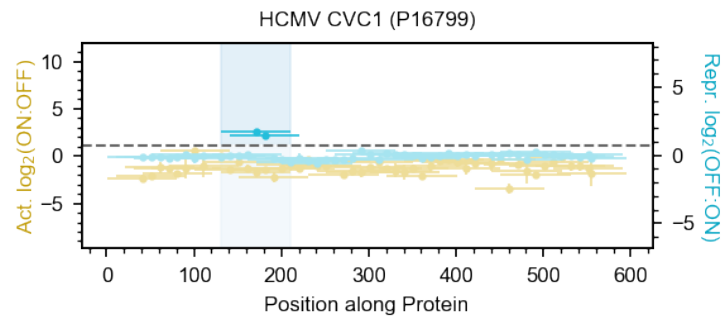

---

Extended repression domain from residues 131 to 220:

TLGLRCPDNRLSGAQLHLRLVWPDGSYRDWEFLARDLLREEMEANKRDRQHQLATTTNHRRRGGLRNNLDNGSDRRRLPEAAVASLETAV

Max tile of repression domain from residues 131 to 210 (estimated 36.4% to 37.4% of cells repressed):

TLGLRCPDNRLSGAQLHLRLVWPDGSYRDWEFLARDLLREEMEANKRDRQHQLATTTNHRRRGGLRNNLDNGSDRRRLPE

---

HSV1 CVC1 (P10201)

Gene: UL17 ; Protein Family: CVC1

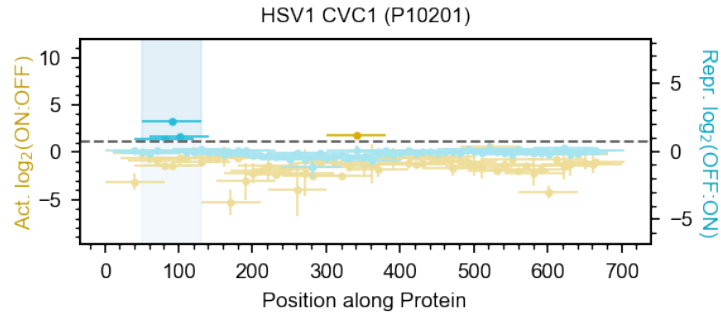

Extended repression domain from residues 41 to 140:

AALMRGRPGLGTAANFQVEIQTRAHATGDCTPWCTAFAAYVPADAVGELLAPVVPVPAHPGLLPRASSAGGLFVSLPVVCDAAQGVYDPYAVAALRLAWGSGA

Max tile of repression domain from residues 51 to 130 (estimated 48.4% to 49.7% of cells repressed):

GTAANFQVEIQTRAHATGDCTPWCTAFAAYVPADAVGELLAPVVPVPAHPGLLPRASSAGGLFVSLPVVCDAAQGVYDPYAVA

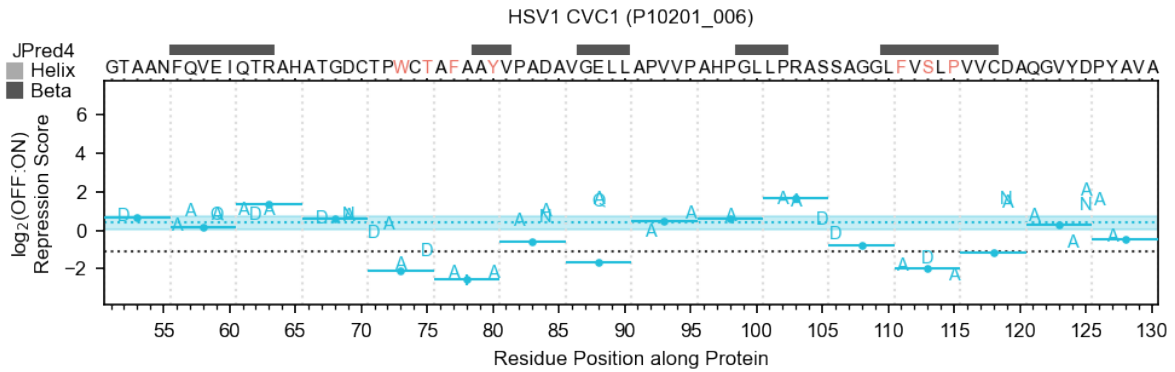

| Motif Name  | Motif Start | Motif End | Motif Sequence | Overlaps Essential? | Essential Start | Essential End | Essential Sequence |
|-------------|-------------|-----------|----------------|---------------------|-----------------|---------------|--------------------|
|             | -           | -         |                | No                  | 71              | 80            | TPWCTAFAAY         |
| flexi_NRBOX | 85          | 91        | AVGELLA        | Yes                 | 86              | 90            | VGELL              |
| MYND_1      | 98          | 102       | PGLLP          | No                  | -               | -             |                    |
|             | -           | -         |                | No                  | 111             | 120           | FVSLPVVCDAA        |

EBV DBP (P03227)

Gene: BALF2 ; Protein Family: DBP

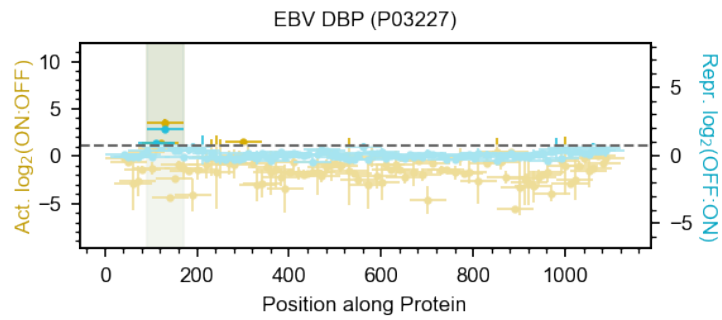

---

Extended repression domain from residues 91 to 180:

YVFHNAHMVPPIFEGPGLAALCGETREVFVGYDAYSALPRESSKPGDFFPEGLDPSAYLGAVAITEAFKERLYSGNLVAIPSLKQEVAVGQ

Max tile of repression domain from residues 91 to 170 (estimated 41.6% to 42.1% of cells repressed):

YVFHNAHMVPPIFEGPGLAALCGETREVFVGYDAYSALPRESSKPGDFFPEGLDPSAYLGAVAITEAFKERLYSGNLVAIP

---

Extended activation domain from residues 81 to 170:

LRATSYHRDIYVFHNAHMVPPIFEGPGLAALCGETREVFVGYDAYSALPRESSKPGDFFPEGLDPSAYLGAVAITEAFKERLYSGNLVAIP

Max tile of activation domain from residues 91 to 170 (estimated 9.2% to 16.2% of cells activated):

YVFHNAHMVPPIFEGPGLAALCGETREVFVGYDAYSALPRESSKPGDFFPEGLDPSAYLGAVAITEAFKERLYSGNLVAIP

---

### HCMV DBP (P17147)

Gene: UL57 ; Protein Family: DBP

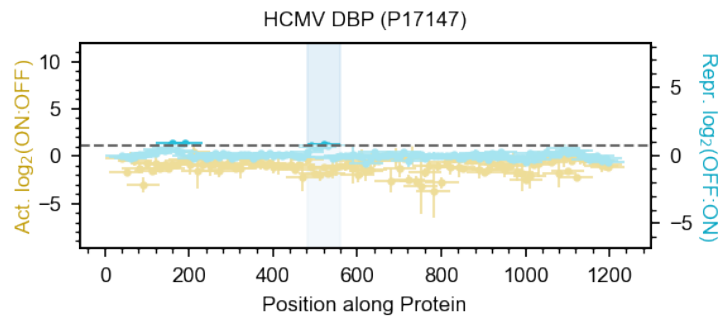

---

Extended repression domain from residues 481 to 570:

HTCYQTAFVRVRLPVVPKQPKKEPCVITVQSRFLNDVDILGSFGRRYNVDAKDGGLDGKGDDGVPGGGAGGGGGGRDVSGGPSDGLGGG

Max tile of repression domain from residues 481 to 560 (estimated 15.7% to 17.1% of cells repressed):

HTCYQTAFVRVRLPVVPKQPKKEPCVITVQSRFLNDVDILGSFGRRYNVDAKDGGLDGKGDDGVPGGGAGGGGGGRDVS

---



HHV7 DBP (P52339)

Gene: U41 ; Protein Family: DBP

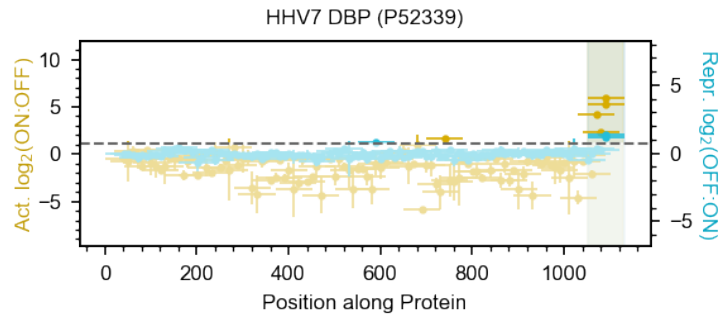

Extended activation domain from residues 1031 to 1131:

AEVMKDRDSKPTMDDMLFYVDGREPLAKSVMNKIQHLTDLNVHDFSLSTLLSVFEEQVEDSAAIYDFSELLVEGNEQGFGLKCEETEHEEENEPSLKKAR  
L

Max tile of activation domain from residues 1051 to 1130 (estimated 52.6% to 56.1% of cells activated):

DGREPLAKSVMNKIQHLTDLNVHDFSLSTLLSVFEEQVEDSAAIYDFSELLVEGNEQGFGLKCEETEHEEENEPSLKKAR

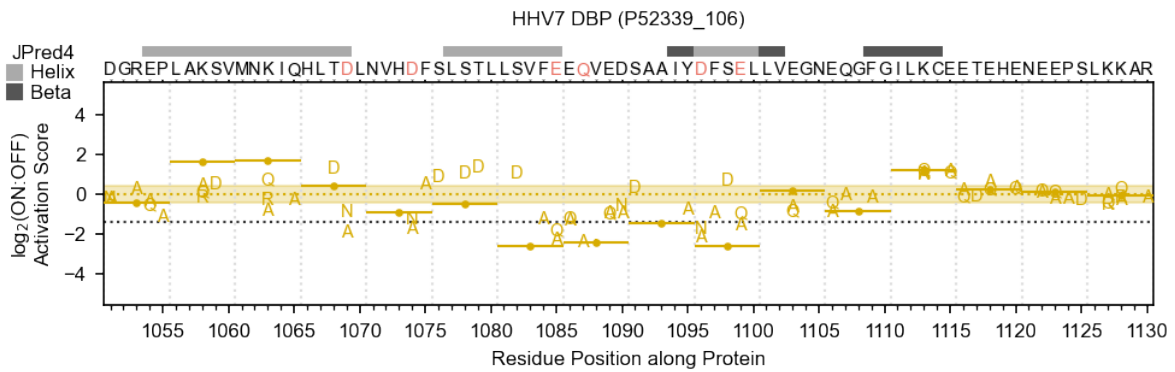

| Motif Name   | Motif Start | Motif End | Motif Sequence | Overlaps Essential? | Essential Start | Essential End | Essential Sequence   |
|--------------|-------------|-----------|----------------|---------------------|-----------------|---------------|----------------------|
| LIG_NRBOX    | 1076        | 1082      | SLSTLLS        | Yes                 | 1081            | 1100          | LSVFEEQVEDSAAIYDFSEL |
| SUMO_SIM_par | 1078        | 1086      | STLLSVFEE      | Yes                 | 1081            | 1100          | LSVFEEQVEDSAAIYDFSEL |
| flexi_NRBOX  | 1079        | 1085      | TLLSVFE        | Yes                 | 1081            | 1100          | LSVFEEQVEDSAAIYDFSEL |
| flexi_NRBOX  | 1096        | 1102      | DFSELLV        | Yes                 | 1081            | 1100          | LSVFEEQVEDSAAIYDFSEL |
| SUMO_for     | 1112        | 1115      | LKCE           | No                  | -               | -             |                      |

Extended repression domain from residues 1051 to 1131:

DGREPLAKSVMNKIQHLTDLNVHDFSLSTLLSVFEEQVEDSAAIYDFSELLVEGNEQGFGLKCEETEHEEENEPSLKKARL

Max tile of repression domain from residues 1052 to 1131 (estimated 24.8% to 28.8% of cells repressed):

GREPLAKSVMNKIQHLTDLNVHDFSLSTLLSVFEEQVEDSAAIYDFSELLVEGNEQGFGLKCEETEHEEENEPSLKKARL

Neighboring tile of repression domain from 1052 to 1131:

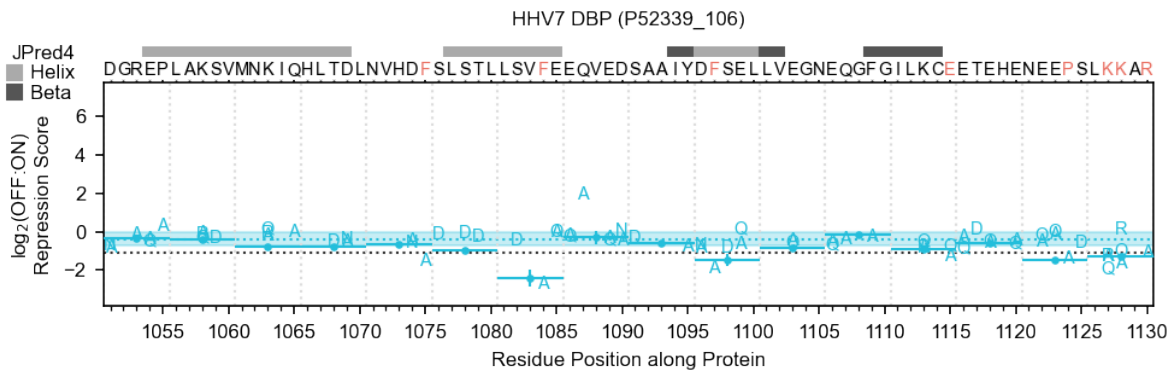

**Herpesvirus Tiling and Perturbation Screen Data from Ludwig, C.H. et al. 2023**

| Motif Name   | Motif Start | Motif End | Motif Sequence | Overlaps Essential? | Essential Start | Essential End | Essential Sequence |
|--------------|-------------|-----------|----------------|---------------------|-----------------|---------------|--------------------|
| LIG_NRBOX    | 1076        | 1082      | SLSTLLS        | Yes                 | 1081            | 1085          | LSVFE              |
| SUMO_SIM_par | 1078        | 1086      | STLLSVFEE      | Yes                 | 1081            | 1085          | LSVFE              |
| flexi_NRBOX  | 1079        | 1085      | TLLSVFE        | Yes                 | 1081            | 1085          | LSVFE              |
| flexi_NRBOX  | 1096        | 1102      | DFSELLV        | Yes                 | 1096            | 1100          | DFSEL              |
| SUMO_for     | 1112        | 1115      | LKCE           | No                  | -               | -             |                    |
|              | -           | -         |                | No                  | 1121            | 1130          | NEEPSLKKAR         |

---

HSV1 DBP (P04296)

Gene: UL29 ; Protein Family: DBP

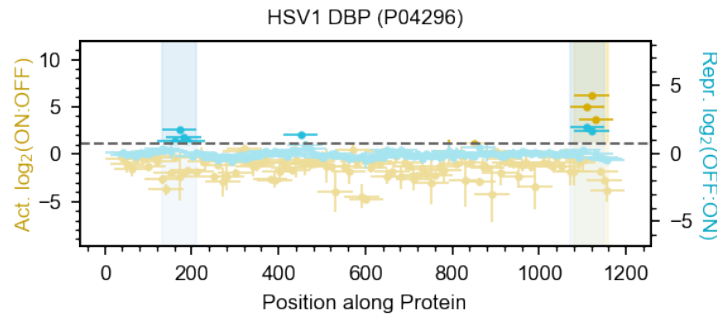

Extended repression domain from residues 121 to 230:

RHFGFSDYTPRPGDLKHETTGEALCERLGLDPDRALLYLVVTEGFKEAVCINNTFLHLGGSDKVTIGGAEVHRIPVYPLQLFMPDFSRVIAEPFNANHRISIGEKFTYPLP

Max tile of repression domain from residues 131 to 210 (estimated 33.3% to 38.3% of cells repressed):

RPGDLKHETTGEALCERLGLDPDRALLYLVVTEGFKEAVCINNTFLHLGGSDKVTIGGAEVHRIPVYPLQLFMPDFSRVI

Extended repression domain from residues 1071 to 1160:

ATVKSLGPRTQQLQIEDWLALLEDEYLSSEEMMELTARALERNGGEWSTDAALEVAHEAEALVSQLGNAGEVFNFGDFGCEDDNATPFGGPP

Max tile of repression domain from residues 1071 to 1150 (estimated 41.1% to 43.0% of cells repressed):

ATVKSLGPRTQQLQIEDWLALLEDEYLSSEEMMELTARALERNGGEWSTDAALEVAHEAEALVSQLGNAGEVFNFGDFGCE

Neighboring tile of repression domain from 1081 to 1160:

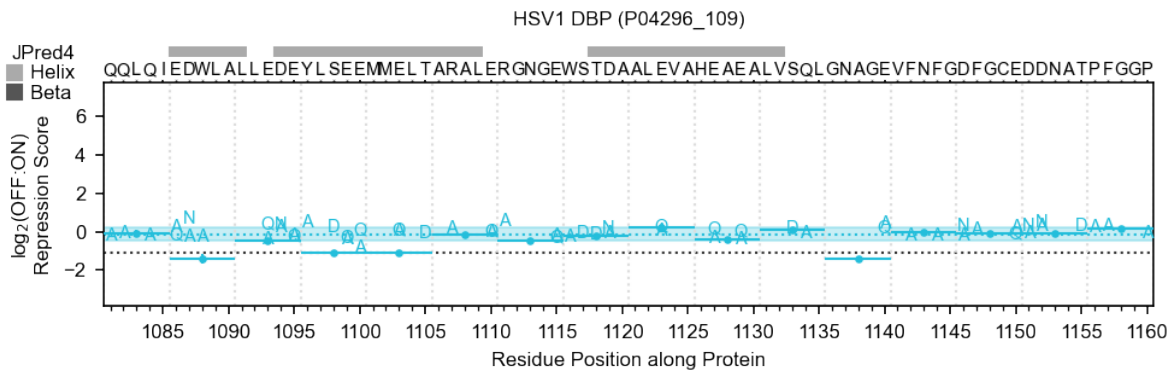

| Motif Name    | Motif Start | Motif End | Motif Sequence | Overlaps Essential? | Essential Start | Essential End | Essential Sequence |
|---------------|-------------|-----------|----------------|---------------------|-----------------|---------------|--------------------|
| SUMO_SIM_anti | 1086        | 1095      | EDWLALLEDE     | Yes                 | 1086            | 1090          | EDWLA              |
| flexi_NRBOX   | 1087        | 1093      | DWLALLE        | Yes                 | 1086            | 1090          | EDWLA              |
|               | -           | -         |                | No                  | 1096            | 1105          | YLSEEMMELT         |
|               | -           | -         |                | No                  | 1136            | 1140          | GNAGE              |

Extended activation domain from residues 1071 to 1170:

ATVKSLGPRTQQLQIEDWLALLEDEYLSSEEMMELTARALERNGGEWSTDAALEVAHEAEALVSQLGNAGEVFNFGDFGCEDDNATPFGGPGAPGPAFAGR

Max tile of activation domain from residues 1081 to 1160 (estimated 58.4% to 61.9% of cells activated):

QQLQIEDWLALLEDEYLSSEEMMELTARALERNGGEWSTDAALEVAHEAEALVSQLGNAGEVFNFGDFGCEDDNATPFGGPP

Herpesvirus Tiling and Perturbation Screen Data from Ludwig, C.H. et al. 2023

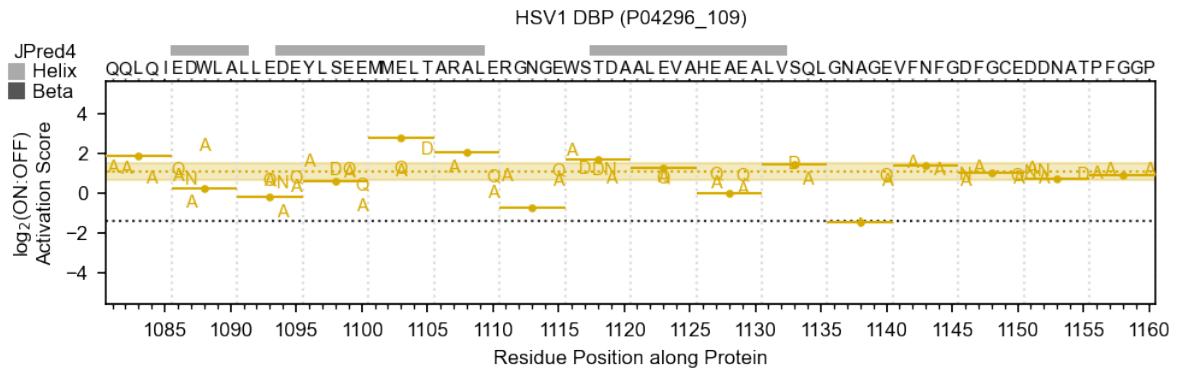

| Motif Name    | Motif Start | Motif End | Motif Sequence | Overlaps Essential? | Essential Start | Essential End | Essential Sequence |
|---------------|-------------|-----------|----------------|---------------------|-----------------|---------------|--------------------|
| SUMO_SIM_anti | 1086        | 1095      | EDWLALLEDE     | No                  | -               | -             |                    |
| flexi_NRBOX   | 1087        | 1093      | DWLALLE        | No                  | -               | -             |                    |
|               | -           | -         |                | No                  | 1136            | 1140          | GNAGE              |

HSV2 DBP (P36384)

Gene: UL29 ; Protein Family: DBP

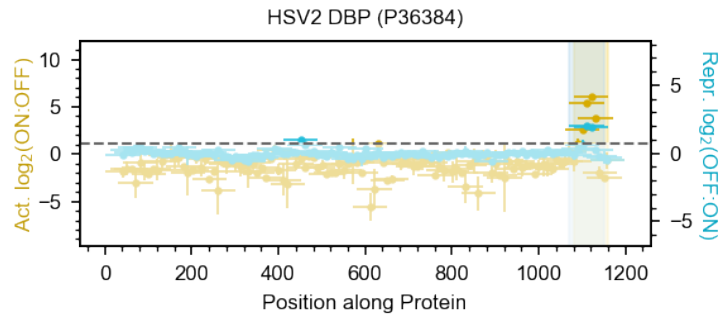

Extended repression domain from residues 1071 to 1160:

ATVKSLGPRTQQLQIEDWLALLEDEYLSEEMMEFTTRALERHGHGEWSTDAALEVAHEAEALVSQLGAAGEVFNFGDFGDADDHAASFGGL

Max tile of repression domain from residues 1071 to 1150 (estimated 41.0% to 44.5% of cells repressed):

ATVKSLGPRTQQLQIEDWLALLEDEYLSEEMMEFTTRALERHGHGEWSTDAALEVAHEAEALVSQLGAAGEVFNFGDFGDA

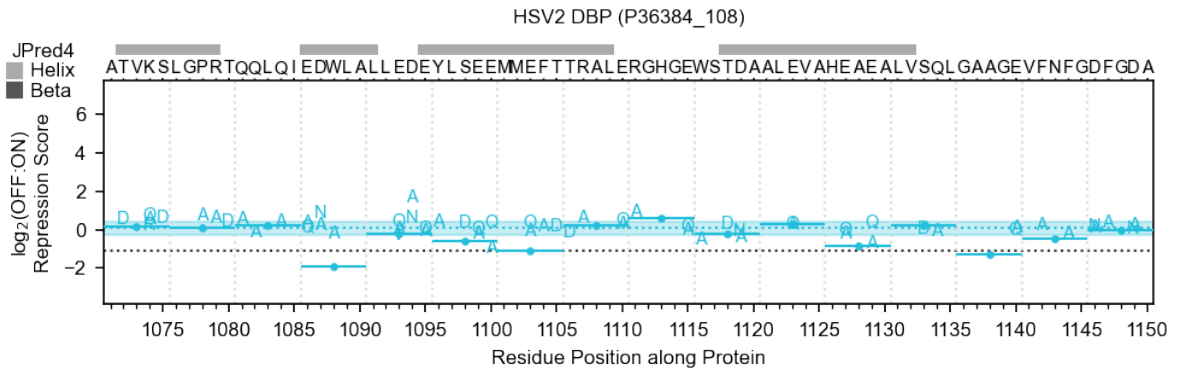

| Motif Name    | Motif Start | Motif End | Motif Sequence | Overlaps Essential? | Essential Start | Essential End | Essential Sequence |
|---------------|-------------|-----------|----------------|---------------------|-----------------|---------------|--------------------|
| SUMO_SIM_anti | 1086        | 1095      | EDWLALLEDE     | Yes                 | 1086            | 1090          | EDWLA              |
| flexi_NRBOX   | 1087        | 1093      | DWLALLE        | Yes                 | 1086            | 1090          | EDWLA              |
|               | -           | -         |                | No                  | 1101            | 1105          | MMEFT              |
|               | -           | -         |                | No                  | 1136            | 1140          | GAAGE              |

Extended activation domain from residues 1061 to 1170:

GAAVASSVFVATVKSLGPRTQQLQIEDWLALLEDEYLSEEMMEFTTRALERHGHGEWSTDAALEVAHEAEALVSQLGAAGEVFNFGDFGDADDHAASFGGLAAAAAGAGV

Max tile of activation domain from residues 1081 to 1160 (estimated 55.7% to 56.4% of cells activated):

QQLQIEDWLALLEDEYLSEEMMEFTTRALERHGHGEWSTDAALEVAHEAEALVSQLGAAGEVFNFGDFGDADDHAASFGGL

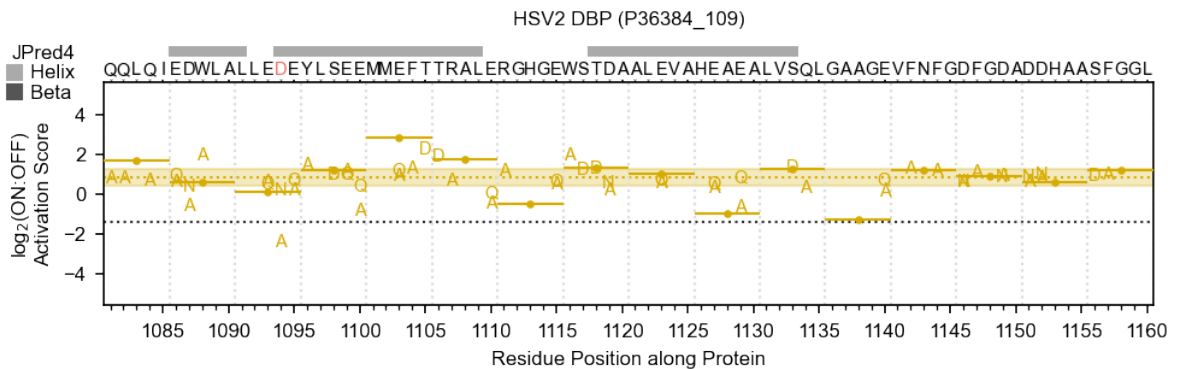

Herpesvirus Tiling and Perturbation Screen Data from Ludwig, C.H. et al. 2023

| Motif Name    | Motif Start | Motif End | Motif Sequence | Overlaps Essential? | Essential Start | Essential End | Essential Sequence |
|---------------|-------------|-----------|----------------|---------------------|-----------------|---------------|--------------------|
| SUMO_SIM_anti | 1086        | 1095      | EDWLALLEDE     | No                  | -               | -             |                    |
| flexi_NRBOX   | 1087        | 1093      | DWLALLE        | No                  | -               | -             |                    |

---

KSHV DBP (Q2HRD3)

Gene: ORF6 ; Protein Family: DBP

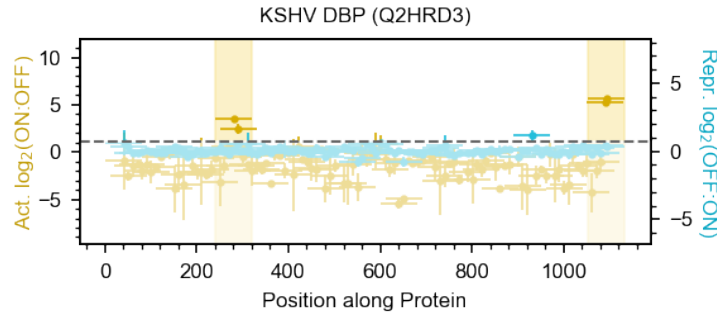

Extended activation domain from residues 241 to 330:

SERQFVHDQYKIPKLVQAKDFPQCASRGTDGSTMVIDSLVAELGMSYGLSFIEGPQDSCEVLNYDTWPIFENCETPDARLRALEVWHAEE

Max tile of activation domain from residues 241 to 320 (estimated 9.9% to 15.0% of cells activated):

SERQFVHDQYKIPKLVQAKDFPQCASRGTDGSTMVIDSLVAELGMSYGLSFIEGPQDSCEVLNYDTWPIFENCETPDAR

Extended activation domain from residues 1051 to 1132:

GDEVLSLLSTVGQAGVPWTAEGVASVIQDIIDDCELFVGPPEEPLIQGQSVVEELFPPSPGVPSLTVGKKRKIASLLSDL

Max tile of activation domain from residues 1053 to 1132 (estimated 42.9% to 51.7% of cells activated):

EVLSLLSTVGQAGVPWTAEGVASVIQDIIDDCELFVGPPEEPLIQGQSVVEELFPPSPGVPSLTVGKKRKIASLLSDL

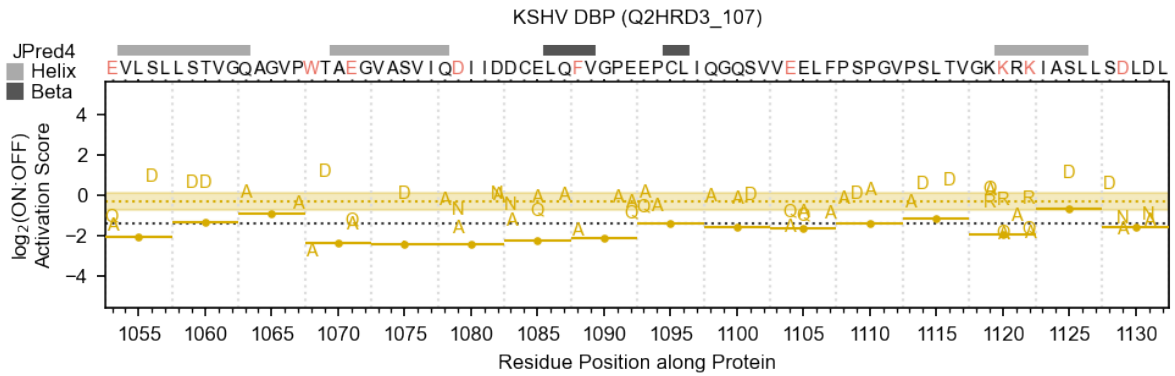

| Motif Name    | Motif Start | Motif End | Motif Sequence | Overlaps Essential? | Essential Start | Essential End | Essential Sequence           |
|---------------|-------------|-----------|----------------|---------------------|-----------------|---------------|------------------------------|
| flexi_NRBOX   | 1053        | 1059      | EVLSLLS        | Yes                 | 1053            | 1057          | EVLSL                        |
| SUMO_SIM_par  | 1053        | 1060      | EVLSLLST       | Yes                 | 1053            | 1057          | EVLSL                        |
| SUMO_SIM_anti | 1053        | 1060      | EVLSLLST       | Yes                 | 1053            | 1057          | EVLSL                        |
| flexi_NRBOX   | 1076        | 1082      | VIQDIID        | Yes                 | 1068            | 1092          | WTAEGVASVIQDIIDDCELFV<br>GPE |
| flexi_NRBOX   | 1072        | 1078      | GVASVIQ        | Yes                 | 1068            | 1092          | WTAEGVASVIQDIIDDCELFV<br>GPE |
|               | -           | -         |                | No                  | 1098            | 1107          | QGQSVVEELF                   |
| flexi_NRBOX   | 1122        | 1128      | KIASLLS        | Yes                 | 1118            | 1122          | GKKRK                        |
| flexi_NRBOX   | 1122        | 1128      | KIASLLS        | Yes                 | 1128            | 1132          | SDL                          |

SuHV1 DBP (P11870)

Gene: UL29 ; Protein Family: DBP

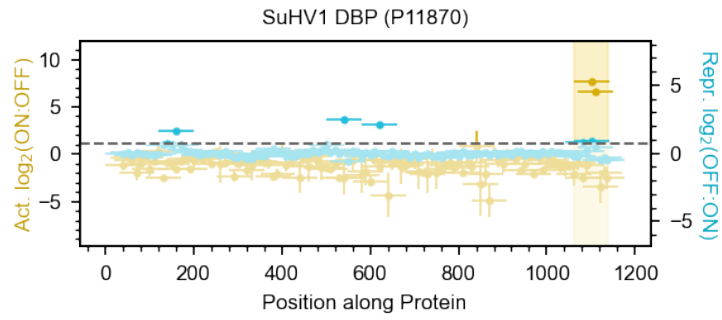

Extended activation domain from residues 1061 to 1150:

ARTQHLEPDDWRAIVDDEFLAAALAEINGRVADRDGRWSVEAAAELVRDLEGQTGADGGEETAFFDFGACGAGGDVAGLAPASLVPALGG

Max tile of activation domain from residues 1061 to 1140 (estimated 82.7% to 85.4% of cells activated):

ARTQHLEPDDWRAIVDDEFLAAALAEINGRVADRDGRWSVEAAAELVRDLEGQTGADGGEETAFFDFGACGAGGDVAGLAP

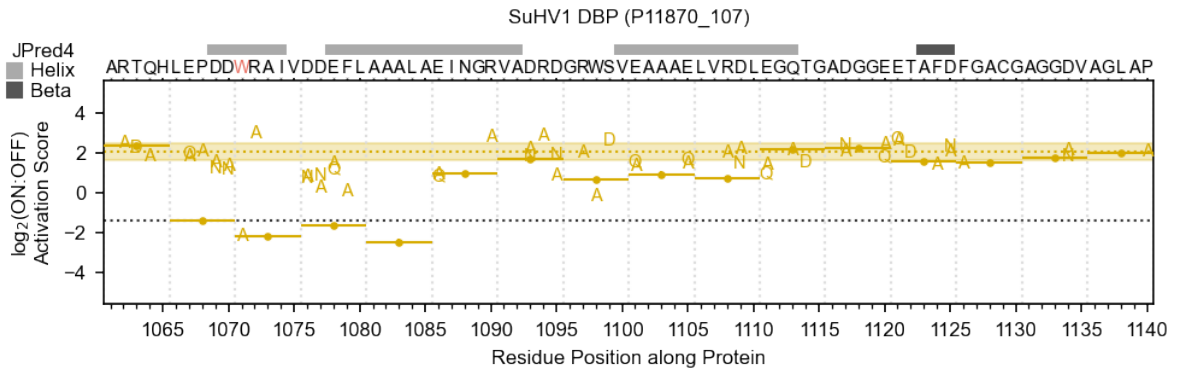

| Motif Name  | Motif Start | Motif End | Motif Sequence | Overlaps Essential? | Essential Start | Essential End | Essential Sequence   |
|-------------|-------------|-----------|----------------|---------------------|-----------------|---------------|----------------------|
| flexi_NRBOX | 1070        | 1076      | DWRAIVD        | Yes                 | 1066            | 1085          | LEPDDWRAIVDDEFLAAALA |
| Sin3A_SID   | 1102        | 1106      | AAAEL          | No                  | -               | -             |                      |



VZV DBP (P09246)

Gene: ORF29 ; Protein Family: DBP

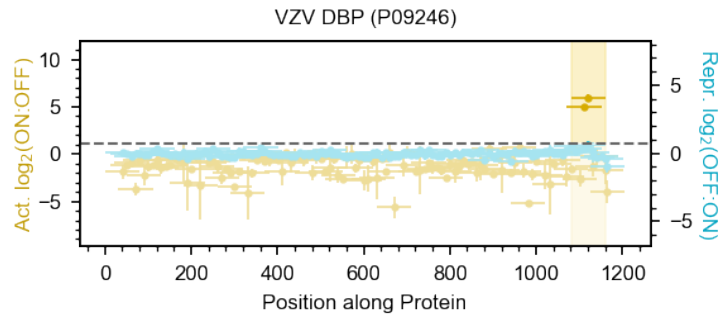

Extended activation domain from residues 1071 to 1160:

ATVVRVAVGARQAQMFAFDDWLSLTDDEFLARDLEELHDQIIQTLETPWTVEGALEAVKILDEKTTAGDGETPTNLAFNFDSCPEPSHDTTSN

Max tile of activation domain from residues 1081 to 1160 (estimated 48.5% to 62.9% of cells activated):

AQHMAFDDWLSLTDDEFLARDLEELHDQIIQTLETPWTVEGALEAVKILDEKTTAGDGETPTNLAFNFDSCPEPSHDTTSN

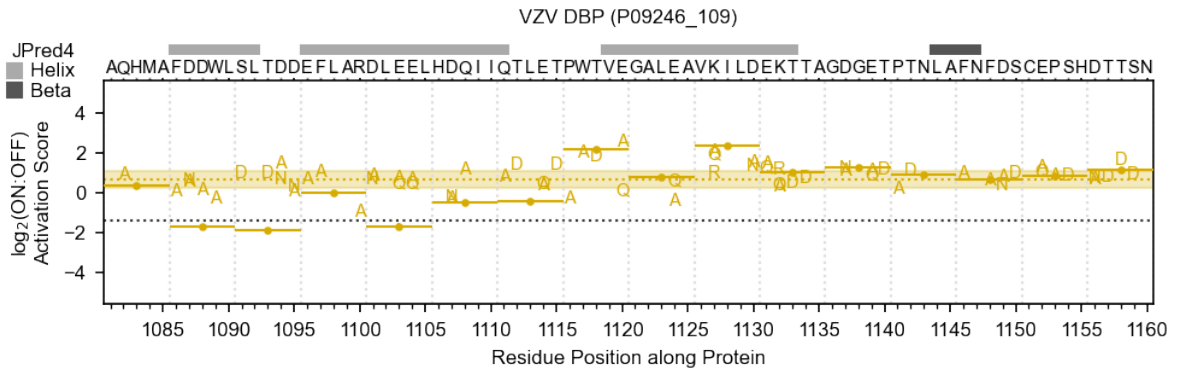

| Motif Name    | Motif Start | Motif End | Motif Sequence | Overlaps Essential? | Essential Start | Essential End | Essential Sequence |
|---------------|-------------|-----------|----------------|---------------------|-----------------|---------------|--------------------|
|               | -           | -         |                | No                  | 1086            | 1095          | FDDWLSLTDD         |
|               | -           | -         |                | No                  | 1101            | 1105          | DLEEL              |
| SUMO_rev      | 1124        | 1134      | EAVKILDEKTT    | No                  | -               | -             |                    |
| CtBP_expanded | 1141        | 1145      | PTNLA          | No                  | -               | -             |                    |

EBV DPOL (P03198)

Gene: BALF5 ; Protein Family: DPOL

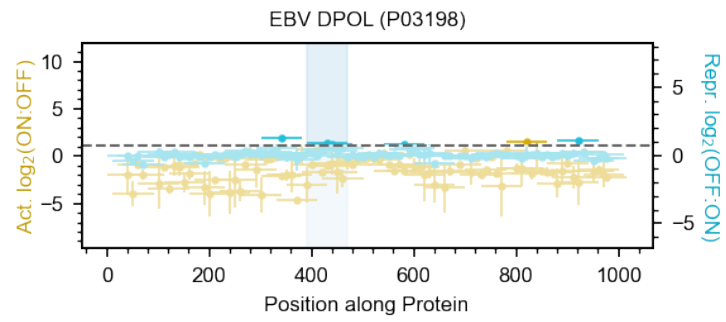

---

Extended repression domain from residues 391 to 480:

RARHIYSINPASLGKIRAGGVCEVRRPHDAGKGFLRANTKVRITGLIPIDMYAVCRDKLSLSDYKLDTVARHLLGAKKEDVHYKEIPRLF

Max tile of repression domain from residues 391 to 470 (estimated 18.0% to 18.3% of cells repressed):

RARHIYSINPASLGKIRAGGVCEVRRPHDAGKGFLRANTKVRITGLIPIDMYAVCRDKLSLSDYKLDTVARHLLGAKKED

---

HHV6B DR1 (Q9PWX1)

Gene: DR1 ; Protein Family: DR1

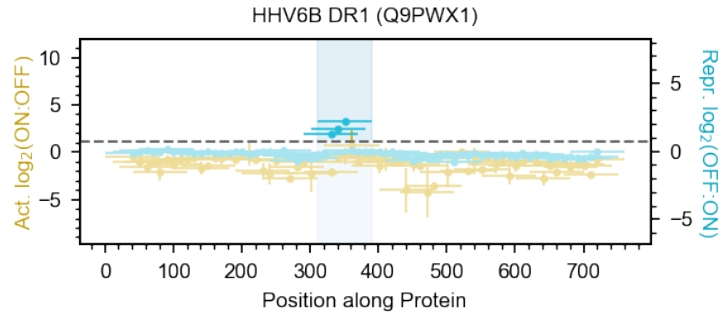

Extended repression domain from residues 291 to 390:

GKEEAERGGRQQATDRLASPHLTRRRDCGRSLQGEEPSAAEDFARCRPLLDLCEGGGWLPFAFLTASPHVCLILTEGGPVLALDLNDTSLWRIAD  
LE

Max tile of repression domain from residues 311 to 390 (estimated 46.9% to 51.4% of cells repressed):

HLTRRRDCGRSLQGEEPSAAEDFARCRPLLDLCEGGGWLPFAFLTASPHVCLILTEGGPVLALDLNDTSLWRIADDLE

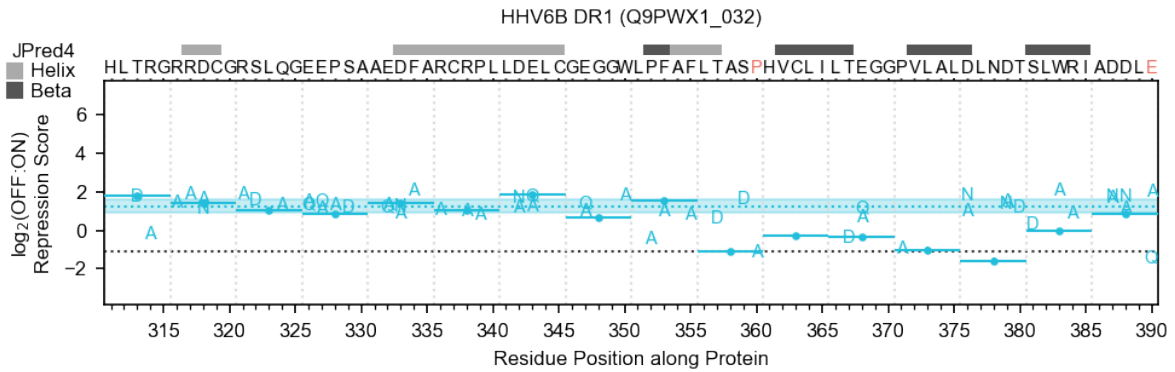

| Motif Name   | Motif Start | Motif End | Motif Sequence | Overlaps Essential? | Essential Start | Essential End | Essential Sequence |
|--------------|-------------|-----------|----------------|---------------------|-----------------|---------------|--------------------|
|              | -           | -         |                | No                  | 356             | 360           | LTASP              |
| flexi_NRBOX  | 361         | 367       | HVCLILT        | No                  | -               | -             |                    |
| SUMO_SIM_par | 371         | 376       | PVLALD         | Yes                 | 376             | 380           | DLNDT              |

HHV6A DR2 (Q89893)

Gene: DR2 ; Protein Family: DR2

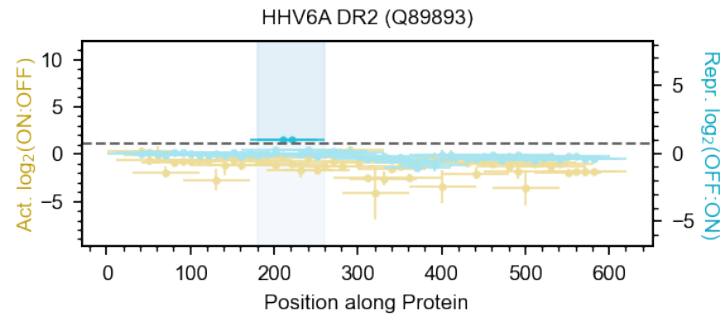

---

Extended repression domain from residues 171 to 260:

PVLEWESTELVLTDWRRGRNEAQRDAPSVAEHFARCRPLLDELCEGGWLPFAFLSTSPHVWLILTEGGPVLAVDVNDTSVWRIADDLEL

Max tile of repression domain from residues 181 to 260 (estimated 18.4% to 20.2% of cells repressed):

VLTDWRRGRNEAQRDAPSVAEHFARCRPLLDELCEGGWLPFAFLSTSPHVWLILTEGGPVLAVDVNDTSVWRIADDLEL

---

HHV6B DR3 (Q9PX32)

Gene: DR3 ; Protein Family: DR3

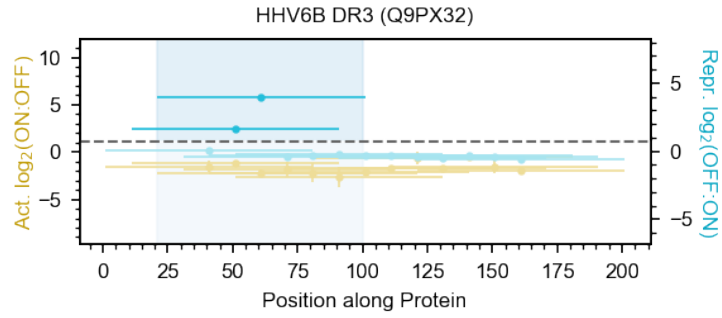

Extended repression domain from residues 11 to 100:

ACVCAGLCCWCMGVICGDCQRWRRRCARWGRVGRVLDGGAWRVRSGDGARSVSRTCETERAPSAARSPVYSPPFVLVSSSSSSSCSS

Max tile of repression domain from residues 21 to 100 (estimated 86.5% to 87.7% of cells repressed):

VCMGVICGDCQRWRRRCARWGRVGRVLDGGAWRVRSGDGARSVSRTCETERAPSAARSPVYSPPFVLVSSSSSSSCSS

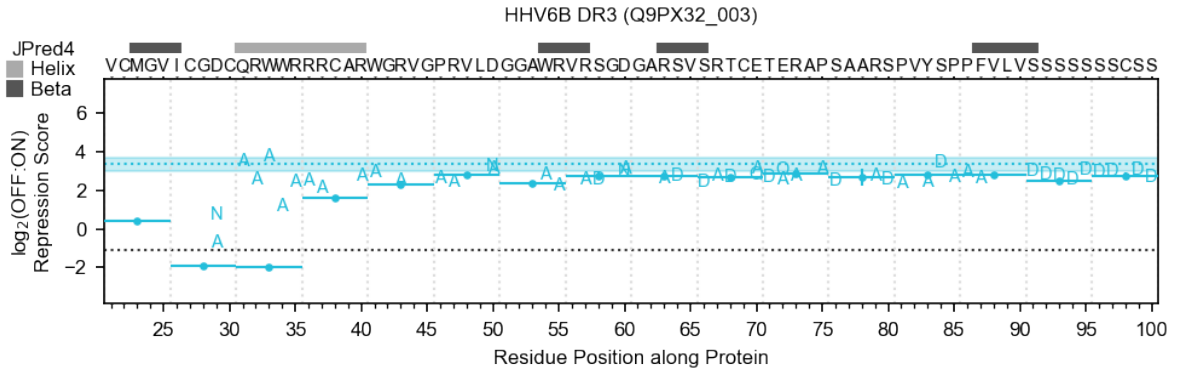

| Motif Name | Motif Start | Motif End | Motif Sequence | Overlaps Essential? | Essential Start | Essential End | Essential Sequence |
|------------|-------------|-----------|----------------|---------------------|-----------------|---------------|--------------------|
|            | -           | -         |                | No                  | 26              | 35            | ICGDCQRWWR         |

HSV2 DUT (P89469)

Gene: UL50 ; Protein Family: DUT

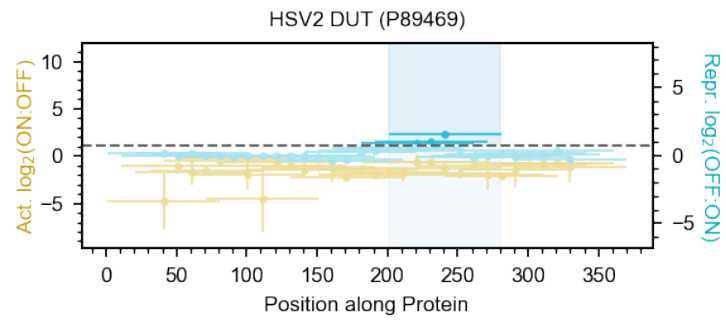

---

Extended repression domain from residues 181 to 280:

RRGGLVYAGELTQVTTEHGDCVHEAPFLPKREEDAGFDILIHRAVTPANGATVIQPSLRVLAADGPEACYVLGRSSLNARGLLVMPTRWPSGHAC  
A

Max tile of repression domain from residues 201 to 280 (estimated 28.8% to 36.5% of cells repressed):

DCVHEAPFLPKREEDAGFDILIHRAVTPANGATVIQPSLRVLAADGPEACYVLGRSSLNARGLLVMPTRWPSGHACA

---

EBV EBNA1 (P03211)

Gene: BKRF1 ; Protein Family: EBNA ; EBV Strain: B95-8 (Type 1)

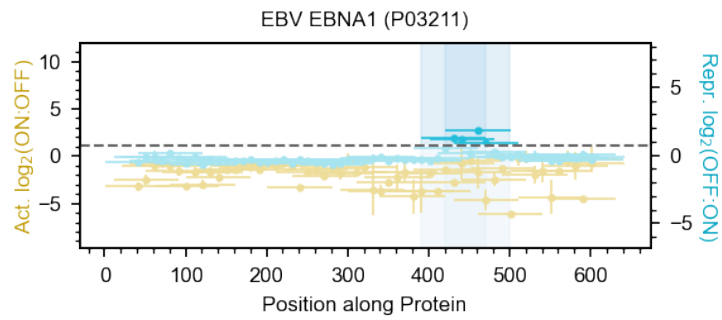

---

Extended repression domain from residues 391 to 480:

SGSPRRPPPGRRPFFHPVGEADYFEYHQEGGPDGEPDVPPGAIEQGPADDPGEGPSTGPRGQGDGRRKKGWFGKHRGQGGSNPKFEN

Max tile of repression domain from residues 391 to 470 (estimated 22.4% to 28.8% of cells repressed):

SGSPRRPPPGRRPFFHPVGEADYFEYHQEGGPDGEPDVPPGAIEQGPADDPGEGPSTGPRGQGDGRRKKGWFGKHRG

---

Extended repression domain from residues 421 to 510:

GGPDGEPDVPPGAIEQGPADDPGEGPSTGPRGQGDGRRKKGWFGKHRGQGGSNPKFENIAEGLRALLARSHVERTTDEGTWVAGVFVY

Max tile of repression domain from residues 421 to 500 (estimated 35.2% to 41.0% of cells repressed):

GGPDGEPDVPPGAIEQGPADDPGEGPSTGPRGQGDGRRKKGWFGKHRGQGGSNPKFENIAEGLRALLARSHVERTTDE

---

EBV EBNA1 (Q1HVF7)

Gene: BKRF1 ; Protein Family: EBNA ; EBV Strain: AG876 (Type 2)

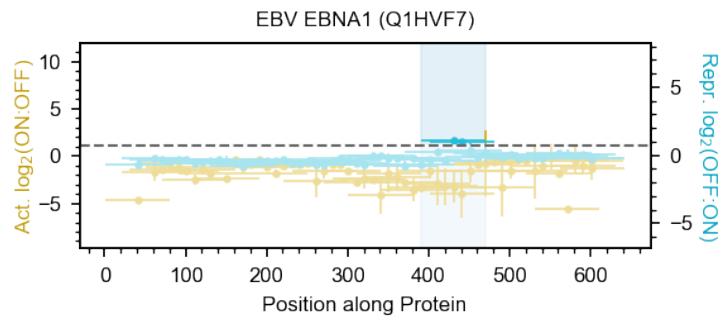

---

Extended repression domain from residues 391 to 480:

SGSPRRPPPGRPPFFHPVAEADYFEYHQEGGPDGEPDMPPGAIEQGPADDPGEGPSTGPRGQGDGRRKGGWYGKHRGEGGSSQKFEN

Max tile of repression domain from residues 391 to 470 (estimated 16.3% to 26.0% of cells repressed):

SGSPRRPPPGRPPFFHPVAEADYFEYHQEGGPDGEPDMPPGAIEQGPADDPGEGPSTGPRGQGDGRRKGGWYGKHRG

---



EBV EBNA1 (Q3KSS4)

Gene: BKRF1 ; Protein Family: EBNA ; EBV Strain: GD1 (Type 1)

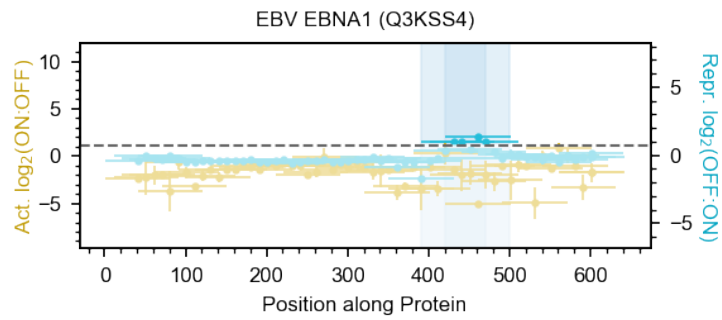

---

Extended repression domain from residues 391 to 480:

SGSPRRPPPGRRPFFHPVGDADYFEYLQEGGPDGEPDVPPGAIEQGPTDDPGEGPSTGPRGQGDGRRKGGWFGKHRGQGGSNPKFEN

Max tile of repression domain from residues 391 to 470 (estimated 18.2% to 20.2% of cells repressed):

SGSPRRPPPGRRPFFHPVGDADYFEYLQEGGPDGEPDVPPGAIEQGPTDDPGEGPSTGPRGQGDGRRKGGWFGKHRG

---

Extended repression domain from residues 421 to 510:

GGPDGEPDVPPGAIEQGPTDDPGEGPSTGPRGQGDGRRKGGWFGKHRGQGGSNPKFENIAEGLRVLLARSHVERTTEEGNWWAGVFVY

Max tile of repression domain from residues 421 to 500 (estimated 25.7% to 29.8% of cells repressed):

GGPDGEPDVPPGAIEQGPTDDPGEGPSTGPRGQGDGRRKGGWFGKHRGQGGSNPKFENIAEGLRVLLARSHVERTTEE

---



Herpesvirus Tiling and Perturbation Screen Data from Ludwig, C.H. et al. 2023

| Motif Name    | Motif Start | Motif End | Motif Sequence | Overlaps Essential? | Essential Start | Essential End | Essential Sequence |
|---------------|-------------|-----------|----------------|---------------------|-----------------|---------------|--------------------|
| MYND_1        | 437         | 441       | PILFP          | Yes                 | 436             | 445           | APILFPDDWY         |
| CtBP_expanded | 451         | 455       | PADLD          | No                  | -               | -             |                    |
| flexi_NRBOX   | 457         | 463       | SWDYIFE        | No                  | -               | -             |                    |

---

EBV EBNA2 (Q3KSV2)

Gene: BYRF1 ; Protein Family: EBNA ; EBV Strain: GD1 (Type 1)

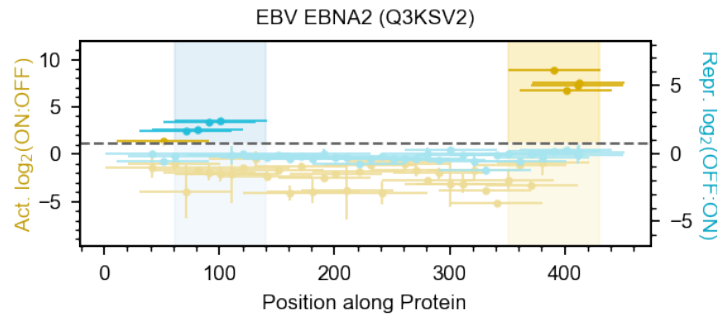

Extended repression domain from residues 31 to 140:

IPSNPYQEQLSDTPLIPLTIFVGENTGVPPPPPPPPQRRDAWTQEPSPLDWDPLGYDVGHGPLASAMRMLWMANYIVRQSRGDRGLILPQGPQTAPQAMLVQPHVPLLRP

Max tile of repression domain from residues 61 to 140 (estimated 47.2% to 60.1% of cells repressed):

PPPPPQRRDAWTQEPSPLDWDPLGYDVGHGPLASAMRMLWMANYIVRQSRGDRGLILPQGPQTAPQAMLVQPHVPLLRP

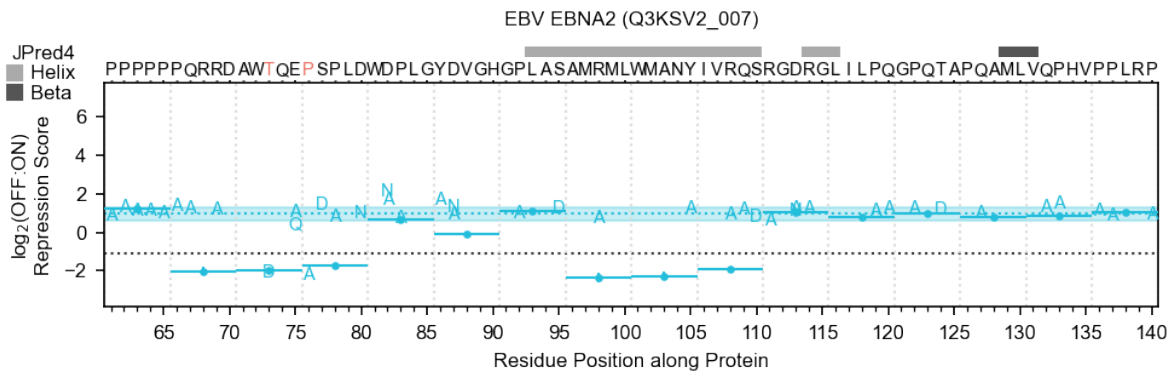

| Motif Name | Motif Start | Motif End | Motif Sequence | Overlaps Essential? | Essential Start | Essential End | Essential Sequence |
|------------|-------------|-----------|----------------|---------------------|-----------------|---------------|--------------------|
|            | -           | -         |                | No                  | 66              | 80            | PQRRDAWTQEPSPLD    |
|            | -           | -         |                | No                  | 96              | 110           | AMRMLWMANYIVRQS    |
| MYND_1     | 136         | 140       | PPLRP          | No                  | -               | -             |                    |

Extended activation domain from residues 351 to 451:

PVLGLHQGGAGDSPTPGPSNAAPVCRNSHTATPNVSP IHEPESHNSPEAPILFPDDWYPPSIDPADLDESWDYIFETTESPSSDEDYVEGPSKRPRPSI Q

Max tile of activation domain from residues 351 to 430 (estimated 92.9% to 92.9% of cells activated):

PVLGLHQGGAGDSPTPGPSNAAPVCRNSHTATPNVSP IHEPESHNSPEAPILFPDDWYPPSIDPADLDESWDYIFETTE

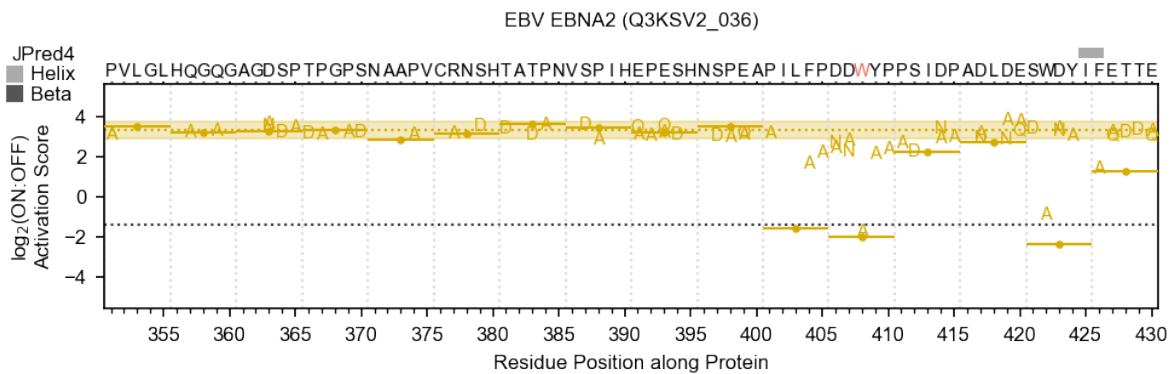

**Herpesvirus Tiling and Perturbation Screen Data from Ludwig, C.H. et al. 2023**

| Motif Name    | Motif Start | Motif End | Motif Sequence | Overlaps Essential? | Essential Start | Essential End | Essential Sequence |
|---------------|-------------|-----------|----------------|---------------------|-----------------|---------------|--------------------|
| MYND_1        | 401         | 405       | PILFP          | Yes                 | 401             | 410           | PILFPDDWYP         |
| CtBP_expanded | 415         | 419       | PADLD          | No                  | -               | -             |                    |
| flexi_NRBOX   | 421         | 427       | SWDYIFE        | Yes                 | 421             | 425           | SWDYI              |

---

EBV EBNA2 (Q69022)

Gene: BYRF1 ; Protein Family: EBNA ; EBV Strain: AG876 (Type 2)

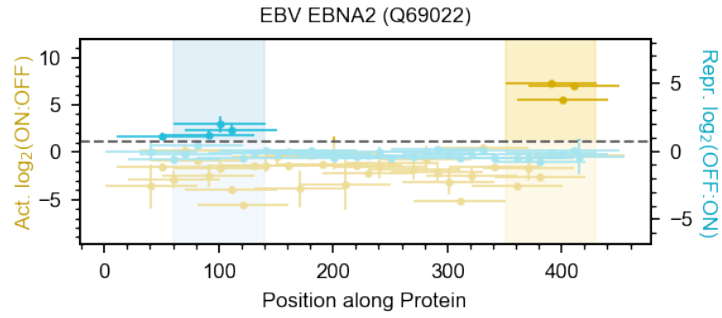

Extended repression domain from residues 51 to 150:

VVGENTGAPAPPQPPPPPPPPERRDAWTQEPLPLDMNPLGSDASQGGLASSIRMLCMAQYLLRNARGQQGLLRPLGPQTRSQVTLERQPVHNPRQEA

Max tile of repression domain from residues 61 to 140 (estimated 27.3% to 59.3% of cells repressed):

PPQPPPPPPPPERRDAWTQEPLPLDMNPLGSDASQGGLASSIRMLCMAQYLLRNARGQQGLLRPLGPQTRSQVTLER

Extended activation domain from residues 351 to 450:

QLSPVSLHQGGPENSPPTGPGSTAGPVCRVTPSATPDISPIHEPESSDSEPPFLFSPDWYPPTLEPAELDESWEIGIFETTESHSDEENVGGPSKRPR

Max tile of activation domain from residues 351 to 430 (estimated 76.5% to 83.1% of cells activated):

QLSPVSLHQGGPENSPPTGPGSTAGPVCRVTPSATPDISPIHEPESSDSEPPFLFSPDWYPPTLEPAELDESWEIGIFE

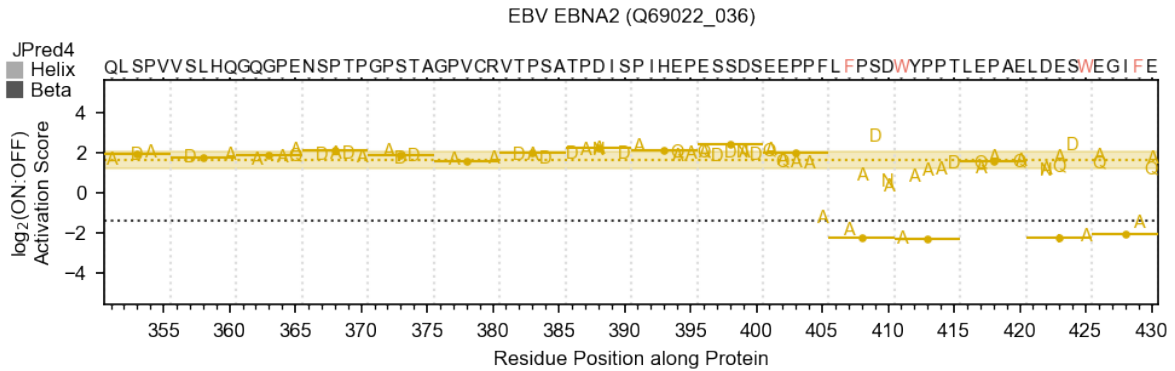

| Motif Name    | Motif Start | Motif End | Motif Sequence | Overlaps Essential? | Essential Start | Essential End | Essential Sequence |
|---------------|-------------|-----------|----------------|---------------------|-----------------|---------------|--------------------|
| HP1           | 354         | 358       | PVVSL          | No                  | -               | -             |                    |
| MYND_1        | 404         | 408       | PFLFP          | Yes                 | 406             | 415           | LFPSDWYPPT         |
| MYND_1        | 414         | 418       | PTLEP          | Yes                 | 406             | 415           | LFPSDWYPPT         |
| CtBP_expanded | 418         | 422       | PAELD          | Yes                 | 421             | 430           | LDESWEIGIFE        |
| flexi_NRBOX   | 424         | 430       | SWEGIFE        | Yes                 | 421             | 430           | LDESWEIGIFE        |

EBV EBNA3 (P12977)

Gene: BLRF3-BERF1 ; Protein Family: EBNA ; EBV Strain: B95-8 (Type 1)

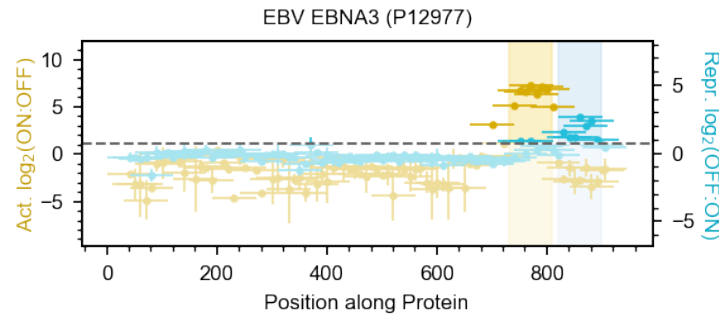

Extended activation domain from residues 701 to 850:

YFDIPLTEPINQGASAAHFLPQQPMEGPLVPEQWMFPGAALSQSVRPGVAQSQYFDLPLTQPINHGAPAAHFLHQPPMEGPWWPEQWMFQGAPPSQG TDVVQHQLDALGYTLHGLNHPGVPVSPAVNQYHLSQAAFGLPIDEDESGEGSD

Max tile of activation domain from residues 731 to 810 (estimated 79.1% to 81.2% of cells activated):

PEQWMFPGAALSQSVRPGVAQSQYFDLPLTQPINHGAPAAHFLHQPPMEGPWWPEQWMFQGAPPSQGTDDVVQHQLDALGY

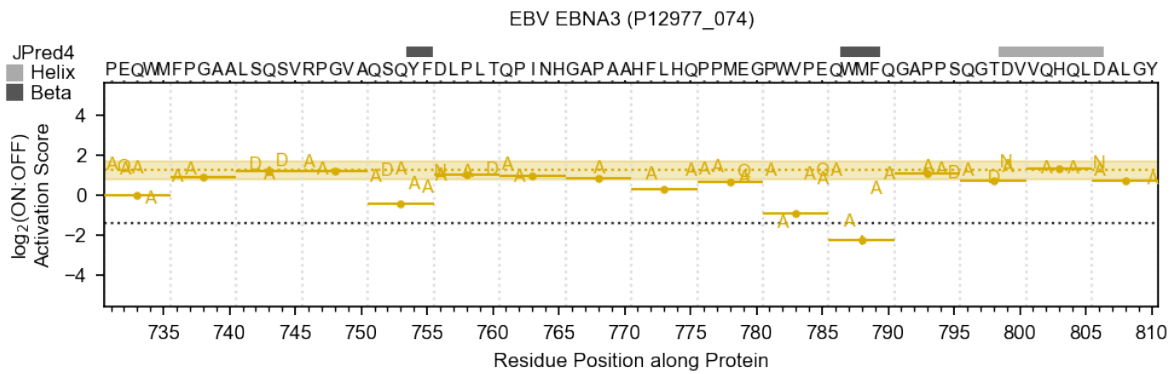

| Motif Name | Motif Start | Motif End | Motif Sequence | Overlaps Essential? | Essential Start | Essential End | Essential Sequence |
|------------|-------------|-----------|----------------|---------------------|-----------------|---------------|--------------------|
| Sin3A_SID  | 769         | 773       | AAHFL          | No                  | -               | -             |                    |
| CSL_BTD_1  | 781         | 784       | PWVP           | No                  | -               | -             |                    |
|            | -           | -         |                | No                  | 786             | 790           | QWMFQ              |

Extended repression domain from residues 791 to 930:

GAPPSQGTDDVVQHQLDALGYTLHGLNHPGVPVSPAVNQYHLSQAAFGLPIDEDESGEGSDTSEPCEALDLSIHGRPCQAPEWPVQEEGGQDATEVLDLSIHGRPRPRTPEWPVQEGGQNTGPETRRVVSAVVHMCQ

Max tile of repression domain from residues 821 to 900 (estimated 60.1% to 62.5% of cells repressed):

PVSPAVNQYHLSQAAFGLPIDEDESGEGSDTSEPCEALDLSIHGRPCQAPEWPVQEEGGQDATEVLDLSIHGRPRPRTP

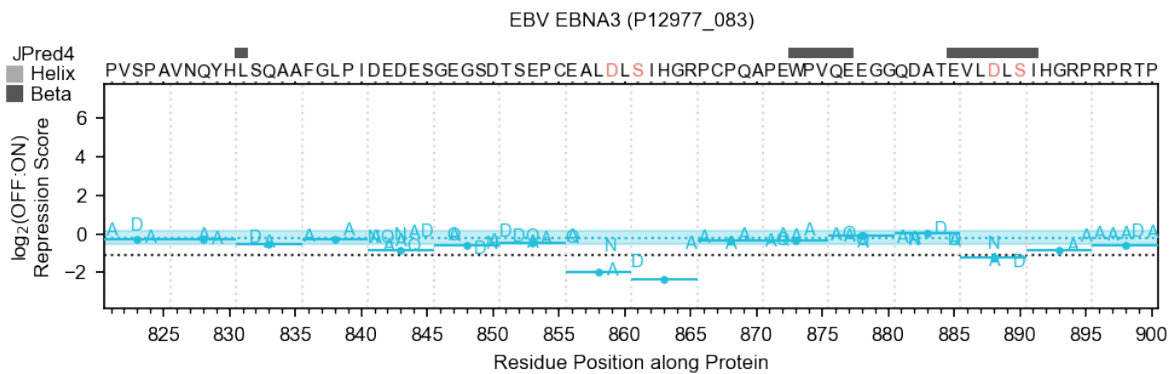

Herpesvirus Tiling and Perturbation Screen Data from Ludwig, C.H. et al. 2023

| Motif Name   | Motif Start | Motif End | Motif Sequence | Overlaps Essential? | Essential Start | Essential End | Essential Sequence |
|--------------|-------------|-----------|----------------|---------------------|-----------------|---------------|--------------------|
| Sin3A_SID    | 834         | 838       | AAFGL          | No                  | -               | -             |                    |
| CtBP_EBNA3   | 858         | 861       | LDLS           | Yes                 | 856             | 865           | EALDLSIHGR         |
| SUMO_SIM_par | 884         | 890       | TEVLDS         | Yes                 | 886             | 890           | VLDLS              |

---



EBV EBNA3 (Q69138)

Gene: BLRF3-BERF1 ; Protein Family: EBNA ; EBV Strain: AG876 (Type 2)

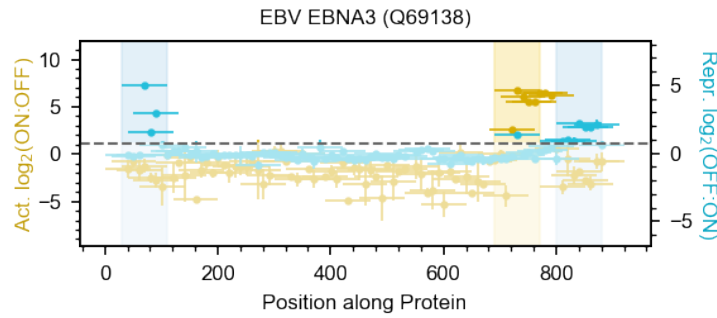

Extended repression domain from residues 31 to 130:

GDWENVLIEISDSSEEEAEDAHLPSQRGKKRKRVD DDAGGSAPAQHVPPPQLDHPGREAILYRFPDLRRFIQAIGAAATHPDTRAI DQFFGSQISNT

Max tile of repression domain from residues 31 to 110 (estimated 95.9% to 96.6% of cells repressed):

GDWENVLIEISDSSEEEAEDAHLPSQRGKKRKRVD DDAGGSAPAQHVPPPQLDHPGREAILYRFPDLRRFIQAIGAA

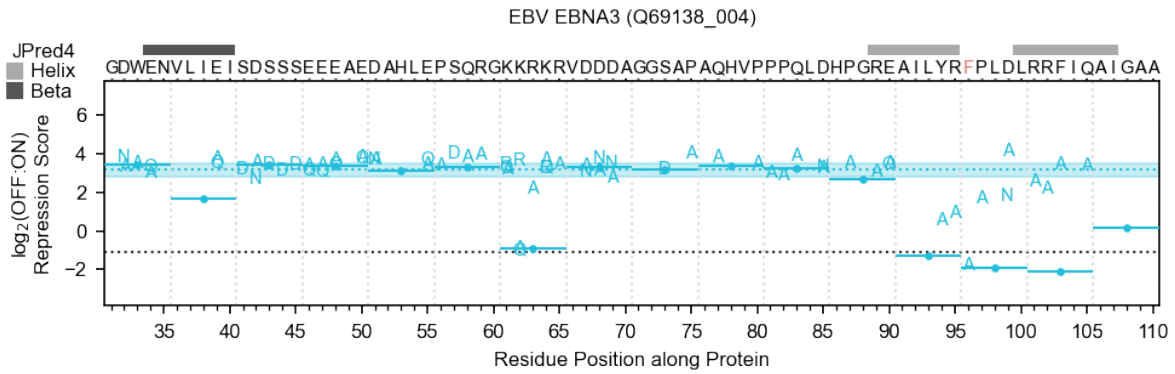

| Motif Name    | Motif Start | Motif End | Motif Sequence | Overlaps Essential? | Essential Start | Essential End | Essential Sequence |
|---------------|-------------|-----------|----------------|---------------------|-----------------|---------------|--------------------|
| flexi_NRBOX   | 32          | 38        | DWENVLI        | No                  | -               | -             |                    |
| SUMO_SIM_par  | 36          | 48        | VLIEISDSSEEE   | No                  | -               | -             |                    |
| CtBP_expanded | 97          | 101       | PLDLR          | Yes                 | 91              | 105           | AILYRFPDLRRFIQ     |
| flexi_NRBOX   | 99          | 105       | DLRRFIQ        | Yes                 | 91              | 105           | AILYRFPDLRRFIQ     |

Extended activation domain from residues 681 to 830:

QYFDIPLTEPINQGASAAHFLPQQPMEGPLVPERWMFQGATLSQSVRPGVAQSQYFDLPLTQPINHGAPAAHFLHQPPMEGPWVPEQWMFQGAPPSQ  
GTDVVQHQLDDLGYPLHDLNHPGVPVSPAVNQYHFSQAAFGLPIDEDES GERS

Max tile of activation domain from residues 691 to 770 (estimated 70.1% to 70.3% of cells activated):

INQGASAAHFLPQQPMEGPLVPERWMFQGATLSQSVRPGVAQSQYFDLPLTQPINHGAPAAHFLHQPPMEGPWVPEQWMF

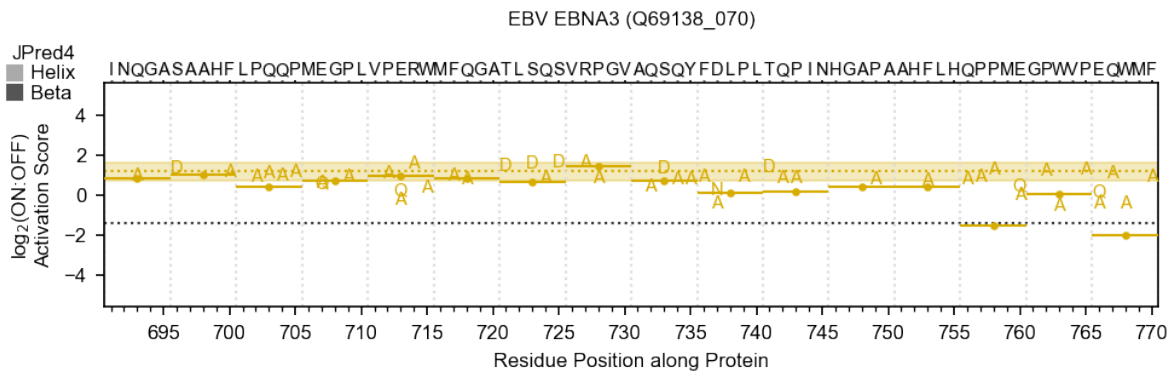

Herpesvirus Tiling and Perturbation Screen Data from Ludwig, C.H. et al. 2023

| Motif Name | Motif Start | Motif End | Motif Sequence | Overlaps Essential? | Essential Start | Essential End | Essential Sequence |
|------------|-------------|-----------|----------------|---------------------|-----------------|---------------|--------------------|
| Sin3A_SID  | 697         | 701       | AAHFL          | No                  | -               | -             |                    |
|            | -           | -         |                | No                  | 756             | 760           | QPPME              |
| CSL_BTD_1  | 762         | 765       | PWVP           | No                  | -               | -             |                    |
|            | -           | -         |                | No                  | 766             | 770           | EQWMF              |

Extended repression domain from residues 771 to 910:

QGAPPSQGTDVVQHLDDLGYPLHDLNHPGVSPAVNQYHFSQAAFGLPIDEDESGERSDTSEPYEALDLSIHGRPCQAPEWPVQEGGQDATEV  
LDLSIHGRPRRTPPEWPVQGESGQNVTDHEPRRVVVSIVHMC

Max tile of repression domain from residues 801 to 880 (estimated 46.6% to 53.0% of cells repressed):

VPVSPAVNQYHFSQAAFGLPIDEDESGERSDTSEPYEALDLSIHGRPCQAPEWPVQEGGQDATEVLDLSIHGRPRRPT

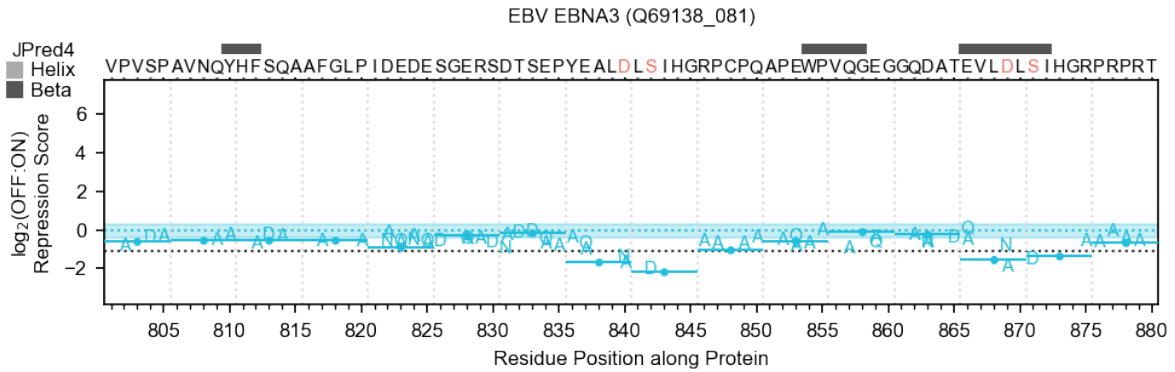

| Motif Name   | Motif Start | Motif End | Motif Sequence | Overlaps Essential? | Essential Start | Essential End | Essential Sequence |
|--------------|-------------|-----------|----------------|---------------------|-----------------|---------------|--------------------|
| Sin3A_SID    | 815         | 819       | AAFGL          | No                  | -               | -             |                    |
| CtBP_EBNA3   | 839         | 842       | LDLS           | Yes                 | 836             | 845           | YEALDLSIHG         |
| SUMO_SIM_par | 865         | 871       | TEVLDS         | Yes                 | 866             | 875           | EVLDSIHGR          |

EBV EBNA4 (P03203)

Gene: BERF2A-BERF2B ; Protein Family: EBNA ; EBV Strain: B95-8 (Type 1)

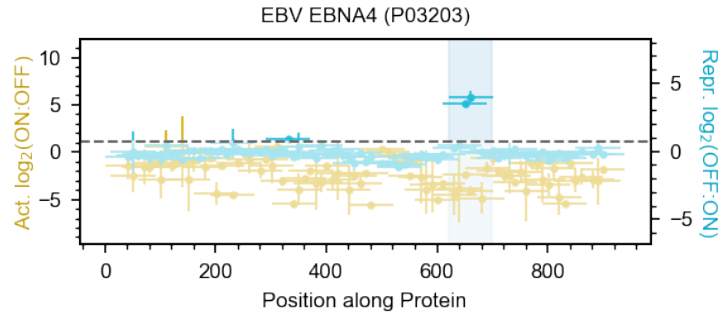

Extended repression domain from residues 611 to 700:

KQSRPPETAAPRQWPMLRPIPMRPLRMQPIPFNHPVGP TPHQTPQVEITPYKPTWAQIGHIPYQPTPTGPATMLLRQWAPATMQTPPRA

Max tile of repression domain from residues 621 to 700 (estimated 82.2% to 92.2% of cells repressed):

PRQWPMLRPIPMRPLRMQPIPFNHPVGP TPHQTPQVEITPYKPTWAQIGHIPYQPTPTGPATMLLRQWAPATMQTPPRA

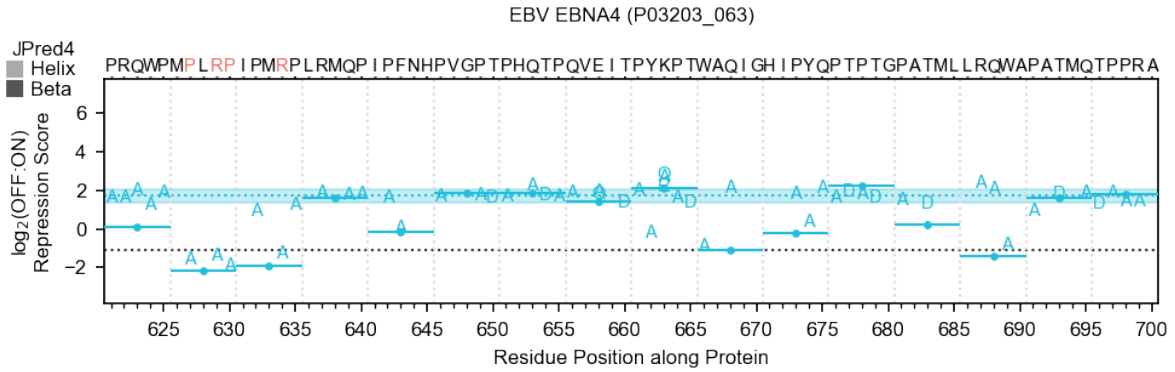

| Motif Name | Motif Start | Motif End | Motif Sequence | Overlaps Essential? | Essential Start | Essential End | Essential Sequence |
|------------|-------------|-----------|----------------|---------------------|-----------------|---------------|--------------------|
|            | -           | -         |                | No                  | 626             | 635           | MPLRPIPMRP         |
|            | -           | -         |                | No                  | 666             | 670           | WAQIG              |
|            | -           | -         |                | No                  | 686             | 690           | LRQWA              |
| WW_3       | 696         | 700       | TPPRA          | No                  | -               | -             |                    |

EBV EBNA4 (Q1HVG4)

Gene: BERF2A-BERF2B ; Protein Family: EBNA ; EBV Strain: AG876 (Type 2)

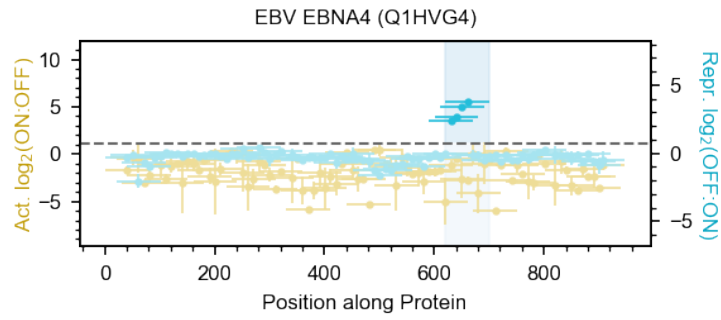

Extended repression domain from residues 591 to 700:

SHAQTPWPVTHPSQTPGGPTTQSLAPETEAPRQWPMLRPIPLHPLRMQPI SFNPAVRPTPHQPPQVEPTFYQSTWVKPPQQYQPQMGHIPYQPRPTGHSTMLRPQWAPT

Max tile of repression domain from residues 621 to 700 (estimated 83.6% to 86.3% of cells repressed):

PRQWPMLRPIPLHPLRMQPI SFNPAVRPTPHQPPQVEPTFYQSTWVKPPQQYQPQMGHIPYQPRPTGHSTMLRPQWAPT

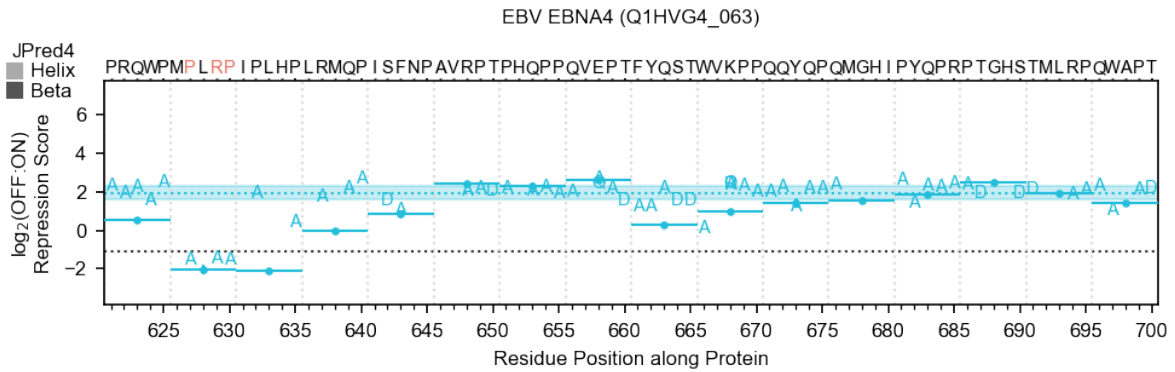

| Motif Name | Motif Start | Motif End | Motif Sequence | Overlaps Essential? | Essential Start | Essential End | Essential Sequence |
|------------|-------------|-----------|----------------|---------------------|-----------------|---------------|--------------------|
|            | -           | -         |                | No                  | 626             | 635           | MPLRPIPLHP         |

EBV EBNA6 (P03204)

Gene: BERF3-BERF4 ; Protein Family: EBNA ; EBV Strain: B95-8 (Type 1)

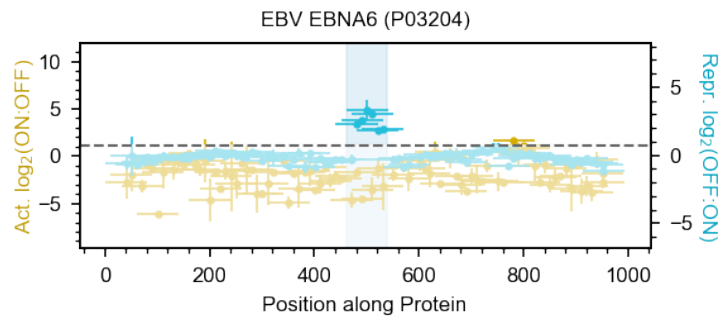

---

Extended repression domain from residues 441 to 570:

DKAEAQSTPERPGPSEQSSVTVEPAHPTPVEMPMVILHQPPPVPKVPVKPTPPPSRRRRGACVVYDDDIEVIDVETTEDSSSVSQPNKPHRKHQDG  
FQRSGRRQKRAAPPTVSPSDTGPPAVGPPAAG

Max tile of repression domain from residues 461 to 540 (estimated 59.5% to 88.4% of cells repressed):

TVEPAHPTPVEMPMVILHQPPPVPKVPVKPTPPPSRRRRGACVVYDDDIEVIDVETTEDSSSVSQPNKPHRKHQDGFQ

---

EBV EBNA6 (Q3KST0)

Gene: BERF3-BERF4 ; Protein Family: EBNA ; EBV Strain: GD1 (Type 1)

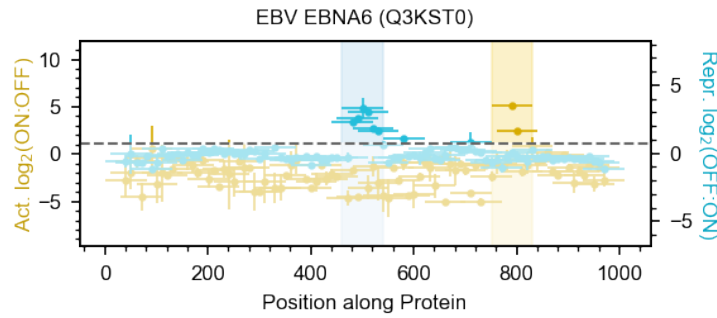

Extended repression domain from residues 441 to 570:

DKAEAQSTPERPGPSEQSSVTVEPAHPTPVEMPMVILHQPPPVPKVPVKPTPPPSRRRRGACVVYDDDIEVIDVETTEDSSSVSQPNKPHRKHQDGFQ  
 FQRSGRRQKRAAPPTVSPSDTGPPAAGPPAAG

Max tile of repression domain from residues 461 to 540 (estimated 59.5% to 88.4% of cells repressed):

TVEPAHPTPVEMPMVILHQPPPVPKVPVKPTPPPSRRRRGACVVYDDDIEVIDVETTEDSSSVSQPNKPHRKHQDGFQ

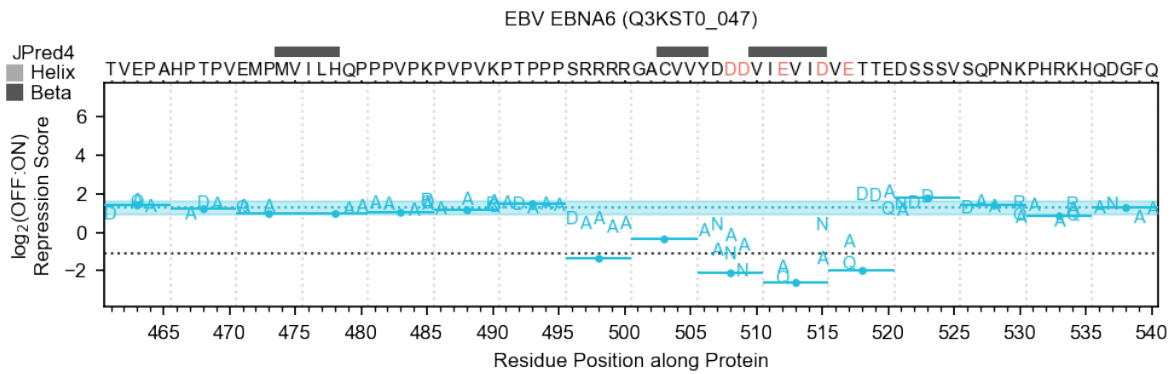

| Motif Name    | Motif Start | Motif End | Motif Sequence | Overlaps Essential? | Essential Start | Essential End | Essential Sequence |
|---------------|-------------|-----------|----------------|---------------------|-----------------|---------------|--------------------|
| CtBP_expanded | 469         | 473       | PVEMP          | No                  | -               | -             |                    |
| HP1           | 473         | 477       | PMVIL          | No                  | -               | -             |                    |
|               | -           | -         |                | No                  | 496             | 500           | SRRRR              |
| SUMO_SIM_par  | 512         | 524       | EVIDVETTEDSSS  | Yes                 | 506             | 520           | YDDDVIEVIDVETTE    |
| flexi_NRBOX   | 509         | 515       | DVIEVID        | Yes                 | 506             | 520           | YDDDVIEVIDVETTE    |
| SUMO_SIM_par  | 507         | 515       | DDDIEVID       | Yes                 | 506             | 520           | YDDDVIEVIDVETTE    |
| SUMO_SIM_anti | 507         | 515       | DDDIEVID       | Yes                 | 506             | 520           | YDDDVIEVIDVETTE    |

Extended activation domain from residues 751 to 840:

YQGYQEQPAPQAPYQGYQEPPQAPYQGYQEPPAHGLQSSYPGYAGPWTPRSQHPCYRHPWAPWSQDPVHGHTQG

Max tile of activation domain from residues 751 to 830 (estimated 34.6% to 37.2% of cells activated):

YQGYQEQPAPQAPYQGYQEPPQAPYQGYQEPPAHGLQSSYPGYAGPWTPRSQHPCYRHPWAPWS

EBV EBNA6 (Q69140)

Gene: BERF3-BERF4 ; Protein Family: EBNA ; EBV Strain: AG876 (Type 2)

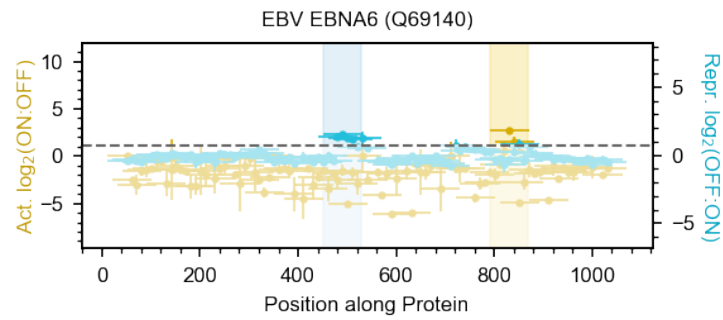

---

Extended repression domain from residues 441 to 550:

DEAEEAQSTPERPGPSKQPSEPVPAHTTPAGRSTVILHEPPREPEAVSFKPPPPSRRRRGACVVYDDDIIEVIDVETTEEETSMQRQPPLGQQPPPP  
VISTGSAMSS

Max tile of repression domain from residues 451 to 530 (estimated 25.8% to 37.2% of cells repressed):

ERPGPSKQPSEPVPAHTTPAGRSTVILHEPPREPEAVSFKPPPPSRRRRGACVVYDDDIIEVIDVETTEEETSMQRQ

---

Extended activation domain from residues 791 to 880:

EEPRPPQAPFVGDYGFVQIPSAQWEPHPSQGTYQGHIDPQLPAALDLGPEQPRFPQDPYVYSGGQLSSCPGYAGPWPSRPQHPRYRHTLA

Max tile of activation domain from residues 791 to 870 (estimated 6.0% to 8.5% of cells activated):

EEPRPPQAPFVGDYGFVQIPSAQWEPHPSQGTYQGHIDPQLPAALDLGPEQPRFPQDPYVYSGGQLSSCPGYAGPWPSRP

---

EBV EC-RF4 (P03235)

Gene: EC-RF4 ; Protein Family: EC-RF4

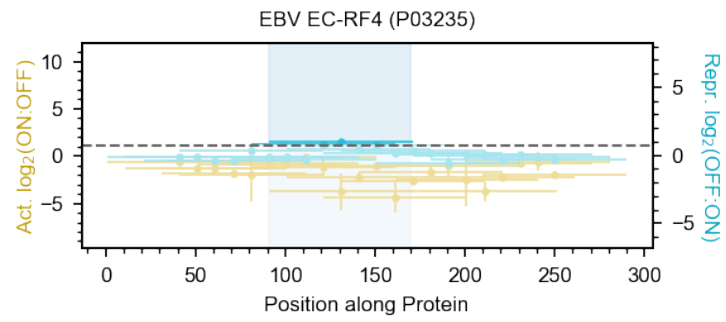

---

Extended repression domain from residues 81 to 170:

RQQDAPIAPGLLPCRPELAGYLQDQVSLVGGGRGEALLPQTLDIEGQGLVGGPGAVFTPDREVAHLTVVLELGVRVPVLEAGDGAAAAPVA

Max tile of repression domain from residues 91 to 170 (estimated 15.3% to 23.8% of cells repressed):

LLPCRPELAGYLQDQVSLVGGGRGEALLPQTLDIEGQGLVGGPGAVFTPDREVAHLTVVLELGVRVPVLEAGDGAAAAPVA

---



EBV ECP (P03220)

Gene: BGLF3 ; Protein Family: ECP

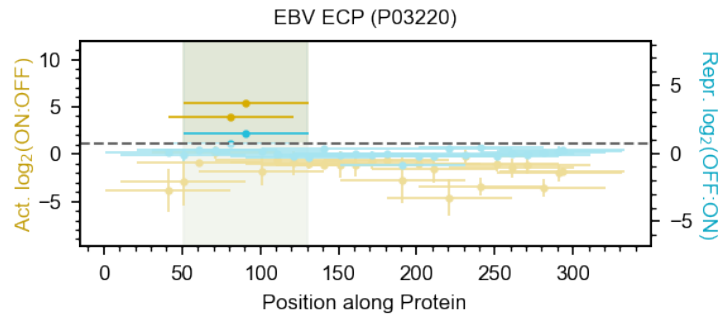

Extended repression domain from residues 41 to 130:

ETPLKSFLLVSNILPQDNRPWHEARSSGRVAEDDYDFSSLALELLPLNPRLPPEEWQFGGQGWSSRMPEPSQPPEMGMGLCFEVDGDLMRIA

Max tile of repression domain from residues 51 to 130 (estimated 25.5% to 31.9% of cells repressed):

SNILPQDNRPWHEARSSGRVAEDDYDFSSLALELLPLNPRLPPEEWQFGGQGWSSRMPEPSQPPEMGMGLCFEVDGDLMRIA

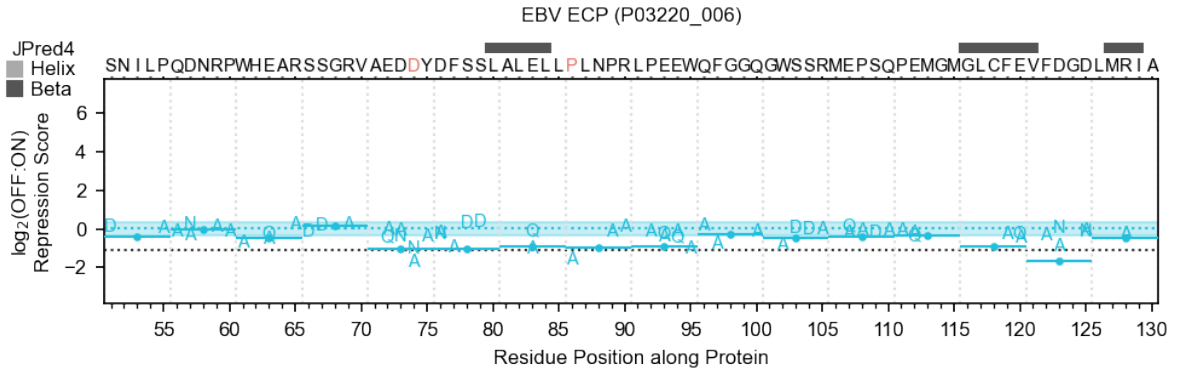

| Motif Name | Motif Start | Motif End | Motif Sequence | Overlaps Essential? | Essential Start | Essential End | Essential Sequence |
|------------|-------------|-----------|----------------|---------------------|-----------------|---------------|--------------------|
| -          | -           | -         |                | No                  | 121             | 125           | VFDGD              |

Extended activation domain from residues 41 to 130:

ETPLKSFLLVSNILPQDNRPWHEARSSGRVAEDDYDFSSLALELLPLNPRLPPEEWQFGGQGWSSRMPEPSQPPEMGMGLCFEVDGDLMRIA

Max tile of activation domain from residues 51 to 130 (estimated 41.2% to 43.4% of cells activated):

SNILPQDNRPWHEARSSGRVAEDDYDFSSLALELLPLNPRLPPEEWQFGGQGWSSRMPEPSQPPEMGMGLCFEVDGDLMRIA

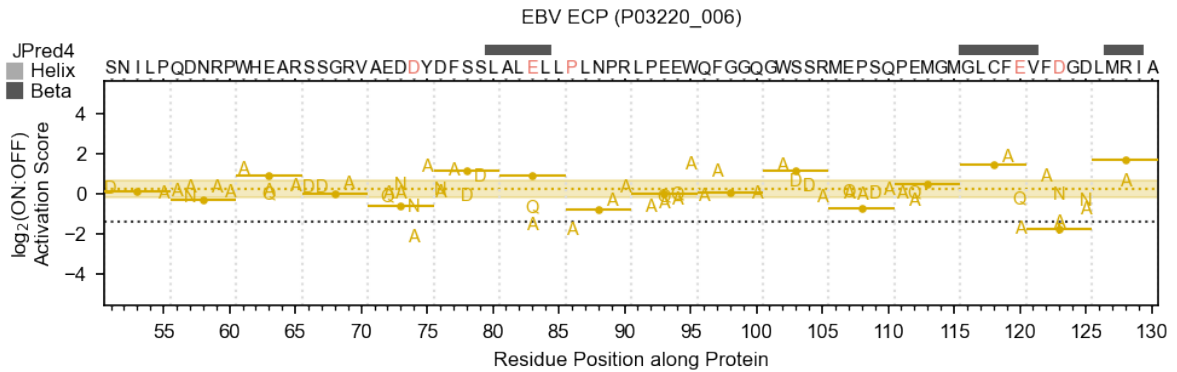

| Motif Name | Motif Start | Motif End | Motif Sequence | Overlaps Essential? | Essential Start | Essential End | Essential Sequence |
|------------|-------------|-----------|----------------|---------------------|-----------------|---------------|--------------------|
| -          | -           | -         |                | No                  | 121             | 125           | VFDGD              |

HCMV ECP (Q6SW48)

Gene: UL95 ; Protein Family: ECP

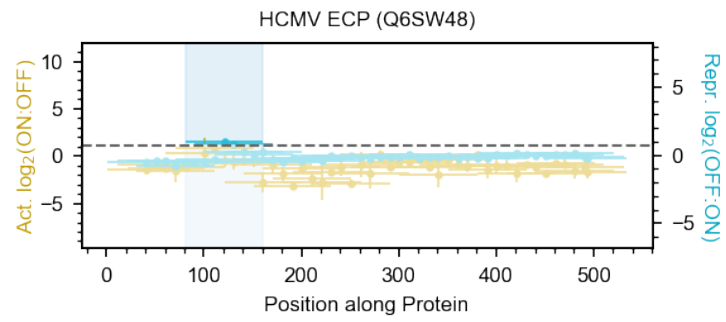

---

Extended repression domain from residues 81 to 170:

PSTAVRSPGSAGVSTSLCSVERMVLSAQSPAADFSVSEAWRFEEAVNMALVACEAVSPYDRFRLIETPDENFLLVTNVIPRESAEVPVL

Max tile of repression domain from residues 81 to 160 (estimated 18.2% to 20.2% of cells repressed):

PSTAVRSPGSAGVSTSLCSVERMVLSAQSPAADFSVSEAWRFEEAVNMALVACEAVSPYDRFRLIETPDENFLLVTNVI

---

HSV2 ECP (P89437)

Gene: UL14 ; Protein Family: ECP

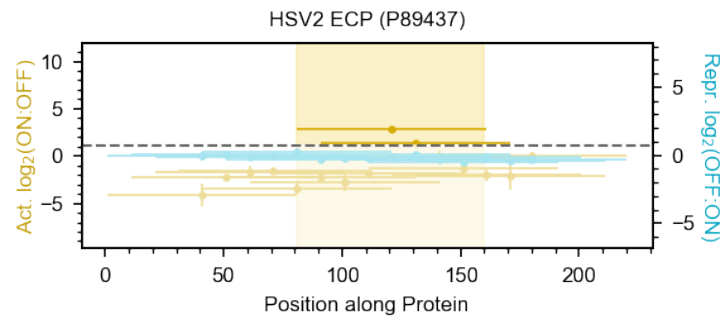

---

Extended activation domain from residues 81 to 170:

VEEQAARRDFLTAHRRYLDPALSERLDAADDRLADQEEQLEEEAANASLWGDGDLADGWMSPGDSDLLVMWQLTSAPKVHTDAPSRPGSR

Max tile of activation domain from residues 81 to 160 (estimated 6.8% to 7.7% of cells activated):

VEEQAARRDFLTAHRRYLDPALSERLDAADDRLADQEEQLEEEAANASLWGDGDLADGWMSPGDSDLLVMWQLTSAPKVH

---

VZV ECP (P09295)

Gene: ORF46 ; Protein Family: ECP

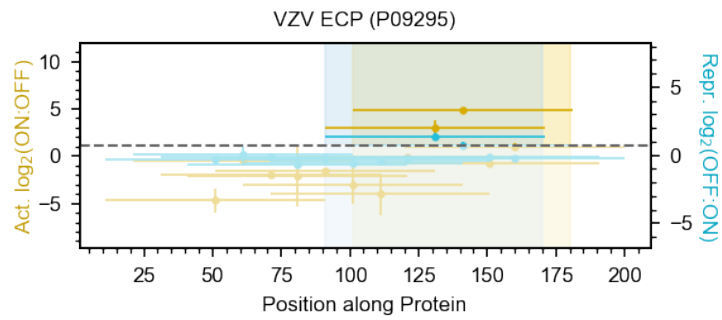

---

Extended repression domain from residues 91 to 180:

IQQILNTNRRYIAPDFIRGLDKTEDDNTDNIDRLEDAVGPNIENHTWFGEDDEALLTQWMLTTHPPTSKYLQLQDLCVPTTIPTDMNQ

Max tile of repression domain from residues 91 to 170 (estimated 20.7% to 34.3% of cells repressed):

IQQILNTNRRYIAPDFIRGLDKTEDDNTDNIDRLEDAVGPNIENHTWFGEDDEALLTQWMLTTHPPTSKYLQLQDLCV

---

Extended activation domain from residues 91 to 180:

IQQILNTNRRYIAPDFIRGLDKTEDDNTDNIDRLEDAVGPNIENHTWFGEDDEALLTQWMLTTHPPTSKYLQLQDLCVPTTIPTDMNQ

Max tile of activation domain from residues 101 to 180 (estimated 26.9% to 37.7% of cells activated):

YIAPDFIRGLDKTEDDNTDNIDRLEDAVGPNIENHTWFGEDDEALLTQWMLTTHPPTSKYLQLQDLCVPTTIPTDMNQ

---

HHV6B gB (P36320)

Gene: U39 ; Protein Family: gB

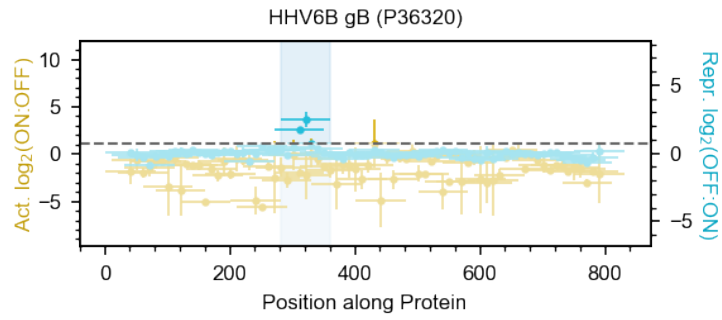

Extended repression domain from residues 271 to 370:

LEKGDTLFSWEIKEENESVCMLKHWTTVTHGLRAETDETYHFISKELTAAFVASKESLNLDPKQTCIKNEFEKIITDVYMSDYNDAYSMNGSYQIFKTT

Max tile of repression domain from residues 281 to 360 (estimated 42.2% to 70.6% of cells repressed):

EIKEENESVCMLKHWTTVTHGLRAETDETYHFISKELTAAFVASKESLNLDPKQTCIKNEFEKIITDVYMSDYNDAYSM

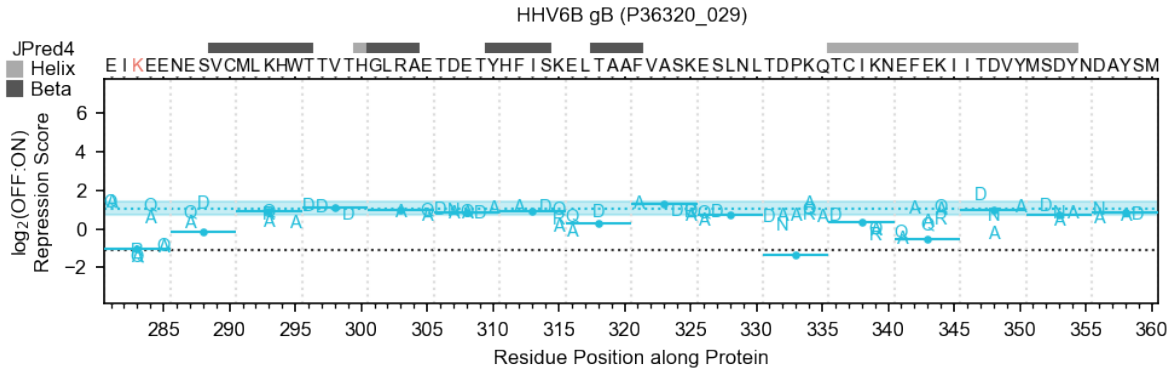

| Motif Name  | Motif Start | Motif End | Motif Sequence | Overlaps Essential? | Essential Start | Essential End | Essential Sequence |
|-------------|-------------|-----------|----------------|---------------------|-----------------|---------------|--------------------|
| SUMO_for    | 282         | 285       | IKEE           | No                  | -               | -             |                    |
| SUMO_rev    | 326         | 336       | ESLNLDPKQT     | Yes                 | 331             | 335           | TDPKQ              |
| SUMO_for    | 338         | 341       | IKNE           | No                  | -               | -             |                    |
| flexi_NRBOX | 341         | 347       | EFEKIIT        | No                  | -               | -             |                    |

HSV1 gB (P06437)

Gene: UL27 ; Protein Family: gB

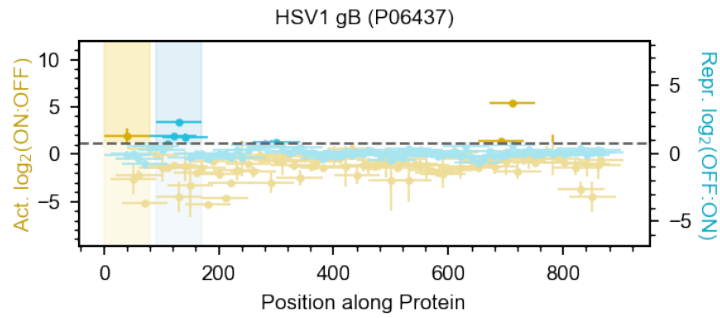

Extended activation domain from residues 1 to 80:

MHQGAPSWGRRWFVWVWALLGLTLGVLVASAAPTSPGTPGVAAATQAANGGPATPAPPPLGAAPTGDPKPKKKNKKPKNPTP

Max tile of activation domain from residues 1 to 80 (estimated 2.7% to 6.8% of cells activated):

MHQGAPSWGRRWFVWVWALLGLTLGVLVASAAPTSPGTPGVAAATQAANGGPATPAPPPLGAAPTGDPKPKKKNKKPKNPTP

Extended repression domain from residues 81 to 180:

PRPAGDNATVAAGHATLREHLRDIKAENTDANFYVCPPTGATVVQFEQPRRCPTRPEGQNYTEGIAVVFKENIAPYKFKATMYKDVTVSQVWFGHRY S

Max tile of repression domain from residues 91 to 170 (estimated 51.7% to 52.7% of cells repressed):

AAGHATLREHLRDIKAENTDANFYVCPPTGATVVQFEQPRRCPTRPEGQNYTEGIAVVFKENIAPYKFKATMYKDVTV

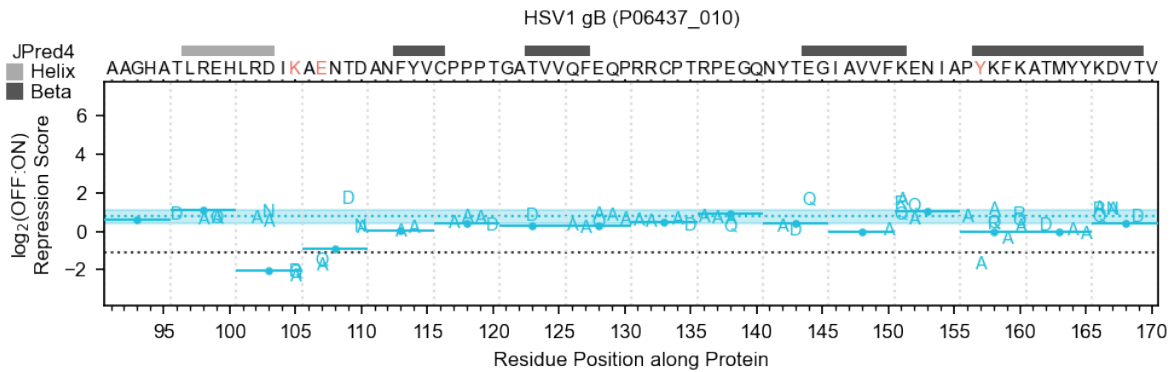

| Motif Name    | Motif Start | Motif End | Motif Sequence | Overlaps Essential? | Essential Start | Essential End | Essential Sequence |
|---------------|-------------|-----------|----------------|---------------------|-----------------|---------------|--------------------|
| SUMO_rev      | 99          | 106       | EHLRDIKA       | Yes                 | 101             | 105           | LRDIK              |
| SUMO_for      | 104         | 107       | IKAE           | Yes                 | 101             | 105           | LRDIK              |
| SUMO_SIM_anti | 143         | 150       | TEGIAVVF       | No                  | -               | -             |                    |
| flexi_NRBOX   | 145         | 151       | GIAVVF         | No                  | -               | -             |                    |

HSV2 gB (P06763)

Gene: UL27 ; Protein Family: gB

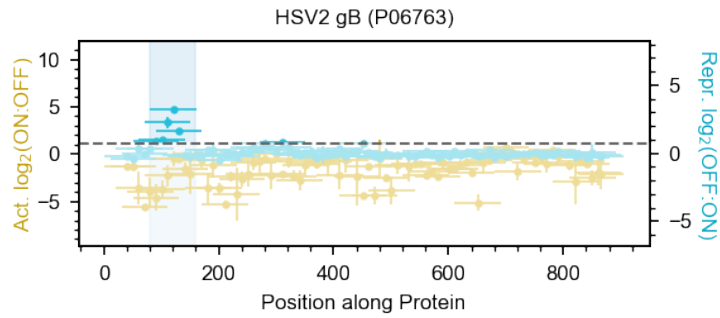

Extended repression domain from residues 51 to 170:

PPVSPATTKARKRKTKKPPKRPEATPPPDANATVAAGHATLRAHLREIKVENADAQFYVCPPTGATVVQFEQPRRCPTRPEGQNYTEGIAVVFKENIAPYKFKATMYKDVTVSQVWF

Max tile of repression domain from residues 81 to 160 (estimated 74.7% to 75.2% of cells repressed):

ANATVAAGHATLRAHLREIKVENADAQFYVCPPTGATVVQFEQPRRCPTRPEGQNYTEGIAVVFKENIAPYKFKATMY

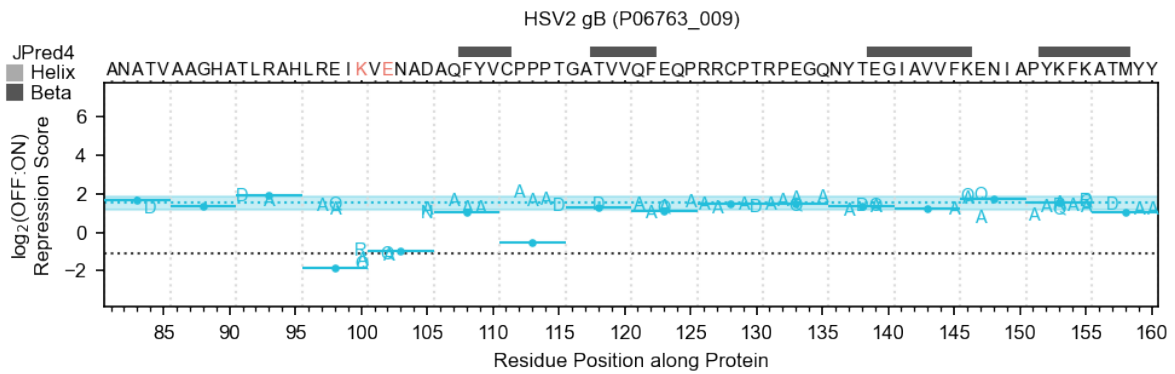

| Motif Name    | Motif Start | Motif End | Motif Sequence | Overlaps Essential? | Essential Start | Essential End | Essential Sequence |
|---------------|-------------|-----------|----------------|---------------------|-----------------|---------------|--------------------|
| SUMO_for      | 99          | 102       | IKVE           | Yes                 | 96              | 100           | LREIK              |
| SUMO_SIM_anti | 138         | 145       | TEGIAVVF       | No                  | -               | -             |                    |
| flexi_NRBOX   | 140         | 146       | GIAVVF         | No                  | -               | -             |                    |

HSV2 gB (P24994)

Gene: UL27 ; Protein Family: gB

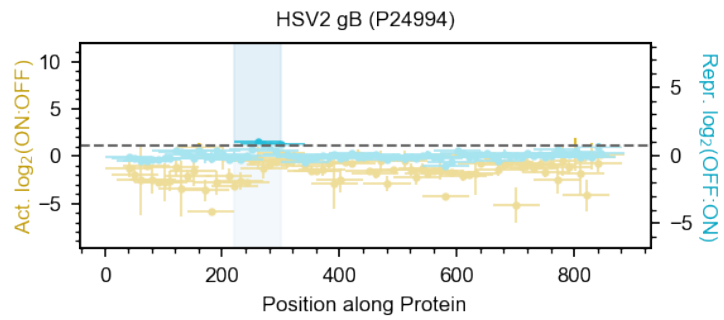

---

Extended repression domain from residues 221 to 310:

ATRTRSGWHTTDLKYNPARVEAFHRYGTTVNCIVEEVEARSVYPYDEFVLATGDFVYMSPFYGYRDGSHGEHTAYAADRFRQVDGYERD

Max tile of repression domain from residues 221 to 300 (estimated 15.7% to 21.4% of cells repressed):

ATRTRSGWHTTDLKYNPARVEAFHRYGTTVNCIVEEVEARSVYPYDEFVLATGDFVYMSPFYGYRDGSHGEHTAYAADR

---



KSHV gB (F5HB81)

Gene: ORF8 ; Protein Family: gB

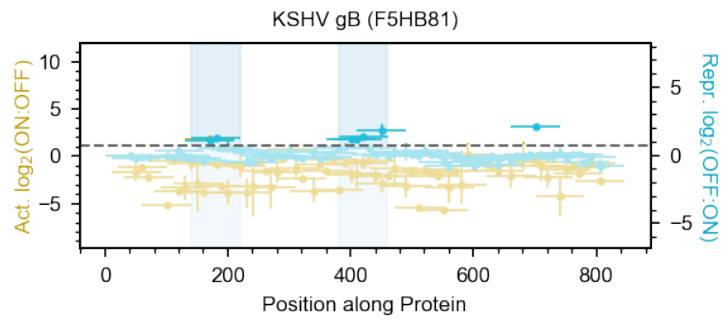

---

Extended repression domain from residues 131 to 220:

SAITNKYELPRPVPLYEISHMDSTYQCFSSMKVNVNGVENTFTDRDDVNTTVFLQPVEGLTDNIQRYFSQPVIYAEPGWFPGIYRVRTTV

Max tile of repression domain from residues 141 to 220 (estimated 23.6% to 24.7% of cells repressed):

RPVPLYEISHMDSTYQCFSSMKVNVNGVENTFTDRDDVNTTVFLQPVEGLTDNIQRYFSQPVIYAEPGWFPGIYRVRTTV

---

Extended repression domain from residues 361 to 460:

SCLTSDINTTLNASKAKLASTHVPNGTVQYFHTTGGLYLWQPMSAINLTHAQGDSGNPTSSPPPSASPMTTASARRKRRSASTAAAGGGGSTDNLSYT  
Q

Max tile of repression domain from residues 381 to 460 (estimated 25.7% to 28.0% of cells repressed):

THVPNGTVQYFHTTGGLYLWQPMSAINLTHAQGDSGNPTSSPPPSASPMTTASARRKRRSASTAAAGGGGSTDNLSYTQ

---

SuHV1 gB (P08355)

Gene: - ; Protein Family: gB

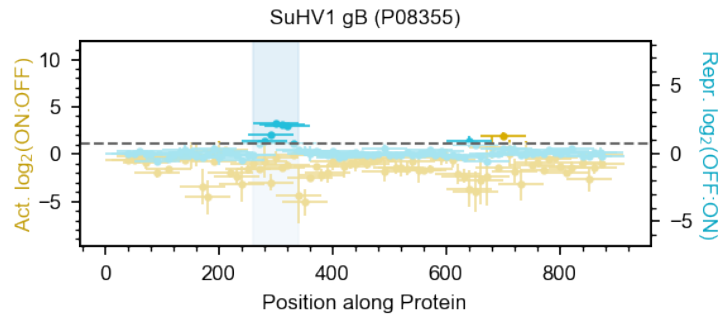

Extended repression domain from residues 231 to 370:

TAFDRDENPVEVDLRPSRLNALGTRGWHTTNDTYTKIGAAGFYHTGTSVNCIVEEVEARSVYPYDSFALSTGDIVYMSPFYGLREGAHGEHIGYAPGRFQQVEHYYPIDLDLSRLRASESVTRNFLRTPHFTVAWDWAPKT

Max tile of repression domain from residues 261 to 340 (estimated 47.3% to 50.7% of cells repressed):

NDTYTKIGAAGFYHTGTSVNCIVEEVEARSVYPYDSFALSTGDIVYMSPFYGLREGAHGEHIGYAPGRFQQVEHYYPIDL

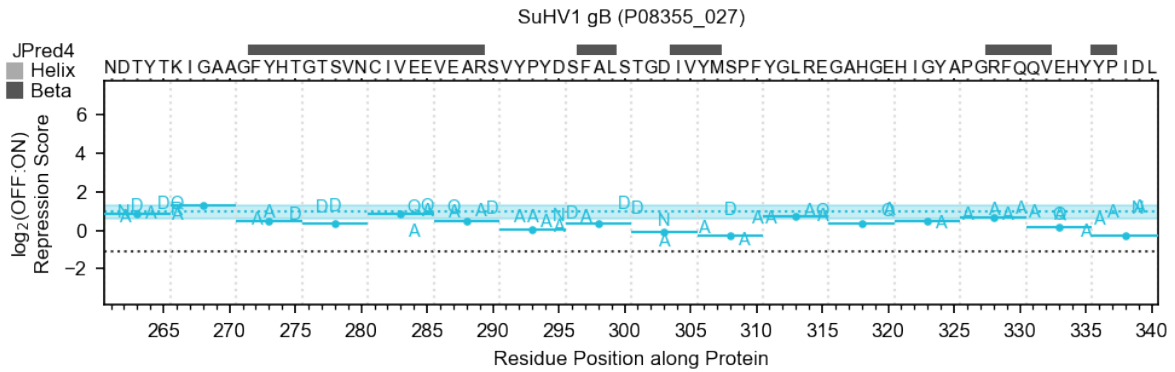

| Motif Name  | Motif Start | Motif End | Motif Sequence | Overlaps Essential? | Essential Start | Essential End | Essential Sequence |
|-------------|-------------|-----------|----------------|---------------------|-----------------|---------------|--------------------|
| flexi_NRBOX | 278         | 284       | SVNCIVE        | No                  | -               | -             |                    |

HSV1 gC (P10228)

Gene: UL44 ; Protein Family: gC

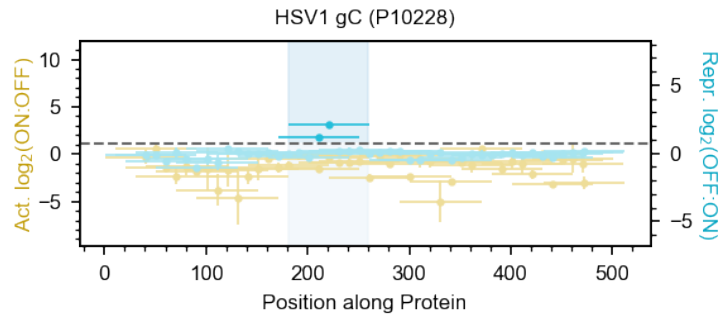

Extended repression domain from residues 171 to 260:

PAPDLEEVLTNITAPPGLLVYDSAPNLDPHVLWAEAGAGPGADPPLYSVTGPLPTQRLIIGEVTPATQGMYYLAWGRMDSPHEYGTVWR

Max tile of repression domain from residues 181 to 260 (estimated 44.5% to 46.6% of cells repressed):

NITAPPGLLVYDSAPNLDPHVLWAEAGAGPGADPPLYSVTGPLPTQRLIIGEVTPATQGMYYLAWGRMDSPHEYGTVWR

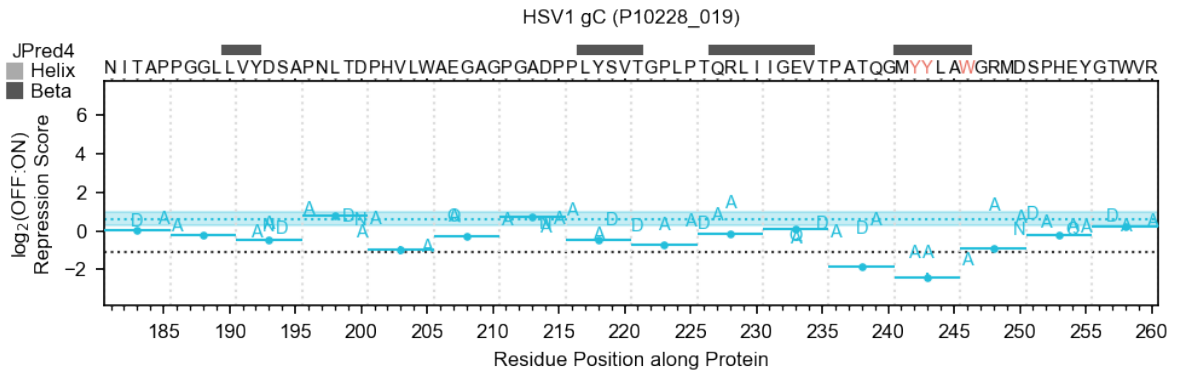

| Motif Name | Motif Start | Motif End | Motif Sequence | Overlaps Essential? | Essential Start | Essential End | Essential Sequence |
|------------|-------------|-----------|----------------|---------------------|-----------------|---------------|--------------------|
| WW_1       | 215         | 218       | PPLY           | No                  | -               | -             |                    |
|            | -           | -         |                | No                  | 236             | 245           | PATQGMYYLA         |

HSV2 gC (Q89730)

Gene: UL44 ; Protein Family: gC

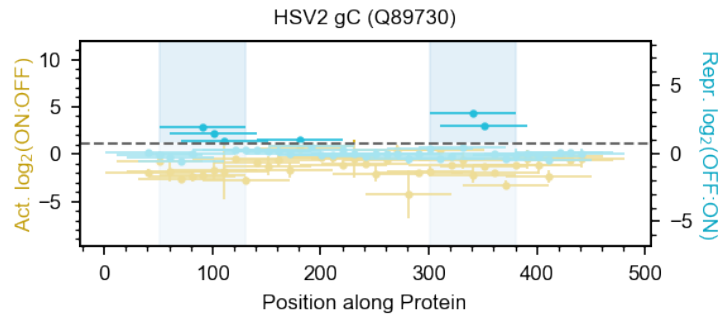

Extended repression domain from residues 51 to 150:

RNASAPRTTPTTPQPRKATKSKASTAKPAPPPKTGPPKTSSEPVRCNRHDPLARYGSRVQIRCFPNSTRTEFRLQIWRYATATDAEIGTAPSLEEVV  
N

Max tile of repression domain from residues 51 to 130 (estimated 35.8% to 45.4% of cells repressed):

RNASAPRTTPTTPQPRKATKSKASTAKPAPPPKTGPPKTSSEPVRCNRHDPLARYGSRVQIRCFPNSTRTEFRLQIWRY

Extended repression domain from residues 301 to 390:

TSAAVGGQGPRTFTCQLTWHRDSVSFSRRNASGTASVLPRTITMEFTGDHAVCTAGCVPEGVTFAWFLGDDSSPAEKVAVASQTSCGR

Max tile of repression domain from residues 301 to 380 (estimated 67.1% to 71.2% of cells repressed):

TSAAVGGQGPRTFTCQLTWHRDSVSFSRRNASGTASVLPRTITMEFTGDHAVCTAGCVPEGVTFAWFLGDDSSPAEKV

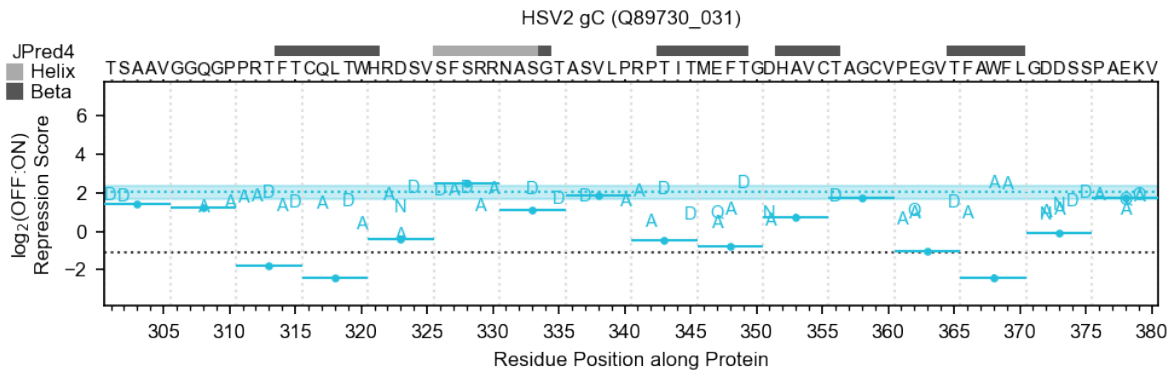

| Motif Name  | Motif Start | Motif End | Motif Sequence | Overlaps Essential? | Essential Start | Essential End | Essential Sequence |
|-------------|-------------|-----------|----------------|---------------------|-----------------|---------------|--------------------|
| WW_3        | 309         | 313       | GPPRT          | Yes                 | 311             | 320           | PRTFTCQLTW         |
| flexi_NRBOX | 365         | 371       | TFAWFLG        | Yes                 | 366             | 370           | FAWFL              |

SuHV1 gC (P06024)

Gene: - ; Protein Family: gC

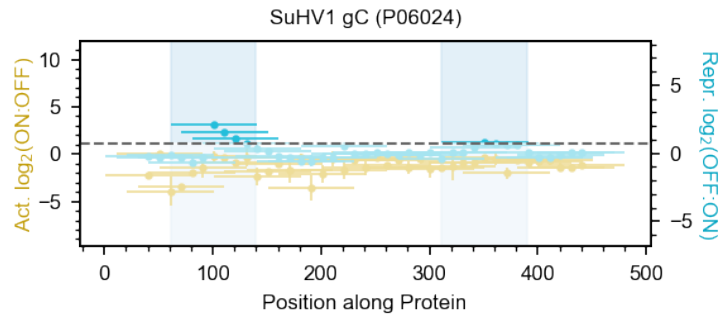

Extended repression domain from residues 61 to 160:

AGAVSTPPVPPPSVSRKPPRNNNRTRVHGDKATAHGRKRIVCRERLFSARVGDAVSFGCAVFPRAGETFEVRFYRRGRFRSPDADPEYFDEPPRPELPR

Max tile of repression domain from residues 61 to 140 (estimated 47.1% to 48.2% of cells repressed):

AGAVSTPPVPPPSVSRKPPRNNNRTRVHGDKATAHGRKRIVCRERLFSARVGDAVSFGCAVFPRAGETFEVRFYRRGRF

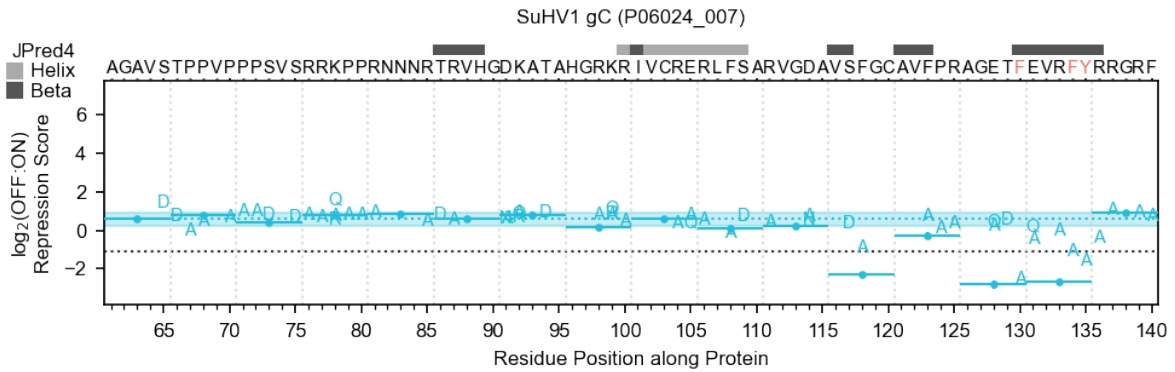

| Motif Name | Motif Start | Motif End | Motif Sequence | Overlaps Essential? | Essential Start | Essential End | Essential Sequence |
|------------|-------------|-----------|----------------|---------------------|-----------------|---------------|--------------------|
| WW_3       | 78          | 82        | KPPRN          | No                  | -               | -             |                    |
|            | -           | -         |                | No                  | 116             | 120           | VSFGC              |
|            | -           | -         |                | No                  | 126             | 135           | AGETFEVRFY         |

Extended repression domain from residues 311 to 400:

LAAADAADALAPSLRCEAVWYRDSVASQRFSEALRPHVYHPAAVSVRFVEGFAVCDGLCPPEARLAWSDHAADTVYHLGACAEHPGLLN

Max tile of repression domain from residues 311 to 390 (estimated 14.5% to 18.6% of cells repressed):

LAAADAADALAPSLRCEAVWYRDSVASQRFSEALRPHVYHPAAVSVRFVEGFAVCDGLCPPEARLAWSDHAADTVYHLG

VZV gC (P09256)

Gene: ORF14 ; Protein Family: gC

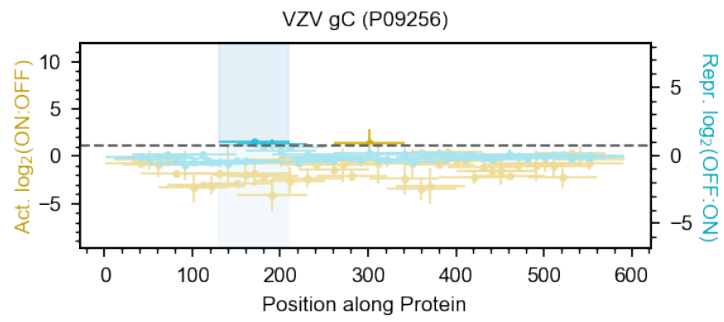

---

Extended repression domain from residues 131 to 230:

VAP TSAASRKPDPAVAP TSAATRKPDPAVAP TSAASRKPDPAANTQHSQPPFLYENIQCVHGGIQSIPYFHTFIMPCYMRLLTTGQQA AFKQQKTYEQY  
S

Max tile of repression domain from residues 131 to 210 (estimated 17.7% to 21.1% of cells repressed):

VAP TSAASRKPDPAVAP TSAATRKPDPAVAP TSAASRKPDPAANTQHSQPPFLYENIQCVHGGIQSIPYFHTFIMPCYMR

---

SuHV1 gD (P07645)

Gene: - ; Protein Family: gD

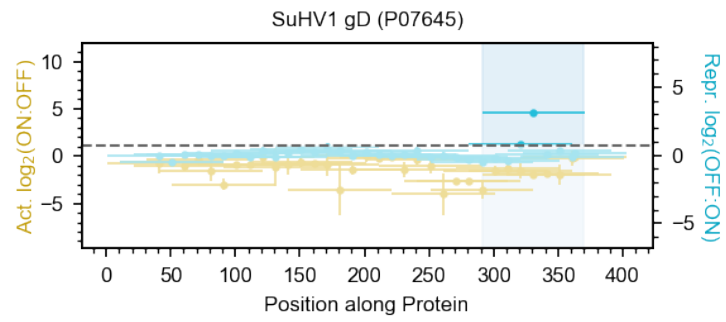

---

Extended repression domain from residues 281 to 370:

PEPAPATPAPPDRLPEPATRDHAAGGRPTPRPPRPETPHRPFAPPAVPSGWPQAEFPQRTPAAPGVSRRHSVIVGTGTAMGALLVGV

Max tile of repression domain from residues 291 to 370 (estimated 70.4% to 75.8% of cells repressed):

PDRLPEPATRDHAAGGRPTPRPPRPETPHRPFAPPAVPSGWPQAEFPQRTPAAPGVSRRHSVIVGTGTAMGALLVGV

---

VZV gE (Q9J3M8)

Gene: ORF68 ; Protein Family: gE

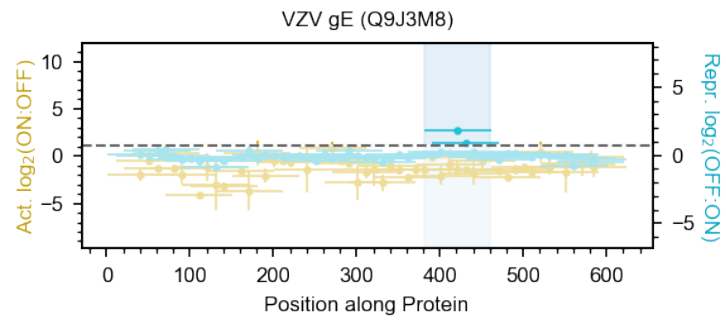

---

Extended repression domain from residues 381 to 470:

VPIDPTCQPMRLYSTCLYHPNAPQCLSHMNSGCTFTSPHLAQRVASTVYQNCHEADNYTAYCLGISHMEPSFGLILHDGGTTLKFVDTP

Max tile of repression domain from residues 381 to 460 (estimated 34.2% to 41.5% of cells repressed):

VPIDPTCQPMRLYSTCLYHPNAPQCLSHMNSGCTFTSPHLAQRVASTVYQNCHEADNYTAYCLGISHMEPSFGLILHDGG

---



HCMV gH (Q6SW67)

Gene: UL75 ; Protein Family: gH

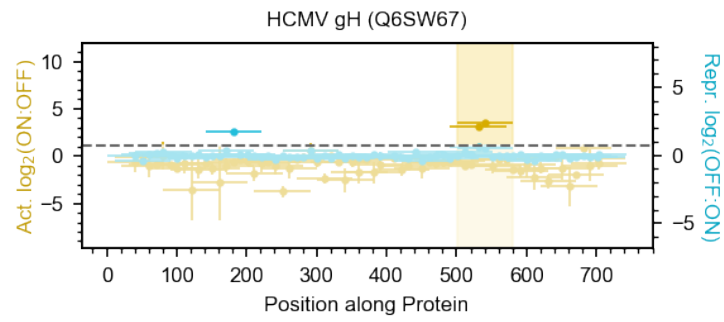

---

Extended activation domain from residues 491 to 580:

ETGLCSLAELSHFTQLLAHPHHEYLSLDLYPCSSSGRRDHSLERLTRLFPDATVPATVPAALSILSTMQPSTLETFPDLFCLPLGESFSA

Max tile of activation domain from residues 501 to 580 (estimated 9.7% to 15.8% of cells activated):

SHFTQLLAHPHHEYLSLDLYPCSSSGRRDHSLERLTRLFPDATVPATVPAALSILSTMQPSTLETFPDLFCLPLGESFSA

---

HHV6B gH (P68324)

Gene: U48 ; Protein Family: gH

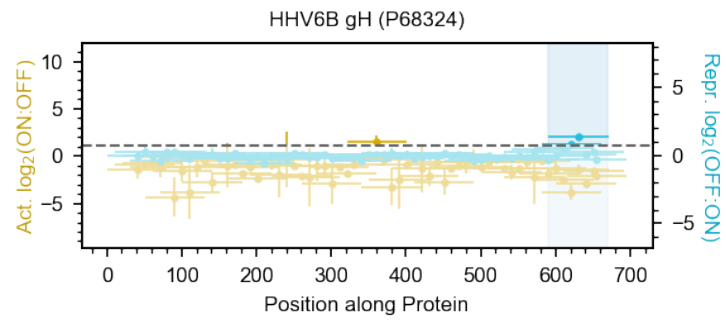

---

Extended repression domain from residues 581 to 670:

YKYAGQDLLVLRNISSQTCEFCQSVMEYDDIDGPLQYIYIKNIDELKLTDPNNLLVPNTRTHYLLAKNGSVFEMSEVGIDIDQVSI

Max tile of repression domain from residues 591 to 670 (estimated 26.7% to 28.2% of cells repressed):

LRNISSQTCEFCQSVMEYDDIDGPLQYIYIKNIDELKLTDPNNLLVPNTRTHYLLAKNGSVFEMSEVGIDIDQVSI

---

VZV gH (P09260)

Gene: ORF37 ; Protein Family: gH

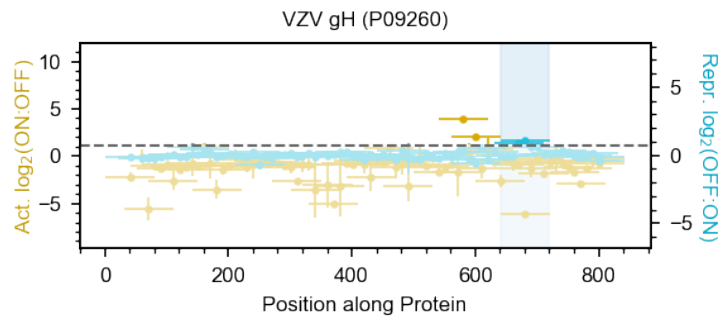

---

Extended repression domain from residues 631 to 720:

AKDLHILHTHVPEVFTQCDAARNGEYVLILPAVQGHSYVITRNKQQRGLVYSLADVVDVYNPISVVYLSRDTCVSEHGVIETVALPHPDN

Max tile of repression domain from residues 641 to 720 (estimated 17.2% to 25.2% of cells repressed):

VPEVFTQCDAARNGEYVLILPAVQGHSYVITRNKQQRGLVYSLADVVDVYNPISVVYLSRDTCVSEHGVIETVALPHPDN

---

HHV6B gO (P30005)

Gene: U47 ; Protein Family: gO

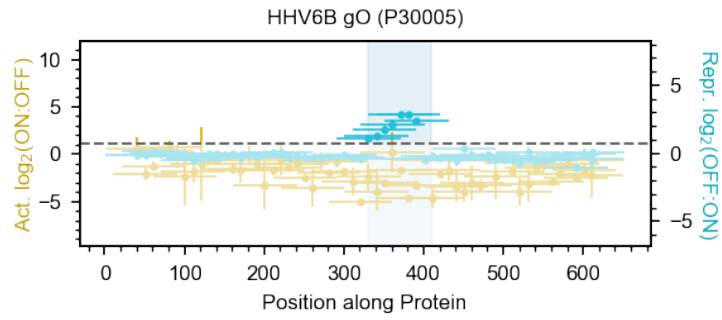

Extended repression domain from residues 291 to 430:

IPTPPEPPVTKNSTKLHTDIKVTPTNTPTITTQTTESIKKIVKRSDFFPRPMYTPTDIPTLTIRLNATIKTEQNTENPKSPPKPTNFENTTIRIPKTFESATVTTNATQKIESTTFTTIGIKEINGNTYSSPKNSIYLKSK

Max tile of repression domain from residues 331 to 410 (estimated 62.7% to 69.2% of cells repressed):

IVKRSDFFPRPMYTPTDIPTLTIRLNATIKTEQNTENPKSPPKPTNFENTTIRIPKTFESATVTTNATQKIESTTFTTIGI

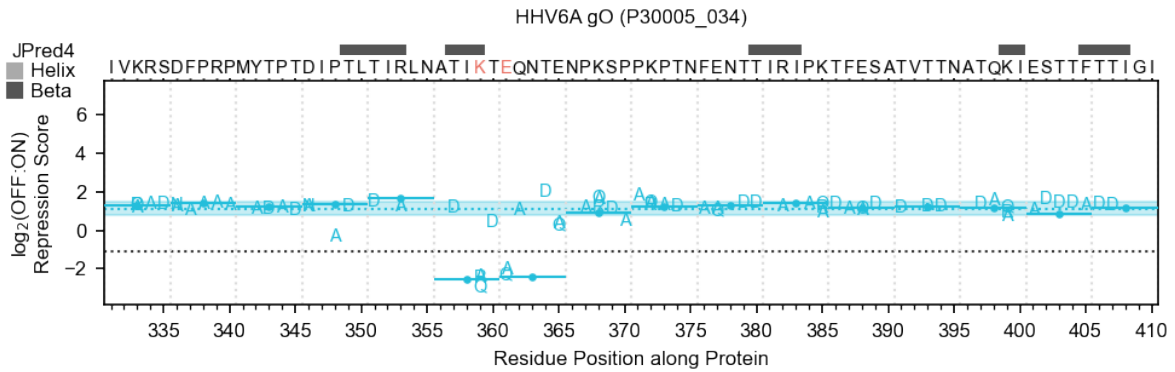

| Motif Name | Motif Start | Motif End | Motif Sequence | Overlaps Essential? | Essential Start | Essential End | Essential Sequence |
|------------|-------------|-----------|----------------|---------------------|-----------------|---------------|--------------------|
| SUMO_for   | 358         | 361       | IKTE           | Yes                 | 356             | 365           | ATIKTEQNTE         |

HHV6B gO (P52549)

Gene: U47 ; Protein Family: gO

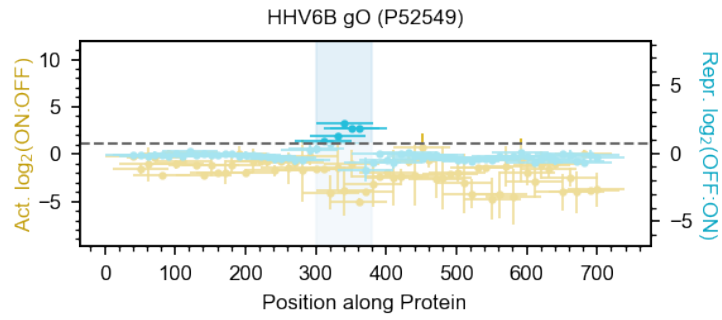

Extended repression domain from residues 271 to 400:

TKNFTELQTDTIKVTNPNTPTITAQTTESIKKVVKRSDFFRPMYTPDIPTLTIRR NATIKTEQNTENPTENPKSPPKPTNFENTTIRIPETFESTTVATNTTQKLESTTFATTIGIEEISDNIYSSPKNS

Max tile of repression domain from residues 301 to 380 (estimated 49.6% to 49.9% of cells repressed):

KVVKRSDFFRPMYTPDIPTLTIRR NATIKTEQNTENPTENPKSPPKPTNFENTTIRIPETFESTTVATNTTQKLESTTF

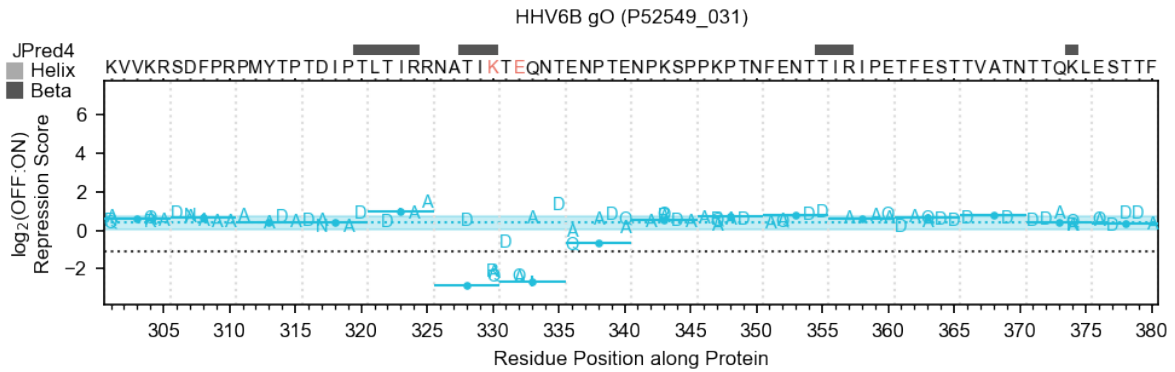

| Motif Name | Motif Start | Motif End | Motif Sequence | Overlaps Essential? | Essential Start | Essential End | Essential Sequence |
|------------|-------------|-----------|----------------|---------------------|-----------------|---------------|--------------------|
| SUMO_for   | 329         | 332       | IKTE           | Yes                 | 326             | 335           | NATIKTEQNT         |

EBV GP350 (P03200)

Gene: BLLF1 ; Protein Family: GP350

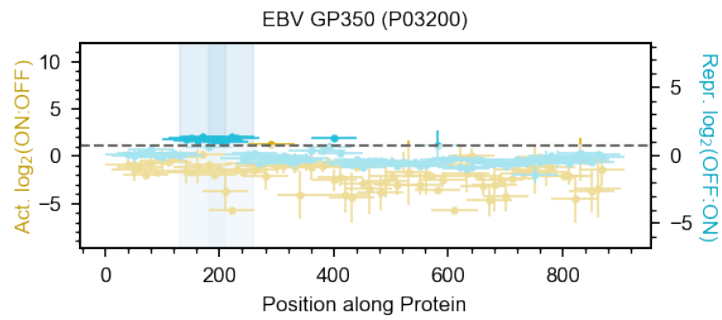

---

Extended repression domain from residues 101 to 210:

ELALTMRSKKLPINVTTGEEQQVSLESVDVYFQDVFGTMWCHHAEMQNPVYLIPETVPYIKWDNCNSTNITAVVRAQGLDVTLP LSLPTSAQDSNFSVKTEMLGNEIDIE

Max tile of repression domain from residues 131 to 210 (estimated 26.9% to 27.0% of cells repressed):

YFQDVFGTMWCHHAEMQNPVYLIPETVPYIKWDNCNSTNITAVVRAQGLDVTLP LSLPTSAQDSNFSVKTEMLGNEIDIE

---

Extended repression domain from residues 151 to 270:

YLIPETVPYIKWDNCNSTNITAVVRAQGLDVTLP LSLPTSAQDSNFSVKTEMLGNEIDIECIMEDGEISQVLPGDNKFNITCSGYESHVPSGGILTSTSPVATPIPGTYAYSLRLTPRP

Max tile of repression domain from residues 181 to 260 (estimated 22.1% to 30.9% of cells repressed):

VTLPLSLPTSAQDSNFSVKTEMLGNEIDIECIMEDGEISQVLPGDNKFNITCSGYESHVPSGGILTSTSPVATPIPGTY

---

EBV HELI (P03214)

Gene: BBLF4 ; Protein Family: HELI

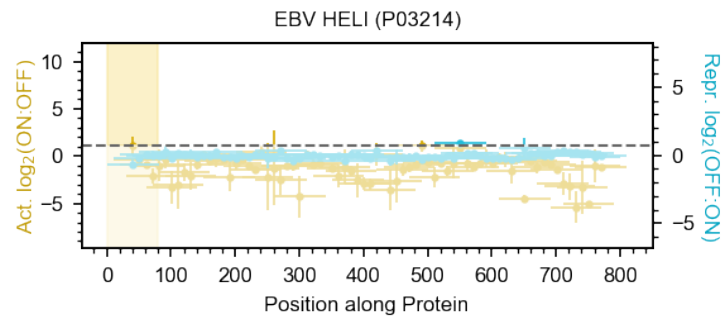

---

Extended activation domain from residues 1 to 80:

MAEEPRAPEALSSTFMLNMTSDASVRRIVRRIGTLARRRVQQLPDMETFSPEFDPELSEPPFLPFSAYVITGTAGAGKST

Max tile of activation domain from residues 1 to 80 (estimated 1.7% to 4.2% of cells activated):

MAEEPRAPEALSSTFMLNMTSDASVRRIVRRIGTLARRRVQQLPDMETFSPEFDPELSEPPFLPFSAYVITGTAGAGKST

---

HHV6B HELI (P52450)

Gene: U77 ; Protein Family: HELI

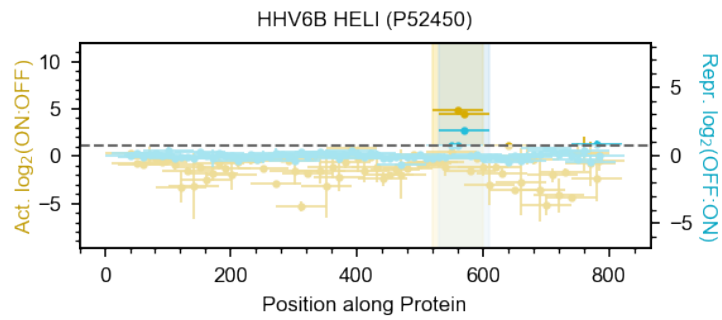

---

Extended activation domain from residues 521 to 610:

CSEFTTPEVLMEIKNIKMPSEIEFLESEMSRMSRDVQTVETDERYDFGLVDDGLSDMDLLEIDPCGDPFFTRYSKLPLTNSLSFEEISLLY

Max tile of activation domain from residues 521 to 600 (estimated 31.3% to 33.0% of cells activated):

CSEFTTPEVLMEIKNIKMPSEIEFLESEMSRMSRDVQTVETDERYDFGLVDDGLSDMDLLEIDPCGDPFFTRYSKLPLTNS

---

Extended repression domain from residues 511 to 610:

LMFGGMYSFCCSEFTTPEVLMEIKNIKMPSEIEFLESEMSRMSRDVQTVETDERYDFGLVDDGLSDMDLLEIDPCGDPFFTRYSKLPLTNSLSFEEISLLY

Max tile of repression domain from residues 531 to 610 (estimated 37.3% to 40.3% of cells repressed):

MEIKNIKMPSEIEFLESEMSRMSRDVQTVETDERYDFGLVDDGLSDMDLLEIDPCGDPFFTRYSKLPLTNSLSFEEISLLY

---



### HSV1 HELI (P10189)

Gene: UL5 ; Protein Family: HELI

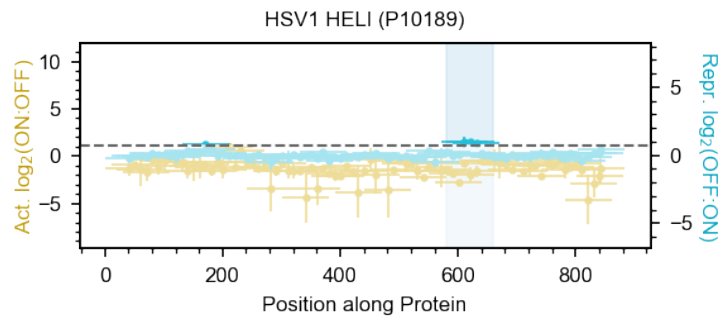

---

Extended repression domain from residues 571 to 670:

TLAYARMGELTAEILSLRPKSSGVPTQASVMADAGAPGERAFDFKQLGPRDGGPDDDFPDDDLVIFAGLDEQQLDVFYCHYTPGEPETTAAVHTQFALL  
K

Max tile of repression domain from residues 581 to 660 (estimated 17.8% to 20.5% of cells repressed):

TAEILSLRPKSSGVPTQASVMADAGAPGERAFDFKQLGPRDGGPDDDFPDDDLVIFAGLDEQQLDVFYCHYTPGEPETTA

---

HSV2 HELI (P28277)

Gene: UL5 ; Protein Family: HELI

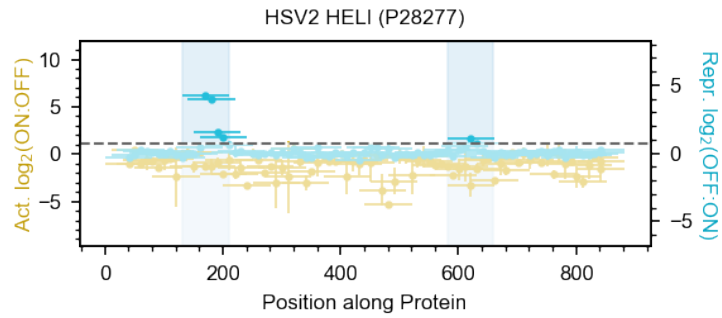

Extended repression domain from residues 131 to 240:

KLSGAFLSRPINTIFHEFGFRGNHVQAQLGQHPYTLASSPASLEDLQRRDLTYWVILDITKRALAAHGGEDARNEFHALTALEQTLGLGQGALTRLASV  
THGALPAFT

Max tile of repression domain from residues 131 to 210 (estimated 90.9% to 91.1% of cells repressed):

KLSGAFLSRPINTIFHEFGFRGNHVQAQLGQHPYTLASSPASLEDLQRRDLTYWVILDITKRALAAHGGEDARNEFHA

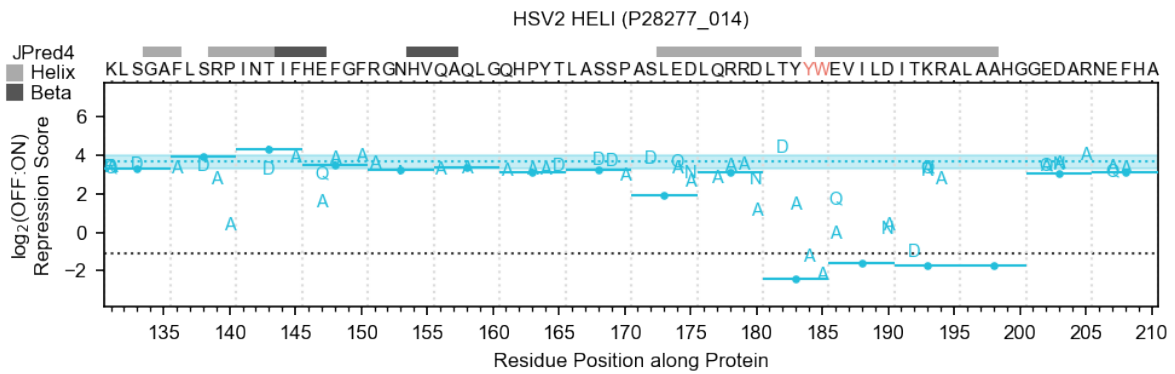

| Motif Name    | Motif Start | Motif End | Motif Sequence | Overlaps Essential? | Essential Start | Essential End | Essential Sequence |
|---------------|-------------|-----------|----------------|---------------------|-----------------|---------------|--------------------|
| CtBP_expanded | 170         | 174       | PASLE          | No                  | -               | -             |                    |
| flexi_NRBOX   | 184         | 190       | YWEVILD        | Yes                 | 181             | 200           | LTYWVILDITKRALAAHG |
| SUMO_SIM_par  | 186         | 192       | EVILDIT        | Yes                 | 181             | 200           | LTYWVILDITKRALAAHG |

Extended repression domain from residues 581 to 670:

AELLSLRRDAAGASATRAADTSRSPGERAFNFKHLGPRDGGPDDDFPDDDLVIFAGLDEQQLDVFYCHYALEEPETTAAVHAQFGLLKR

Max tile of repression domain from residues 581 to 660 (estimated 20.5% to 20.6% of cells repressed):

AELLSLRRDAAGASATRAADTSRSPGERAFNFKHLGPRDGGPDDDFPDDDLVIFAGLDEQQLDVFYCHYALEEPETTA

KSHV HELI (Q2HR89)

Gene: ORF44 ; Protein Family: HELI

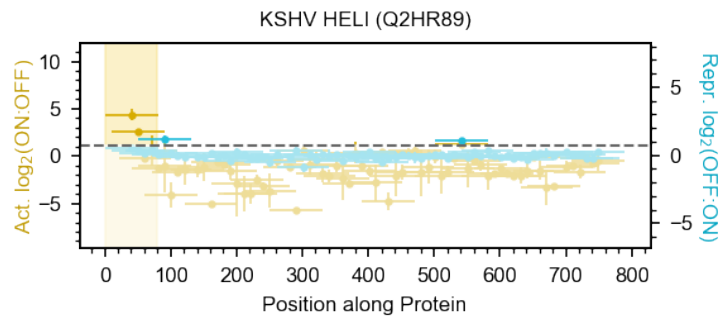

---

Extended activation domain from residues 1 to 90:

MDSSEGCTDMDEPSPGFILNMTSDAKVRSVVEQIDRLSNITTSPPEMGWYDLEFDPLEDEGPFLPFSAYVITGTAGAGKSTSVSALHQL

Max tile of activation domain from residues 1 to 80 (estimated 14.7% to 33.6% of cells activated):

MDSSEGCTDMDEPSPGFILNMTSDAKVRSVVEQIDRLSNITTSPPEMGWYDLEFDPLEDEGPFLPFSAYVITGTAGAGKS

---

HCMV HEPA (P16827)

Gene: UL102 ; Protein Family: HEPA

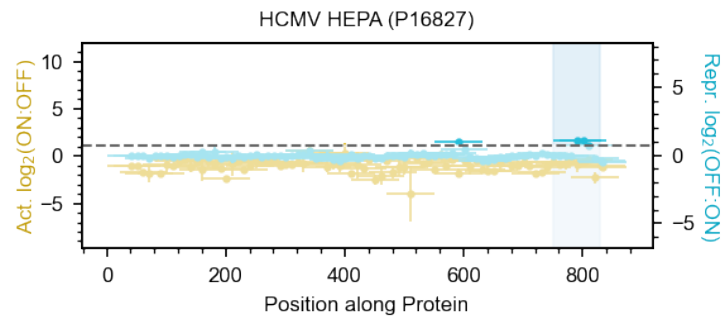

---

Extended repression domain from residues 751 to 850:

AEQGQIIVQSRDTALAADIGYGVYVDKAFAMLTACVEVWARELLSSSTASTTACSSSSVLSSALPSVTSSSSGTATVSPSCSSSSATWLEERDEWVRSL

Max tile of repression domain from residues 751 to 830 (estimated 18.7% to 23.5% of cells repressed):

AEQGQIIVQSRDTALAADIGYGVYVDKAFAMLTACVEVWARELLSSSTASTTACSSSSVLSSALPSVTSSSSGTATVSP

---

HSV1 HEPA (P10192)

Gene: UL8 ; Protein Family: HEPA

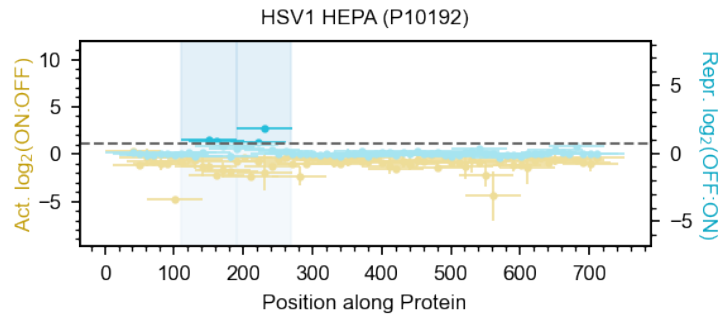

---

Extended repression domain from residues 111 to 200:

RQTGPVALFAPLRIGSDPRTGLVVKVERASWGPPAAPRAALLVAEANIDIDPMALAARVAEHPDARLAWARLAAIRDTPQCASAASLTVN

Max tile of repression domain from residues 111 to 190 (estimated 16.8% to 20.5% of cells repressed):

RQTGPVALFAPLRIGSDPRTGLVVKVERASWGPPAAPRAALLVAEANIDIDPMALAARVAEHPDARLAWARLAAIRDTPQ

---

Extended repression domain from residues 181 to 270:

RLAAIRDTPQCASAASLTVNITTGTALFAREYQTLAFPPIKKEGAFGDLVEVCEVGLRPRGHPQRVTARVLLPRDYDYFVSAGEKFSAPA

Max tile of repression domain from residues 191 to 270 (estimated 32.0% to 45.2% of cells repressed):

CASAASLTVNITTGTALFAREYQTLAFPPIKKEGAFGDLVEVCEVGLRPRGHPQRVTARVLLPRDYDYFVSAGEKFSAPA

---

KSHV HEPA (Q2HR92)

Gene: ORF40 ; Protein Family: HEPA

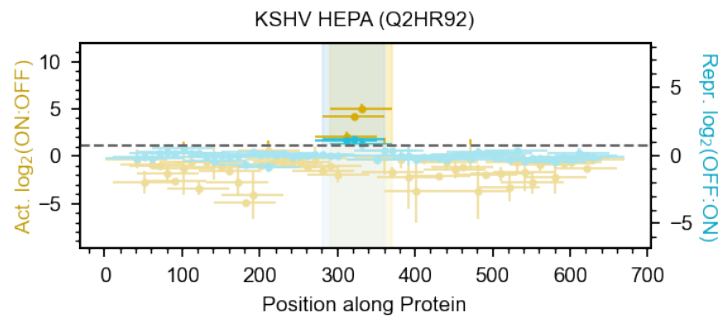

---

Extended repression domain from residues 271 to 370:

EEGTAFAPLLPAFPCIPRLRYGSPTSLDRASVQWDLFEPHILTHFDGIKRTSLADTVFGYDSLAISSRECEDQYVWPTPVTININLCTSDTMAIVREPSG

Max tile of repression domain from residues 281 to 360 (estimated 20.0% to 27.5% of cells repressed):

PAFPCIPRLRYGSPTSLDRASVQWDLFEPHILTHFDGIKRTSLADTVFGYDSLAISSRECEDQYVWPTPVTININLCTSD

---

Extended activation domain from residues 271 to 370:

EEGTAFAPLLPAFPCIPRLRYGSPTSLDRASVQWDLFEPHILTHFDGIKRTSLADTVFGYDSLAISSRECEDQYVWPTPVTININLCTSDTMAIVREPSG

Max tile of activation domain from residues 291 to 370 (estimated 26.8% to 45.0% of cells activated):

GSPTSLDRASVQWDLFEPHILTHFDGIKRTSLADTVFGYDSLAISSRECEDQYVWPTPVTININLCTSDTMAIVREPSG

---

VZV HEPA (Q9J3N6)

Gene: ORF52 ; Protein Family: HEPA

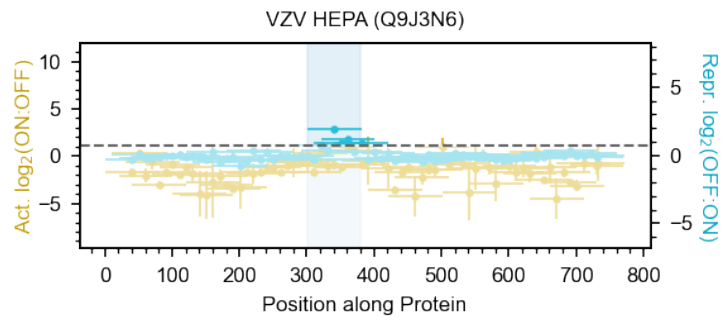

---

Extended repression domain from residues 301 to 400:

FAYLGPELNPKGEDRDYFCTVGFPGWTTTLRTQTPAVESIRTATEMYMETDGLWPVTGIQAFHYLAPWQHPPLPPRVQDLIGQIPQDTGHADATVNWD  
AG

Max tile of repression domain from residues 301 to 380 (estimated 39.5% to 41.3% of cells repressed):

FAYLGPELNPKGEDRDYFCTVGFPGWTTTLRTQTPAVESIRTATEMYMETDGLWPVTGIQAFHYLAPWQHPPLPPRVQDL

---

HCMV HHRF7 (P09708)

Gene: US32 ; Protein Family: HHRF7

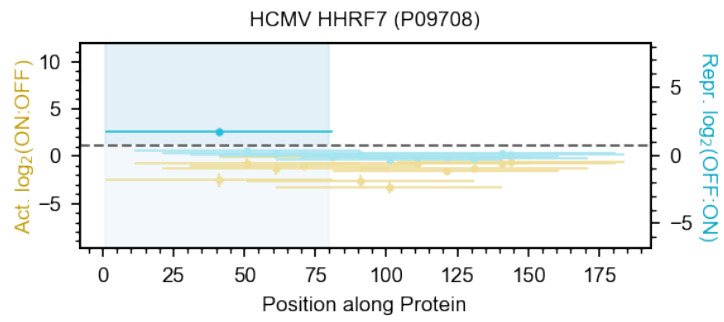

---

Extended repression domain from residues 1 to 80:

MAMYTSESERDWRRVIHDSHGLWCD CGDWREHLYCVYDSHFQRRPTTRAERRAANWRRQMRRLHRLWCFCQDWKCHALYA

Max tile of repression domain from residues 1 to 80 (estimated 33.7% to 40.0% of cells repressed):

MAMYTSESERDWRRVIHDSHGLWCD CGDWREHLYCVYDSHFQRRPTTRAERRAANWRRQMRRLHRLWCFCQDWKCHALYA

---



HCMV HKRFX (P09711)

Gene: J11 ; Protein Family: HKRFX

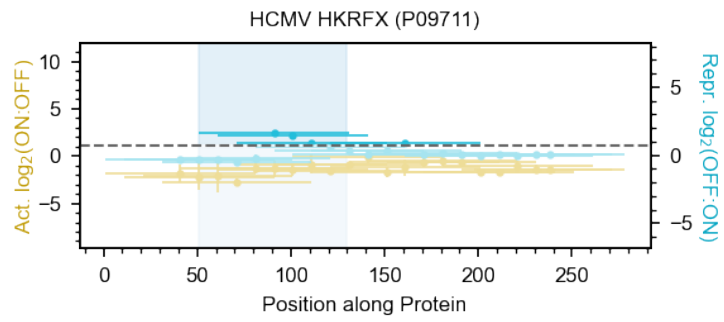

---

Extended repression domain from residues 51 to 150:

DTGKDRGTHRQRAETPSRSPVPTTNTVGRHAPAVRRQRRTQHAYGPQHSLEDPPRGPAPAVFWVCRGAAGWVCAGCVAGVCWVCRGCVGRVCQG  
VSRACA

Max tile of repression domain from residues 51 to 130 (estimated 31.2% to 39.2% of cells repressed):

DTGKDRGTHRQRAETPSRSPVPTTNTVGRHAPAVRRQRRTQHAYGPQHSLEDPPRGPAPAVFWVCRGAAGWVCAGCVAGV

---

HCMV HQLF3 (P09714)

Gene: US1 ; Protein Family: HQLF3

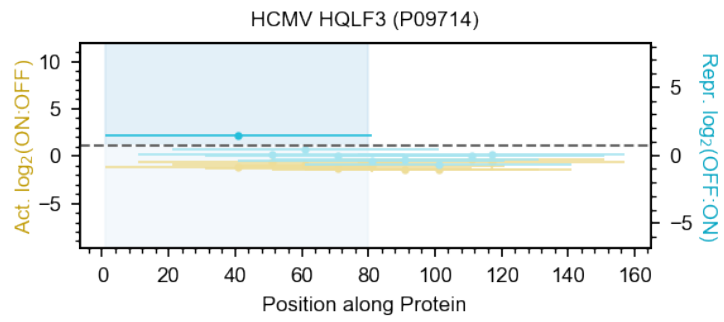

---

Extended repression domain from residues 1 to 80:

MASGLGDLSVGVSSLPRELAWRRVADDSHDLWCCCMDWKAHVEYAHPASELRPGSGGWPEHAEQWRQQVHAAHDVWCN

Max tile of repression domain from residues 1 to 80 (estimated 29.1% to 29.6% of cells repressed):

MASGLGDLSVGVSSLPRELAWRRVADDSHDLWCCCMDWKAHVEYAHPASELRPGSGGWPEHAEQWRQQVHAAHDVWCN

---

HSV1 ICP0 (P08393)

Gene: RL2 ; Protein Family: ICP0

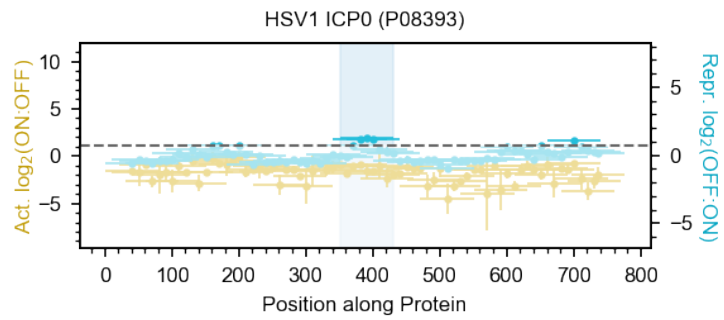

---

Extended repression domain from residues 331 to 440:

VGVVEAEAGRPRGRGTGPLVNRPAPLANNRDPDIVISDSPPASPHRPPAAPMPGSAPRPGPPASAAAASGPAPRAAVAPCVRAPPPGPGPRAPAPGAEPA  
ARPADARRVPQS

Max tile of repression domain from residues 351 to 430 (estimated 23.6% to 26.0% of cells repressed):

RPAPLANNRDPDIVISDSPPASPHRPPAAPMPGSAPRPGPPASAAAASGPAPRAAVAPCVRAPPPGPGPRAPAPGAEPAAR

---

HSV2 ICP0 (P28284)

Gene: RL2 ; Protein Family: ICP0

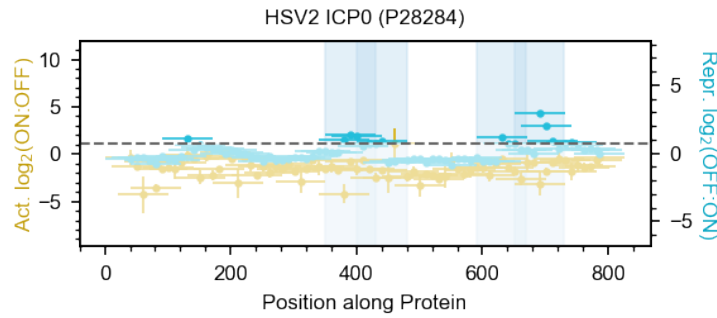

Extended repression domain from residues 341 to 440:

DAAAAEGRTPPARQPRAAQEPPIVISDPPPSPRRPPAGPGLSFVSSSSAQVSSGPGGGGLPQSSGRAARPRAAVAPRVRSPPRAAAAPVVSASADAA GP

Max tile of repression domain from residues 351 to 430 (estimated 27.6% to 28.5% of cells repressed):

PARQPRAAQEPPIVISDPPPSPRRPPAGPGLSFVSSSSAQVSSGPGGGGLPQSSGRAARPRAAVAPRVRSPPRAAAAPV

Extended repression domain from residues 381 to 480:

PLSFVSSSSAQVSSGPGGGGLPQSSGRAARPRAAVAPRVRSPPRAAAAPVVSASADAAGPAPPVPVDAHRAPRSRMTQAQTDQASLGRAGATD ARGS

Max tile of repression domain from residues 401 to 480 (estimated 16.5% to 18.3% of cells repressed):

LPQSSGRAARPRAAVAPRVRSPPRAAAAPVVSASADAAGPAPPVPVDAHRAPRSRMTQAQTDQASLGRAGATDARGS

Extended repression domain from residues 591 to 690:

SSSASSSSASSSSASSSSASSSSASSSSASSSSASSSAGGAGGSVASASGAGERRETS LGPRAAAPRGPRKCARKTRHAEGGPEPGARDPAPGLTRY LPI

Max tile of repression domain from residues 591 to 670 (estimated 21.2% to 25.8% of cells repressed):

SSSASSSSASSSSASSSSASSSSASSSSASSSSASSSAGGAGGSVASASGAGERRETS LGPRAAAPRGPRKCARKTRHAE

Extended repression domain from residues 651 to 750:

PRAAAPRGPRKCARKTRHAEGGPEPGARDPAPGLTRYLP IAGVSSVVALAPYVNKTVTGDCLPVLDMETGHIGAYVVLVDQ TGNVADLLRAAAPAWSR RT

Max tile of repression domain from residues 651 to 730 (estimated 68.8% to 70.6% of cells repressed):

PRAAAPRGPRKCARKTRHAEGGPEPGARDPAPGLTRYLP IAGVSSVVALAPYVNKTVTGDCLPVLDMETGHIGAYVVLVD

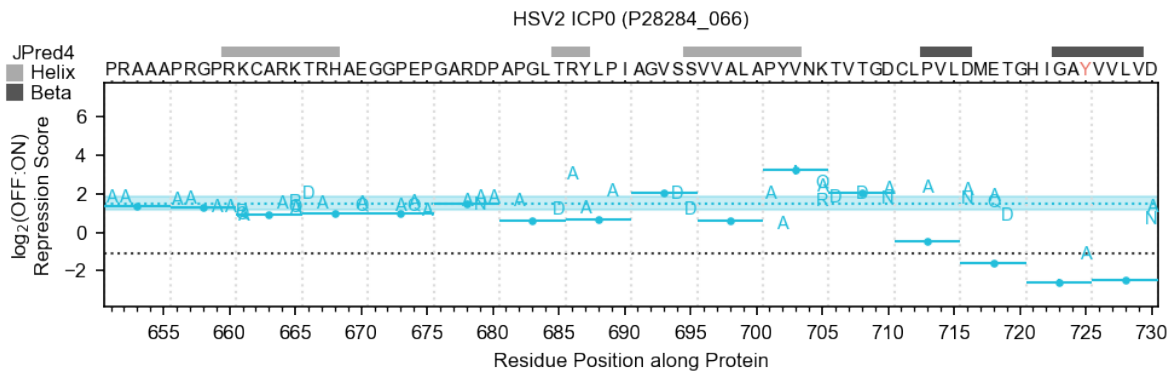

| Motif Name   | Motif Start | Motif End | Motif Sequence | Overlaps Essential? | Essential Start | Essential End | Essential Sequence |
|--------------|-------------|-----------|----------------|---------------------|-----------------|---------------|--------------------|
| flexi_NRBOX  | 692         | 698       | GVSSVVA        | No                  | -               | -             |                    |
| flexi_NRBOX  | 721         | 727       | HIGAYVV        | Yes                 | 716             | 730           | DMETGHIGAYVVLVD    |
| SUMO_SIM_par | 725         | 730       | YVVLVD         | Yes                 | 716             | 730           | DMETGHIGAYVVLVD    |

SuHV1 ICP0 (P29129)

Gene: EP0 ; Protein Family: ICP0

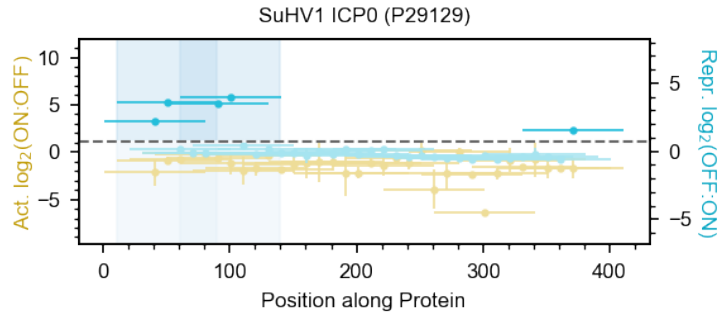

Extended repression domain from residues 1 to 90:

MGCTVSRRTTTAEASSAWGIFGFYRPRSPSPPPQRLSLPLTVMDCPICLDVAATEAQTLPCHMKFCLDCIQRWTLTSTACPLCNARVTS

Max tile of repression domain from residues 11 to 90 (estimated 81.2% to 83.6% of cells repressed):

TTAEASSAWGIFGFYRPRSPSPPPQRLSLPLTVMDCPICLDVAATEAQTLPCHMKFCLDCIQRWTLTSTACPLCNARVTS

Extended repression domain from residues 51 to 140:

DVAATEAQTLPCHMKFCLDCIQRWTLTSTACPLCNARVTSILHHVSDASFVETPVEGATDVDGEEDEPVGGGFAVIWGEDYTEEVRHEE

Max tile of repression domain from residues 61 to 140 (estimated 87.6% to 87.6% of cells repressed):

PCMCHKFCLDCIQRWTLTSTACPLCNARVTSILHHVSDASFVETPVEGATDVDGEEDEPVGGGFAVIWGEDYTEEVRHEE

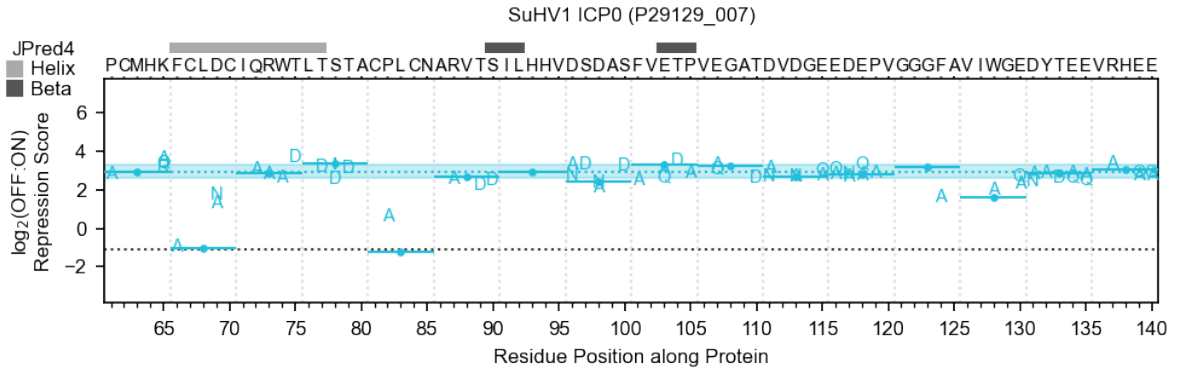

| Motif Name  | Motif Start | Motif End | Motif Sequence | Overlaps Essential? | Essential Start | Essential End | Essential Sequence |
|-------------|-------------|-----------|----------------|---------------------|-----------------|---------------|--------------------|
|             | -           | -         |                | No                  | 81              | 85            | CPLCN              |
| flexi_NRBOX | 87          | 93        | RVTSILH        | No                  | -               | -             |                    |

HSV1 ICP22 (P04485)

Gene: US1 ; Protein Family: ICP22

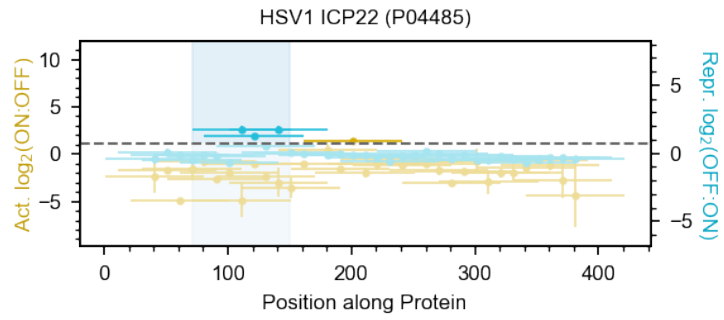

---

Extended repression domain from residues 71 to 160:

PRIGGRRAPRRLGGRFFLDMSAESTTGTETDASVSDDPDDTSDWSYDDIPPRPKRARVNLRLTSSPDRRDGVIFPKMGRVRSTRETQPRA

Max tile of repression domain from residues 71 to 150 (estimated 31.0% to 43.6% of cells repressed):

PRIGGRRAPRRLGGRFFLDMSAESTTGTETDASVSDDPDDTSDWSYDDIPPRPKRARVNLRLTSSPDRRDGVIFPKMGRV

---

HSV2 ICP22 (P14379)

Gene: US1 ; Protein Family: ICP22

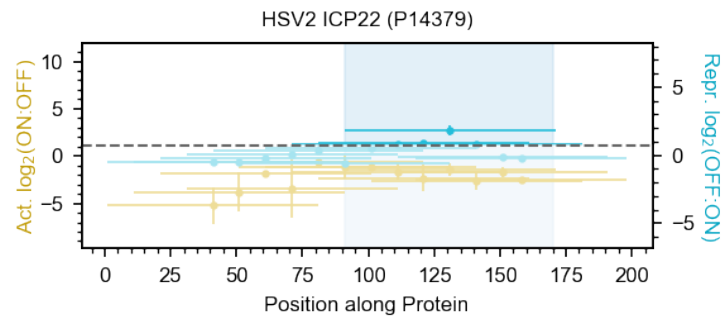

---

Extended repression domain from residues 71 to 180:

PPRELGGRYFLDLSAESTTGTSEGTGPSDDDDDDASDGWLVDTPPRKSQRPRINLRLTSSPDRRAGVVFPEVWRSRPIRAAQPAQSSGDRAH  
APRRSARQAMRS

Max tile of repression domain from residues 91 to 170 (estimated 28.6% to 50.0% of cells repressed):

TESEGTGPSDDDDDDASDGWLVDTPPRKSQRPRINLRLTSSPDRRAGVVFPEVWRSRPIRAAQPAQSSGDRAHAPR

---

HSV2 ICP22 (P89474)

Gene: US1 ; Protein Family: ICP22

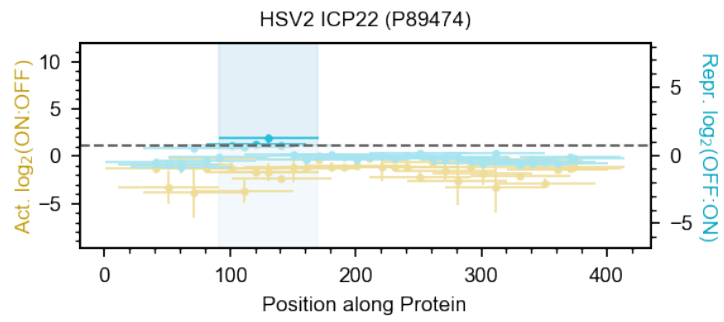

---

Extended repression domain from residues 81 to 180:

LDLSAESTTGTSEGTGPSDDDDDDASDGWLVDTPPRKSKRPRINLRLTSSPDRRAGVVFPEVWRSRPIRAAQQPAPASLPGIAHAHRRSARQAQMR  
SG

Max tile of repression domain from residues 91 to 170 (estimated 18.2% to 32.0% of cells repressed):

TESEGTGPSDDDDDDASDGWLVDTPPRKSKRPRINLRLTSSPDRRAGVVFPEVWRSRPIRAAQQPAPASLPGIAHAHRR

---



HSV1 ICP4 (P08392)

Gene: RS1 ; Protein Family: ICP4

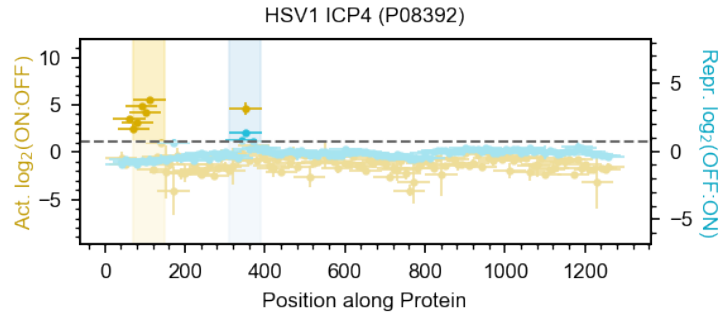

Extended activation domain from residues 21 to 150:

TPSPDRDERGALGWGAETEEGGDDPDHDPDHPDLDDARRDGRAPAAGTDAGEDAGDAVSPRQLALLASMVEEAVRTIPTDPAASPPRTPAFRADD  
DDGDEYDDAADAAGDRAPARGREREAPLRGAYP

Max tile of activation domain from residues 71 to 150 (estimated 39.1% to 49.6% of cells activated):

AGEDAGDAVSPRQLALLASMVEEAVRTIPTDPAASPPRTPAFRADDGDEYDDAADAAGDRAPARGREREAPLRGAYP

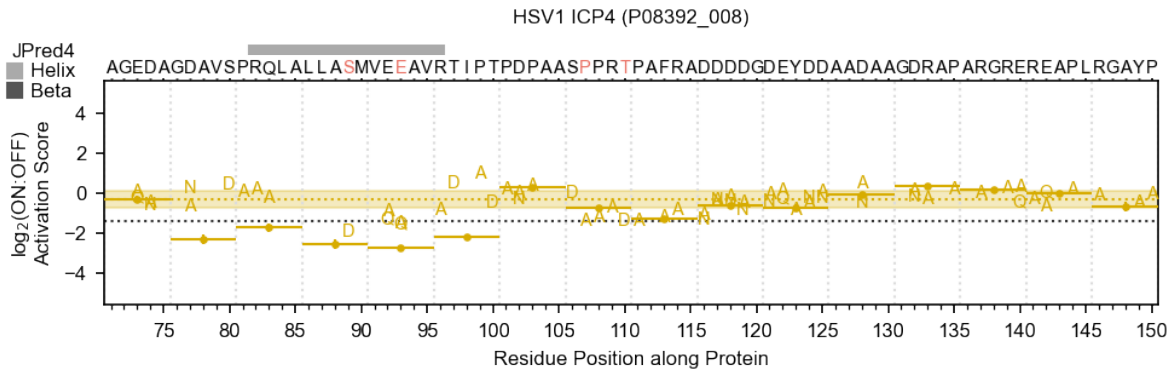

| Motif Name | Motif Start | Motif End | Motif Sequence | Overlaps Essential? | Essential Start | Essential End | Essential Sequence            |
|------------|-------------|-----------|----------------|---------------------|-----------------|---------------|-------------------------------|
|            | -           | -         |                | No                  | 76              | 100           | GDAVSPRQLALLASMVEEAV<br>RTIPT |
| WW_3       | 106         | 110       | SPPRT          | No                  | -               | -             |                               |

Extended repression domain from residues 301 to 390:

AFYARYRDGYVSGEPWPGAGPPPPGRVLYGGLGDSRPLWGAPAEAEARRRFEASGAPAAVWAPELGDAQQYALITRLLYTPDAEAMGW

Max tile of repression domain from residues 311 to 390 (estimated 25.0% to 27.9% of cells repressed):

VSGEPWPGAGPPPPGRVLYGGLGDSRPLWGAPAEAEARRRFEASGAPAAVWAPELGDAQQYALITRLLYTPDAEAMGW

HSV2 ICP4 (P90493)

Gene: RS1 ; Protein Family: ICP4

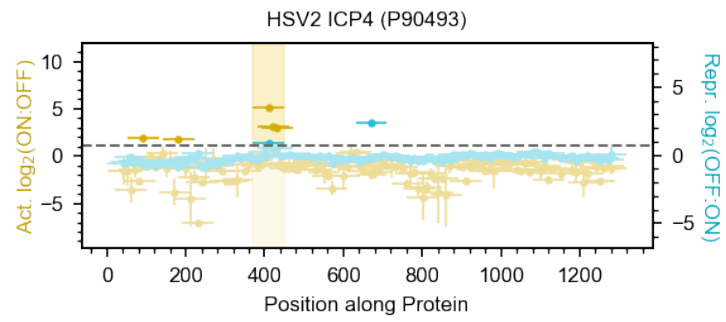

---

Extended activation domain from residues 371 to 470:

EPWPGAGPPPGRVLYGGLGDSRPGLWGAPEAEEARARFEASGAPAPVWAPELGDAQQYALITRLLYTPDAEAMGWLQNPRVAPGDVALDQACFRI  
SGA

Max tile of activation domain from residues 371 to 450 (estimated 33.3% to 39.7% of cells activated):

EPWPGAGPPPGRVLYGGLGDSRPGLWGAPEAEEARARFEASGAPAPVWAPELGDAQQYALITRLLYTPDAEAMGWLQN

---

SuHV1 ICP4 (P33479)

Gene: - ; Protein Family: ICP4

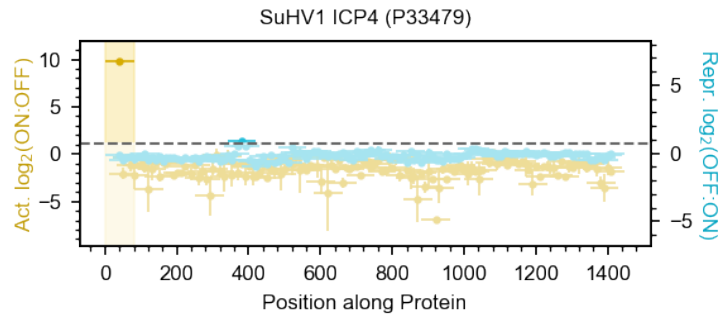

Extended activation domain from residues 1 to 80:

MADDLDFIETEGNFSQLLA AAAAAAEEEEGIASGPDGGSQGSRRRGSSGEDLLFGPGGLFSDDAAEAEAAVLAAAAGATRP

Max tile of activation domain from residues 1 to 80 (estimated 95.5% to 96.1% of cells activated):

MADDLDFIETEGNFSQLLA AAAAAAEEEEGIASGPDGGSQGSRRRGSSGEDLLFGPGGLFSDDAAEAEAAVLAAAAGATRP

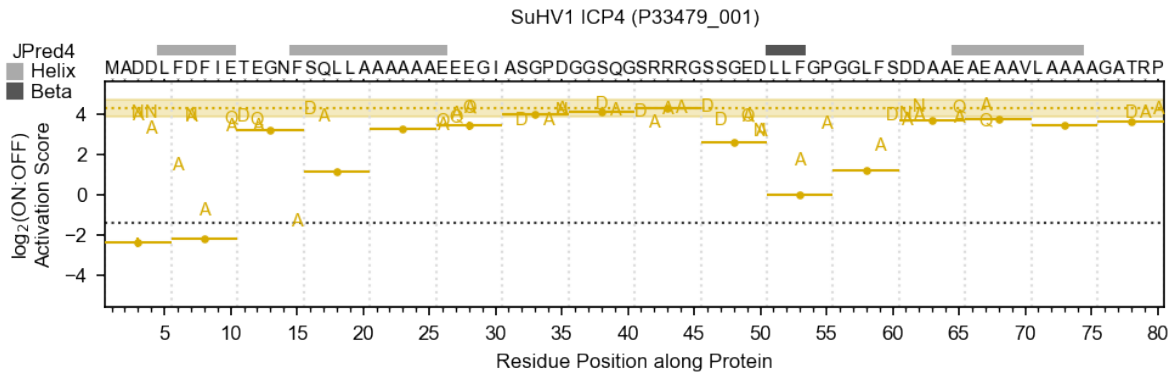

| Motif Name  | Motif Start | Motif End | Motif Sequence | Overlaps Essential? | Essential Start | Essential End | Essential Sequence |
|-------------|-------------|-----------|----------------|---------------------|-----------------|---------------|--------------------|
| flexi_NRBOX | 4           | 10        | DLFDIE         | Yes                 | 1               | 10            | MADDLDFIE          |
| flexi_NRBOX | 14          | 20        | NFSQLLA        | No                  | -               | -             |                    |

VZV ICP4 (P09310)

Gene: ORF62/ORF71 ; Protein Family: ICP4

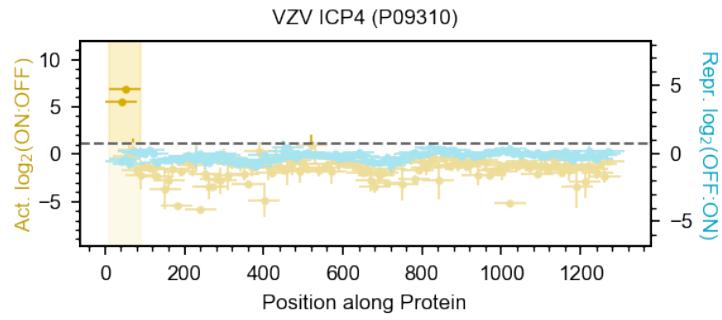

Extended activation domain from residues 1 to 90:

MDTPPMQRSTPQRAGSPDTLELMDLLDAAAAAAEHRARVVTSSQPDDLLFGENGVMVGREHEIVSIPSVSGLQPEPRTEDEVGEELTQDDY

Max tile of activation domain from residues 11 to 90 (estimated 71.5% to 74.3% of cells activated):

PQRAGSPDTLELMDLLDAAAAAAEHRARVVTSSQPDDLLFGENGVMVGREHEIVSIPSVSGLQPEPRTEDEVGEELTQDDY

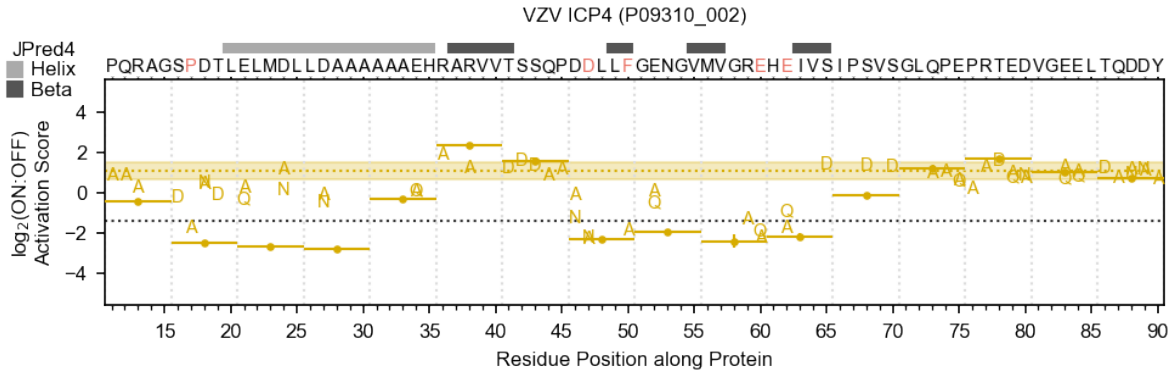

| Motif Name    | Motif Start | Motif End | Motif Sequence | Overlaps Essential? | Essential Start | Essential End | Essential Sequence   |
|---------------|-------------|-----------|----------------|---------------------|-----------------|---------------|----------------------|
| SUMO_SIM_anti | 18          | 24        | DTLELMD        | Yes                 | 16              | 30            | SPDTLELMDLLDAAA      |
| SUMO_SIM_par  | 18          | 24        | DTLELMD        | Yes                 | 16              | 30            | SPDTLELMDLLDAAA      |
| LIG_NRBOX     | 21          | 27        | ELMDLLD        | Yes                 | 16              | 30            | SPDTLELMDLLDAAA      |
| CtBP_expanded | 45          | 49        | PDDLL          | Yes                 | 46              | 65            | DDLLFGENGVMVGREHEIVS |
| SUMO_SIM_par  | 62          | 68        | EIVSIPS        | Yes                 | 46              | 65            | DDLLFGENGVMVGREHEIVS |

HCMV IE1 (P03169)

Gene: UL123 ; Protein Family: IE

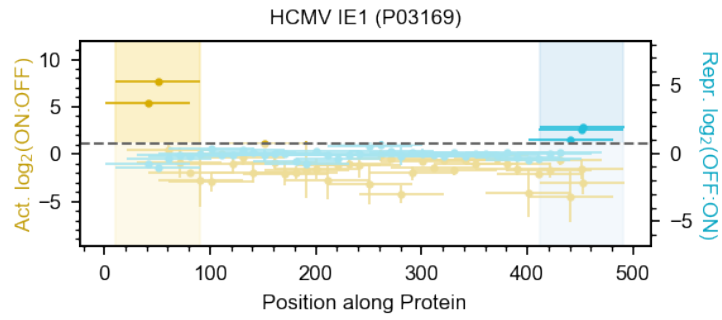

Extended activation domain from residues 1 to 90:

MESSAKRKMDPNPDEGPSSKVP RPETPVTKATTFLQTMLRKEVNSQLSLGDPLFP ELAEESLKT FERVTEDCNENPEKDVLAELVKQIK

Max tile of activation domain from residues 11 to 90 (estimated 83.3% to 84.5% of cells activated):

PDNPDEGPSSKVP RPETPVTKATTFLQTMLRKEVNSQLSLGDPLFP ELAEESLKT FERVTEDCNENPEKDVLAELVKQIK

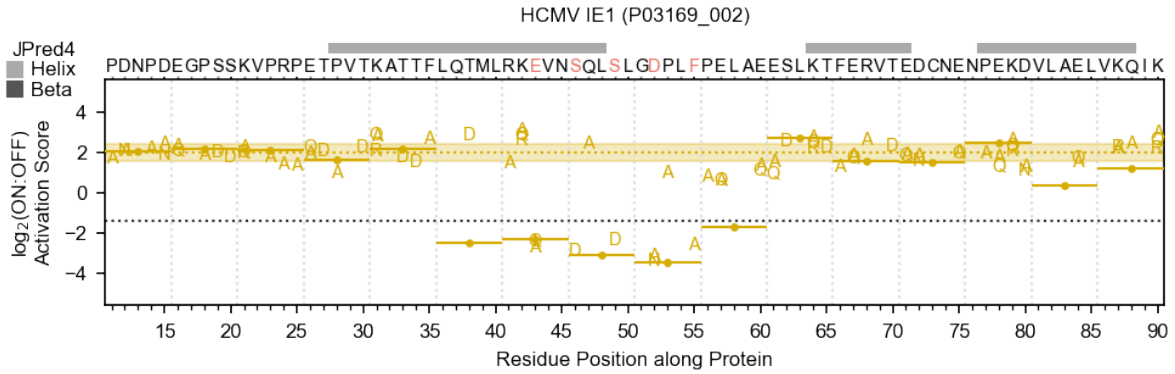

| Motif Name  | Motif Start | Motif End | Motif Sequence | Overlaps Essential? | Essential Start | Essential End | Essential Sequence            |
|-------------|-------------|-----------|----------------|---------------------|-----------------|---------------|-------------------------------|
|             | -           | -         |                | No                  | 36              | 60            | LQTMLRKEVNSQLSLGDPLFP<br>ELAE |
| flexi_NRBOX | 81          | 87        | VLAELVK        | No                  | -               | -             |                               |

Extended repression domain from residues 401 to 491:

VSPPEPVPATIP LSSVIVAENSDQE ESEQSDEEEEEGAQEEREDTVSVKSEPVSEIEEVAPEEEEEEDGAE EPTASGGKSTHPMVTRSKADQ

Max tile of repression domain from residues 412 to 491 (estimated 35.6% to 45.3% of cells repressed):

IPLSSVIVAENSDQE ESEQSDEEEEEGAQEEREDTVSVKSEPVSEIEEVAPEEEEEEDGAE EPTASGGKSTHPMVTRSKADQ

HHV6A IE1 (Q69567)

Gene: U90/U89 ; Protein Family: IE

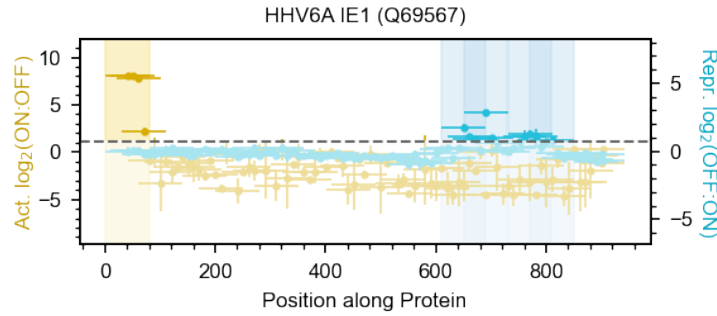

Extended activation domain from residues 1 to 110:

MEPAKPSGNNMGSNNDERMQDYRPDPMMEEISIKEILEESLMCDTSFDDLII PGLSEFGLIIPESNNIESNNVEEGSDGELKTLAAQSAGNCIQSIGASVKA  
AMKQEQSDM

Max tile of activation domain from residues 1 to 80 (estimated 87.1% to 88.9% of cells activated):

MEPAKPSGNNMGSNNDERMQDYRPDPMMEEISIKEILEESLMCDTSFDDLII PGLSEFGLIIPESNNIESNNVEEGSDGEL

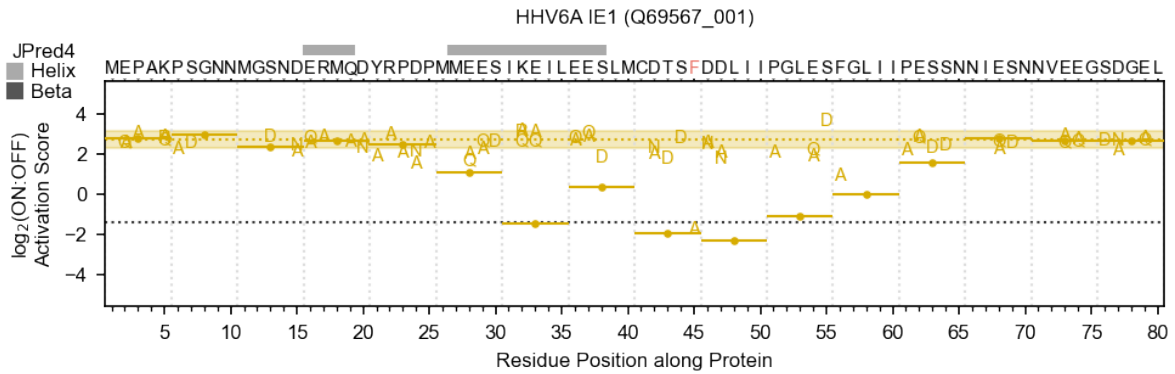

| Motif Name  | Motif Start | Motif End | Motif Sequence | Overlaps Essential? | Essential Start | Essential End | Essential Sequence |
|-------------|-------------|-----------|----------------|---------------------|-----------------|---------------|--------------------|
| flexi_NRBOX | 30          | 36        | SIKEILE        | Yes                 | 31              | 35            | IKEIL              |
| flexi_NRBOX | 44          | 50        | SFDDLII        | Yes                 | 41              | 50            | CDTSFDDLII         |

Extended repression domain from residues 611 to 710:

VAKRKHVSSKSPKNNKIKTDQLPKAADVIVISSESEDEEDGDNIIIGNSILIKAIKSESDSESSSESNDCTSEHKQLHLSYDEVNTNNGHCPSYGFPTPVF

Max tile of repression domain from residues 611 to 690 (estimated 30.2% to 43.8% of cells repressed):

VAKRKHVSSKSPKNNKIKTDQLPKAADVIVISSESEDEEDGDNIIIGNSILIKAIKSESDSESSSESNDCTSEHKQLHLS

Extended repression domain from residues 651 to 740:

GDNIIGNSILIKAIKSESDSESSSESNDCTSEHKQLHLSYDEVNTNNGHCPSYGFPTPVFTIPIRSMQGTGGIKSKFIPKKNWIWYMKKT

Max tile of repression domain from residues 651 to 730 (estimated 61.7% to 69.0% of cells repressed):

GDNIIGNSILIKAIKSESDSESSSESNDCTSEHKQLHLSYDEVNTNNGHCPSYGFPTPVFTIPIRSMQGTGGIKSKFIPK

Herpesvirus Tiling and Perturbation Screen Data from Ludwig, C.H. et al. 2023

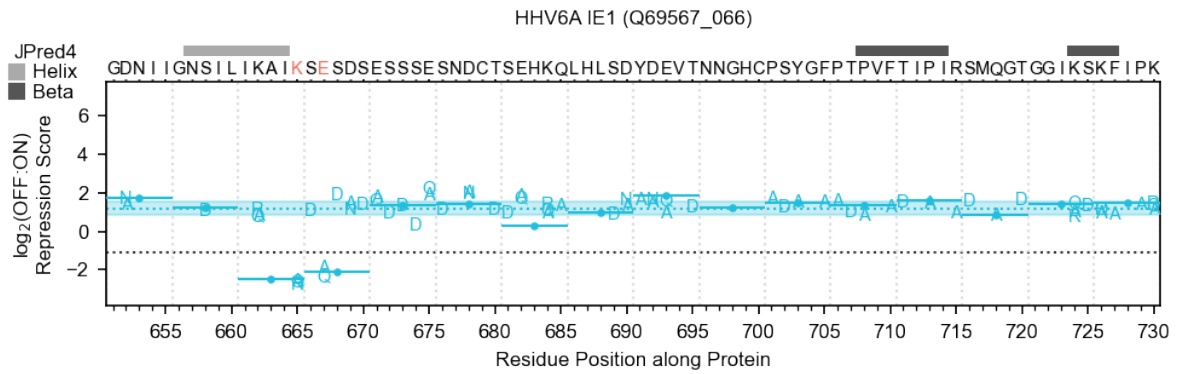

| Motif Name | Motif Start | Motif End | Motif Sequence | Overlaps Essential? | Essential Start | Essential End | Essential Sequence |
|------------|-------------|-----------|----------------|---------------------|-----------------|---------------|--------------------|
| SUMO_for   | 664         | 667       | IKSE           | Yes                 | 661             | 670           | IKAIKSESDS         |
| SUMO_rev   | 676         | 686       | SNDCTSEHKQL    | No                  | -               | -             |                    |

Extended repression domain from residues 711 to 820:

TIPIRSMQGTGGIKSKFIPKKNWIWYMKKTHQVDNCPHNSENVDAKDDSDGTEAKHCFMNHFVPIKTDDDEDYDKNNVSYIYNKIQNSKIDSGDIIPTKKLIIDMVMDNF

Max tile of repression domain from residues 731 to 810 (estimated 20.3% to 32.4% of cells repressed):

KNWIWYMKKTHQVDNCPHNSENVDAKDDSDGTEAKHCFMNHFVPIKTDDDEDYDKNNVSYIYNKIQNSKIDSGDIIPTKK

Extended repression domain from residues 761 to 850:

DGTEAKHCFMNHFVPIKTDDDEDYDKNNVSYIYNKIQNSKIDSGDIIPTKKLIIDMVMDNFMDLNDIIKQGITKHCQDLCNKYNNVTPPTC

Max tile of repression domain from residues 771 to 850 (estimated 10.3% to 21.4% of cells repressed):

NHFVPIKTDDDEDYDKNNVSYIYNKIQNSKIDSGDIIPTKKLIIDMVMDNFMDLNDIIKQGITKHCQDLCNKYNNVTPPTC

HHV6B IE1 (Q77PU6)

Gene: U90 ; Protein Family: IE

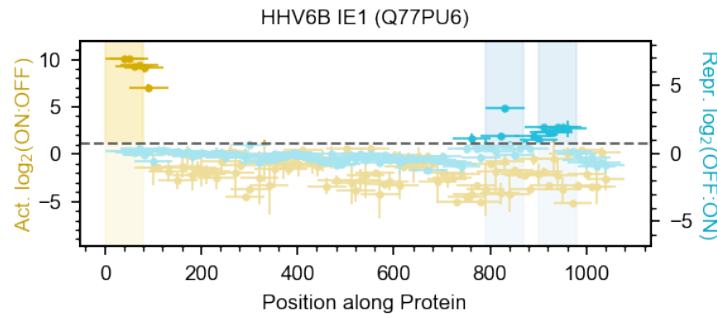

Extended activation domain from residues 1 to 130:

MESAKDTTSTSMFILGKPSGNNMESNEERMQNYHPDPVVEESIKEILEESLKCDVSFESLLFPELEAFDLFIPESSNDIASKNVSYSSNVEEGASDEFKTLVAQSVGNCIQSIGASVKAAMKQEQSNMED

Max tile of activation domain from residues 1 to 80 (estimated 96.0% to 96.6% of cells activated):

MESAKDTTSTSMFILGKPSGNNMESNEERMQNYHPDPVVEESIKEILEESLKCDVSFESLLFPELEAFDLFIPESSNDIA

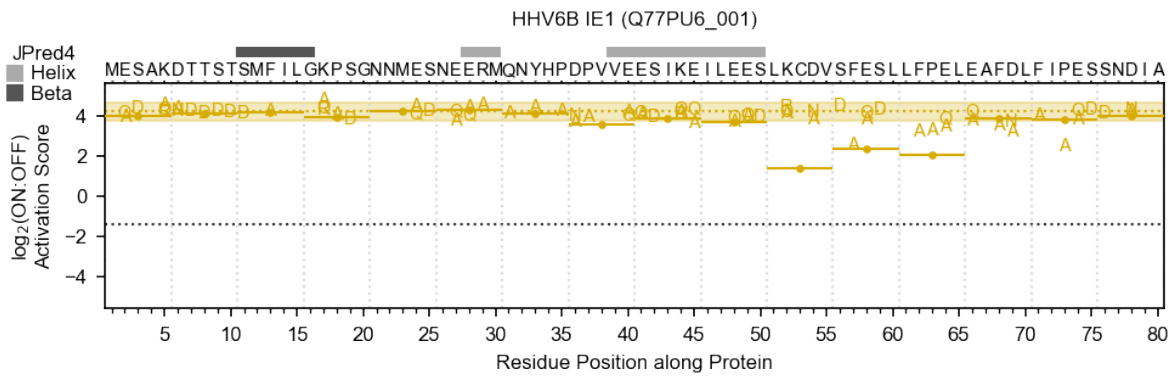

| Motif Name  | Motif Start | Motif End | Motif Sequence | Overlaps Essential? | Essential Start | Essential End | Essential Sequence |
|-------------|-------------|-----------|----------------|---------------------|-----------------|---------------|--------------------|
| flexi_NRBOX | 42          | 48        | SIKEILE        | No                  | -               | -             |                    |
| flexi_NRBOX | 56          | 62        | SFESLLF        | No                  | -               | -             |                    |

Extended repression domain from residues 781 to 870:

ESEDEEDGNNIIDKSMLEKTIKSEPNSSESSSESDDCTSEDNYLHLSYDKVINNGHCQSKGFSPVFTIPIRSMPGTHDIRNKFPKHHW

Max tile of repression domain from residues 791 to 870 (estimated 72.5% to 81.0% of cells repressed):

IIDKSMLEKTIKSEPNSSESSSESDDCTSEDNYLHLSYDKVINNGHCQSKGFSPVFTIPIRSMPGTHDIRNKFPKHHW

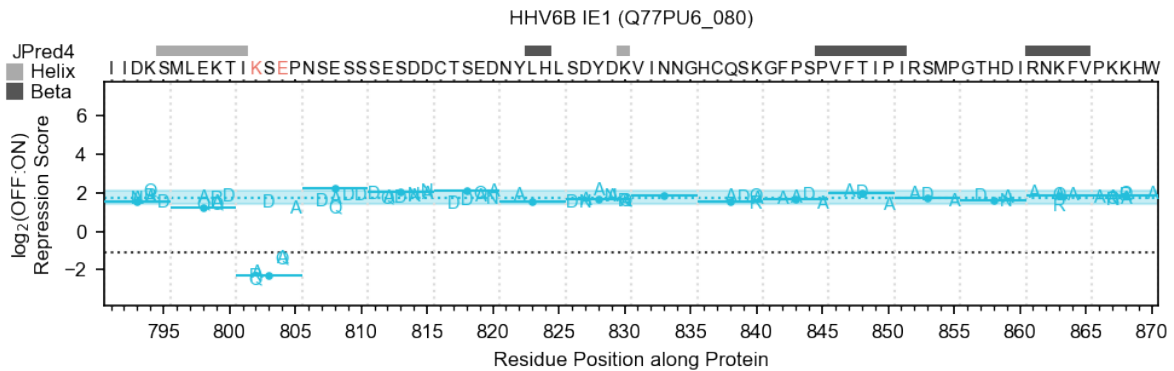

| Motif Name | Motif Start | Motif End | Motif Sequence | Overlaps Essential? | Essential Start | Essential End | Essential Sequence |
|------------|-------------|-----------|----------------|---------------------|-----------------|---------------|--------------------|
| SUMO_for   | 801         | 804       | IKSEP          | Yes                 | 801             | 805           | IKSEP              |

Extended repression domain from residues 851 to 1000:

IRSMGTHDIRNKFPKHHWLFMRKTHKVDNCVIHSSAKMNVKNDSDVTEANHCFINHFVPIKTDDEEYKENVSYTYSKIQDSKTDLEDITPTKLLITE



**Herpesvirus Tiling and Perturbation Screen Data from Ludwig, C.H. et al. 2023**

MVMENFMDLTDIIKHGIAKHCQDLSSKYTVITHACEKNLNVANSQNLV

Max tile of repression domain from residues 901 to 980 (estimated 38.7% to 44.5% of cells repressed):

EANHCFINHFVPIKTDDEEYEKENVSYTYSKIQDSKTDLEDITPTKKLITEMVMENFMDLTDIIKHGIAKHCQDLSSKYT

---

HCMV IE2 (P06434)

Gene: UL122 ; Protein Family: IE

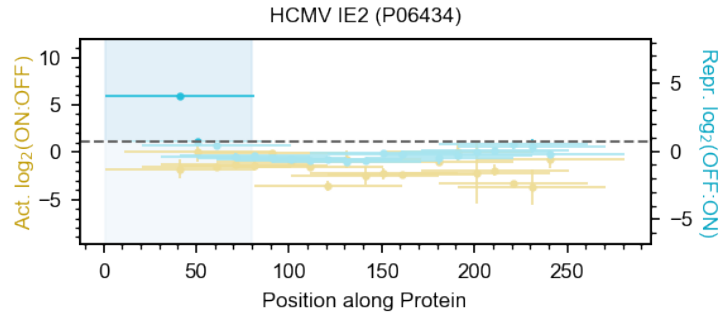

Extended repression domain from residues 1 to 80:

MLPLIKQEDIKPEPDFTIQYRNKIIDTAGCIVISDSEEEQGEEVETRGATASSPSTGSGTTPRVTSPTHPLSQMNHPLPD

Max tile of repression domain from residues 1 to 80 (estimated 88.2% to 89.4% of cells repressed):

MLPLIKQEDIKPEPDFTIQYRNKIIDTAGCIVISDSEEEQGEEVETRGATASSPSTGSGTTPRVTSPTHPLSQMNHPLPD

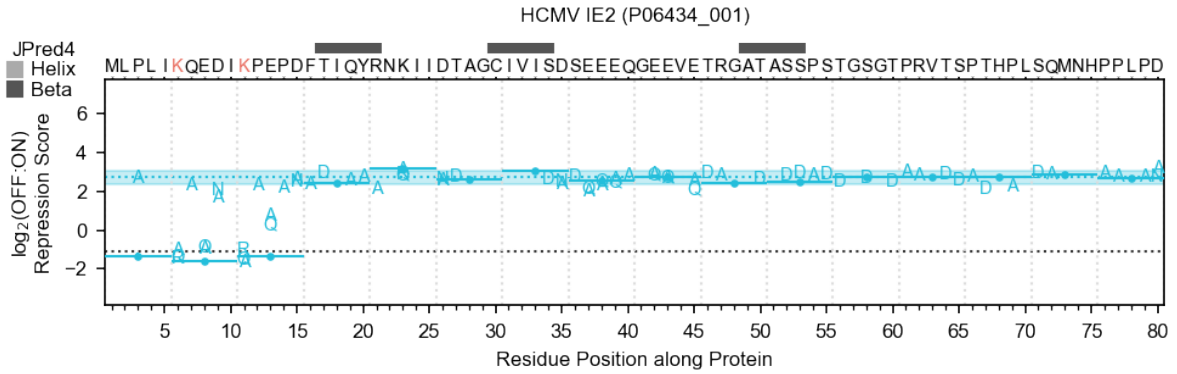

| Motif Name | Motif Start | Motif End | Motif Sequence | Overlaps Essential? | Essential Start | Essential End | Essential Sequence |
|------------|-------------|-----------|----------------|---------------------|-----------------|---------------|--------------------|
| SUMO_for   | 10          | 13        | IKPE           | Yes                 | 1               | 15            | MLPLIKQEDIKPEPD    |
| SUMO_rev   | 8           | 12        | EDIKP          | Yes                 | 1               | 15            | MLPLIKQEDIKPEPD    |
| SUMO_for   | 5           | 8         | IKQE           | Yes                 | 1               | 15            | MLPLIKQEDIKPEPD    |
| WW_2       | 76          | 79        | PPLP           | No                  | -               | -             |                    |

HCMV IE2 (P19893)

Gene: UL122 ; Protein Family: IE

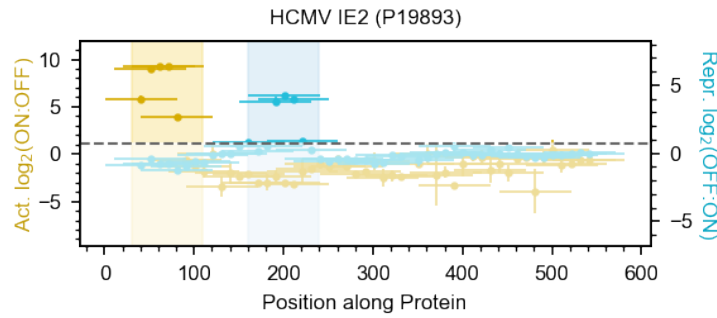

Extended activation domain from residues 1 to 120:

MESSAKRKMDPNPDEGPSSKVPREPVPVKATTFLQTMLRKEVNSQLSLGDPLFPELAEESLKTFEQVTEDCNENPEKDVLAELGDILAQAVNHAGIDSSSTGPTLTHSCSVSSAPLN

Max tile of activation domain from residues 31 to 110 (estimated 94.3% to 94.6% of cells activated):

KATTFLQTMLRKEVNSQLSLGDPLFPELAEESLKTFEQVTEDCNENPEKDVLAELGDILAQAVNHAGIDSSSTGPTLTH

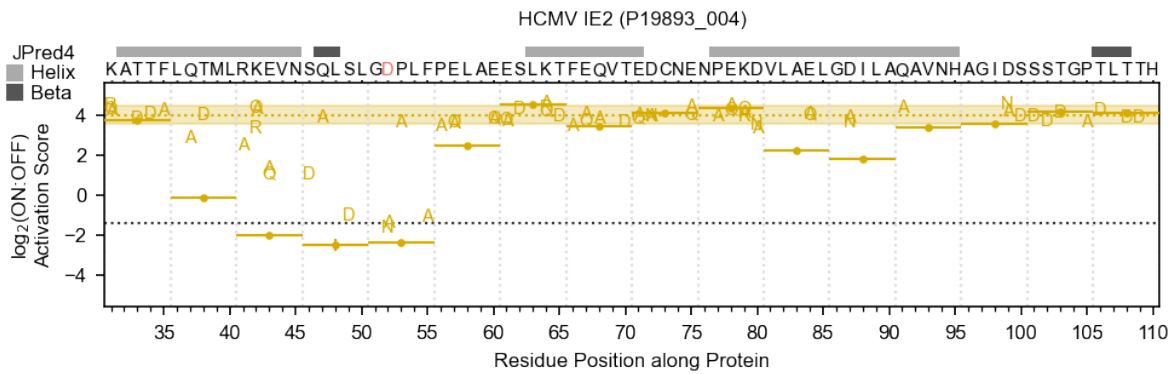

| Motif Name  | Motif Start | Motif End | Motif Sequence | Overlaps Essential? | Essential Start | Essential End | Essential Sequence |
|-------------|-------------|-----------|----------------|---------------------|-----------------|---------------|--------------------|
|             | -           | -         |                | No                  | 41              | 55            | RKEVNSQLSLGDPLF    |
| flexi_NRBOX | 84          | 90        | ELGDILA        | No                  | -               | -             |                    |

Extended repression domain from residues 151 to 260:

KTRPFKVIKPPVPPAPIMLPLIKQEDIKPEPDTIQYRNKIIDTAGCIVISDSEEEQGEEVETRATASSPSTGSGTTPRVTSPTHPLSQMNHPPPLDPLGRPDEDSSS

Max tile of repression domain from residues 161 to 240 (estimated 88.6% to 92.7% of cells repressed):

KPPVPPAPIMLPLIKQEDIKPEPDTIQYRNKIIDTAGCIVISDSEEEQGEEVETRATASSPSTGSGTTPRVTSPTHPLS

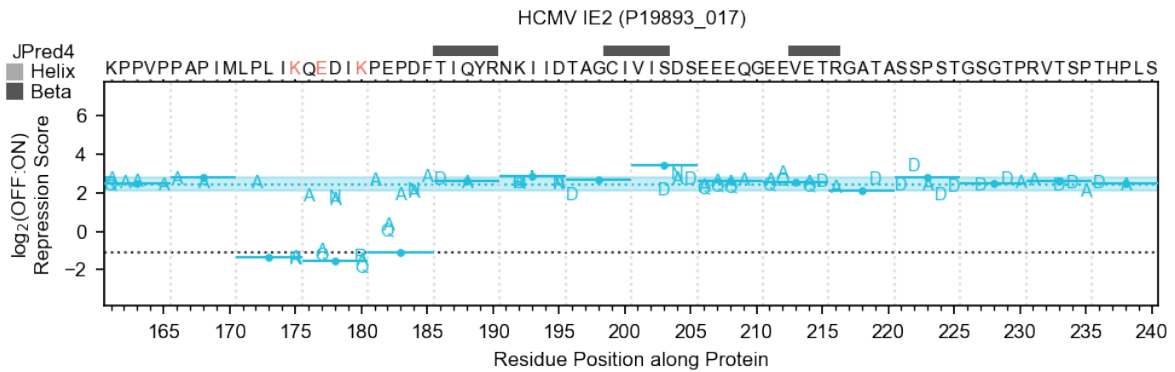

Herpesvirus Tiling and Perturbation Screen Data from Ludwig, C.H. et al. 2023

| Motif Name | Motif Start | Motif End | Motif Sequence | Overlaps Essential? | Essential Start | Essential End | Essential Sequence |
|------------|-------------|-----------|----------------|---------------------|-----------------|---------------|--------------------|
| SUMO_for   | 179         | 182       | IKPE           | Yes                 | 171             | 185           | LPLIKQEDIKPEPDF    |
| SUMO_for   | 174         | 177       | IKQE           | Yes                 | 171             | 185           | LPLIKQEDIKPEPDF    |
| SUMO_rev   | 177         | 181       | EDIKP          | Yes                 | 171             | 185           | LPLIKQEDIKPEPDF    |

---

HHV6A IE2 (Q77Z83)

Gene: U90/U87/U86 ; Protein Family: IE

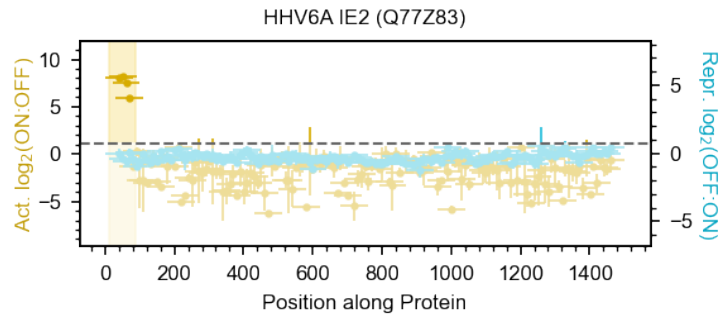

Extended activation domain from residues 1 to 110:

MEPAKPSGNNMGSNDRMQDYRPDPMMEEISIKEILEESLMCDTSFDDLIIPGLESFGLIPESSNNIESNNVEEGSDGELKTLAEQKCKQGNDNDVIQSA  
MKLSGLYCDA

Max tile of activation domain from residues 11 to 90 (estimated 86.5% to 91.0% of cells activated):

MGSNDRMQDYRPDPMMEEISIKEILEESLMCDTSFDDLIIPGLESFGLIPESSNNIESNNVEEGSDGELKTLAEQKCKQ

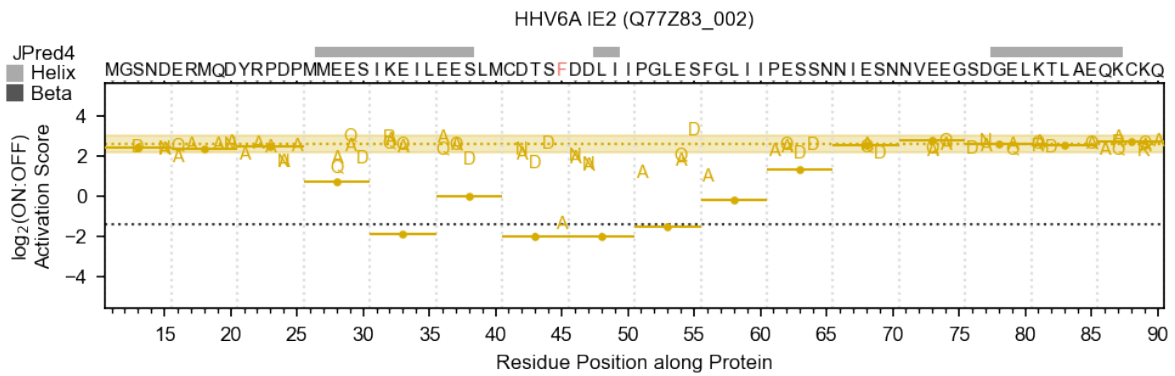

| Motif Name  | Motif Start | Motif End | Motif Sequence | Overlaps Essential? | Essential Start | Essential End | Essential Sequence |
|-------------|-------------|-----------|----------------|---------------------|-----------------|---------------|--------------------|
| flexi_NRBOX | 30          | 36        | SIKEILE        | Yes                 | 31              | 35            | IKEIL              |
| flexi_NRBOX | 44          | 50        | SFDDLI         | Yes                 | 41              | 55            | CDTSFDDLIIPGLES    |
| SUMO_rev    | 73          | 83        | EEGSDGELKTL    | No                  | -               | -             |                    |

HCMV IRL6 (Q6SWD3)

Gene: RL6 ; Protein Family: IRL6

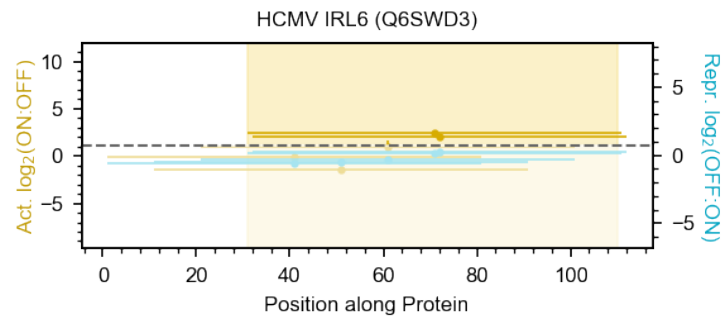

---

Extended activation domain from residues 31 to 111:

PLTTKWKTVFGNNGDQWLCNVTGIGNATVNGNATICVSSCGHNTLDLCNLKSGDSGFFDLRSRWFGENMDEYSGDVWHLEVS

Max tile of activation domain from residues 31 to 110 (estimated 5.4% to 6.3% of cells activated):

PLTTKWKTVFGNNGDQWLCNVTGIGNATVNGNATICVSSCGHNTLDLCNLKSGDSGFFDLRSRWFGENMDEYSGDVWHLEV

---

### HCMV IRS1 (P09715)

Gene: IRS1 ; Protein Family: IRS1

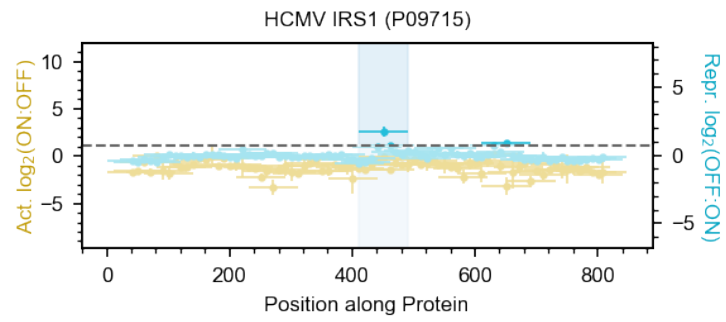

---

Extended repression domain from residues 411 to 500:

AAGGGAICVPNADAHAVVGADAAAAAAPTVMVGSTAMAGPAASGTVPRAMLVLLDELGAVFGYCPLDGHVYPLAAELSHFLRAGVLGAL

Max tile of repression domain from residues 411 to 490 (estimated 27.2% to 46.4% of cells repressed):

AAGGGAICVPNADAHAVVGADAAAAAAPTVMVGSTAMAGPAASGTVPRAMLVLLDELGAVFGYCPLDGHVYPLAAELSH

---

HCMV ITP (P16784)

Gene: UL47 ; Protein Family: ITP

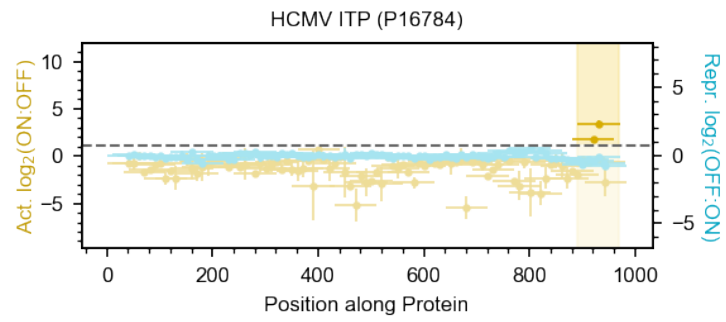

---

Extended activation domain from residues 881 to 970:

AGTGVA AAAEADRALREFLEAPWESAPQPRLRMPDPTDHEESTAGATSVPEVLGARYEPAHLAASDLLNWIYIPVVSQAQQDILSSIDPP

Max tile of activation domain from residues 891 to 970 (estimated 9.0% to 14.5% of cells activated):

ADRALREFLEAPWESAPQPRLRMPDPTDHEESTAGATSVPEVLGARYEPAHLAASDLLNWIYIPVVSQAQQDILSSIDPP

---



HHV6B ITP (P52437)

Gene: U30 ; Protein Family: ITP

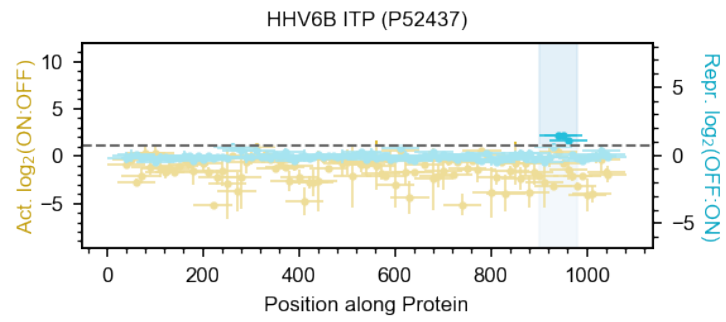

---

Extended repression domain from residues 901 to 1000:

MLRNIITSVSSSKELLTNEALQKFIDTVQRISQHVNETYHSISVNLEKCKTNDILIESLKKIIVDVLSSNAILNTSLASRCLEANLAVSNNSTIL

Max tile of repression domain from residues 901 to 980 (estimated 28.2% to 29.7% of cells repressed):

MLRNIITSVSSSKELLTNEALQKFIDTVQRISQHVNETYHSISVNLEKCKTNDILIESLKKIIVDVLSSNAILNTSL

---

HSV2 ITP (P89460)

Gene: UL37 ; Protein Family: ITP

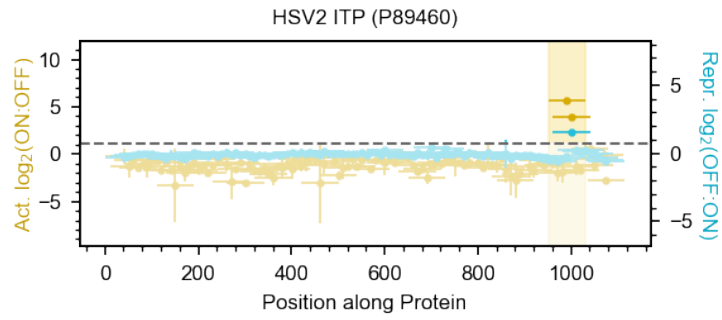

Extended activation domain from residues 951 to 1040:

FASSADQRTAAIQEVMAHATEDAPPSPAADLVVLTNRHDLGAWGDYSLGPLGQPTVVPDSVDLSPQGLAATLSMDWLLINELLQVTDGVF

Max tile of activation domain from residues 951 to 1030 (estimated 45.0% to 53.0% of cells activated):

FASSADQRTAAIQEVMAHATEDAPPSPAADLVVLTNRHDLGAWGDYSLGPLGQPTVVPDSVDLSPQGLAATLSMDWLLIN

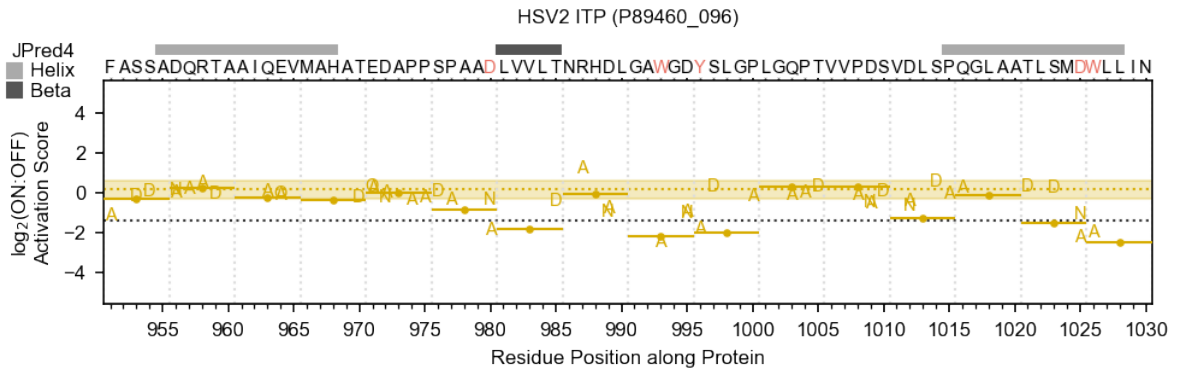

| Motif Name    | Motif Start | Motif End | Motif Sequence | Overlaps Essential? | Essential Start | Essential End | Essential Sequence |
|---------------|-------------|-----------|----------------|---------------------|-----------------|---------------|--------------------|
| SUMO_SIM_anti | 980         | 985       | DLVVLT         | Yes                 | 981             | 985           | LVVLT              |
| SUMO_SIM_par  | 980         | 985       | DLVVLT         | Yes                 | 981             | 985           | LVVLT              |
| -             | -           | -         |                | No                  | 991             | 1000          | GAWGDYSLGP         |
| -             | -           | -         |                | No                  | 1021            | 1030          | TLSDWLLIN          |

VZV ITP (P09277)

Gene: ORF21 ; Protein Family: ITP

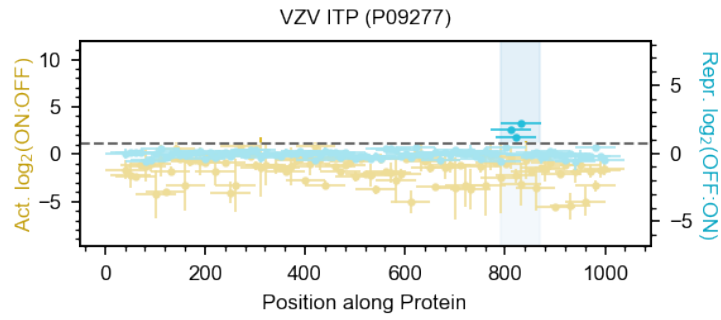

Extended repression domain from residues 771 to 870:

VGICNPKVERDEQFGVWRLNDLADAVGHIVGTIQGIRTQMRVGISSLRTIMADASSALRECEENLMTKTSTSAIGPLFSTMASRYARFTQDQMDILMRVDK

Max tile of repression domain from residues 791 to 870 (estimated 45.5% to 50.5% of cells repressed):

DLADAVGHIVGTIQGIRTQMRVGISSLRTIMADASSALRECEENLMTKTSTSAIGPLFSTMASRYARFTQDQMDILMRVDK

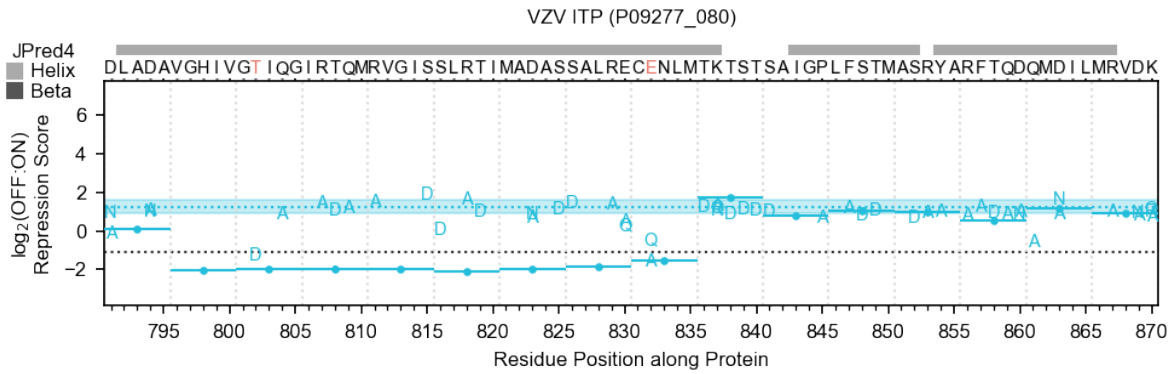

| Motif Name  | Motif Start | Motif End | Motif Sequence | Overlaps Essential? | Essential Start | Essential End | Essential Sequence                                                           |
|-------------|-------------|-----------|----------------|---------------------|-----------------|---------------|------------------------------------------------------------------------------|
| flexi_NRBOX | 795         | 801       | AVGHIVG        | Yes                 | 796             | 835           | VGHIVGTIQGIRTQMRVGISSLRTIMADASSALRECEENLMTKTSTSAIGPLFSTMASRYARFTQDQMDILMRVDK |

KSHV KbZIP (Q2HR82)

Gene: K8 ; Protein Family: KbZIP

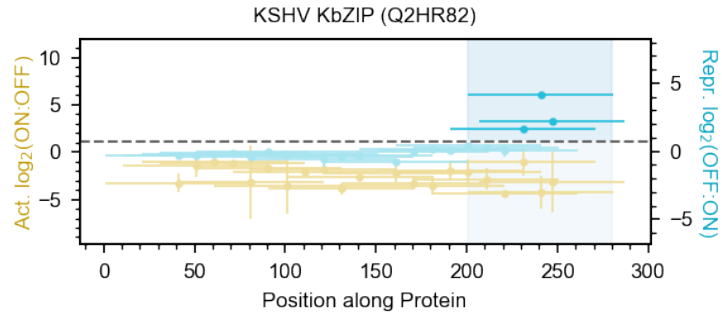

Extended repression domain from residues 191 to 286:

PAQP<sup>T</sup>HLVLFSPV<sup>F</sup>SLKAEVCDQ<sup>S</sup>HSPT<sup>R</sup>KQGRYGRV<sup>S</sup>SKAYTRQLQQALEEKDAQLCF<sup>L</sup>AAARLEAHKEQ<sup>I</sup>IFLRDMLMRMCQQPASPTDAPLPPC

Max tile of repression domain from residues 201 to 280 (estimated 88.3% to 90.4% of cells repressed):

PVFVSLKAEVCDQ<sup>S</sup>HSPT<sup>R</sup>KQGRYGRV<sup>S</sup>SKAYTRQLQQALEEKDAQLCF<sup>L</sup>AAARLEAHKEQ<sup>I</sup>IFLRDMLMRMCQQPASPTD

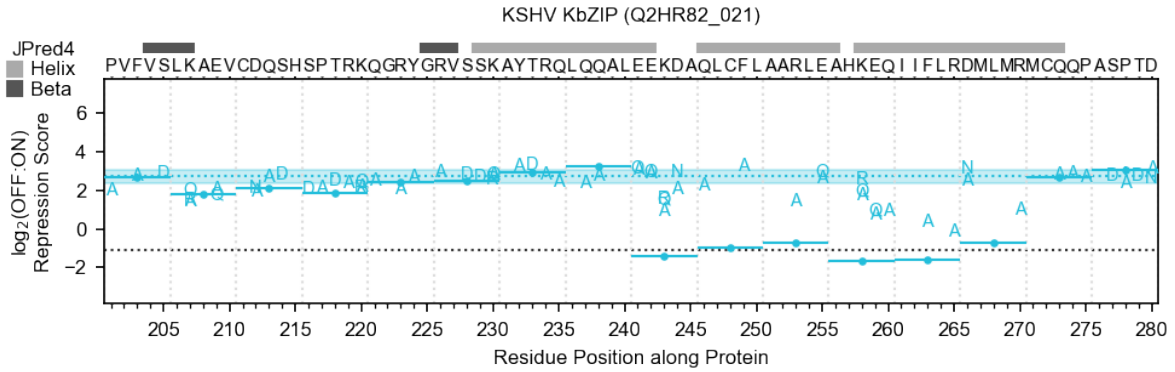

| Motif Name | Motif Start | Motif End | Motif Sequence | Overlaps Essential? | Essential Start | Essential End | Essential Sequence |
|------------|-------------|-----------|----------------|---------------------|-----------------|---------------|--------------------|
| SUMO_for   | 206         | 209       | LKAE           | No                  | -               | -             |                    |
|            | -           | -         |                | No                  | 241             | 245           | EEKDA              |
|            | -           | -         |                | No                  | 256             | 265           | AHKEQIIFLR         |

KSHV LANA1 (Q9QR71)

Gene: ORF73 ; Protein Family: LANA1

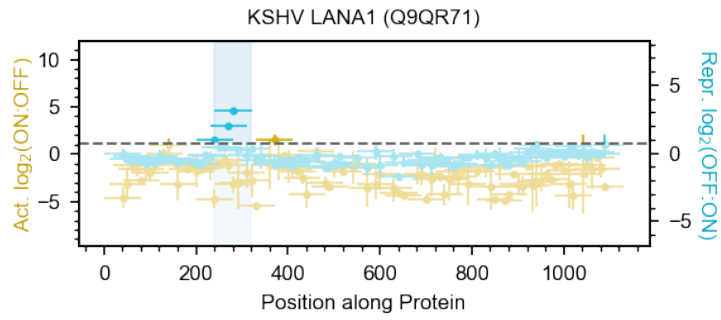

Extended repression domain from residues 231 to 320:

NRSVYPPWATESPIYVGSSSDGDTPPRQPPTSPISIGSSSPSEGSWGDDTAMLVLLAEIAEEASKNEKECSENQAGEDNGDNEISKESQ

Max tile of repression domain from residues 241 to 320 (estimated 70.3% to 74.5% of cells repressed):

ESPIYVGSSSDGDTPPRQPPTSPISIGSSSPSEGSWGDDTAMLVLLAEIAEEASKNEKECSENQAGEDNGDNEISKESQ

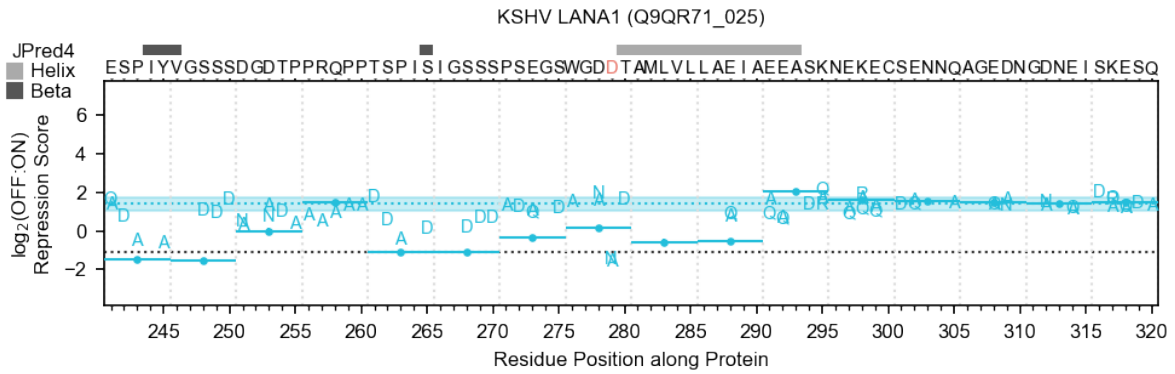

| Motif Name   | Motif Start | Motif End | Motif Sequence | Overlaps Essential? | Essential Start | Essential End | Essential Sequence |
|--------------|-------------|-----------|----------------|---------------------|-----------------|---------------|--------------------|
|              | -           | -         |                | No                  | 241             | 250           | ESPIYVGSSS         |
| WW_3         | 254         | 258       | TPPRQ          | No                  | -               | -             |                    |
| SUMO_SIM_par | 261         | 270       | TSPISIGSSS     | Yes                 | 261             | 270           | TSPISIGSSS         |
| SUMO_SIM_par | 282         | 288       | MLVLLAE        | No                  | -               | -             |                    |

EBV LF1 (Q8AZJ5)

Gene: LF1 ; Protein Family: LF1

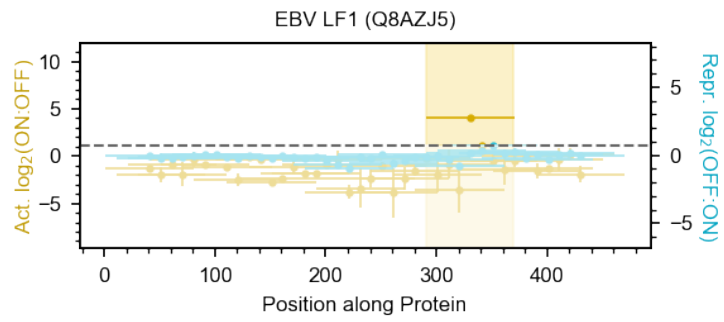

---

Extended activation domain from residues 291 to 380:

RAEEGWVCDVLLLEPGPPTAREGCSLSMDPGLVTLKDAWTLFPLHPEHDAVVPPKEEIHVMAQGHLLQGGTPSLWGFTFQEAACDQWVLRPR

Max tile of activation domain from residues 291 to 370 (estimated 17.0% to 21.2% of cells activated):

RAEEGWVCDVLLLEPGPPTAREGCSLSMDPGLVTLKDAWTLFPLHPEHDAVVPPKEEIHVMAQGHLLQGGTPSLWGFTFQEA

---

HHV6A LJ1 (Q69545)

Gene: LJ1 ; Protein Family: LJ1

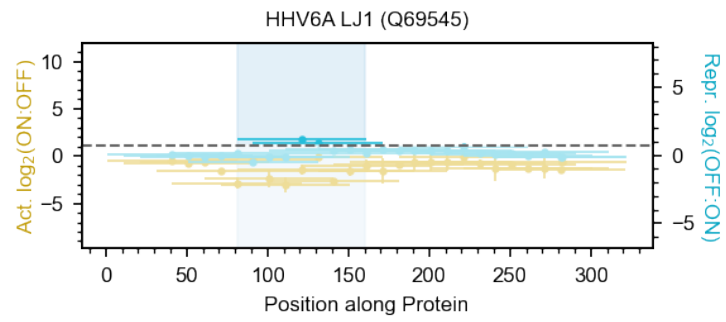

---

Extended repression domain from residues 81 to 170:

PSSALSGGAGGGSRIHDTRVFRARRLGPQPMGSFFHASRSGARVGEKHGASHSGVRARVGGWVRVVRVVRVVRVVRVVRVVRVVRVVR

Max tile of repression domain from residues 81 to 160 (estimated 22.4% to 25.2% of cells repressed):

PSSALSGGAGGGSRIHDTRVFRARRLGPQPMGSFFHASRSGARVGEKHGASHSGVRARVGGWVRVVRVVRVVRVVRVVR

---

EBV LTP (P03186)

Gene: BPLF1 ; Protein Family: LTP

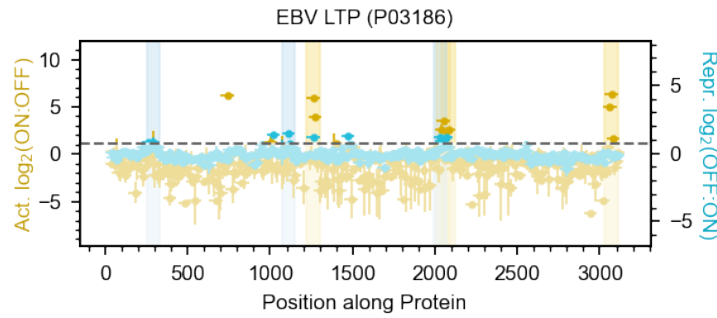

Extended repression domain from residues 241 to 330:

ETEDPRIFMLEHYGVYDFYEANGSGFDLVGPELVSSDGEAAGTPGADSSPPVMLPFERRIIPYNLRPLPSRSFTSDSFPAARYSPAKTNS

Max tile of repression domain from residues 251 to 330 (estimated 10.6% to 23.7% of cells repressed):

EHYGVYDFYEANGSGFDLVGPELVSSDGEAAGTPGADSSPPVMLPFERRIIPYNLRPLPSRSFTSDSFPAARYSPAKTNS

Extended repression domain from residues 1071 to 1160:

LGTALSDMSGIPWPLERVEEDDPSIAPLPEFETVAKKQKELETTRENEKRLRTILDDIEAMLGLAGVASAPGAPISPASPSATPANHDNP

Max tile of repression domain from residues 1071 to 1150 (estimated 28.1% to 31.6% of cells repressed):

LGTALSDMSGIPWPLERVEEDDPSIAPLPEFETVAKKQKELETTRENEKRLRTILDDIEAMLGLAGVASAPGAPISPASP

Extended activation domain from residues 1221 to 1310:

TFYTIDNYIASFEESIDHLYRDLPLVDPEVQDGDIDRILDPMVSEALHTFEMGNRLTLEPARLVALQNFATHSTLKETA AVNLLPGLLAV

Max tile of activation domain from residues 1221 to 1300 (estimated 50.6% to 56.1% of cells activated):

TFYTIDNYIASFEESIDHLYRDLPLVDPEVQDGDIDRILDPMVSEALHTFEMGNRLTLEPARLVALQNFATHSTLKETAAA

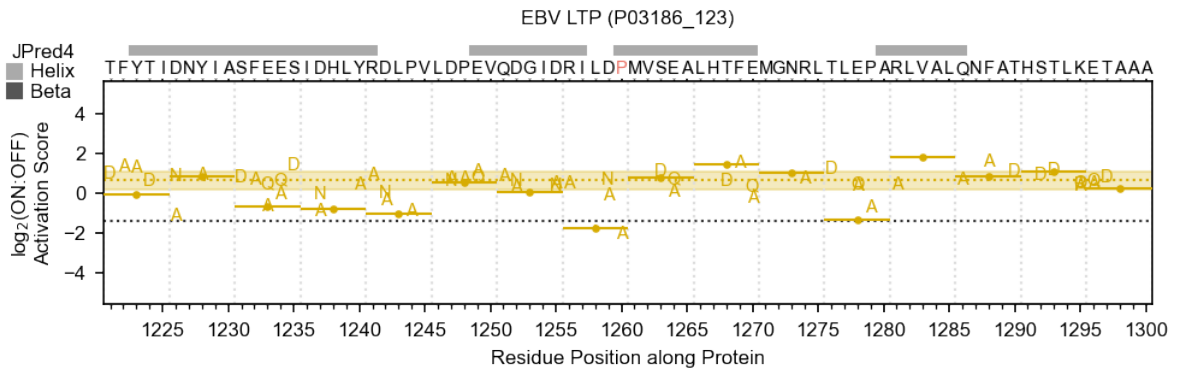

| Motif Name  | Motif Start | Motif End | Motif Sequence | Overlaps Essential? | Essential Start | Essential End | Essential Sequence |
|-------------|-------------|-----------|----------------|---------------------|-----------------|---------------|--------------------|
| flexi_NRBOX | 1224        | 1230      | TIDNYIA        | No                  | -               | -             |                    |
| MYND_1      | 1244        | 1248      | PVLDP          | No                  | -               | -             |                    |
| flexi_NRBOX | 1253        | 1259      | GIDRILD        | Yes                 | 1256            | 1260          | RILD               |

Extended repression domain from residues 1991 to 2080:

TGWGNGAPTRRAQFLAAAGPAKYAGTLWLETESPCDPLNPAYVSADTQEPLNYPVYHNFLEYVMPTVLENPEAFSLTPAGRPQAIGPPQ

Max tile of repression domain from residues 1991 to 2070 (estimated 22.1% to 25.3% of cells repressed):

TGWGNGAPTRRAQFLAAAGPAKYAGTLWLETESPCDPLNPAYVSADTQEPLNYPVYHNFLEYVMPTVLENPEAFSLTPA

Extended activation domain from residues 2001 to 2090:

RAQFLAAAGPAKYAGTLWLETESPCDPLNPAYVSADTQEPLNYPVYHNFLEYVMPTVLENPEAFSLTPAGRPQAIGPPQDDQERRRRTL

Max tile of activation domain from residues 2011 to 2090 (estimated 9.6% to 15.2% of cells activated):

AKYAGTLWLETESPCDPLNPAYVSADTQEPLNYPVYHNFLEYVMPTVLENPEAFSLTPAGRPQAIGPPQDDQERRRRTL



Herpesvirus Tiling and Perturbation Screen Data from Ludwig, C.H. et al. 2023

Extended activation domain from residues 2031 to 2120:

AYVSADTQEPLNYIPVYHNFLEYVMPTVLENPEAFSLTPAGRPPQAIGPPQDDQERRRRTLASVASARLSAAAADSYWDTWPDVESNAGEL

Max tile of activation domain from residues 2041 to 2120 (estimated 5.8% to 6.3% of cells activated):

LNYPVYHNFLEYVMPTVLENPEAFSLTPAGRPPQAIGPPQDDQERRRRTLASVASARLSAAAADSYWDTWPDVESNAGEL

Extended activation domain from residues 3021 to 3120:

MYYPSPGSARYPAPFQALSFSQSVASAPAPSSDQTLLWNTPSVVTQFLSIEDIIREVVTTGGSTSGDLVVPSPGSPSSLSTAAPEQDLRYSLTSLQASRVLS

Max tile of activation domain from residues 3031 to 3110 (estimated 63.5% to 64.1% of cells activated):

YPAPFQALSFSQSVASAPAPSSDQTLLWNTPSVVTQFLSIEDIIREVVTTGGSTSGDLVVPSPGSPSSLSTAAPEQDLRYSL

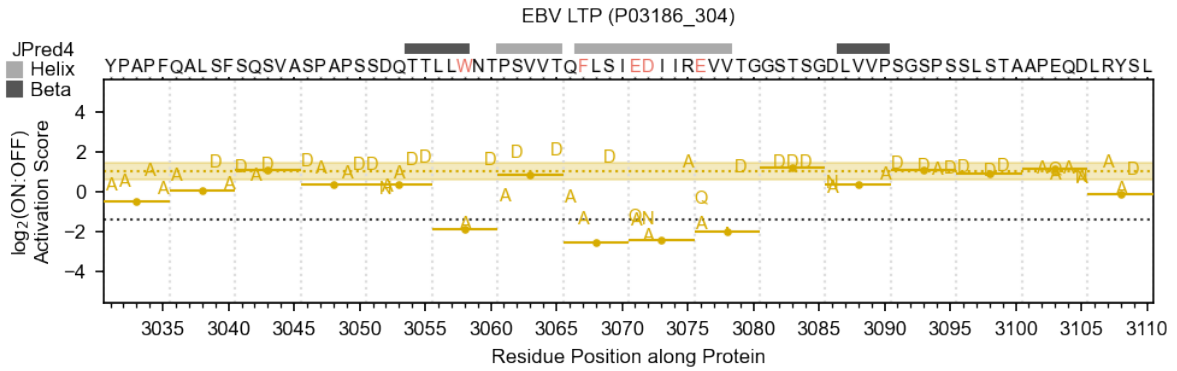

| Motif Name    | Motif Start | Motif End | Motif Sequence | Overlaps Essential? | Essential Start | Essential End | Essential Sequence |
|---------------|-------------|-----------|----------------|---------------------|-----------------|---------------|--------------------|
|               | -           | -         |                | No                  | 3056            | 3060          | LLWNT              |
| flexi_NRBOX   | 3063        | 3069      | VVTQFLS        | Yes                 | 3066            | 3080          | QFLSIEDIIREVVTTG   |
| flexi_NRBOX   | 3069        | 3075      | SIEDIIR        | Yes                 | 3066            | 3080          | QFLSIEDIIREVVTTG   |
| flexi_NRBOX   | 3073        | 3079      | IIREVVT        | Yes                 | 3066            | 3080          | QFLSIEDIIREVVTTG   |
| CtBP_expanded | 3094        | 3098      | PSSLS          | No                  | -               | -             |                    |

HSV1 LTP (P10220)

Gene: UL36 ; Protein Family: LTP

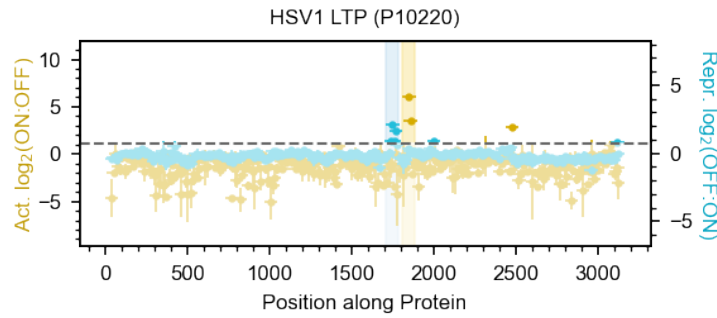

Extended repression domain from residues 1701 to 1810:

ARELDVQAVAWLEHAQRTFETHPLSAASGDGPGLLTRQGARLQALFDTRRRVEALRRSLEEAEAEWDEWVGRFGRVRRGGAWKSPEGFRAACEQLRALQDTTNTVSGLRAQ

Max tile of repression domain from residues 1711 to 1790 (estimated 43.4% to 52.2% of cells repressed):

WLEHAQRTFETHPLSAASGDGPGLLTRQGARLQALFDTRRRVEALRRSLEEAEAEWDEWVGRFGRVRRGGAWKSPEGFRAA

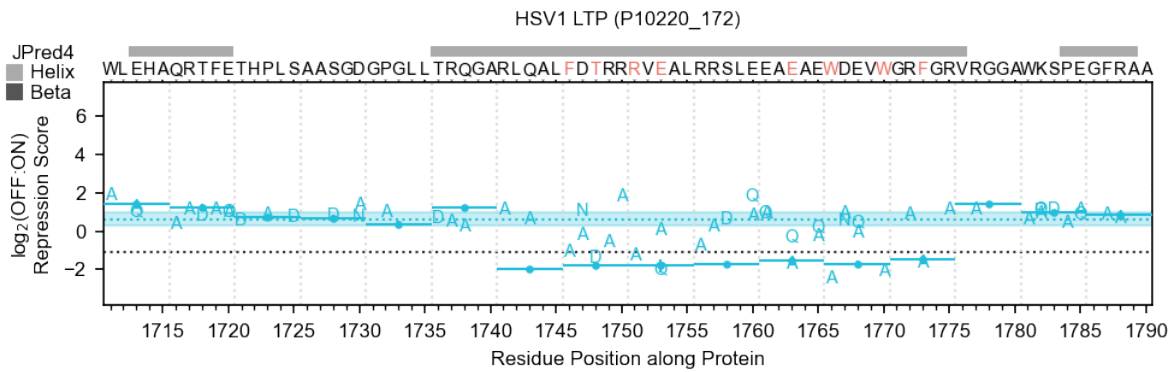

| Motif Name  | Motif Start | Motif End | Motif Sequence | Overlaps Essential? | Essential Start | Essential End | Essential Sequence                  |
|-------------|-------------|-----------|----------------|---------------------|-----------------|---------------|-------------------------------------|
| flexi_NRBOX | 1741        | 1747      | RLQALFD        | Yes                 | 1741            | 1775          | RLQALFDTRRRVEALRRSLEEAEAEWDEWVGRFGR |

Extended activation domain from residues 1811 to 1900:

RDYERLPAKYQGVLGAKSAERAGAVEELGGRVAQHADLSARLRDEVVPRVAWEMNFDLGGLLAEFDVAVAGDLAPWAVEEFRGARELIQR

Max tile of activation domain from residues 1811 to 1890 (estimated 56.8% to 59.3% of cells activated):

RDYERLPAKYQGVLGAKSAERAGAVEELGGRVAQHADLSARLRDEVVPRVAWEMNFDLGGLLAEFDVAVAGDLAPWAVEE

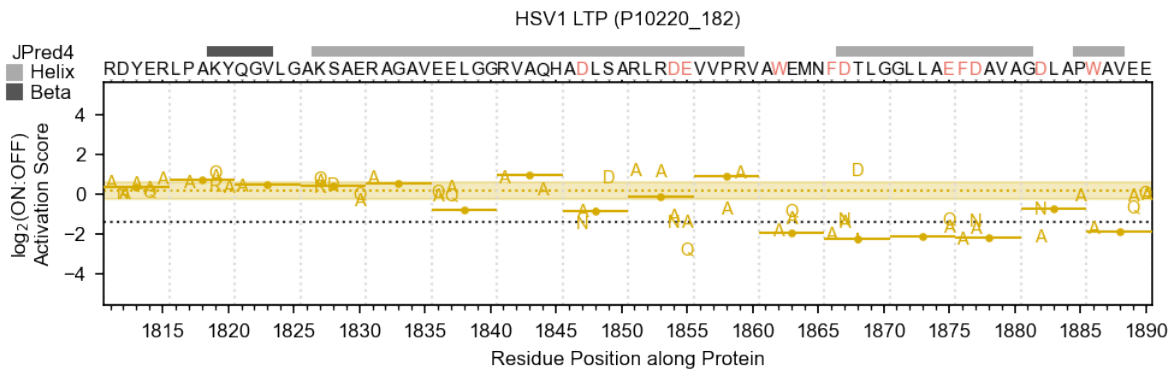

| Motif Name | Motif Start | Motif End | Motif Sequence | Overlaps Essential? | Essential Start | Essential End | Essential Sequence |
|------------|-------------|-----------|----------------|---------------------|-----------------|---------------|--------------------|
| LIG_NRBOX  | 1868        | 1874      | TLGGLLA        | Yes                 | 1861            | 1880          | AWEMNFDLGGLLAEFDVA |
|            | -           | -         |                | No                  | 1886            | 1890          | WAVEE              |

HSV2 LTP (P89459)

Gene: UL36 ; Protein Family: LTP

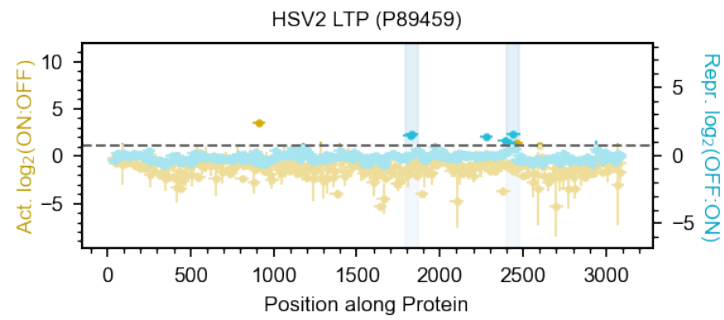

---

Extended repression domain from residues 1781 to 1870:

PAYERLSARYQGVLGAKGAERAEAVEELGARVTKHTALCARLRDEVVRRVPWEMNFDALGGLLAEFDAAAADLAPWAVEEFRGARELIQY

Max tile of repression domain from residues 1791 to 1870 (estimated 29.3% to 31.9% of cells repressed):

QGVLGAKGAERAEAVEELGARVTKHTALCARLRDEVVRRVPWEMNFDALGGLLAEFDAAAADLAPWAVEEFRGARELIQY

---

Extended repression domain from residues 2391 to 2480:

AQLPRLSALIAERPLADGPPCLVLVDISMTPVAVLWEAPEPPGPPDVRVFGSEATEELPFVATAGDVLAAASAADADPFFARAILGRPFD

Max tile of repression domain from residues 2401 to 2480 (estimated 31.8% to 32.2% of cells repressed):

AERPLADGPPCLVLVDISMTPVAVLWEAPEPPGPPDVRVFGSEATEELPFVATAGDVLAAASAADADPFFARAILGRPFD

---

KSHV LTP (Q2HR64)

Gene: ORF64 ; Protein Family: LTP

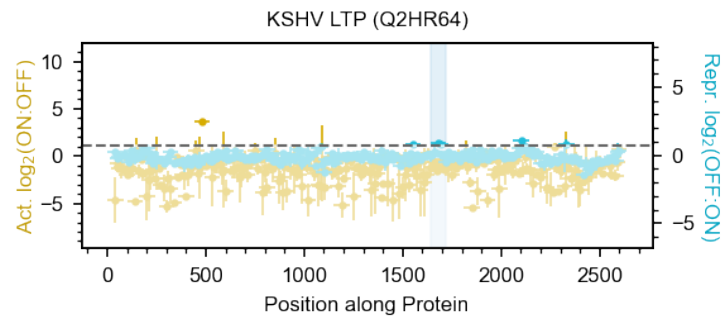

---

Extended repression domain from residues 1641 to 1730:

HFEATQSVVFTAFPLTQEVTIPALHYAGPFDNLERLSRYLHIGQTQPAPGQWLLTLPTFDPTRPACVPAGGHEPPLHRQVVFSSFLEAQI

Max tile of repression domain from residues 1641 to 1720 (estimated 17.8% to 18.7% of cells repressed):

HFEATQSVVFTAFPLTQEVTIPALHYAGPFDNLERLSRYLHIGQTQPAPGQWLLTLPTFDPTRPACVPAGGHEPPLHRQV

---

VZV LTP (Q4JQX9)

Gene: ORF22 ; Protein Family: LTP

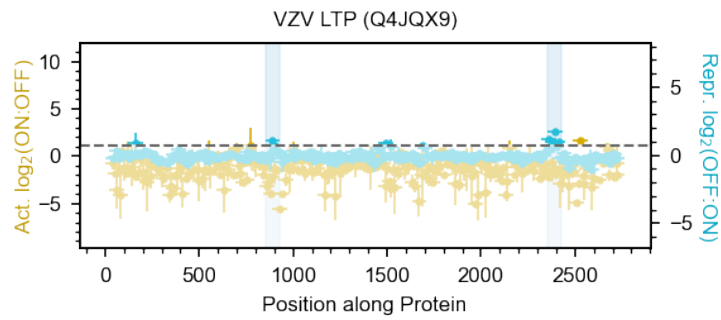

---

Extended repression domain from residues 851 to 940:

KTINTRATQRASAEELSCFNLSAAVDQAVKDYETYNNGEVKYPEITRDDLLATIVRATDDLVRQIKILSDPMIQSGLQPSIKRRLETR

Max tile of repression domain from residues 851 to 930 (estimated 18.8% to 22.4% of cells repressed):

KTINTRATQRASAEELSCFNLSAAVDQAVKDYETYNNGEVKYPEITRDDLLATIVRATDDLVRQIKILSDPMIQSGLQ

---

Extended repression domain from residues 2341 to 2430:

SALIANKPLTNNPPCLLLLDEHMNPSYVLWERKDSIPAPDYVVFWGPELIDLPIYDSDEDSFPSCPDDPFYSQIIAGYAPQGPPNLDTT

Max tile of repression domain from residues 2351 to 2430 (estimated 34.4% to 37.8% of cells repressed):

NNPPCLLLLDEHMNPSYVLWERKDSIPAPDYVVFWGPELIDLPIYDSDEDSFPSCPDDPFYSQIIAGYAPQGPPNLDTT

---

HCMV MCP (P16729)

Gene: UL86 ; Protein Family: MCP

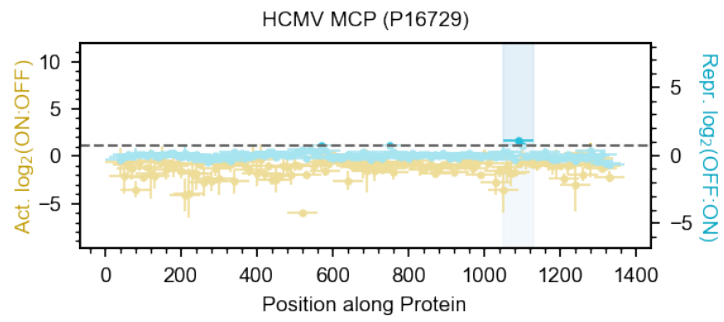

---

Extended repression domain from residues 1051 to 1140:

GKCTSVIINNPIVTKEERDISTTYHVTQNINTVDMGLGYTSNTCVAYVNRVRTDMGVRVQDLFRVFP MNVYRHDEVDRWIRHAAGVERP

Max tile of repression domain from residues 1051 to 1130 (estimated 17.7% to 24.2% of cells repressed):

GKCTSVIINNPIVTKEERDISTTYHVTQNINTVDMGLGYTSNTCVAYVNRVRTDMGVRVQDLFRVFP MNVYRHDEVDRW

---

HHV7 MCP (P52347)

Gene: U57 ; Protein Family: MCP

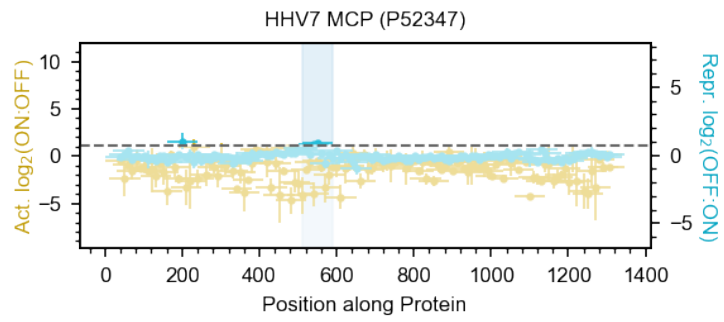

---

Extended repression domain from residues 501 to 590:

MKKEIPKTTNMLKNELTTEDFYKSENF~~TLKTELHPFFDFTYIQNRSTDVLCSPRILLGNIPLPLAPSSFHEARTNQMIEQAKTNNLNYD~~

Max tile of repression domain from residues 511 to 590 (estimated 14.1% to 19.4% of cells repressed):

MLKNELTTEDFYKSENF~~TLKTELHPFFDFTYIQNRSTDVLCSPRILLGNIPLPLAPSSFHEARTNQMIEQAKTNNLNYD~~

---

HSV2 MCP (P06491)

Gene: UL19 ; Protein Family: MCP

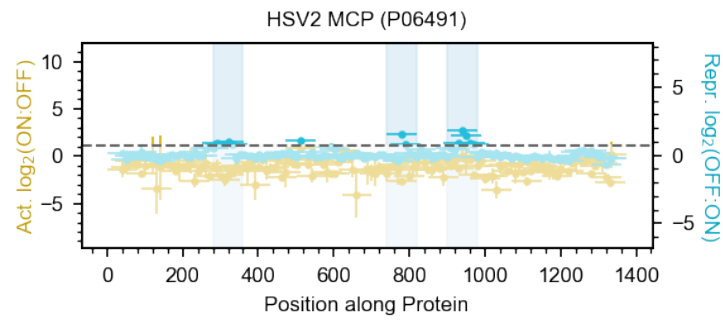

Extended repression domain from residues 251 to 370:

LTTATQPSVAVPRLTHADTRGRPVDGVLVTTAPIKQRLQLQSFLKVEDTEADVPVTYGEMVLNGANLVTALVMGKAVRSLDDVGRHLLMQEEQLDLNRQ  
TLDELESAPQTTRVRADLVS

Max tile of repression domain from residues 281 to 360 (estimated 17.3% to 19.8% of cells repressed):

TAPIKQRLQLQSFLKVEDTEADVPVTYGEMVLNGANLVTALVMGKAVRSLDDVGRHLLMQEEQLDLNRQTLDELESAPQT

Extended repression domain from residues 741 to 830:

ALMRRRAALDRHRDCRVSAGGHDPVYAAACNVATADFNRRNDGQLLHNTQARAADAADDRPHRGADWTVHHKIYYYYVMVPAFSGRCCTAGV

Max tile of repression domain from residues 741 to 820 (estimated 29.5% to 33.8% of cells repressed):

ALMRRRAALDRHRDCRVSAGGHDPVYAAACNVATADFNRRNDGQLLHNTQARAADAADDRPHRGADWTVHHKIYYYYVMVPAF

Extended repression domain from residues 891 to 1010:

MLTLQVLAHNMAERTTALLCSAAPDAGANTASTTNMRIFDGHAGILLMAPQHLDHTIQNGDYFYPLPVHALFAGADHVNANPNFPPALRDLRQVPLV  
PPALGANYFSSIRQPVVQHV

Max tile of repression domain from residues 901 to 980 (estimated 40.0% to 40.2% of cells repressed):

MAERTTALLCSAAPDAGANTASTTNMRIFDGHAGILLMAPQHLDHTIQNGDYFYPLPVHALFAGADHVNANPNFPPAL



VZV MCP (P09245)

Gene: ORF40 ; Protein Family: MCP

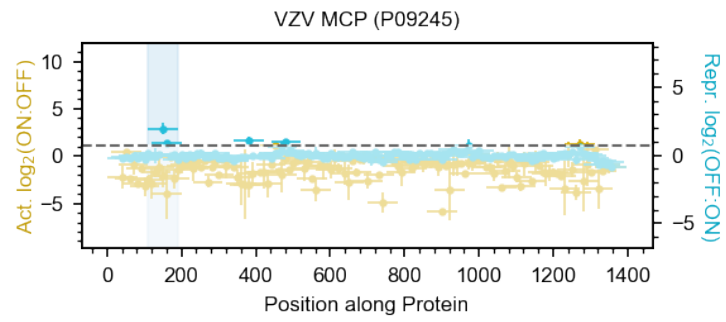

---

Extended repression domain from residues 111 to 200:

VQQPMIARDGPHPVDQPVHNYMVKRIHKRSLSAAFIAISEALSLLSNTYVDGTEIDSSLRIRAIQQMARNLRTVLDSFERGTADQLLGVL

Max tile of repression domain from residues 111 to 190 (estimated 30.9% to 53.7% of cells repressed):

VQQPMIARDGPHPVDQPVHNYMVKRIHKRSLSAAFIAISEALSLLSNTYVDGTEIDSSLRIRAIQQMARNLRTVLDSFER

---

EBV MTP (P03179)

Gene: BNRF1 ; Protein Family: MTP

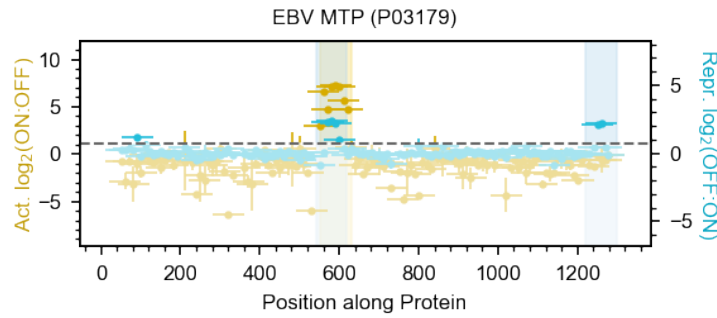

Extended repression domain from residues 531 to 640:

ACDMAGCQHVLGSTVPLGGLNFVNDLASPVSTAEMMDDFSPFFTVEFPPIQEEGASSPVPLDVDESMDISPSYELPWLSLESCLTSILSHPTVGSKEHLVRHTDRVSGG

Max tile of repression domain from residues 541 to 620 (estimated 53.6% to 56.3% of cells repressed):

VLGSTVPLGGLNFVNDLASPVSTAEMMDDFSPFFTVEFPPIQEEGASSPVPLDVDESMDISPSYELPWLSLESCLTSILS

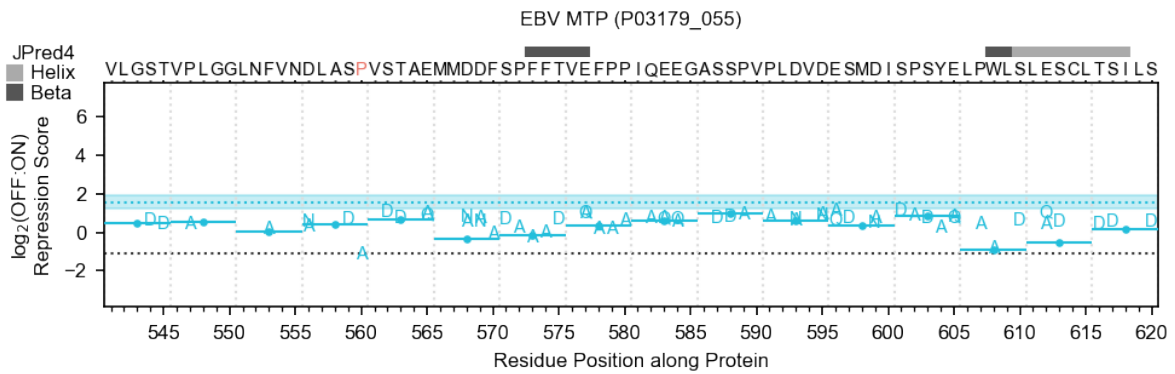

| Motif Name   | Motif Start | Motif End | Motif Sequence | Overlaps Essential? | Essential Start | Essential End | Essential Sequence |
|--------------|-------------|-----------|----------------|---------------------|-----------------|---------------|--------------------|
| SUMO_SIM_par | 590         | 597       | VPLDVDES       | No                  | -               | -             |                    |
| flexi_NRBOX  | 614         | 620       | CLTSILS        | No                  | -               | -             |                    |

Extended activation domain from residues 511 to 660:

TVRQRGEKINGRTLQALGRACDMAGCQHVLGSTVPLGGLNFVNDLASPVSTAEMMDDFSPFFTVEFPPIQEEGASSPVPLDVDESMDISPSYELPWLSLESCLTSILSHPTVGSKEHLVRHTDRVSGGRVAQQPGVGPLDLPLADYAF

Max tile of activation domain from residues 551 to 630 (estimated 78.0% to 82.2% of cells activated):

LNFVNDLASPVSTAEMMDDFSPFFTVEFPPIQEEGASSPVPLDVDESMDISPSYELPWLSLESCLTSILSHPTVGSKEHL

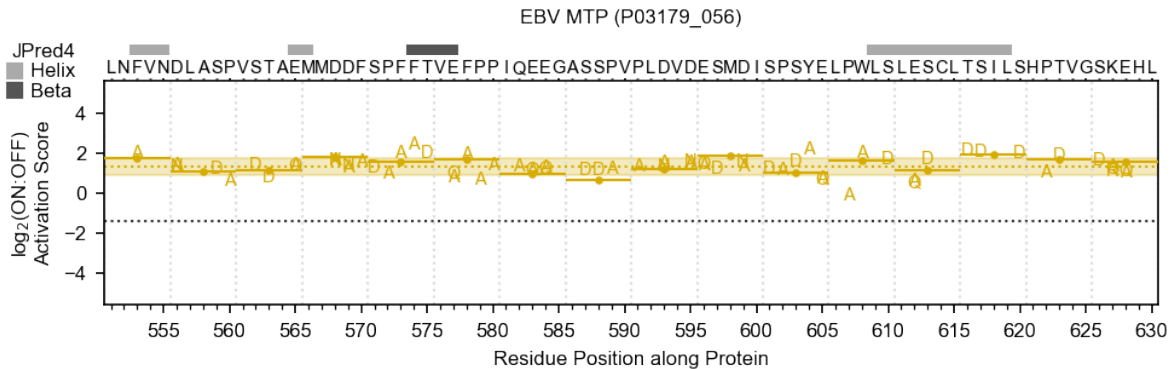

Herpesvirus Tiling and Perturbation Screen Data from Ludwig, C.H. et al. 2023

| Motif Name   | Motif Start | Motif End | Motif Sequence | Overlaps Essential? | Essential Start | Essential End | Essential Sequence |
|--------------|-------------|-----------|----------------|---------------------|-----------------|---------------|--------------------|
| SUMO_SIM_par | 590         | 597       | VPLDVDES       | No                  | -               | -             |                    |
| flexi_NRBOX  | 614         | 620       | CLTSILS        | No                  | -               | -             |                    |

Extended repression domain from residues 1211 to 1300:

GLQFTNLGMPYVLQNAHQIACHFHSNGTDAWRFAMNYPRNPTEQGNIAGLCSRDRHLLALLCDPSLCTDFWQWEHIPPAPFGHPTGCSPWT

Max tile of repression domain from residues 1221 to 1300 (estimated 47.6% to 48.7% of cells repressed):

YVLQNAHQIACHFHSNGTDAWRFAMNYPRNPTEQGNIAGLCSRDRHLLALLCDPSLCTDFWQWEHIPPAPFGHPTGCSPWT

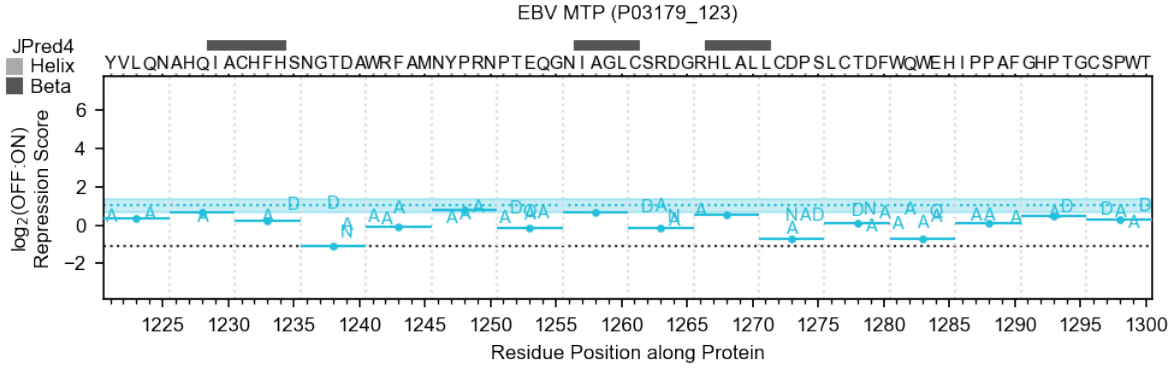

| Motif Name | Motif Start | Motif End | Motif Sequence | Overlaps Essential? | Essential Start | Essential End | Essential Sequence |
|------------|-------------|-----------|----------------|---------------------|-----------------|---------------|--------------------|
|            | -           | -         |                | No                  | -               | -             |                    |

KSHV ORF10 (Q2HRC9)

Gene: ORF10 ; Protein Family: ORF10

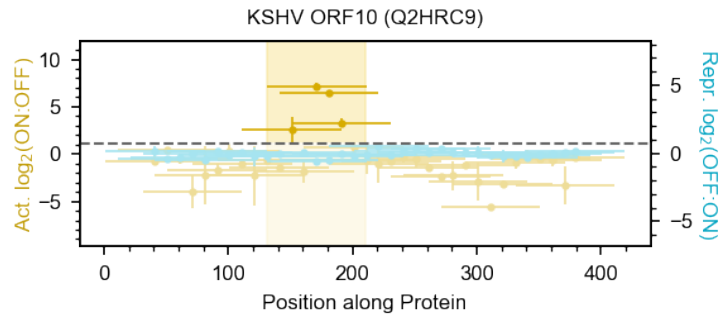

Extended activation domain from residues 131 to 230:

REMTTYVFKGGDLPPGAEEPETLHSAEAPLPSRETLVTGQLRSTSPRTYTYGFHSPVPLSFLDLLTFESMGCENVEGDPEPLTPKYLTFTQTGERLYKVT

Max tile of activation domain from residues 131 to 210 (estimated 72.5% to 83.0% of cells activated):

REMTTYVFKGGDLPPGAEEPETLHSAEAPLPSRETLVTGQLRSTSPRTYTYGFHSPVPLSFLDLLTFESMGCENVEGDPE

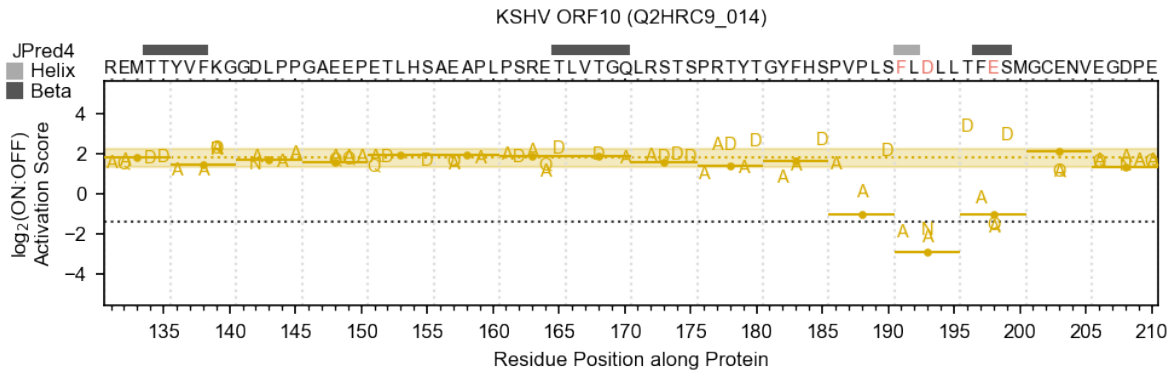

| Motif Name    | Motif Start | Motif End | Motif Sequence | Overlaps Essential? | Essential Start | Essential End | Essential Sequence |
|---------------|-------------|-----------|----------------|---------------------|-----------------|---------------|--------------------|
| SUMO_SIM_anti | 190         | 196       | SFLDLLT        | Yes                 | 191             | 195           | FLDLL              |
| flexi_NRBOX   | 190         | 196       | SFLDLLT        | Yes                 | 191             | 195           | FLDLL              |

KSHV ORF45 (F5HDE4)

Gene: ORF45 ; Protein Family: ORF45

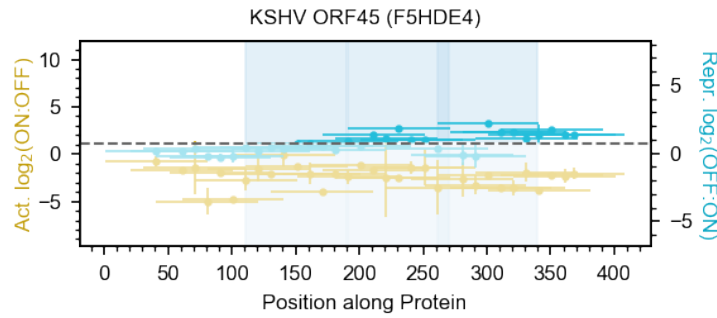

Extended repression domain from residues 111 to 200:

EDEPEGYPADFFQPLSHLRPRPLARRAHTPKPVAVVAGRVRSSDTAESEASMGWVSQDDGFSPAGLSPSDDEGVAILEPMAAYTGTGAY

Max tile of repression domain from residues 111 to 190 (estimated 13.1% to 16.6% of cells repressed):

EDEPEGYPADFFQPLSHLRPRPLARRAHTPKPVAVVAGRVRSSDTAESEASMGWVSQDDGFSPAGLSPSDDEGVAILEP

Extended repression domain from residues 171 to 290:

GFSPAGLSPSDDEGVAILEPMAAYTGTGAYGLSPASRNSVPGTQSSPYSDPDEGPSWRPLRAAPTAIVDLTSDSDSDSSNSPDVNNEAFTDARHFS HQPPSSEEDGEDQGEVLSQRIG

Max tile of repression domain from residues 191 to 270 (estimated 36.2% to 39.4% of cells repressed):

MAAYTGTGAYGLSPASRNSVPGTQSSPYSDPDEGPSWRPLRAAPTAIVDLTSDSDSDSSNSPDVNNEAFTDARHFHSQ

Extended repression domain from residues 261 to 407:

FTDARHFHQPPSSEEDGEDQGEVLSQRIGLMDVGQKRKRQSTASSGSEDVVRQRPNLSRKAVASVIIISSGSDTDEEPSSAVSVIVSPSSTKGHLP TQPSTSAHSISSGSTTTAGSRCSDPTRILASTPPLCGNGAYNWPWLD

Max tile of repression domain from residues 261 to 340 (estimated 46.4% to 50.0% of cells repressed):

FTDARHFHQPPSSEEDGEDQGEVLSQRIGLMDVGQKRKRQSTASSGSEDVVRQRPNLSRKAVASVIIISSGSDTDEE

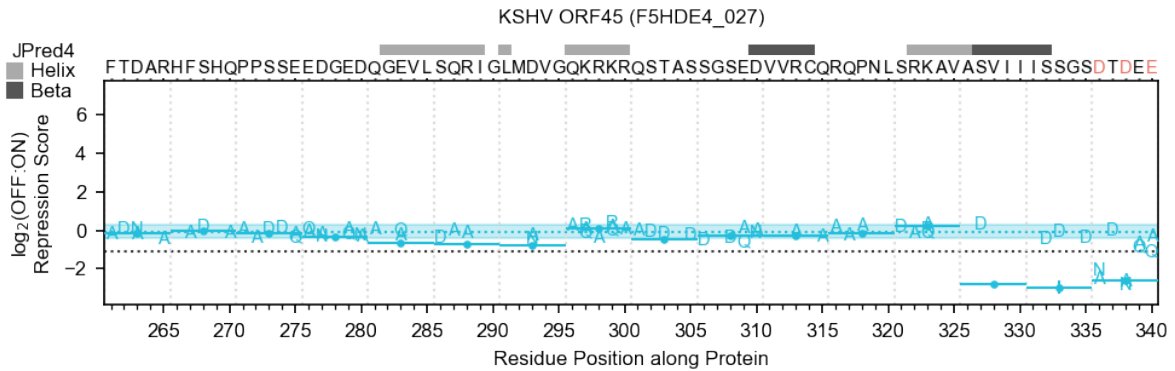

| Motif Name    | Motif Start | Motif End | Motif Sequence | Overlaps Essential? | Essential Start | Essential End | Essential Sequence |
|---------------|-------------|-----------|----------------|---------------------|-----------------|---------------|--------------------|
| flexi_NRBOX   | 324         | 330       | AVASVII        | Yes                 | 326             | 340           | ASVIIISSGSDTDEE    |
| SUMO_SIM_par  | 327         | 333       | SVIISS         | Yes                 | 326             | 340           | ASVIIISSGSDTDEE    |
| SUMO_SIM_anti | 327         | 333       | SVIISS         | Yes                 | 326             | 340           | ASVIIISSGSDTDEE    |

KSHV ORF4 (Q2HRD4)

Gene: ORF4 ; Protein Family: ORF4

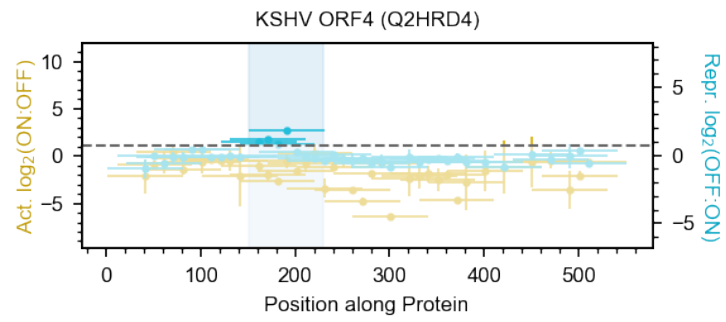

---

Extended repression domain from residues 121 to 230:

FLVGREYVRYCMIGASGQMAWSSPPFCEKEKCHRPKIENGDFKDPDKDYYEYNDAVHFECNEGYTLVGPHSIACAVNNTWTSNMPTCELAGCKFPSVT  
HGYPQQGFSLT

Max tile of repression domain from residues 151 to 230 (estimated 37.4% to 40.8% of cells repressed):

EKCHRPKIENGDFKDPDKDYYEYNDAVHFECNEGYTLVGPHSIACAVNNTWTSNMPTCELAGCKFPSVTHGYPQQGFSLT

---

KSHV ORF52 (Q2HR80)

Gene: ORF52 ; Protein Family: ORF52

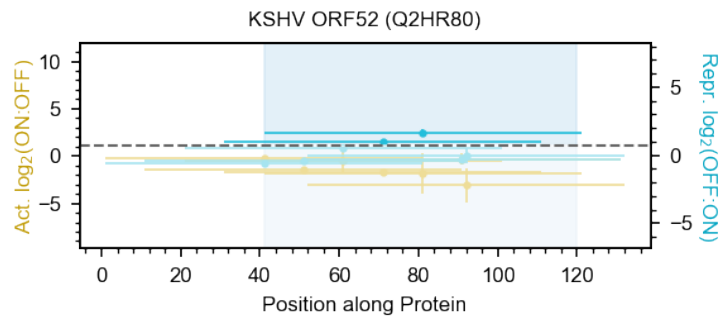

---

Extended repression domain from residues 31 to 120:

LRKALGSTADPRDRPLTATEKEAQLTATVGALSAAAAKKIEARVRTIFSKVVTQKQVDDALKGLSLRIDVCMDSGGTAKPPPGANNRRRR

Max tile of repression domain from residues 41 to 120 (estimated 26.1% to 41.1% of cells repressed):

PRDRPLTATEKEAQLTATVGALSAAAAKKIEARVRTIFSKVVTQKQVDDALKGLSLRIDVCMDSGGTAKPPPGANNRRRR

---

KSHV ORF75 (Q9QR70)

Gene: ORF75 ; Protein Family: ORF75

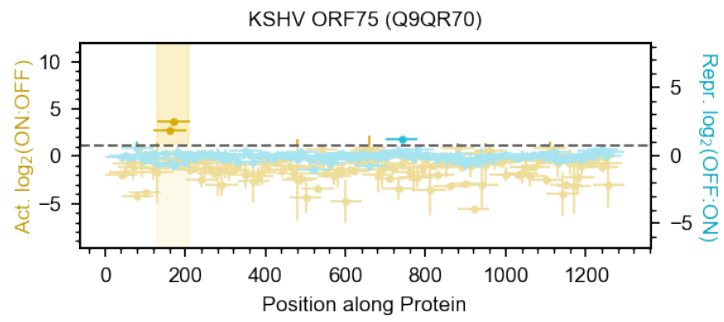

---

Extended activation domain from residues 121 to 210:

LGLQEWARVEVGRHLVSKITQTLLPHPPQFIRAFTQNTDLVPYEGLEVPEGPQPVARPHIEDDVIMQAVMISLGADLLPLAVQASTGDN

Max tile of activation domain from residues 131 to 210 (estimated 12.9% to 13.4% of cells activated):

VGRHLVSKITQTLLPHPPQFIRAFTQNTDLVPYEGLEVPEGPQPVARPHIEDDVIMQAVMISLGADLLPLAVQASTGDN

---



HHV6B P100 (Q69535)

Gene: U11 ; Protein Family: P100

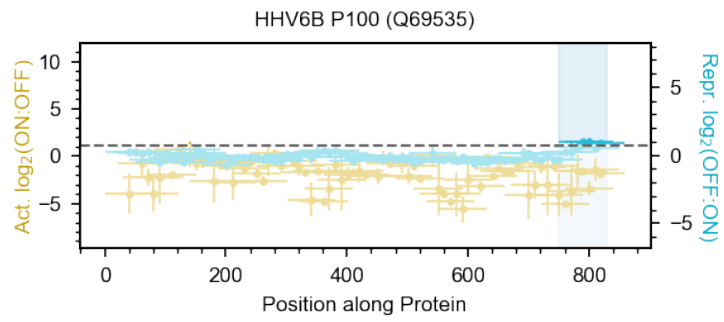

---

Extended repression domain from residues 751 to 840:

LSRDLSVSFKDALDVKLPNGEREIDLALQVKAGERETSDFKVGQDETLIPTQLMKVETPEEKDDVIEKMVLIRIQDGETDEETVPGP

Max tile of repression domain from residues 751 to 830 (estimated 17.4% to 22.0% of cells repressed):

LSRDLSVSFKDALDVKLPNGEREIDLALQVKAGERETSDFKVGQDETLIPTQLMKVETPEEKDDVIEKMVLIRIQDG

---

HSV2 PORTL (P89429)

Gene: UL6 ; Protein Family: PORTL

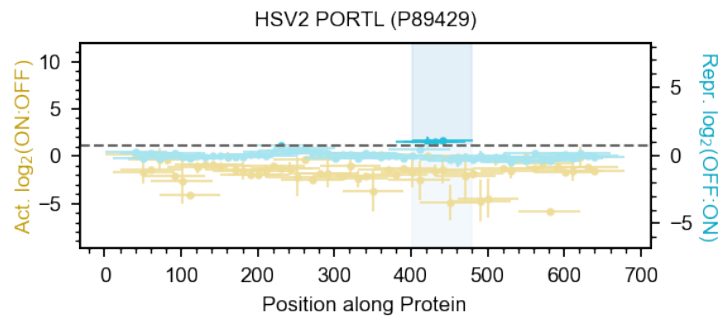

---

Extended repression domain from residues 381 to 480:

TLPGFGKGGTGRGSRPQDPGARPPQLRQAFQTAVVNNINGMLEGYINNLFGTIERLRETNAGLATQLQARDRELRRAGALEREQRAADRAAGGGA  
GRP

Max tile of repression domain from residues 401 to 480 (estimated 18.0% to 24.8% of cells repressed):

ARPQQLRQAFQTAVVNNINGMLEGYINNLFGTIERLRETNAGLATQLQARDRELRRAGALEREQRAADRAAGGGAGRP

---

HCMV PRIM (P17149)

Gene: UL70 ; Protein Family: PRIM

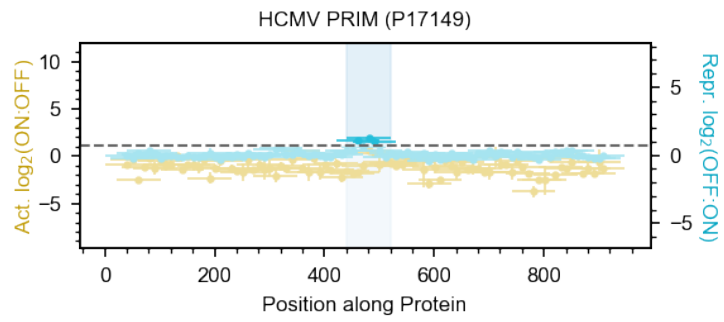

---

Extended repression domain from residues 441 to 530:

NDQHVFCAVASETWHRSLFPRDLLRHVPDSRFSDEALTETVWLHDDDVASTSPETQFYFTRHEVFNERLPVFNFVADFDLRLRDGVSGLA

Max tile of repression domain from residues 441 to 520 (estimated 23.8% to 24.5% of cells repressed):

NDQHVFCAVASETWHRSLFPRDLLRHVPDSRFSDEALTETVWLHDDDVASTSPETQFYFTRHEVFNERLPVFNFVADFDL

---

HHV7 PRIM (P52468)

Gene: U43 ; Protein Family: PRIM

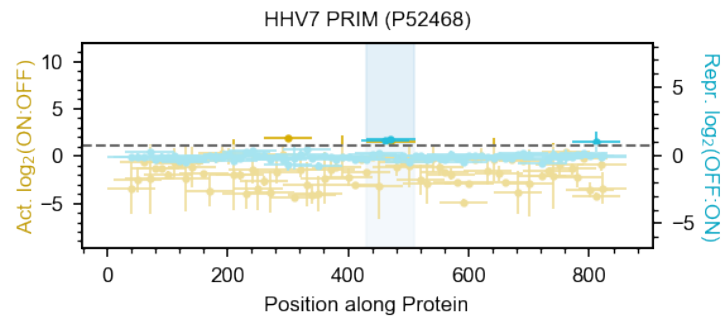

---

Extended repression domain from residues 421 to 510:

YCFGSAESWYKNMGFDQVMQFLPNEYISDESLTSTFWLQDTTFLSDEIEKQFYVTRHEIFNEYLPVTNYIGDLPLQDSAIITESLFFS

Max tile of repression domain from residues 431 to 510 (estimated 18.8% to 25.6% of cells repressed):

KNMGFDQVMQFLPNEYISDESLTSTFWLQDTTFLSDEIEKQFYVTRHEIFNEYLPVTNYIGDLPLQDSAIITESLFFS

---

HSV1 PRIM (P10236)

Gene: UL52 ; Protein Family: PRIM

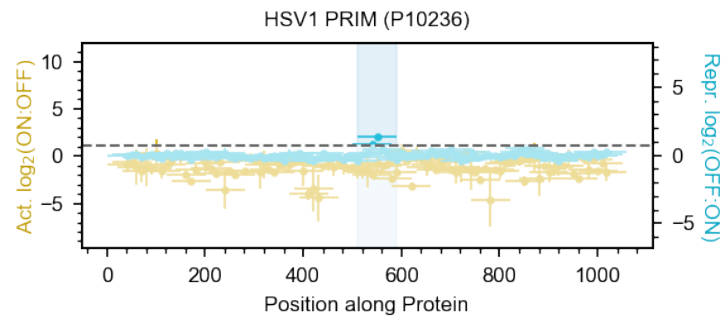

---

Extended repression domain from residues 501 to 590:

VKRLRLAATEQQGTPPAIAALIRNAAVQTPLPVYRISMVPTGQAFALAWDDWARITRDARLAEAVVSAEAAAHPDHGALGRRLTDRI

Max tile of repression domain from residues 511 to 590 (estimated 22.9% to 30.4% of cells repressed):

EQQGTPPAIAALIRNAAVQTPLPVYRISMVPTGQAFALAWDDWARITRDARLAEAVVSAEAAAHPDHGALGRRLTDRI

---

VZV PRIM (Q4JQW9)

Gene: ORF6 ; Protein Family: PRIM

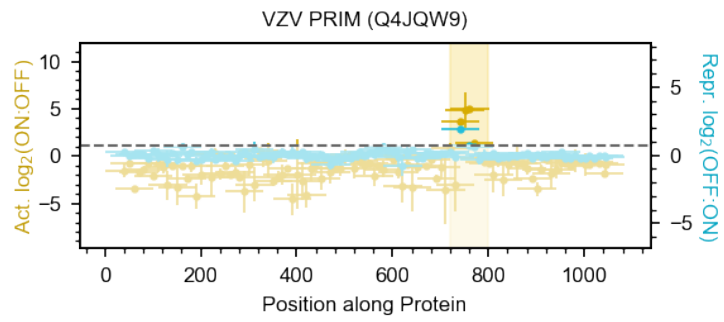

---

Extended activation domain from residues 701 to 810:

LFPKAVVNPKNKDPICYFYKTACPEPTVEVLDDDNLLDITSHSDIDFYIENGELYTCVEENYTEDVWFFDTQTTSEVHTHADVSNNENLHETLPCNCKEKIGF  
RVCVPIPNP

Max tile of activation domain from residues 721 to 800 (estimated 30.9% to 35.4% of cells activated):

CPEPTVEVLDDDNLLDITSHSDIDFYIENGELYTCVEENYTEDVWFFDTQTTSEVHTHADVSNNENLHETLPCNCKEKIG

---

KSHV RIR1 (Q2HR67)

Gene: ORF61 ; Protein Family: RIR1

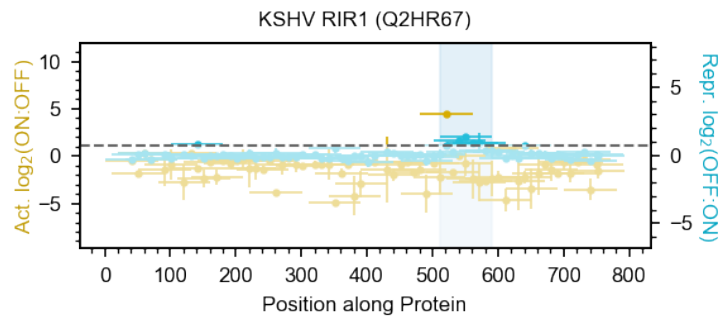

---

Extended repression domain from residues 501 to 610:

IGVQGLADVFAELGYGYLDAESAELDKNIFQSMYYTAVETSHNLVLEGQGVPFHGWEVSNFAKGRFHWQWEGEDASFVPRHRWDALGKSIAEHGIFN  
SQFLAVMPTAGT

Max tile of repression domain from residues 511 to 590 (estimated 26.0% to 29.1% of cells repressed):

AELGYGYLDAESAELDKNIFQSMYYTAVETSHNLVLEGQGVPFHGWEVSNFAKGRFHWQWEGEDASFVPRHRWDALGKS

---

HHV6A RJ1 (Q69577)

Gene: RJ1 ; Protein Family: RJ1

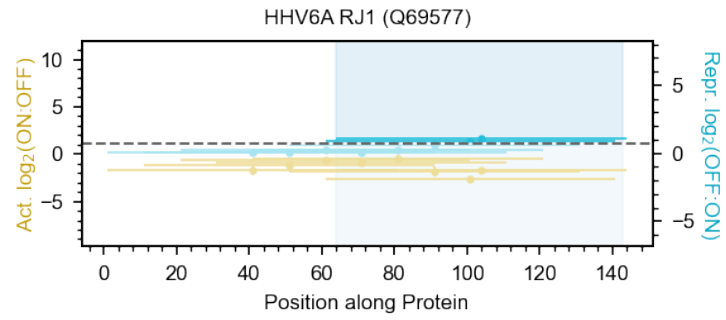

---

Extended repression domain from residues 61 to 143:

RVRVRARPRVRVRARPRVRVRASPRVRVRVITPPFFSPPGGFDVIFKTRGIPSPGETVLDKKVSRPWRGLTSRRGATMI

Max tile of repression domain from residues 64 to 143 (estimated 17.8% to 23.6% of cells repressed):

VRARPRVRVRARPRVRVRASPRVRVRVITPPFFSPPGGFDVIFKTRGIPSPGETVLDKKVSRPWRGLTSRRGATMI

---



HCMV RL5A (F5HF23)

Gene: RL5A ; Protein Family: RL5A

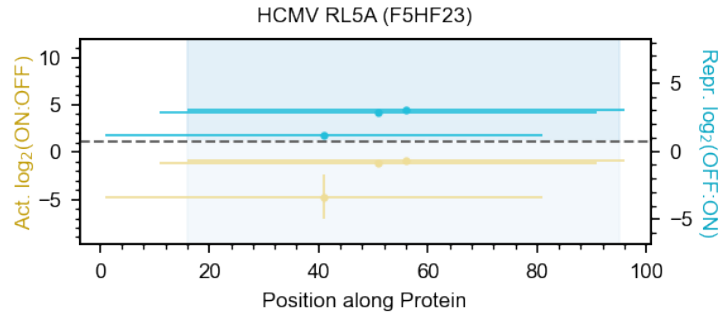

Extended repression domain from residues 1 to 95:

MDMRKLNLSQGRNLTTVDDRRRFSIGWETWDDGGESLYDVTNNGTTVINTTACVSSCSHTSLVLCNMTQQTDSLYGVGHRLNDEEDGELWRVSVS

Max tile of repression domain from residues 16 to 95 (estimated 70.0% to 72.0% of cells repressed):

TVDDRRRFSIGWETWDDGGESLYDVTNNGTTVINTTACVSSCSHTSLVLCNMTQQTDSLYGVGHRLNDEEDGELWRVSVS

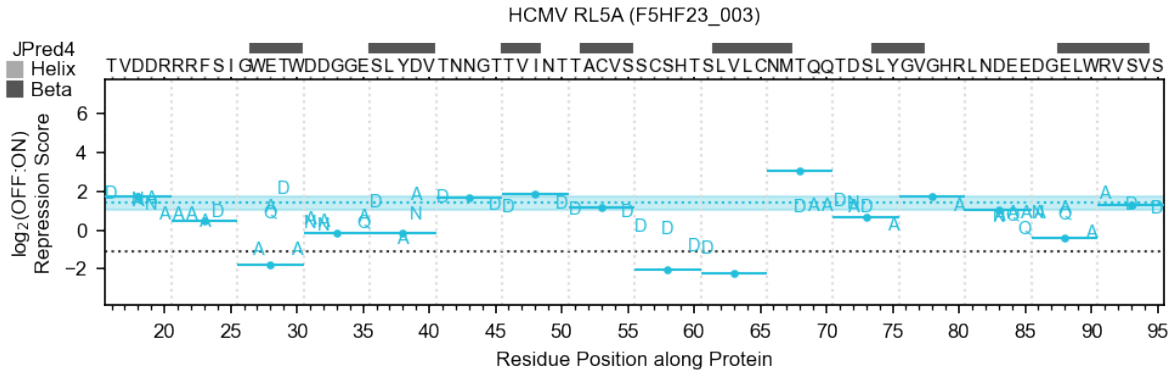

| Motif Name | Motif Start | Motif End | Motif Sequence | Overlaps Essential? | Essential Start | Essential End | Essential Sequence |
|------------|-------------|-----------|----------------|---------------------|-----------------|---------------|--------------------|
|            | -           | -         |                | No                  | 26              | 30            | GWETW              |
|            | -           | -         |                | No                  | 56              | 65            | SCSHTSLVLC         |

EBV RTA (P03209)

Gene: BRLF1 ; Protein Family: RTA

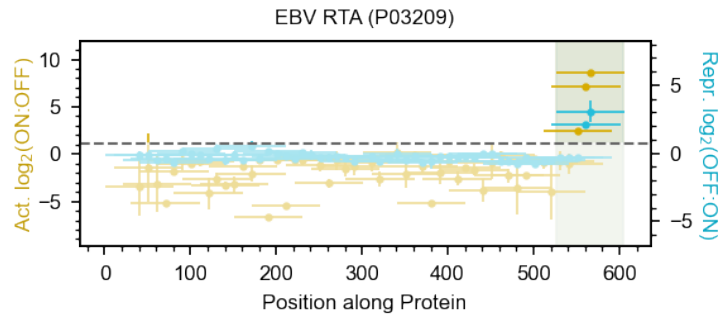

Extended repression domain from residues 521 to 605:

EMADTVIPQKEEAAICGQMDLSHPPPRGHLDLDTTLESMTEDLNLDSPLELNEILDFTLNDECLLHAMHISTGLSIFDTSLF

Max tile of repression domain from residues 526 to 605 (estimated 51.4% to 85.8% of cells repressed):

VIPQKEEAAICGQMDLSHPPPRGHLDLDTTLESMTEDLNLDSPLELNEILDFTLNDECLLHAMHISTGLSIFDTSLF

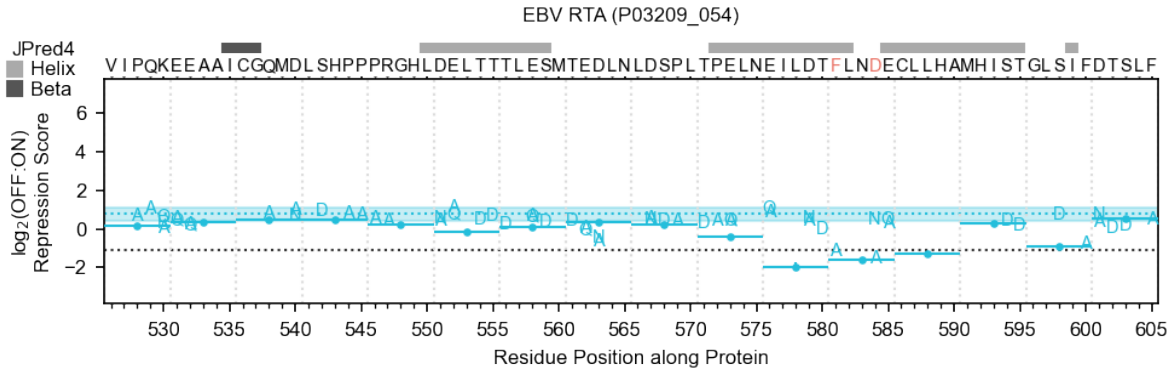

| Motif Name  | Motif Start | Motif End | Motif Sequence | Overlaps Essential? | Essential Start | Essential End | Essential Sequence |
|-------------|-------------|-----------|----------------|---------------------|-----------------|---------------|--------------------|
| WW_3        | 544         | 548       | PPPRG          | No                  | -               | -             |                    |
| flexi_NRBOX | 573         | 579       | ELNEILD        | Yes                 | 576             | 590           | EILDFTLNDECLLHA    |
| flexi_NRBOX | 577         | 583       | ILDFTLN        | Yes                 | 576             | 590           | EILDFTLNDECLLHA    |

Extended activation domain from residues 511 to 605:

ETSQAVKALREADTVIPQKEEAAICGQMDLSHPPPRGHLDLDTTLESMTEDLNLDSPLELNEILDFTLNDECLLHAMHISTGLSIFDTSLF

Max tile of activation domain from residues 526 to 605 (estimated 89.5% to 93.2% of cells activated):

VIPQKEEAAICGQMDLSHPPPRGHLDLDTTLESMTEDLNLDSPLELNEILDFTLNDECLLHAMHISTGLSIFDTSLF

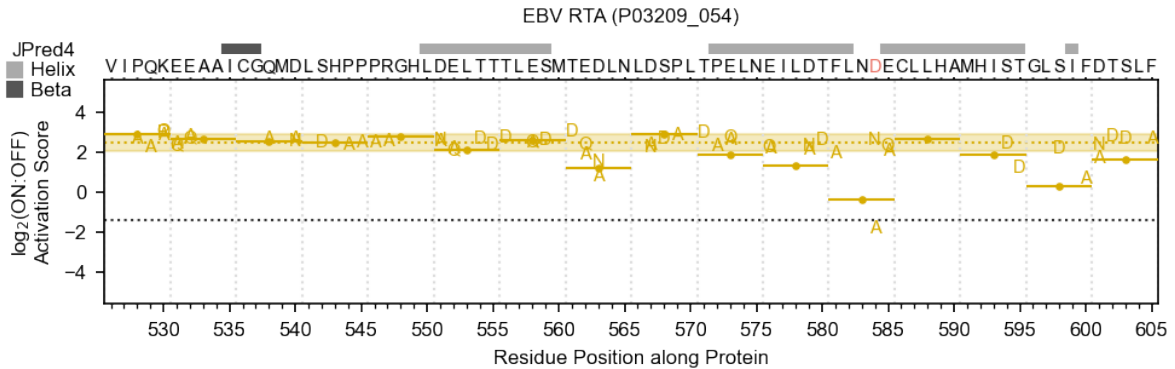

Herpesvirus Tiling and Perturbation Screen Data from Ludwig, C.H. et al. 2023

| Motif Name  | Motif Start | Motif End | Motif Sequence | Overlaps Essential? | Essential Start | Essential End | Essential Sequence |
|-------------|-------------|-----------|----------------|---------------------|-----------------|---------------|--------------------|
| WW_3        | 544         | 548       | PPPRG          | No                  | -               | -             |                    |
| flexi_NRBOX | 573         | 579       | ELNEILD        | No                  | -               | -             |                    |
| flexi_NRBOX | 577         | 583       | ILDTFNL        | No                  | -               | -             |                    |

---

KSHV RTA (F5HCV3)

Gene: ORF50 ; Protein Family: RTA

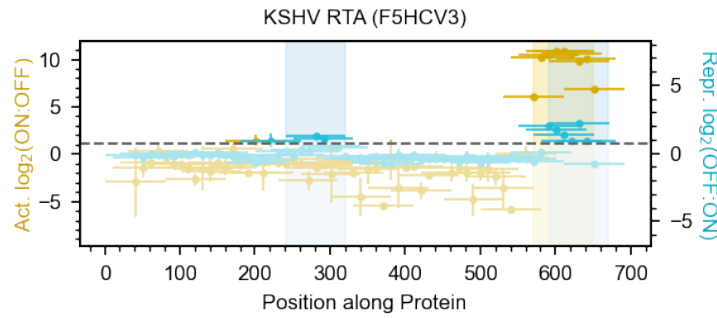

Extended repression domain from residues 241 to 330:

TGKVTGLSYPGSLMPESLILPILEPGLLPASMVDLSVDLAKPAVILSAPALSQFVISKPHPNMPHTVSIIPFNPSGTDPAFISTWQAAS

Max tile of repression domain from residues 241 to 320 (estimated 22.4% to 26.9% of cells repressed):

TGKVTGLSYPGSLMPESLILPILEPGLLPASMVDLSVDLAKPAVILSAPALSQFVISKPHPNMPHTVSIIPFNPSGTD

Extended activation domain from residues 531 to 680:

ALTVPEADTTPSTTTTPTGSLGSITTPQDVHATDVATSEGPSEAQPPLLSLPPPLDQSLFALLDEAGPETWDVGSPLSPTDDALLSSILQGLYQLDTPPP  
LRSPSPASFGPESPADIPSPSGGEYTLQLPVRATSATPANEVQESGTLY

Max tile of activation domain from residues 571 to 650 (estimated 97.2% to 97.2% of cells activated):

SEAQPPLLSLPPPLDQSLFALLDEAGPETWDVGSPLSPTDDALLSSILQGLYQLDTPPPLRSPSPASFGPESPADIPS

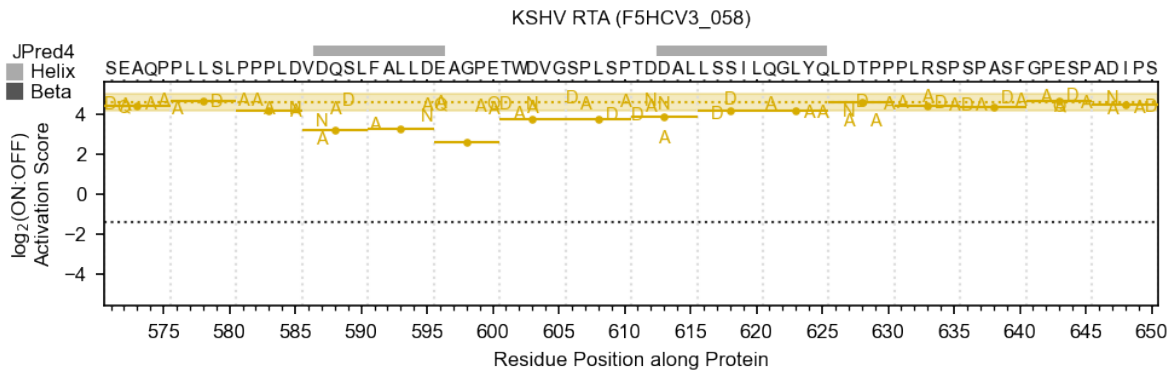

| Motif Name   | Motif Start | Motif End | Motif Sequence | Overlaps Essential? | Essential Start | Essential End | Essential Sequence |
|--------------|-------------|-----------|----------------|---------------------|-----------------|---------------|--------------------|
| SUMO_SIM_par | 582         | 587       | PPLDVD         | No                  | -               | -             |                    |
| LIG_NRBOX    | 589         | 595       | SLFALLD        | No                  | -               | -             |                    |
| flexi_NRBOX  | 615         | 621       | LLSSILQ        | No                  | -               | -             |                    |

Extended repression domain from residues 551 to 680:

GSITTPQDVHATDVATSEGPSEAQPPLLSLPPPLDQSLFALLDEAGPETWDVGSPLSPTDDALLSSILQGLYQLDTPPPLRSPSPASFGPESPADIPSP  
SGGEYTLQLPVRATSATPANEVQESGTLY

Max tile of repression domain from residues 591 to 670 (estimated 45.2% to 52.2% of cells repressed):

FALLDEAGPETWDVGSPLSPTDDALLSSILQGLYQLDTPPPLRSPSPASFGPESPADIPSPSGGEYTLQLPVRATSATPA

EBV SCAF (P03234)

Gene: BVRF2 ; Protein Family: SCAF

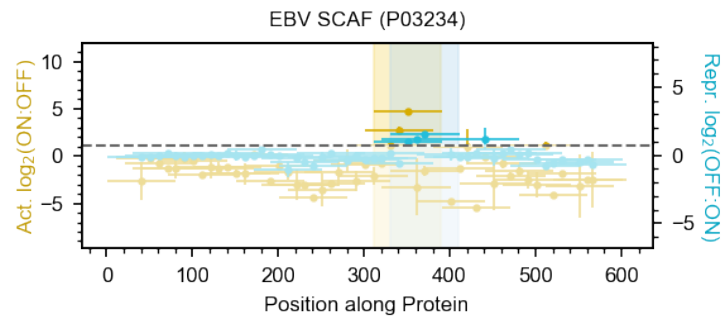

---

Extended activation domain from residues 291 to 390:

FMTLLQTNLDNKPPRQTPLPYAAPLPPFSHQAIATAPSYGPGAGAVAPAGGYFTSPGGYYAGPAGGDPGAFLAMDAHTYHHPHPPPPAYFGLPGLFGP  
PP

Max tile of activation domain from residues 311 to 390 (estimated 26.1% to 34.6% of cells activated):

YAAPLPPFSHQAIATAPSYGPGAGAVAPAGGYFTSPGGYYAGPAGGDPGAFLAMDAHTYHHPHPPPPAYFGLPGLFGPPP

---

Extended repression domain from residues 311 to 410:

YAAPLPPFSHQAIATAPSYGPGAGAVAPAGGYFTSPGGYYAGPAGGDPGAFLAMDAHTYHHPHPPPPAYFGLPGLFGPPPPVPPYYGSHLRADYVPAP  
SR

Max tile of repression domain from residues 331 to 410 (estimated 30.6% to 31.4% of cells repressed):

PGAGAVAPAGGYFTSPGGYYAGPAGGDPGAFLAMDAHTYHHPHPPPPAYFGLPGLFGPPPPVPPYYGSHLRADYVPAPSR

---

### HCMV SCAF (Q6SW62)

Gene: UL80 ; Protein Family: SCAF

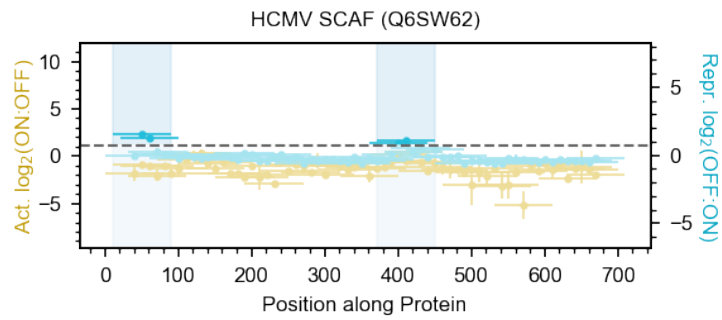

---

Extended repression domain from residues 11 to 100:

VAPVYVGGFLARYDQSPDEAELLPRDVVEHWLHAQQGQGPSLSVALPLNINHDDTAVVGHVAAMQSVRDGLFCLGCVTSPRFLEIVRRA

Max tile of repression domain from residues 11 to 90 (estimated 27.9% to 33.6% of cells repressed):

VAPVYVGGFLARYDQSPDEAELLPRDVVEHWLHAQQGQGPSLSVALPLNINHDDTAVVGHVAAMQSVRDGLFCLGCVTS

---

Extended repression domain from residues 361 to 450:

AVSSLAWPHDGVYLPKDAFFSLLGASRSAAPVMYPGAVAAPPSASPAPLPLPSYPASYGAPVVGVDQLAARHFADYVDPHYPGWGRRYEP

Max tile of repression domain from residues 371 to 450 (estimated 20.4% to 20.5% of cells repressed):

GVYLPKDAFFSLLGASRSAAPVMYPGAVAAPPSASPAPLPLPSYPASYGAPVVGVDQLAARHFADYVDPHYPGWGRRYEP

---

HHV6B SCAF (P24433)

Gene: U53 ; Protein Family: SCAF

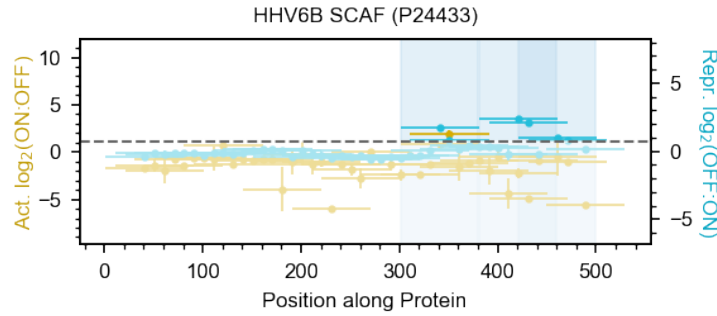

Extended repression domain from residues 301 to 390:

PFSDCVFLPKDAFFSLLNVTGQQPKIVPPVSVHPPVTEQYQMLPYSESAKIAEHESNRYHSPCQAMYYPWQYSPVPQYPAALHGYRQS

Max tile of repression domain from residues 301 to 380 (estimated 33.3% to 37.7% of cells repressed):

PFSDCVFLPKDAFFSLLNVTGQQPKIVPPVSVHPPVTEQYQMLPYSESAKIAEHESNRYHSPCQAMYYPWQYSPVPQY

Extended repression domain from residues 381 to 470:

PAALHGYRQSKTLKKRHFQSDSEDELSFPGDPEYTKRRRHRVDNDDKEMAREKNDLRELVDMIGMLRQEISALKHVRAQSPQRHIVPM

Max tile of repression domain from residues 381 to 460 (estimated 54.1% to 55.6% of cells repressed):

PAALHGYRQSKTLKKRHFQSDSEDELSFPGDPEYTKRRRHRVDNDDKEMAREKNDLRELVDMIGMLRQEISALKHVRA

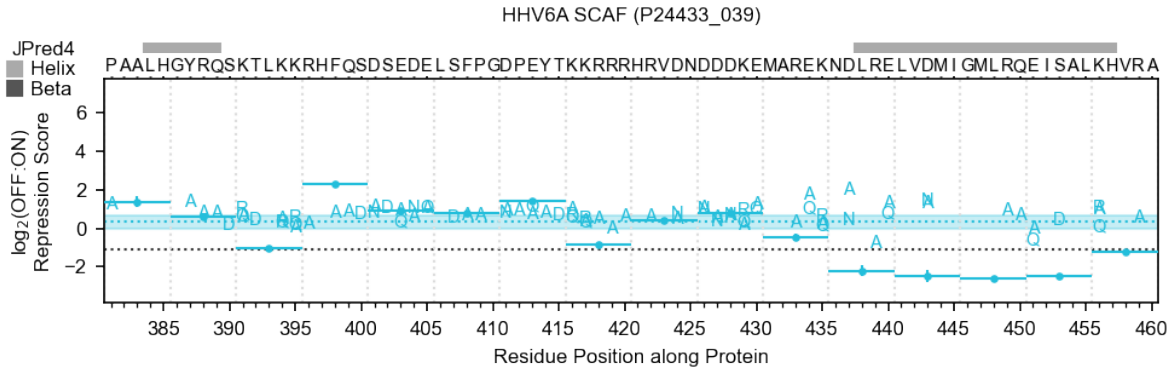

| Motif Name  | Motif Start | Motif End | Motif Sequence | Overlaps Essential? | Essential Start | Essential End | Essential Sequence        |
|-------------|-------------|-----------|----------------|---------------------|-----------------|---------------|---------------------------|
| SUMO_rev    | 424         | 431       | DNDDDKEM       | No                  | -               | -             |                           |
| flexi_NRBOX | 437         | 443       | DLRELVD        | Yes                 | 436             | 460           | NDLRELVDMIGMLRQEISALKHVRA |

Extended repression domain from residues 421 to 510:

HRVDNDDDKEMAREKNDLRELVDMIGMLRQEISALKHVRAQSPQRHIVPMETLPTIEEKGASPKPSILNASLAPETVNRSLAGQNESTD

Max tile of repression domain from residues 421 to 500 (estimated 16.9% to 22.9% of cells repressed):

HRVDNDDDKEMAREKNDLRELVDMIGMLRQEISALKHVRAQSPQRHIVPMETLPTIEEKGASPKPSILNASLAPETVNR

HHV7 SCAF (P52351)

Gene: U53 ; Protein Family: SCAF

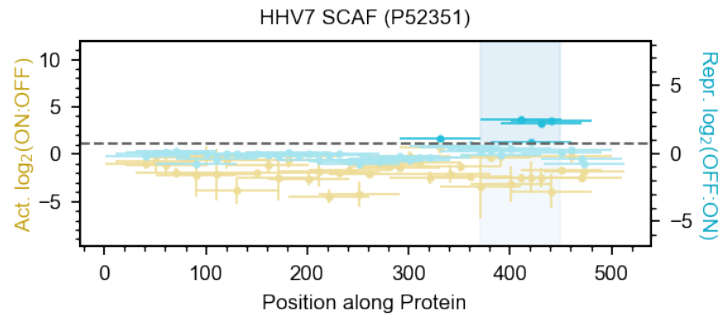

Extended repression domain from residues 371 to 480:

NYKSYRGSQKRCAPTDSDDEMSFPDYPDYTTKTKKRYREDDRELTKDKNDIKELVDAIGMLRHEISALKYIRSQSPQRQHCTAVDTMPTIEEKNVASKPSVNASLTP

Max tile of repression domain from residues 371 to 450 (estimated 54.8% to 57.3% of cells repressed):

NYKSYRGSQKRCAPTDSDDEMSFPDYPDYTTKTKKRYREDDRELTKDKNDIKELVDAIGMLRHEISALKYIRSQSPQRQ

Extended repression domain from residues 371 to 480:

NYKSYRGSQKRCAPTDSDDEMSFPDYPDYTTKTKKRYREDDRELTKDKNDIKELVDAIGMLRHEISALKYIRSQSPQRQHCTAVDTMPTIEEKNVASKPSVNASLTP

Max tile of repression domain from residues 401 to 480 (estimated 54.3% to 54.4% of cells repressed):

TKKKKRYREDDRELTKDKNDIKELVDAIGMLRHEISALKYIRSQSPQRQHCTAVDTMPTIEEKNVASKPSVNASLTP

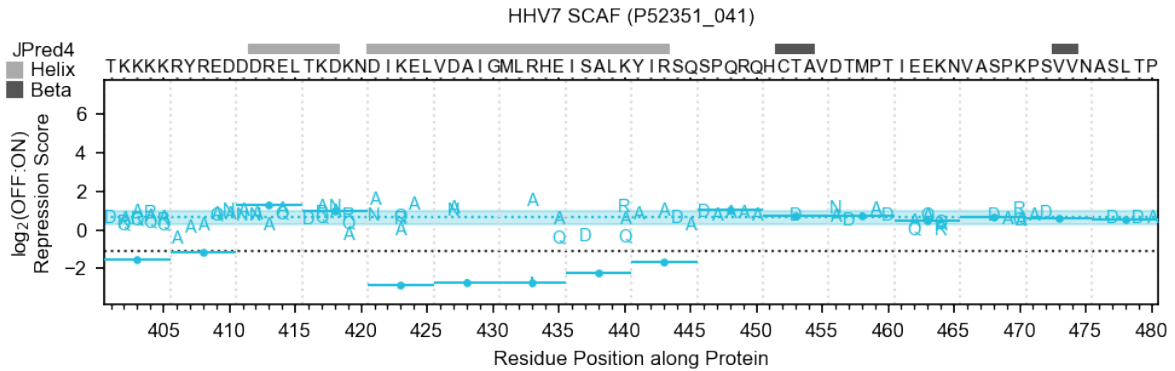

| Motif Name  | Motif Start | Motif End | Motif Sequence | Overlaps Essential? | Essential Start | Essential End | Essential Sequence        |
|-------------|-------------|-----------|----------------|---------------------|-----------------|---------------|---------------------------|
|             | -           | -         |                | No                  | 401             | 410           | TKKKKRYRED                |
| SUMO_rev    | 418         | 425       | DKNDIKEL       | Yes                 | 421             | 445           | DIKELVDAIGMLRHEISALKYIRSQ |
| flexi_NRBOX | 421         | 427       | DIKELVD        | Yes                 | 421             | 445           | DIKELVDAIGMLRHEISALKYIRSQ |
| SUMO_rev    | 456         | 466       | DTMPTIEEKNV    | No                  | -               | -             |                           |



KSHV SCAF (Q2HRB6)

Gene: ORF17 ; Protein Family: SCAF

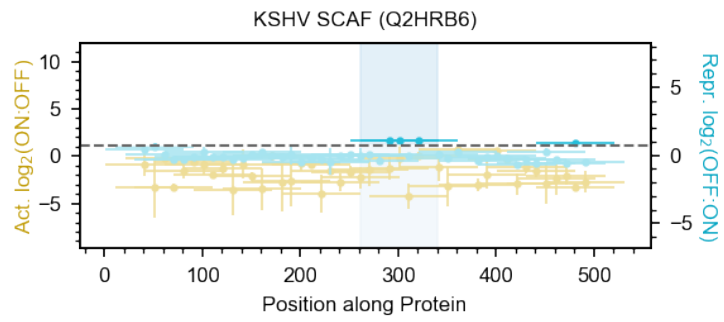

---

Extended repression domain from residues 251 to 340:

GQEDIISIPKSAFLSMLQSSIDGMKTTAAKMSHTLSGPGLMGCGQMFPDHHLPSYVSNPAPPYGYAYKNPYDPWYYSPQLPGYRTGKR

Max tile of repression domain from residues 261 to 340 (estimated 17.0% to 25.2% of cells repressed):

SAFLSMLQSSIDGMKTTAAKMSHTLSGPGLMGCGQMFPDHHLPSYVSNPAPPYGYAYKNPYDPWYYSPQLPGYRTGKR

---

VZV SCAF (P09286)

Gene: ORF33 ; Protein Family: SCAF

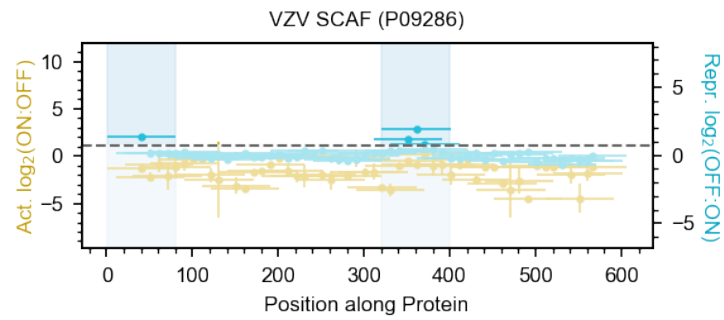

---

Extended repression domain from residues 1 to 80:

MAAEADEENCEALYVAGYLALYSKDEGELNITPEIVRSALPPTSKIPINIDHRKDCVVGEVIAIIEDIRGPFFLGIVRCP

Max tile of repression domain from residues 1 to 80 (estimated 25.0% to 30.9% of cells repressed):

MAAEADEENCEALYVAGYLALYSKDEGELNITPEIVRSALPPTSKIPINIDHRKDCVVGEVIAIIEDIRGPFFLGIVRCP

---

Extended repression domain from residues 311 to 410:

ASNISQPPSGVPTGGFVLIPTAYYSQLLTGQTKNPQVSIGAPNNGQYIVGYPYGSPPHAFPPNTGGYGCPPGHFGGPPYGFPGYPPPNRLEMQMSAF  
MN

Max tile of repression domain from residues 321 to 400 (estimated 39.9% to 43.0% of cells repressed):

GVPTGGFVLIPTAYYSQLLTGQTKNPQVSIGAPNNGQYIVGYPYGSPPHAFPPNTGGYGCPPGHFGGPPYGFPGYPPPNR

---

KSHV TRM1 (Q2HRD2)

Gene: ORF7 ; Protein Family: TRM1

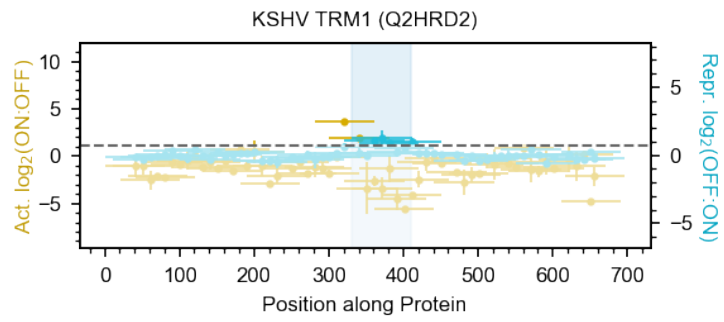

---

Extended repression domain from residues 321 to 420:

GCLGERGTPKHFFDCFRPDSLETLFCGGLFSSVEDTIESLQKDCSSAFYQQVNYTTALQKQNEFYVRLSKLLAAGQLNLGKCSTESCPSEARRQLVGGDK

Max tile of repression domain from residues 331 to 410 (estimated 15.0% to 37.8% of cells repressed):

HFFDCFRPDSLETLFCGGLFSSVEDTIESLQKDCSSAFYQQVNYTTALQKQNEFYVRLSKLLAAGQLNLGKCSTESCPSE

---

### HCMV TRM2 (F5HG19)

Gene: UL51 ; Protein Family: TRM2

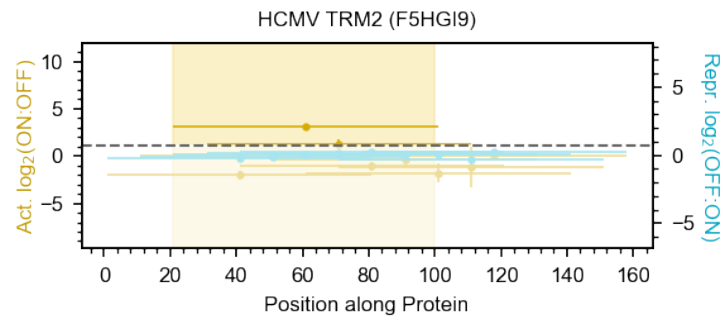

---

Extended activation domain from residues 21 to 110:

DVQDDVDSPVTRPLVIDEDAEPAAAGTSGGLEGGGGDEDEDGEDGHALPDLDDDLLLQFEPMLPRVYDLLPSLDARLNFNAGQKYAFL

Max tile of activation domain from residues 21 to 100 (estimated 8.5% to 9.9% of cells activated):

DVQDDVDSPVTRPLVIDEDAEPAAAGTSGGLEGGGGDEDEDGEDGHALPDLDDDLLLQFEPMLPRVYDLLPSLDARLNFV

---

KSHV TRM3 (F5HGB6)

Gene: ORF29 ; Protein Family: TRM3

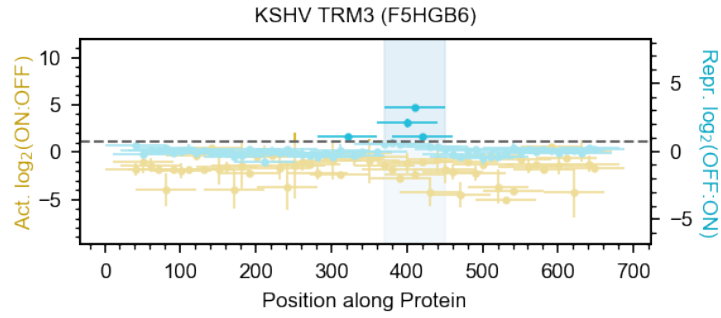

Extended repression domain from residues 361 to 460:

LNLRNAQEKMLNVVSYVCADHREDFHLQDALVSCPCYRLHIPTYITIDESIKTTTNLFMEGAFDTELMGEGAASSNATLYRVVGDAAALTQFDMCRVDTTA

Max tile of repression domain from residues 371 to 450 (estimated 73.2% to 77.6% of cells repressed):

LNVVSYVCADHREDFHLQDALVSCPCYRLHIPTYITIDESIKTTTNLFMEGAFDTELMGEGAASSNATLYRVVGDAAALTQ

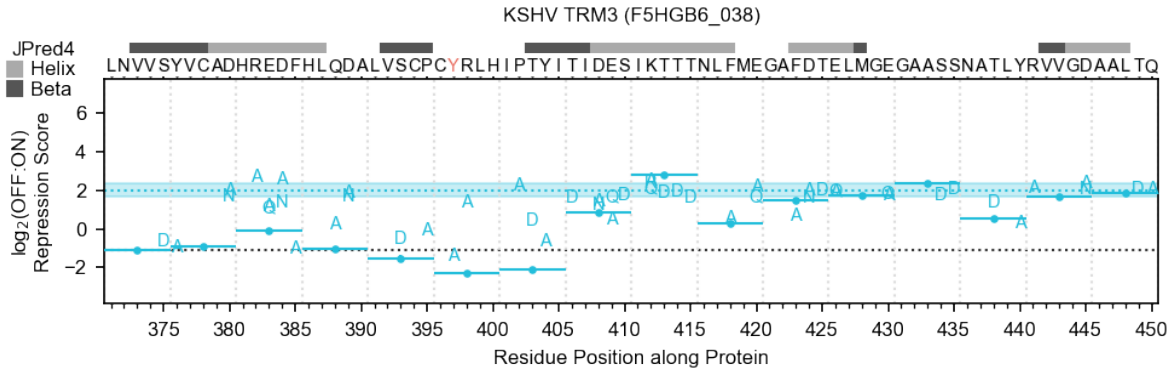

| Motif Name  | Motif Start | Motif End | Motif Sequence | Overlaps Essential? | Essential Start | Essential End | Essential Sequence |
|-------------|-------------|-----------|----------------|---------------------|-----------------|---------------|--------------------|
| flexi_NRBOX | 372         | 378       | NVVSVC         | Yes                 | 371             | 375           | LNVVS              |
|             | -           | -         |                | No                  | 391             | 405           | LVSCPCYRLHIPTYI    |
| flexi_NRBOX | 438         | 444       | TLYRVVG        | No                  | -               | -             |                    |

HCMV TRS1 (P09695)

Gene: TRS1 ; Protein Family: TRS1

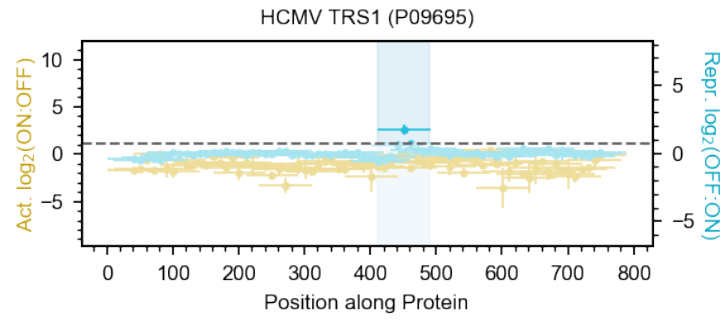

---

Extended repression domain from residues 411 to 500:

AAGGGAICVPNADAHAVVGADAAAAAAPTVMVGSTAMAGPAASGTVPRAMLVLLDELGAVFGYCPLDGHVYPLAAELSHFLRAGVLGAL

Max tile of repression domain from residues 411 to 490 (estimated 27.2% to 46.4% of cells repressed):

AAGGGAICVPNADAHAVVGADAAAAAAPTVMVGSTAMAGPAASGTVPRAMLVLLDELGAVFGYCPLDGHVYPLAAELSH

---

### HCMV TRS1 (Q6SVX2)

Gene: TRS1 ; Protein Family: TRS1

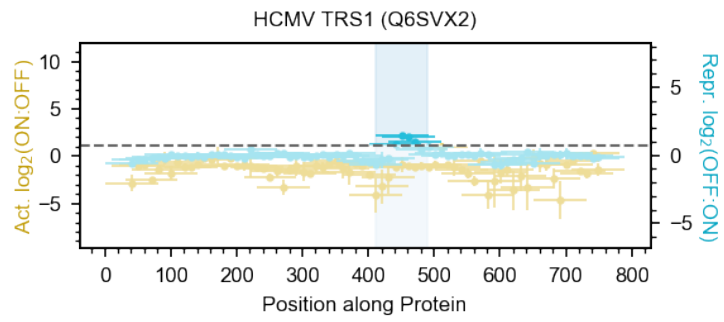

---

Extended repression domain from residues 401 to 510:

PPQPYGGAGGSAICVPNADAHAVVGADATAAAAAAAAAAAPTVMVGPTAMAGPAASGTVPRAMLVVVLDELGAVFGYCPLDGHVYPLAAELSHFLRAGVL  
GALALGRESAPA

Max tile of repression domain from residues 411 to 490 (estimated 27.4% to 31.6% of cells repressed):

SAICVPNADAHAVVGADATAAAAAAAAAAAPTVMVGPTAMAGPAASGTVPRAMLVVVLDELGAVFGYCPLDGHVYPLAAELS

---

### HCMV TRX1 (P16783)

Gene: UL46 ; Protein Family: TRX1

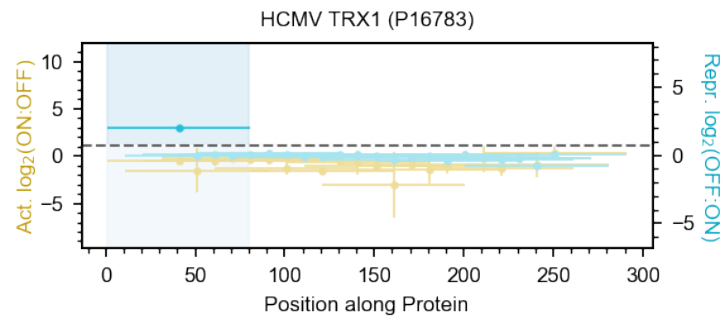

---

Extended repression domain from residues 1 to 80:

MDARAVAKRPRDPADEDNELVTALKAKREVENTISVRVLYHADHQALTARFFVPEGLVEFEAQPGALLIRMETGCDSRHL

Max tile of repression domain from residues 1 to 80 (estimated 42.6% to 43.7% of cells repressed):

MDARAVAKRPRDPADEDNELVTALKAKREVENTISVRVLYHADHQALTARFFVPEGLVEFEAQPGALLIRMETGCDSRHL

---



HHV6B U4 (Q9QJ55)

Gene: U4 ; Protein Family: U4

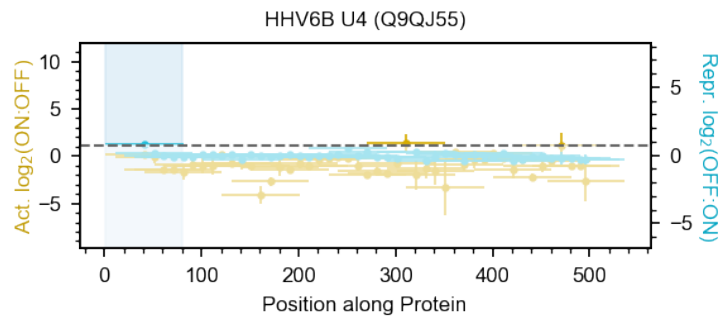

---

Extended repression domain from residues 1 to 80:

MELLDHDIYKGPVRERVTYITIPNHPYLSLTVHHSRELDVLDKDITEEMIIDSGTLTAEDLFMTRGLRFCDDSVLWAALAE

Max tile of repression domain from residues 1 to 80 (estimated 13.6% to 17.0% of cells repressed):

MELLDHDIYKGPVRERVTYITIPNHPYLSLTVHHSRELDVLDKDITEEMIIDSGTLTAEDLFMTRGLRFCDDSVLWAALAE

---

HHV6A U79 (P52529)

Gene: U79/U80 ; Protein Family: U79

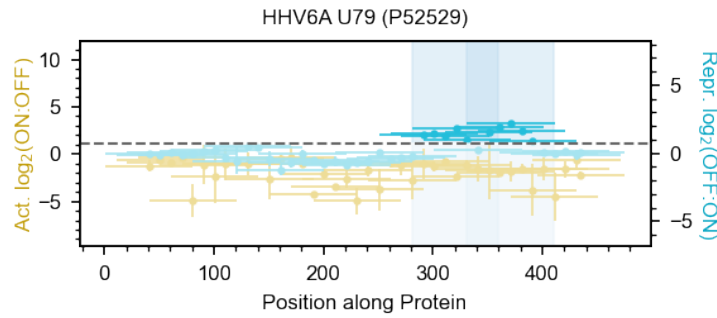

Extended repression domain from residues 251 to 370:

ALPPCISIDNHEDQQHDELDKRAYAAGGTNREGLSNEDNYGNFRLNKSLEQLRAKLVASSGDIVERSLLKLKECLDNVKDNLKNECADVTGPSKCLSKTKHIEPKKQIVFSDCVRPVPVC

Max tile of repression domain from residues 281 to 360 (estimated 36.5% to 43.5% of cells repressed):

EGLSNEDNYGNFRLNKSLEQLRAKLVASSGDIVERSLLKLKECLDNVKDNLKNECADVTGPSKCLSKTKHIEPKKQIVF

Extended repression domain from residues 311 to 430:

DIVERSLLKLKECLDNVKDNLKNECADVTGPSKCLSKTKHIEPKKQIVFSDCVRPVPVCEIKPFIDVRLFETARSPRRLRQRTRTIVGSTDGAIEQQRVISGQNRGRARGRGRGRAPRR

Max tile of repression domain from residues 331 to 410 (estimated 46.7% to 52.4% of cells repressed):

LIKNECADVTGPSKCLSKTKHIEPKKQIVFSDCVRPVPVCEIKPFIDVRLFETARSPRRLRQRTRTIVGSTDGAIEQQRV

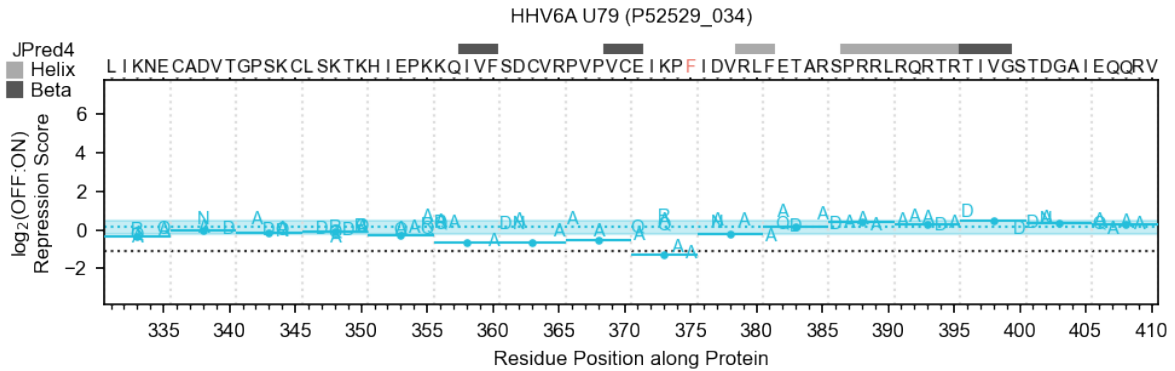

| Motif Name | Motif Start | Motif End | Motif Sequence | Overlaps Essential? | Essential Start | Essential End | Essential Sequence |
|------------|-------------|-----------|----------------|---------------------|-----------------|---------------|--------------------|
| SUMO_for   | 332         | 335       | IKNE           | No                  | -               | -             |                    |
|            | -           | -         |                | No                  | 371             | 375           | EIKPF              |

HHV6B U79 (Q96896)

Gene: U79/U80 ; Protein Family: U79

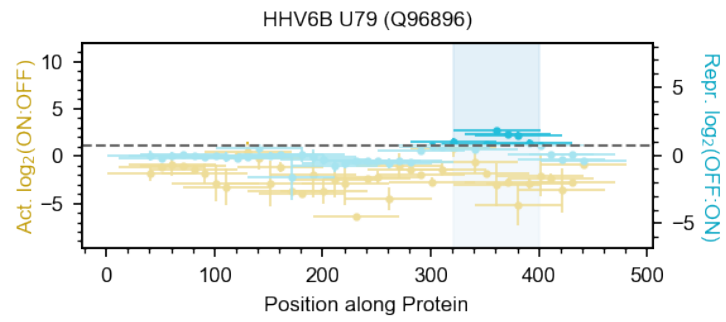

---

Extended repression domain from residues 311 to 430:

GEVVERSLSKLKERLDYVKDNLKLVLECADVTVPSKCLSKTKHIEQKKQIVFSDCVRSVPVCEIKPFIDMRVFETETTQNARRVRQRTRTTVGSTDGAIG  
QQRVISGQNRGRARGRGRG

Max tile of repression domain from residues 321 to 400 (estimated 36.6% to 39.5% of cells repressed):

LKERLDYVKDNLKLVLECADVTVPSKCLSKTKHIEQKKQIVFSDCVRSVPVCEIKPFIDMRVFETETTQNARRVRQRTR

---

HHV6B U84 (P52533)

Gene: U84 ; Protein Family: U84

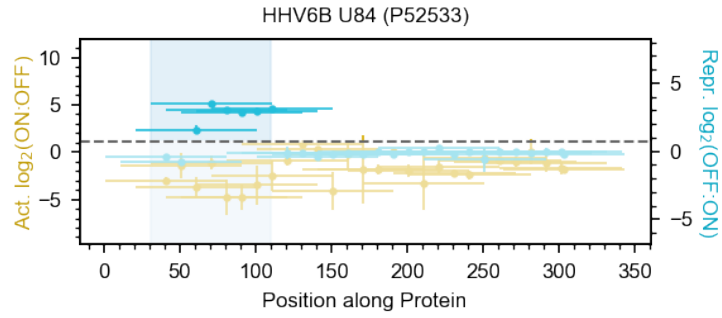

Extended repression domain from residues 21 to 150:

TRKTTKPSTERKKNVTTKTTIRNNRLQNNLSSQTVQTDKPVDSATARAFPQHTSPDIKFNKEKYRNNAIYAHSKLRKISNAVFHQDKEINRFSFTDKPLA  
DLSFNMPVKSTTTQKKEIVKSTECQRQDP

Max tile of repression domain from residues 31 to 110 (estimated 77.5% to 84.1% of cells repressed):

RKKNVTTKTTIRNNRLQNNLSSQTVQTDKPVDSATARAFPQHTSPDIKFNKEKYRNNAIYAHSKLRKISNAVFHQDKEIN

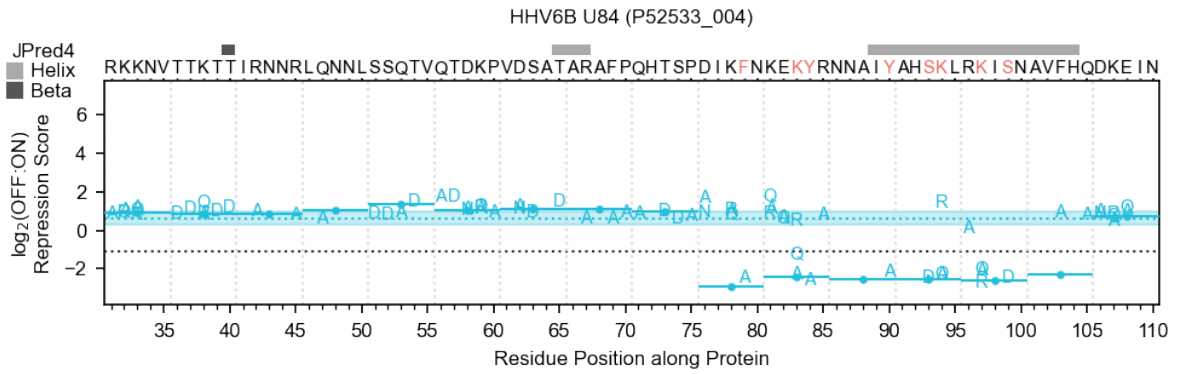

| Motif Name | Motif Start | Motif End | Motif Sequence | Overlaps Essential? | Essential Start | Essential End | Essential Sequence                 |
|------------|-------------|-----------|----------------|---------------------|-----------------|---------------|------------------------------------|
| SUMO_rev   | 74          | 79        | SPDIKF         | Yes                 | 76              | 105           | DIKFNKEKYRNNAIYAHSKLRK<br>ISNAVFHQ |

HHV7 U84 (P52534)

Gene: U84 ; Protein Family: U84

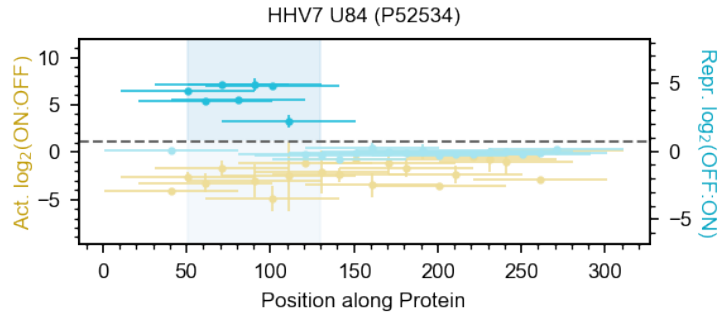

Extended repression domain from residues 11 to 150:

KAKGKLTSKSCMCTKANARYTCNCFSKTLPFNEKAIKCTIPEKINSEINISKSEMLLKADKYTNAIYKHSKLRKIFKAVKENLSTTNFATKSKGIVHSNFNSDKPIHSPEIKNYTDFNCFDMHPCGLCSPKNFLSEVYKL

Max tile of repression domain from residues 51 to 130 (estimated 92.6% to 97.9% of cells repressed):

PEKINSEINISKSEMLLKADKYTNAIYKHSKLRKIFKAVKENLSTTNFATKSKGIVHSNFNSDKPIHSPEIKNYTDFNCF

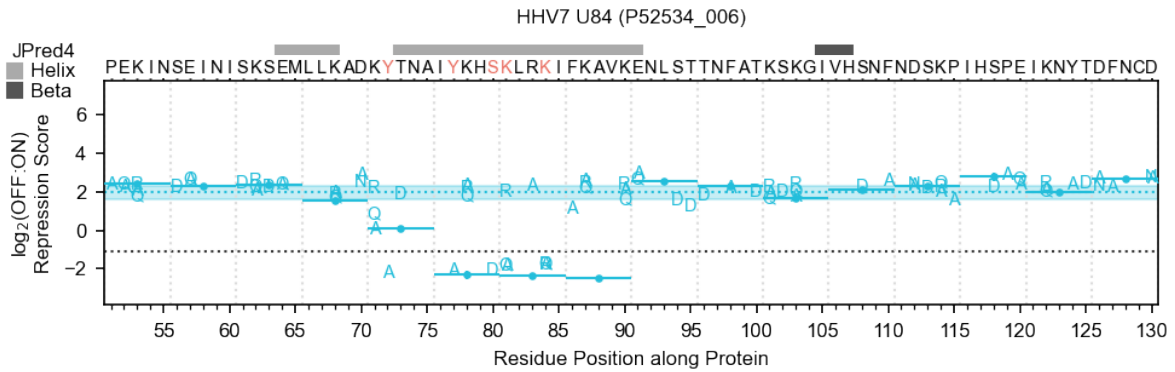

| Motif Name  | Motif Start | Motif End | Motif Sequence | Overlaps Essential? | Essential Start | Essential End | Essential Sequence |
|-------------|-------------|-----------|----------------|---------------------|-----------------|---------------|--------------------|
| flexi_NRBOX | 81          | 87        | KLRKIFK        | Yes                 | 76              | 90            | IYKHSKLRKIFKAVK    |
| SUMO_rev    | 108         | 116       | SNFNDSKPI      | No                  | -               | -             |                    |

HHV7 U8 (P52523)

Gene: U8 ; Protein Family: U8

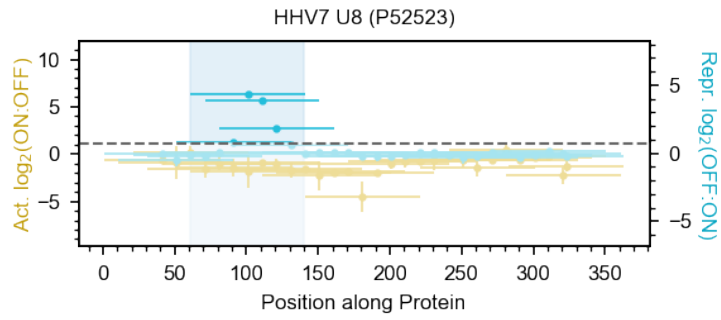

Extended repression domain from residues 51 to 160:

CLSLIWPKNLWLRLAQPV DVAGYSEQQLAELNDHYQGFKENLCLIGAIQIGRKDVPIFVGKSSRIFCHDLEDDVLYYIAEDFDKFVRFGLGTNVITCSEPVYTRFYDYG

Max tile of repression domain from residues 61 to 140 (estimated 91.1% to 91.4% of cells repressed):

WLRLAQPV DVAGYSEQQLAELNDHYQGFKENLCLIGAIQIGRKDVPIFVGKSSRIFCHDLEDDVLYYIAEDFDKFVRFGL

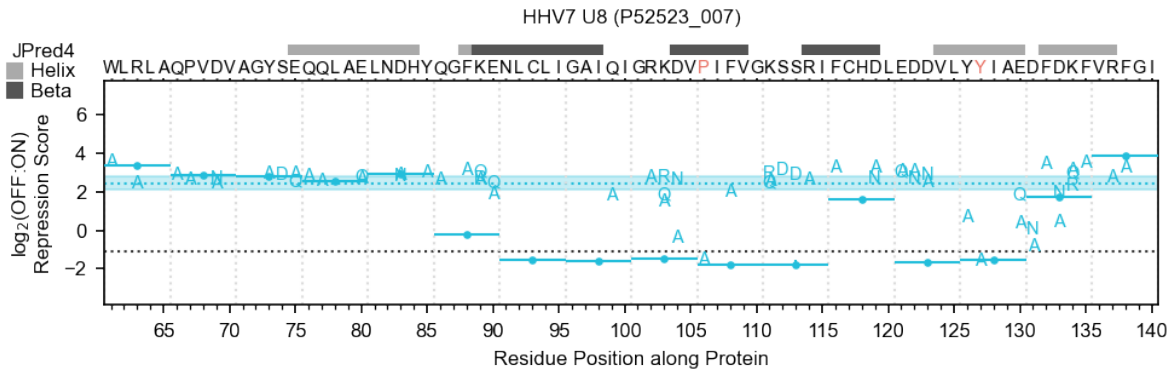

| Motif Name  | Motif Start | Motif End | Motif Sequence | Overlaps Essential? | Essential Start | Essential End | Essential Sequence        |
|-------------|-------------|-----------|----------------|---------------------|-----------------|---------------|---------------------------|
| -           | -           | -         |                | No                  | 91              | 115           | NLCLIGAIQIGRKDVPIFVGKSSRI |
| flexi_NRBOX | 123         | 129       | DVLYYIA        | Yes                 | 121             | 130           | EDDVLYYIAE                |
| flexi_NRBOX | 131         | 137       | DFDKFVR        | No                  | -               | -             |                           |

HHV6A U95 (Q89882)

Gene: U95 ; Protein Family: U95

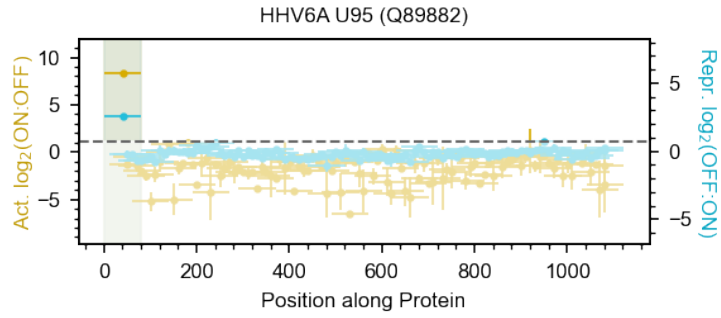

Extended repression domain from residues 1 to 80:

MSAHPDDLFWQQILNMDPTELLSDDVISSTCDENTAAGTDIMQPLCVDMSVQPTTSGCHTGAMMSDSYFSNDTPDQNCQS

Max tile of repression domain from residues 1 to 80 (estimated 58.2% to 60.7% of cells repressed):

MSAHPDDLFWQQILNMDPTELLSDDVISSTCDENTAAGTDIMQPLCVDMSVQPTTSGCHTGAMMSDSYFSNDTPDQNCQS

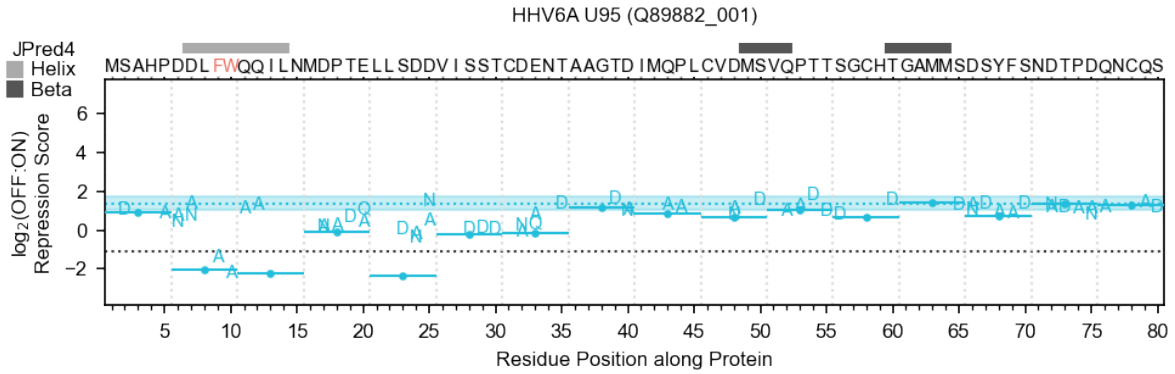

| Motif Name    | Motif Start | Motif End | Motif Sequence | Overlaps Essential? | Essential Start | Essential End | Essential Sequence |
|---------------|-------------|-----------|----------------|---------------------|-----------------|---------------|--------------------|
| CtBP_expanded | 5           | 9         | PDDLDF         | Yes                 | 6               | 15            | DDLFWQQILN         |
| flexi_NRBOX   | 9           | 15        | FWQQILN        | Yes                 | 6               | 15            | DDLFWQQILN         |
| CtBP_expanded | 18          | 22        | PTELL          | Yes                 | 21              | 25            | LLSDD              |

Extended activation domain from residues 1 to 80:

MSAHPDDLFWQQILNMDPTELLSDDVISSTCDENTAAGTDIMQPLCVDMSVQPTTSGCHTGAMMSDSYFSNDTPDQNCQS

Max tile of activation domain from residues 1 to 80 (estimated 87.9% to 91.4% of cells activated):

MSAHPDDLFWQQILNMDPTELLSDDVISSTCDENTAAGTDIMQPLCVDMSVQPTTSGCHTGAMMSDSYFSNDTPDQNCQS

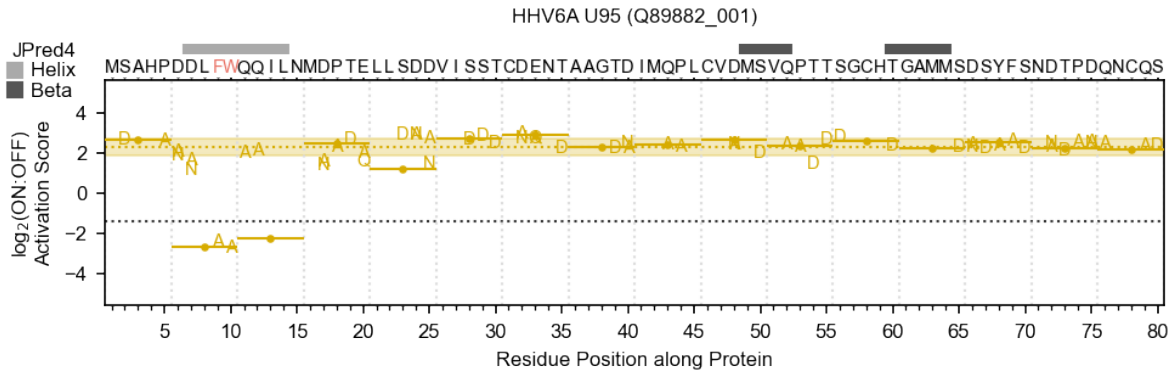

Herpesvirus Tiling and Perturbation Screen Data from Ludwig, C.H. et al. 2023

| Motif Name    | Motif Start | Motif End | Motif Sequence | Overlaps Essential? | Essential Start | Essential End | Essential Sequence |
|---------------|-------------|-----------|----------------|---------------------|-----------------|---------------|--------------------|
| CtBP_expanded | 5           | 9         | PDDLf          | Yes                 | 6               | 15            | DDLFWQQILN         |
| flexi_NRBOX   | 9           | 15        | FWQQILN        | Yes                 | 6               | 15            | DDLFWQQILN         |
| CtBP_expanded | 18          | 22        | PTELL          | No                  | -               | -             |                    |

---



HHV6B U95 (Q9QJ12)

Gene: U95 ; Protein Family: U95

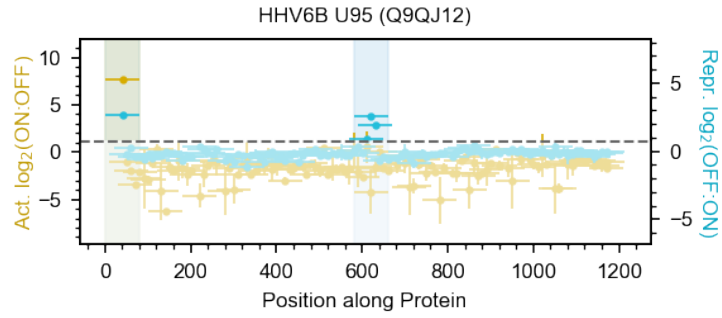

Extended repression domain from residues 1 to 80:

MSSNLEDLLWQQILSMDPAELLSDNAISSTCDENIAAGHHFTQSPHVEMSVQSTTSAGHTGVMTTQSQFSNGVRDQNRRES

Max tile of repression domain from residues 1 to 80 (estimated 58.9% to 62.9% of cells repressed):

MSSNLEDLLWQQILSMDPAELLSDNAISSTCDENIAAGHHFTQSPHVEMSVQSTTSAGHTGVMTTQSQFSNGVRDQNRRES

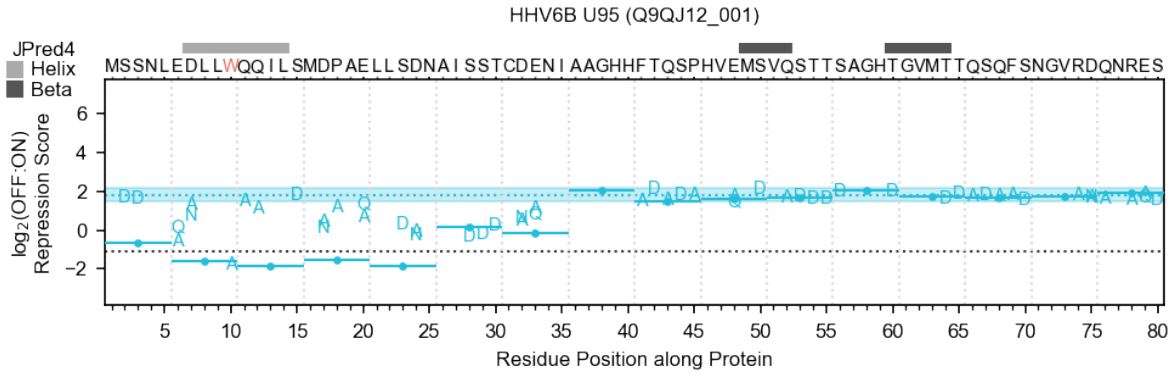

| Motif Name    | Motif Start | Motif End | Motif Sequence | Overlaps Essential? | Essential Start | Essential End | Essential Sequence   |
|---------------|-------------|-----------|----------------|---------------------|-----------------|---------------|----------------------|
| LIG_NRBOX     | 4           | 10        | NLEDLLW        | Yes                 | 6               | 25            | EDLLWQQILSMDPAELLSDN |
| CtBP_expanded | 18          | 22        | PAELL          | Yes                 | 6               | 25            | EDLLWQQILSMDPAELLSDN |
| flexi_NRBOX   | 9           | 15        | LWQQILS        | Yes                 | 6               | 25            | EDLLWQQILSMDPAELLSDN |

Extended activation domain from residues 1 to 80:

MSSNLEDLLWQQILSMDPAELLSDNAISSTCDENIAAGHHFTQSPHVEMSVQSTTSAGHTGVMTTQSQFSNGVRDQNRRES

Max tile of activation domain from residues 1 to 80 (estimated 83.1% to 84.0% of cells activated):

MSSNLEDLLWQQILSMDPAELLSDNAISSTCDENIAAGHHFTQSPHVEMSVQSTTSAGHTGVMTTQSQFSNGVRDQNRRES

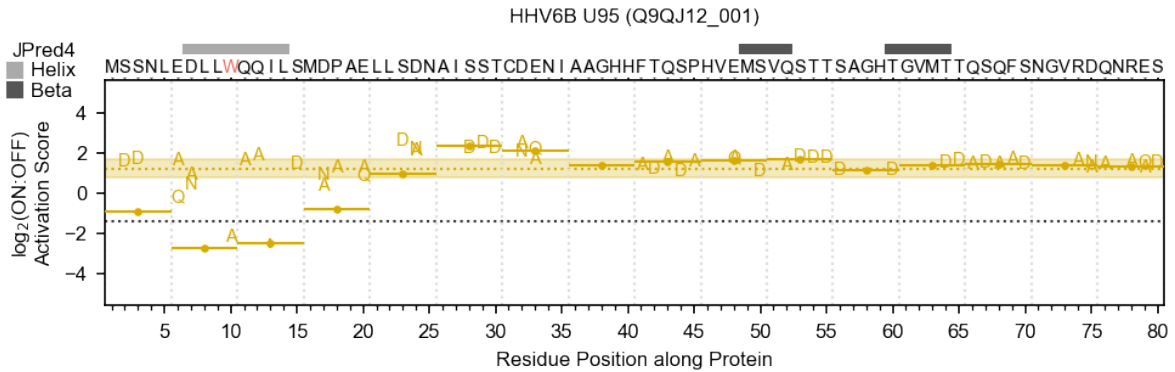

Herpesvirus Tiling and Perturbation Screen Data from Ludwig, C.H. et al. 2023

| Motif Name    | Motif Start | Motif End | Motif Sequence | Overlaps Essential? | Essential Start | Essential End | Essential Sequence |
|---------------|-------------|-----------|----------------|---------------------|-----------------|---------------|--------------------|
| LIG_NRBOX     | 4           | 10        | NLEDLLW        | Yes                 | 6               | 15            | EDLLWQQILS         |
| flexi_NRBOX   | 9           | 15        | LWQQILS        | Yes                 | 6               | 15            | EDLLWQQILS         |
| CtBP_expanded | 18          | 22        | PAELL          | No                  | -               | -             |                    |

Extended repression domain from residues 571 to 670:

NKDVCKPTPSLRAIKKLNFDYDDRGENIGFPSKLAALLSMGENMSKMDNPCYGTSLAQFEESHQQNASEGKISIA DLEFSEEDDVLSSAASVSCNDNCV  
M

Max tile of repression domain from residues 581 to 660 (estimated 55.7% to 61.2% of cells repressed):

LRAIKKLNFDYDDRGENIGFPSKLAALLSMGENMSKMDNPCYGTSLAQFEESHQQNASEGKISIA DLEFSEEDDVLSSAA

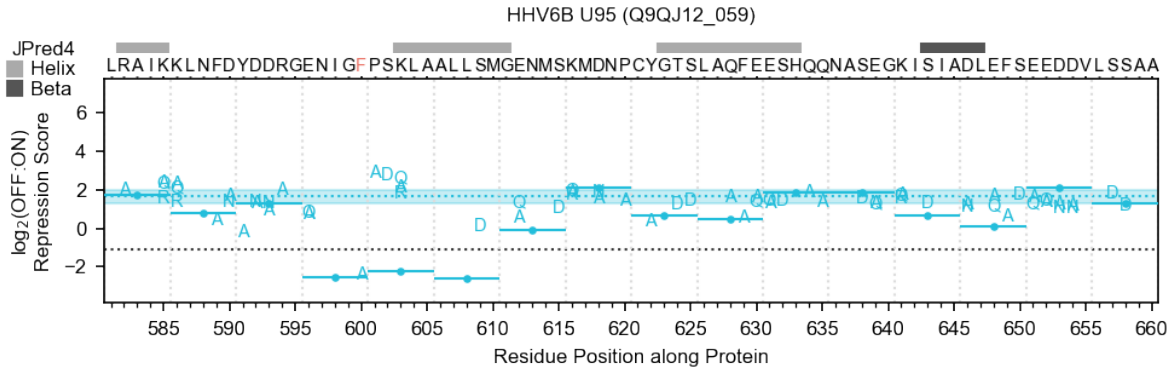

| Motif Name | Motif Start | Motif End | Motif Sequence | Overlaps Essential? | Essential Start | Essential End | Essential Sequence |
|------------|-------------|-----------|----------------|---------------------|-----------------|---------------|--------------------|
| LIG_NRBOX  | 603         | 609       | KLAALLS        | Yes                 | 596             | 610           | ENIGFPSKLAALLSM    |
| SUMO_rev   | 638         | 643       | SEGKIS         | No                  | -               | -             |                    |

HCMV UL117 (P16770)

Gene: UL117 ; Protein Family: UL117

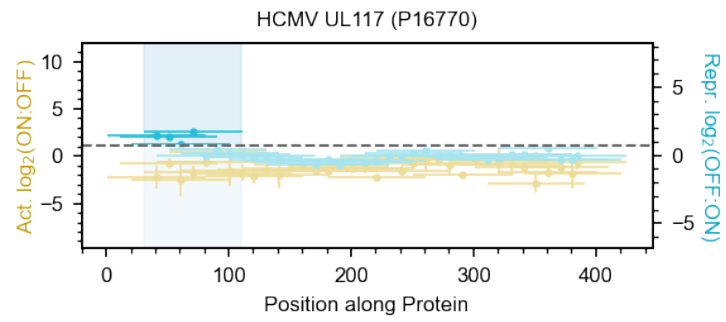

---

Extended repression domain from residues 1 to 110:

MVMFSQDHSVQIVYGSTRICKSLAPANRKRKTHRTIVVAPRRGFLRIPPDGQDVNHVKIVPTTSSSLAPPRDDERRPTPLRPPLTVYPYGTSLIRRSARDAK  
LRSKLIVFH

Max tile of repression domain from residues 31 to 110 (estimated 34.3% to 38.0% of cells repressed):

HRTIVVAPRRGFLRIPPDGQDVNHVKIVPTTSSSLAPPRDDERRPTPLRPPLTVYPYGTSLIRRSARDAKLRSKLIVFH

---



HCMV UL132 (F5HGU6)  
Gene: UL132 ; Protein Family: UL132

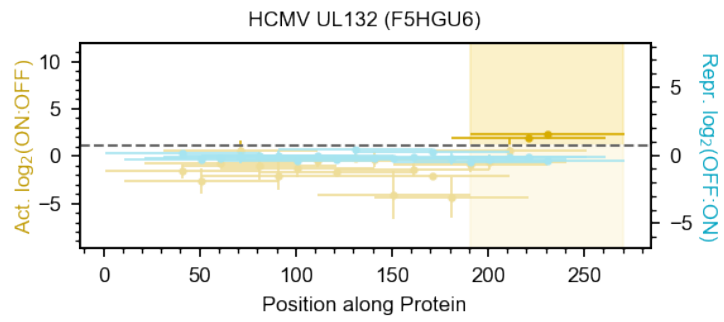

---

Extended activation domain from residues 181 to 270:

KHDPENVIYFRKDGNDTSFVNPNYGRGSPLTIESHLSDNNEEDPIRYYSVYDELTAEMEEPSNSTSWQIPKLMKVAMQPVSLRDPEYD

Max tile of activation domain from residues 191 to 270 (estimated 4.7% to 6.0% of cells activated):

RKDGNDTSFVNPNYGRGSPLTIESHLSDNNEEDPIRYYSVYDELTAEMEEPSNSTSWQIPKLMKVAMQPVSLRDPEYD

---

HCMV UL18 (P08560)

Gene: UL18 ; Protein Family: UL18

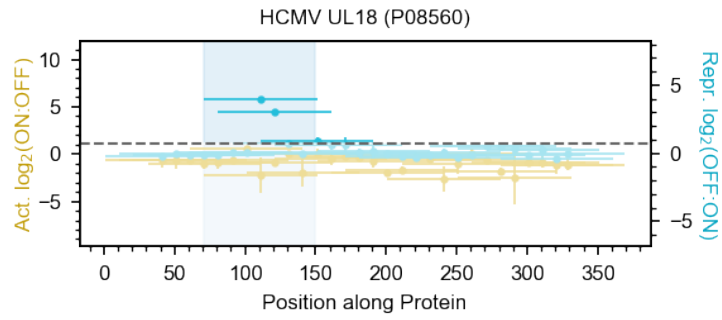

Extended repression domain from residues 71 to 170:

WMANVSAAYPTYLDGERAKGDLIFNQTEQNLLLELEIALGYRSQSVLWTWHECNTTENGFSVAGYEGFGWDGETLMELKDNLTWTPNYEISWLKQNK  
TY

Max tile of repression domain from residues 71 to 150 (estimated 87.5% to 88.6% of cells repressed):

WMANVSAAYPTYLDGERAKGDLIFNQTEQNLLLELEIALGYRSQSVLWTWHECNTTENGFSVAGYEGFGWDGETLMELKDN

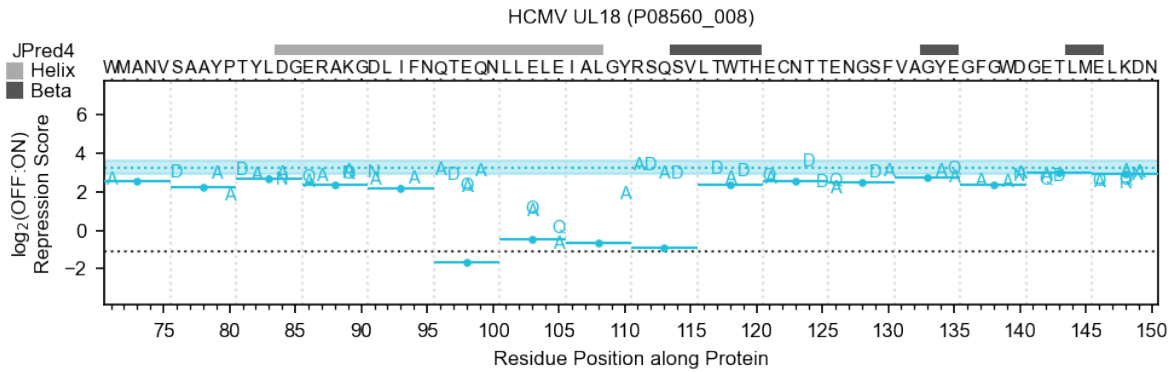

| Motif Name   | Motif Start | Motif End | Motif Sequence | Overlaps Essential? | Essential Start | Essential End | Essential Sequence |
|--------------|-------------|-----------|----------------|---------------------|-----------------|---------------|--------------------|
| SUMO_SIM_par | 100         | 105       | NLLELE         | Yes                 | 96              | 100           | QTEQN              |

HCMV UL1 (P16719)

Gene: UL1 ; Protein Family: UL1

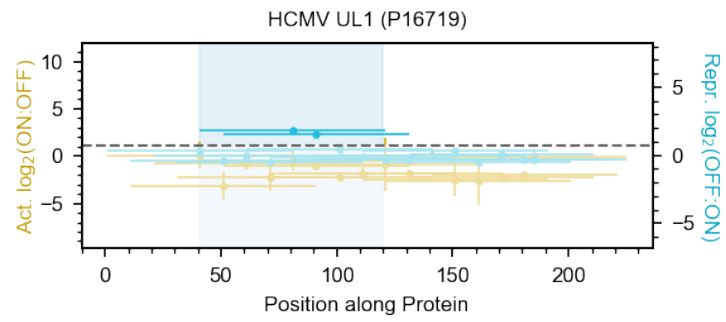

---

Extended repression domain from residues 41 to 130:

RLFLQSQHVEAPITVTQGDTVYLDASNNPCNYSSFWYHGNCELCGWNGYLRNVTHYYTNTSCSPQFMCINETKGLQLYNVTLNDSGAYTE

Max tile of repression domain from residues 41 to 120 (estimated 39.6% to 39.8% of cells repressed):

RLFLQSQHVEAPITVTQGDTVYLDASNNPCNYSSFWYHGNCELCGWNGYLRNVTHYYTNTSCSPQFMCINETKGLQLYNV

---

HCMV UL1 (Q6SWC8)

Gene: UL1 ; Protein Family: UL1

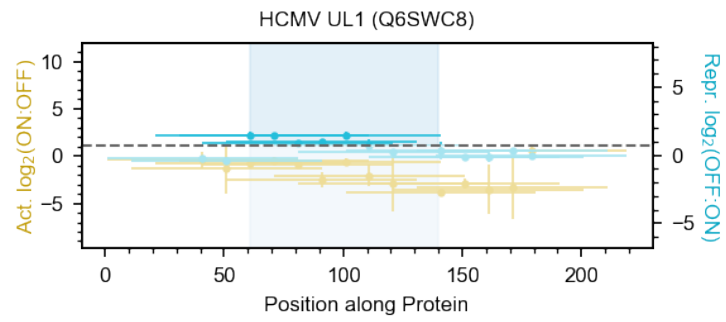

---

Extended repression domain from residues 21 to 150:

SSILVQAIPHKQKTSYQQLLQSEHVQIPITVAEGDTICFNVDNPNCFSSYWNHNNCELGWTPTFYSEYAGYSENKSCHPRFTCLHDTKGLKLNVTN  
DSGIYTRNVYYCDIPCNISDDHKHNVEDFD

Max tile of repression domain from residues 61 to 140 (estimated 24.5% to 36.3% of cells repressed):

NVDNPNCFSSYWNHNNCELGWTPTFYSEYAGYSENKSCHPRFTCLHDTKGLKLNVTNDSGIYTRNVYYCDIPCNISD

---



HCMV UL29 (C0H677)

Gene: UL29 ; Protein Family: UL29

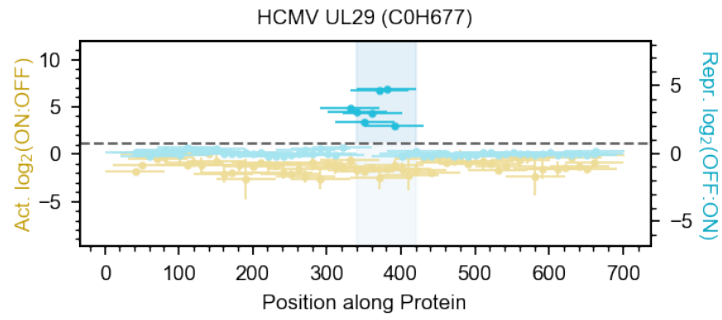

Extended repression domain from residues 291 to 430:

RILCGDTGTVYAAALVGQDKLVRLARDLRGFVRVGLALLIDDFRYESIGPVDRSSLYEANPELRLPFKKRRLVVG YFDSLSSLYL R GQPKFSSIWRGLRDA WTHKRPKPRERASGVHLQRYVRATAGRWLPLCW PPLHGIM

Max tile of repression domain from residues 341 to 420 (estimated 94.1% to 95.2% of cells repressed):

DRSSLYEANPELRLPFKKRRLVVG YFDSLSSLYL R GQPKFSSIWRGLRDA WTHKRPKPRERASGVHLQRYVRATAGRWL P

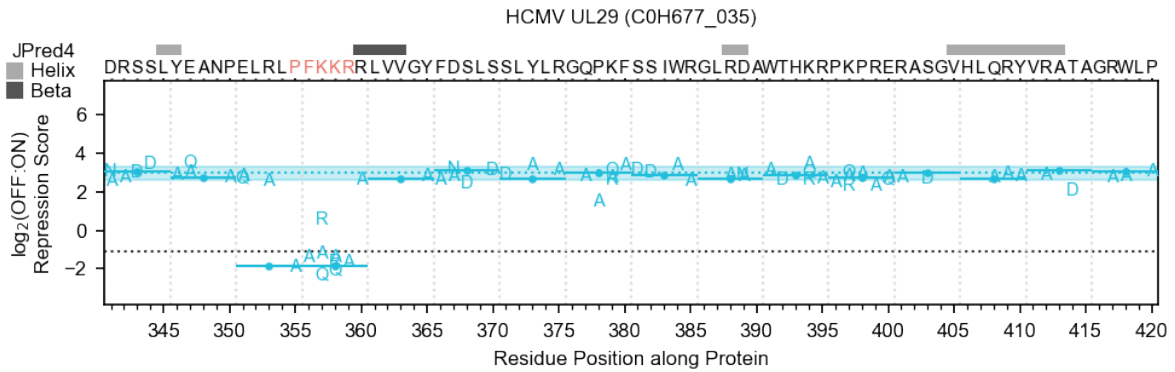

| Motif Name  | Motif Start | Motif End | Motif Sequence | Overlaps Essential? | Essential Start | Essential End | Essential Sequence |
|-------------|-------------|-----------|----------------|---------------------|-----------------|---------------|--------------------|
| NCoR_SMRT_1 | 355         | 359       | PFKKR          | Yes                 | 351             | 360           | ELRLPFKKRR         |
| flexi_NRBOX | 361         | 367       | LVVGYFD        | No                  | -               | -             |                    |
| flexi_NRBOX | 406         | 412       | HLQRYVR        | No                  | -               | -             |                    |

HHV6A UL37 (P30003)

Gene: U30 ; Protein Family: UL37

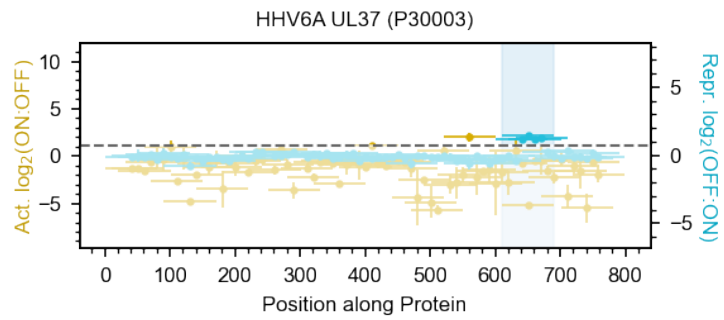

---

Extended repression domain from residues 601 to 710:

EKSLQTIQISETTLTGMLRNIITSVSSSKELLTNEALQKFIDTVQRISQHVNETYQSISMNLEKCKTSDILIESLKKIYIVDVLSSNAILNTSLASRCLEANLAVSN

Max tile of repression domain from residues 611 to 690 (estimated 25.0% to 33.6% of cells repressed):

ETTLTGMLRNIITSVSSSKELLTNEALQKFIDTVQRISQHVNETYQSISMNLEKCKTSDILIESLKKIYIVDVLSSNA

---

HHV6B UL38 (Q9WT45)

Gene: U19 ; Protein Family: UL38

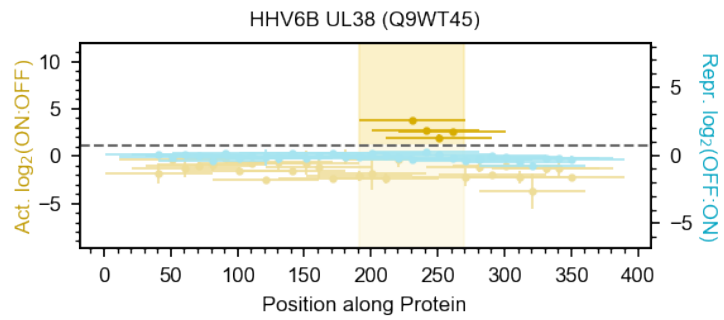

---

Extended activation domain from residues 191 to 300:

DARASMRPIQSDFSFGAKGPFPCWPTEELLQPSAKKDVGTVCMALSCQEDNSARHCTIYGLTKTPGIKIMLSRHTQTDRSEAMCDAATQTEDVVDNSSE  
TLFLGGNLVHQS

Max tile of activation domain from residues 191 to 270 (estimated 12.3% to 17.9% of cells activated):

DARASMRPIQSDFSFGAKGPFPCWPTEELLQPSAKKDVGTVCMALSCQEDNSARHCTIYGLTKTPGIKIMLSRHTQTDRSE

---

HSV1 UL46 (P10230)

Gene: UL46 ; Protein Family: UL46

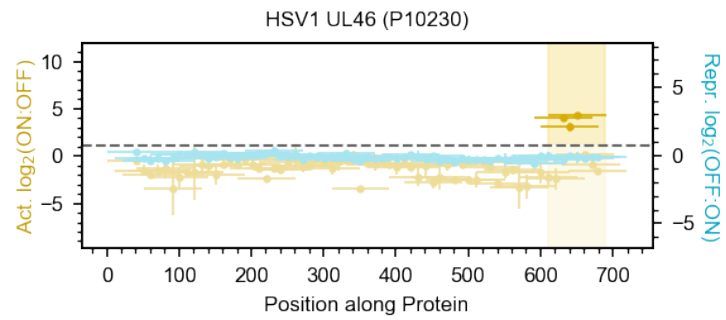

---

Extended activation domain from residues 591 to 690:

RKATHAASARERHAPYEDDESIYETVSEDGGRVYEEIPWMRVYENVCVNTANAAPASPYIEAENPLYDWGGSALFSPPGRTGPPPPPLSPSPVLARHRAN

Max tile of activation domain from residues 611 to 690 (estimated 20.7% to 23.2% of cells activated):

SIYETVSEDGGRVYEEIPWMRVYENVCVNTANAAPASPYIEAENPLYDWGGSALFSPPGRTGPPPPPLSPSPVLARHRAN

---

VZV UL46 (P09264)

Gene: ORF12 ; Protein Family: UL46

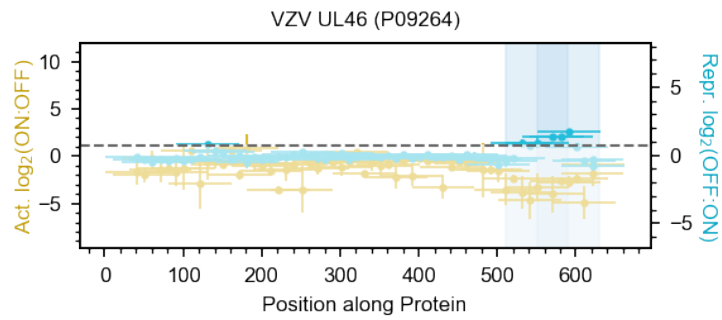

---

Extended repression domain from residues 491 to 590:

LSDDVNASSHVINTEAPLNSIAPDTNRQRTSRVLRPDTGLDVTVRKNHCLDIGHTDGSPVDPTYDPHYTRIKA EYEGPVRDESNTMFDQRSDLRHIETQ

Max tile of repression domain from residues 511 to 590 (estimated 12.0% to 25.5% of cells repressed):

IAPDTNRQRTSRVLRPDTGLDVTVRKNHCLDIGHTDGSPVDPTYDPHYTRIKA EYEGPVRDESNTMFDQRSDLRHIETQ

---

Extended repression domain from residues 531 to 630:

LDVTVRKNHCLDIGHTDGSPVDPTYDPHYTRIKA EYEGPVRDESNTMFDQRSDLRHIETQASLNDHVYENIPPKEVGFNSSDLDVDSLNGYTSGDMHT  
D

Max tile of repression domain from residues 551 to 630 (estimated 33.7% to 39.5% of cells repressed):

VDPTYDPHYTRIKA EYEGPVRDESNTMFDQRSDLRHIETQASLNDHVYENIPPKEVGFNSSDLDVDSLNGYTSGDMHTD

---

HHV7 UL49 (P52442)

Gene: U33 ; Protein Family: UL49

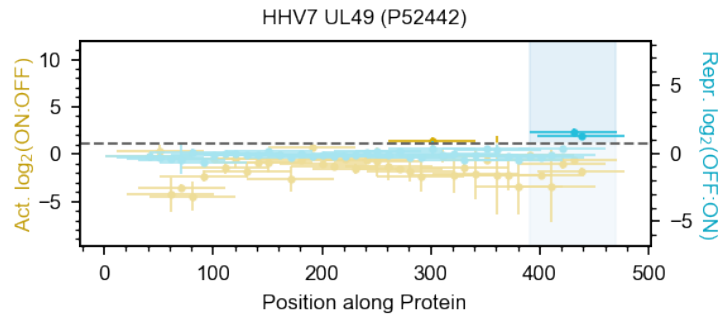

---

Extended repression domain from residues 391 to 477:

CTILNDSVKFDAIVACSCRTCYSMIHLQNLTKLLKLISHSTEFQCQDCQNIYRETCLDLEDCEICTGCKISQLAKCTQHGCNTW

Max tile of repression domain from residues 391 to 470 (estimated 25.3% to 38.2% of cells repressed):

CTILNDSVKFDAIVACSCRTCYSMIHLQNLTKLLKLISHSTEFQCQDCQNIYRETCLDLEDCEICTGCKISQLAKCT

---

HSV2 UL55 (P28281)

Gene: UL55 ; Protein Family: UL55

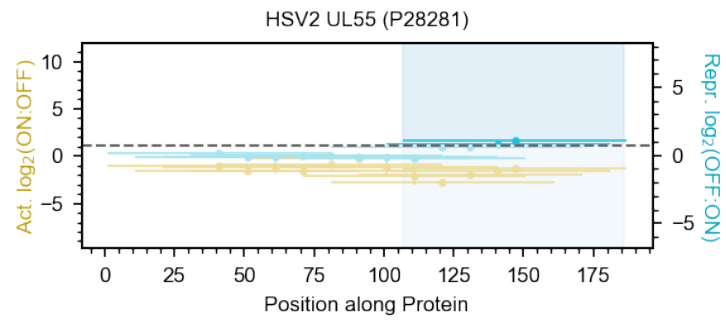

---

Extended repression domain from residues 101 to 186:

DKRGGRLRCTGPFSCGTIKDVSGASPAGEYTINGIVYHCHCRYPFKTCWLGASAALQHLSISSSGTAARAAEQRRHKIKIKIV

Max tile of repression domain from residues 107 to 186 (estimated 20.6% to 21.3% of cells repressed):

LRCTGPFSCGTIKDVSGASPAGEYTINGIVYHCHCRYPFKTCWLGASAALQHLSISSSGTAARAAEQRRHKIKIKIV

---

HCMV UL61 (P16818)

Gene: UL61 ; Protein Family: UL61

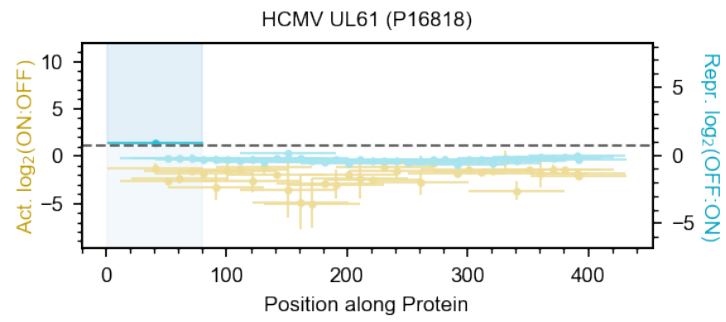

---

Extended repression domain from residues 1 to 80:

LWRGVLTTIEVSWRPTVDPERFRPHPTSPPHRPAHTPQPGGVRGADPGWAADGGRGVGDHAQQQQAATVRAEFFWGAAGE

Max tile of repression domain from residues 1 to 80 (estimated 16.5% to 16.9% of cells repressed):

LWRGVLTTIEVSWRPTVDPERFRPHPTSPPHRPAHTPQPGGVRGADPGWAADGGRGVGDHAQQQQAATVRAEFFWGAAGE

---



HCMV UL82 (P06726)

Gene: UL82 ; Protein Family: UL82

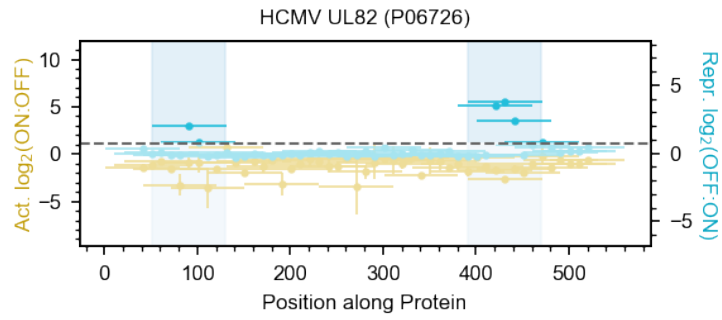

Extended repression domain from residues 51 to 140:

GRLRLDLRTNIEVSRPSVLCCFQENKSPHDTVLDLTLNIGRCVVGEQDRLLVLDLNNFGPRRLTPGSENNTVSVLAFALPLDRVPVSGL

Max tile of repression domain from residues 51 to 130 (estimated 43.2% to 45.4% of cells repressed):

GRLRLDLRTNIEVSRPSVLCCFQENKSPHDTVLDLTLNIGRCVVGEQDRLLVLDLNNFGPRRLTPGSENNTVSVLAFAL

Extended repression domain from residues 381 to 480:

KRPQVQLRAGLFPRSNVMRGAVSEFLPQSPGLPPTEEEEEEEEDEDDLSSTPTPTPLSEAMFAGFEEASGDESDTQAGLSPALILTGQRRRSGNNGA

Max tile of repression domain from residues 391 to 470 (estimated 84.9% to 86.4% of cells repressed):

LFPRSNVMRGAVSEFLPQSPGLPPTEEEEEEEEDEDDLSSTPTPTPLSEAMFAGFEEASGDESDTQAGLSPALILTG

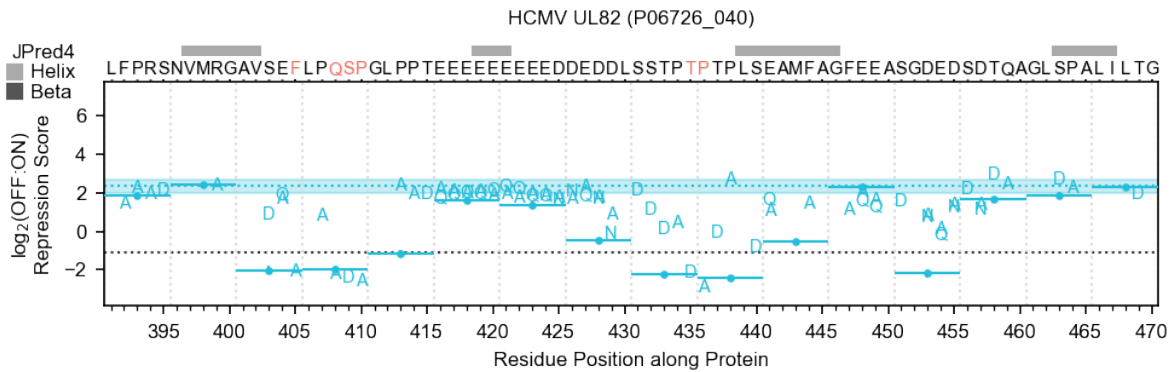

| Motif Name | Motif Start | Motif End | Motif Sequence | Overlaps Essential? | Essential Start | Essential End | Essential Sequence |
|------------|-------------|-----------|----------------|---------------------|-----------------|---------------|--------------------|
| MYND_1     | 410         | 414       | PGLPP          | Yes                 | 401             | 415           | AVSEFLPQSPGLPPT    |
|            | -           | -         |                | No                  | 431             | 440           | SSTPTPTPLS         |
|            | -           | -         |                | No                  | 451             | 455           | SGDED              |

EBV UL92 (P0CK57)

Gene: BDLF4 ; Protein Family: UL92

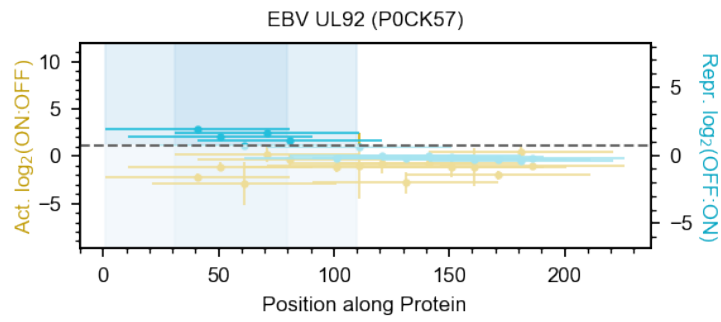

Extended repression domain from residues 1 to 90:

MSDQGRLSLPRGEGGTDEPNPRHLCSYSKLEFHLPLPESMASVFACWGCGEYHVCDGSSECTLIETHEGVVCALTGNYMGPHFQPALRPW

Max tile of repression domain from residues 1 to 80 (estimated 37.5% to 44.4% of cells repressed):

MSDQGRLSLPRGEGGTDEPNPRHLCSYSKLEFHLPLPESMASVFACWGCGEYHVCDGSSECTLIETHEGVVCALTGNYMG

Extended repression domain from residues 31 to 120:

EFHLPLPESMASVFACWGCGEYHVCDGSSECTLIETHEGVVCALTGNYMGPHFQPALRPWTEIRQDTQDQRDKWEPEQVQGLVKTVVNHL

Max tile of repression domain from residues 31 to 110 (estimated 29.5% to 38.2% of cells repressed):

EFHLPLPESMASVFACWGCGEYHVCDGSSECTLIETHEGVVCALTGNYMGPHFQPALRPWTEIRQDTQDQRDKWEPEQVQ

KSHV UL92 (Q2HRA1)

Gene: ORF31 ; Protein Family: UL92

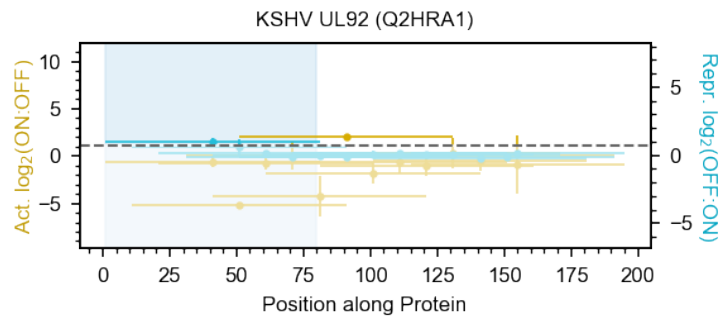

---

Extended repression domain from residues 1 to 80:

MKSVASPLCQFHGVFCLYQCRQCLAYHVCDGGAECVLLHTPESVICELTGNMMLGNIQEGQFLGPVYRRLDNQVDRDAY

Max tile of repression domain from residues 1 to 80 (estimated 15.6% to 24.9% of cells repressed):

MKSVASPLCQFHGVFCLYQCRQCLAYHVCDGGAECVLLHTPESVICELTGNMMLGNIQEGQFLGPVYRRLDNQVDRDAY

---

HCMV UNG (P16769)

Gene: UL114 ; Protein Family: UNG

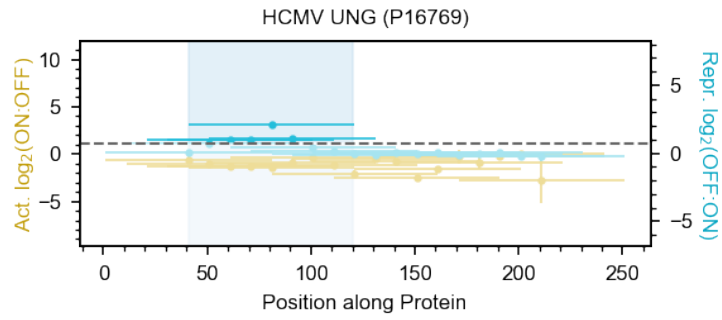

Extended repression domain from residues 11 to 130:

IADNKGSLLPDEQARVFLSADWIRFLSLPDHDTVLLRDTVAAVEGARQLEMVYPAPEHVHRWSYLCPPPEQVRVIVGQDPYCDGSASGLAFGTLAGR  
PPPSLNNVFRELARTVDGFQ

Max tile of repression domain from residues 41 to 120 (estimated 42.7% to 52.9% of cells repressed):

PDHDTVLLRDTVAAVEGARQLEMVYPAPEHVHRWSYLCPPPEQVRVIVGQDPYCDGSASGLAFGTLAGRPPPSLNNVFR

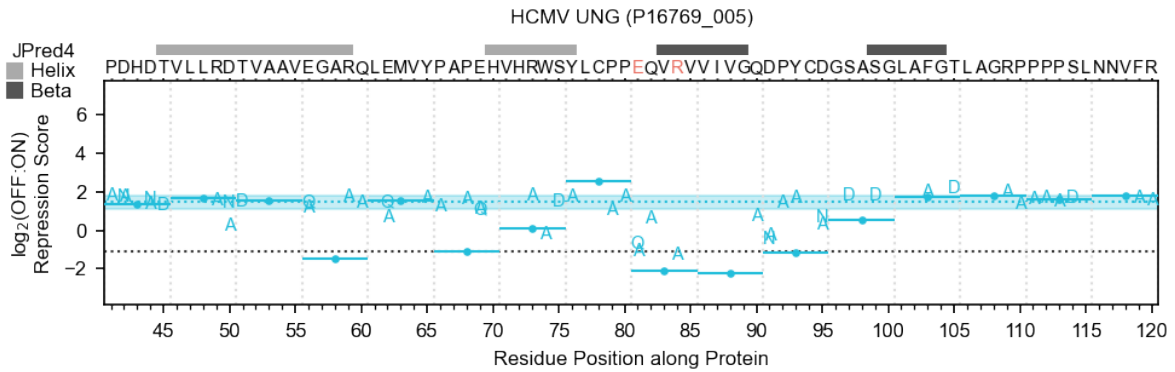

| Motif Name    | Motif Start | Motif End | Motif Sequence | Overlaps Essential? | Essential Start | Essential End | Essential Sequence |
|---------------|-------------|-----------|----------------|---------------------|-----------------|---------------|--------------------|
| SUMO_SIM_par  | 44          | 51        | DTVLLRDT       | No                  | -               | -             |                    |
|               | -           | -         |                | No                  | 56              | 60            | EGARQ              |
|               | -           | -         |                | No                  | 66              | 70            | PAPEH              |
| flexi_NRBOX   | 82          | 88        | QVRVVIV        | Yes                 | 81              | 95            | EQVRVIVGQDPYCD     |
| CtBP_expanded | 112         | 116       | PPSLN          | No                  | -               | -             |                    |
| flexi_NRBOX   | 114         | 120       | SLNNVFR        | No                  | -               | -             |                    |

VZV UNG (Q9J3N2)

Gene: ORF59 ; Protein Family: UNG

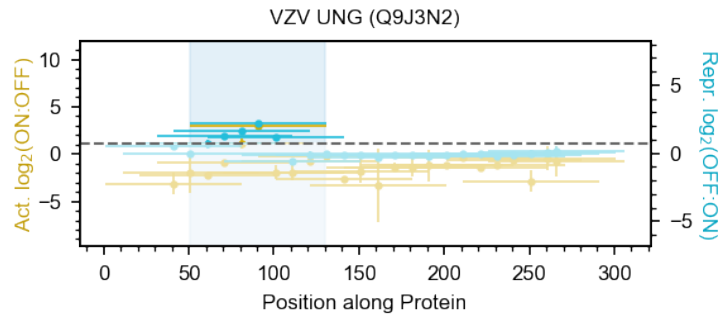

Extended repression domain from residues 21 to 140:

SDSKDIYVLAHPVTKKTRKRPRGPPLGVKLDPPPTFKLNNMSHHYDTETFTPVSSQLDSVEVFSKFNISPEWYDLLSDELKEPYAKGIFLEYNRLNLSGEEILPSTGDIFAWTRFCGPQSI

Max tile of repression domain from residues 51 to 130 (estimated 46.4% to 51.2% of cells repressed):

DPPTFKLNNMSHHYDTETFTPVSSQLDSVEVFSKFNISPEWYDLLSDELKEPYAKGIFLEYNRLNLSGEEILPSTGDIFA

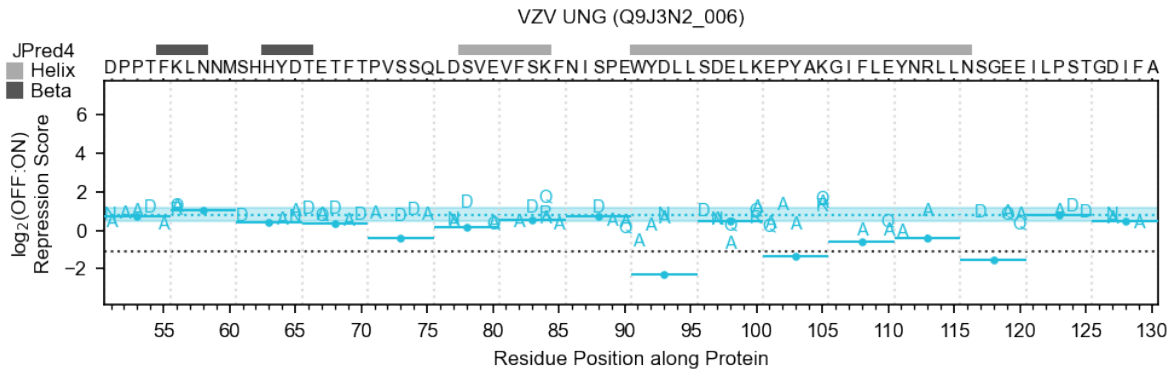

| Motif Name  | Motif Start | Motif End | Motif Sequence | Overlaps Essential? | Essential Start | Essential End | Essential Sequence |
|-------------|-------------|-----------|----------------|---------------------|-----------------|---------------|--------------------|
| flexi_NRBOX | 90          | 96        | EWYDLLS        | Yes                 | 91              | 95            | WYDLL              |
| SUMO_rev    | 93          | 102       | DLLSDELKEP     | Yes                 | 91              | 95            | WYDLL              |
| SUMO_rev    | 93          | 102       | DLLSDELKEP     | Yes                 | 101             | 105           | EPYAK              |
|             | -           | -         |                | No                  | 116             | 120           | NSGEE              |

HCMV US10 (P09728)

Gene: US10 ; Protein Family: US10

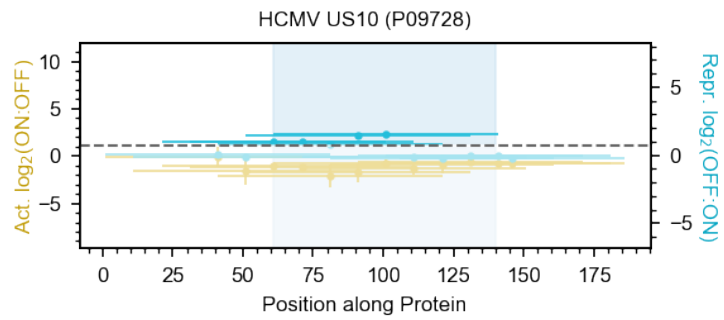

---

Extended repression domain from residues 21 to 140:

VVAAATEETREPTYFTCGCVIQNHVLKGAVKLYGQFPSPKTLRASAWLHDGENHERHRQPILVEGTATATEALYILLPTELSSPEGNRPRNYSATLTLASR  
DCYERFVCPVYDSGTPMGV

Max tile of repression domain from residues 61 to 140 (estimated 30.7% to 32.3% of cells repressed):

TLRASAWLHDGENHERHRQPILVEGTATATEALYILLPTELSSPEGNRPRNYSATLTLASRDCYERFVCPVYDSGTPMGV

---

HSV1 US3 (P04413)

Gene: US3 ; Protein Family: US3

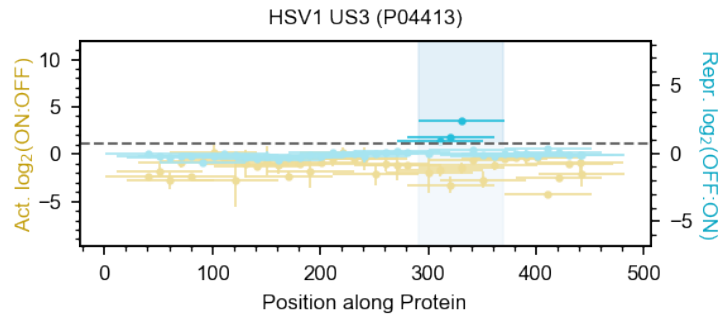

Extended repression domain from residues 271 to 370:

SRRLNPLGRPQIAAVSRQLLSAVDYIHRQGIHRDIKTENIFINTPEDICLGDFGAACFVQGSRSSPPFYGIAGTIDTNAPEVLAGDPYTTTVDIWSAGL

Max tile of repression domain from residues 291 to 370 (estimated 53.1% to 55.4% of cells repressed):

SAVDYIHRQGIHRDIKTENIFINTPEDICLGDFGAACFVQGSRSSPPFYGIAGTIDTNAPEVLAGDPYTTTVDIWSAGL

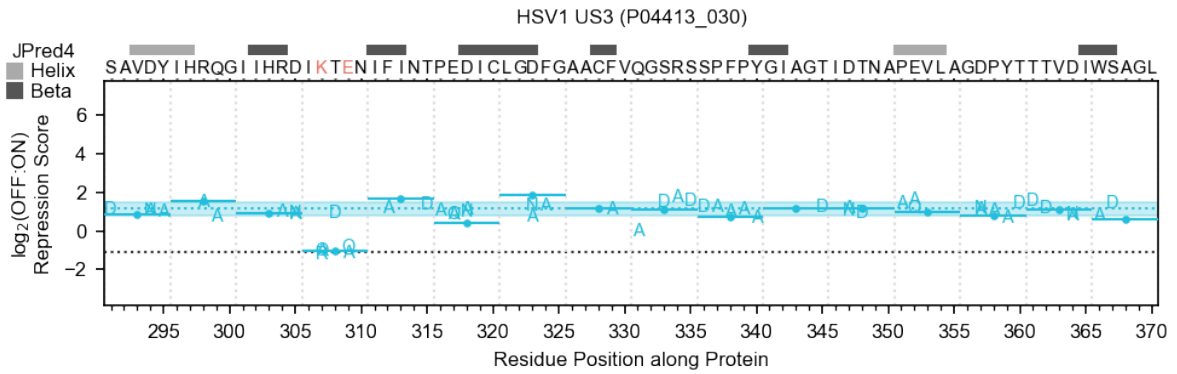

| Motif Name   | Motif Start | Motif End | Motif Sequence | Overlaps Essential? | Essential Start | Essential End | Essential Sequence |
|--------------|-------------|-----------|----------------|---------------------|-----------------|---------------|--------------------|
| SUMO_for     | 306         | 309       | IKTE           | No                  | -               | -             |                    |
| SUMO_SIM_par | 360         | 367       | TTTVDIWS       | No                  | -               | -             |                    |

HSV2 US3 (P13287)

Gene: US3 ; Protein Family: US3

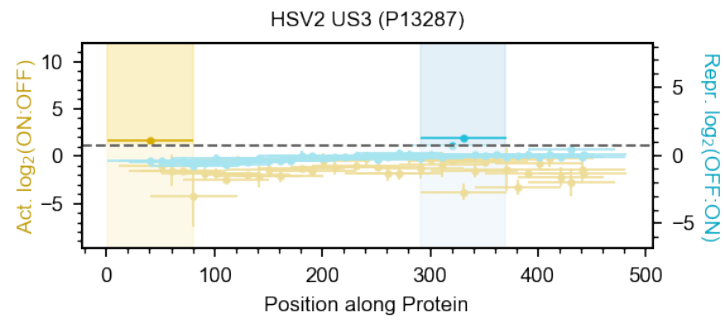

Extended activation domain from residues 1 to 80:

MACRKFCGVYRRPDKRQEASVPPETNTAPAFPASTFYTPAEDAYLAPGPPETIHPSRPPSPGEAARLCQLQEILAQMHSD

Max tile of activation domain from residues 1 to 80 (estimated 2.7% to 4.1% of cells activated):

MACRKFCGVYRRPDKRQEASVPPETNTAPAFPASTFYTPAEDAYLAPGPPETIHPSRPPSPGEAARLCQLQEILAQMHSD

Extended repression domain from residues 281 to 370:

QITAVSRQLLSAIDYVHCKGIIHRDIKTENIFINTPENICLGDFGAACFVRGCRSSPFHYGIAGTIDTNAPEVLAGDPYTQVIDIWSAGL

Max tile of repression domain from residues 291 to 370 (estimated 25.2% to 26.3% of cells repressed):

SAIDYVHCKGIIHRDIKTENIFINTPENICLGDFGAACFVRGCRSSPFHYGIAGTIDTNAPEVLAGDPYTQVIDIWSAGL



SuHV1 US3 (P24381)

Gene: - ; Protein Family: US3

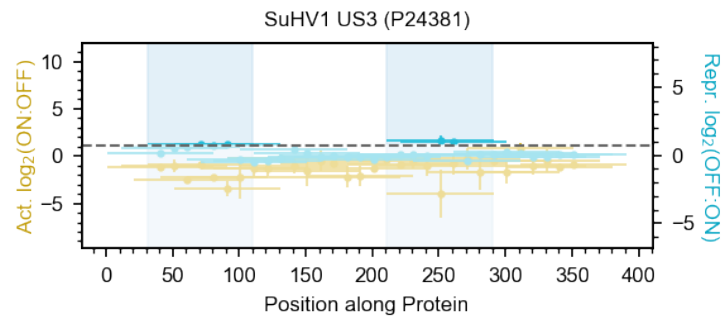

Extended repression domain from residues 31 to 130:

CSLYLAGLSRGLSRVHAQRSHAATMADAGIPDEILYSDISDDEIIIDGDDGDDSSGDEDDDDGGLTRQAASRIATDLGFEVLQPLQSGSEGRVAVARRPG

Max tile of repression domain from residues 31 to 110 (estimated 15.9% to 16.7% of cells repressed):

CSLYLAGLSRGLSRVHAQRSHAATMADAGIPDEILYSDISDDEIIIDGDDGDDSSGDEDDDDGGLTRQAASRIATDLGFE

Extended repression domain from residues 211 to 300:

LAYLHGMHRIMHRDVKAENIFLEDVDTVCLGDLGAARCNVAAPNFYGLAGTIETNAPEVLARDRYDTKVDVWGAGVVLFFETLAPKTIAGG

Max tile of repression domain from residues 211 to 290 (estimated 15.4% to 29.6% of cells repressed):

LAYLHGMHRIMHRDVKAENIFLEDVDTVCLGDLGAARCNVAAPNFYGLAGTIETNAPEVLARDRYDTKVDVWGAGVVLFFET

KSHV VIRF1 (F5HF68)

Gene: K9 ; Protein Family: VIRF

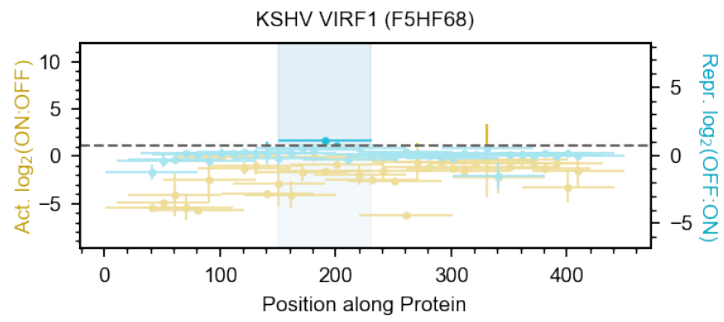

---

Extended repression domain from residues 151 to 240:

VDASFKGTRGRRRMLAALRRTRGLQEIGKGISQDGHHFLVFRVRKPEEEQCECGVVAGAVHDFNNMARLLQEGFFSPGQCLPGEIVTPV

Max tile of repression domain from residues 151 to 230 (estimated 16.8% to 24.0% of cells repressed):

VDASFKGTRGRRRMLAALRRTRGLQEIGKGISQDGHHFLVFRVRKPEEEQCECGVVAGAVHDFNNMARLLQEGFFSPGQ

---

KSHV VIRF2 (Q2HR71)

Gene: K11 ; Protein Family: VIRF

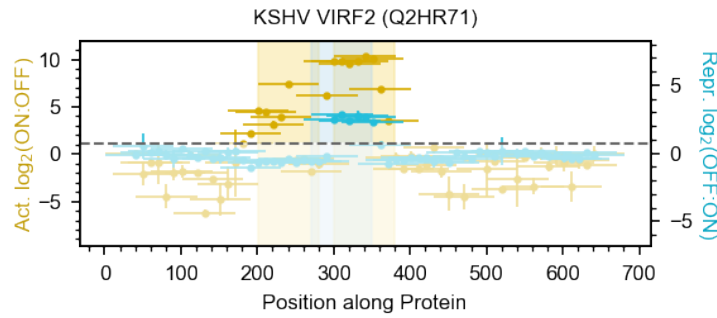

Extended activation domain from residues 141 to 280:

IYPHDDKHREKALRRSLRKKQAQREARKQAAAVATPTSSAAEVSSRSQSEDTESSDSENELWVGAQGFVGRDMHSLFFEEPEPSGFGSSGQSSLLA  
PDSRPSTSQVQGPLHVHTPTDCLPTGGLPSPVIFPHETQG

Max tile of activation domain from residues 201 to 280 (estimated 81.1% to 81.6% of cells activated):

ELWVGAQGFVGRDMHSLFFEEPEPSGFGSSGQSSLLAPDSRPSTSQVQGPLHVHTPTDCLPTGGLPSPVIFPHETQG

Extended repression domain from residues 261 to 390:

LCLPTGGLPSPVIFPHETQGLLAPPAGQSQTFFSPEGPVPSHVSGLDCLPMVDHIEGCLLDLLSDVGQELPDLGDLGELLCETASPQGMQSEGGEEG  
STESVSVLPATHPLESSAPGASVMGSGQELP

Max tile of repression domain from residues 271 to 350 (estimated 62.7% to 70.7% of cells repressed):

PVIFPHETQGLLAPPAGQSQTFFSPEGPVPSHVSGLDCLPMVDHIEGCLLDLLSDVGQELPDLGDLGELLCETASPQGP

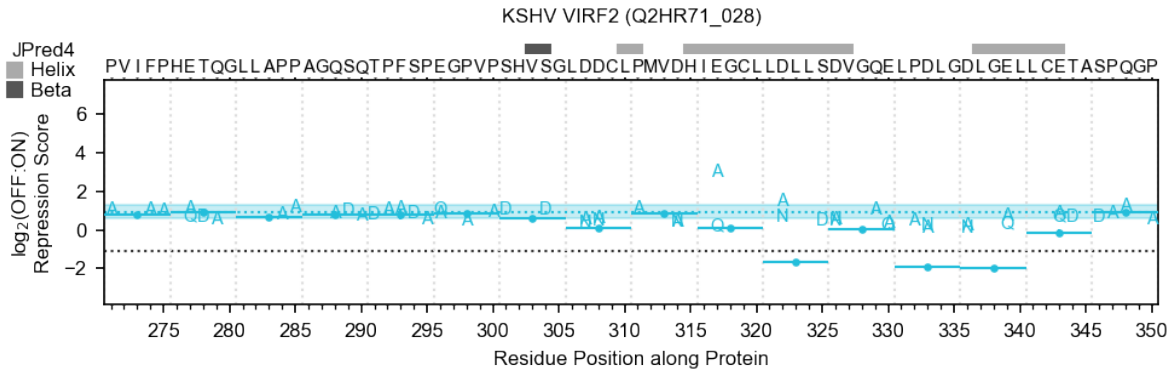

| Motif Name   | Motif Start | Motif End | Motif Sequence | Overlaps Essential? | Essential Start | Essential End | Essential Sequence |
|--------------|-------------|-----------|----------------|---------------------|-----------------|---------------|--------------------|
| SUMO_SIM_par | 319         | 326       | CLLDLLSD       | Yes                 | 321             | 325           | LDLLS              |
| LIG_NRBOX    | 319         | 325       | CLLDLLS        | Yes                 | 321             | 325           | LDLLS              |
| LIG_NRBOX    | 336         | 342       | DLGELLC        | Yes                 | 331             | 340           | LPDLGDLGEL         |

Extended activation domain from residues 251 to 410:

GPLHVHTPTDCLPTGGLPSPVIFPHETQGLLAPPAGQSQTFFSPEGPVPSHVSGLDCLPMVDHIEGCLLDLLSDVGQELPDLGDLGELLCETASPQGP  
MQSEGGEEGSTESVSVLPATHPLESSAPGASVMGSGQELPDLGDLSELLCETASPQGMQ

Max tile of activation domain from residues 301 to 380 (estimated 96.7% to 96.7% of cells activated):

SHVSGLDCLPMVDHIEGCLLDLLSDVGQELPDLGDLGELLCETASPQGMQSEGGEEGSTESVSVLPATHPLESSAPGA

Herpesvirus Tiling and Perturbation Screen Data from Ludwig, C.H. et al. 2023

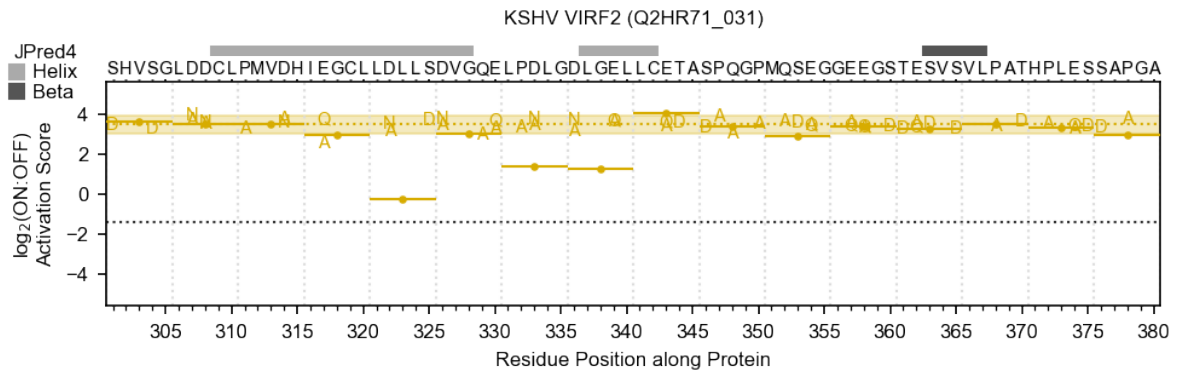

| Motif Name    | Motif Start | Motif End | Motif Sequence | Overlaps Essential? | Essential Start | Essential End | Essential Sequence |
|---------------|-------------|-----------|----------------|---------------------|-----------------|---------------|--------------------|
| LIG_NRBOX     | 319         | 325       | CLLDLLS        | No                  | -               | -             |                    |
| SUMO_SIM_par  | 319         | 326       | CLLDLLSD       | No                  | -               | -             |                    |
| LIG_NRBOX     | 336         | 342       | DLGELLC        | No                  | -               | -             |                    |
| SUMO_SIM_anti | 360         | 368       | STESVSVLP      | No                  | -               | -             |                    |

KSHV VIRF3 (F5HIC6)

Gene: K10.5 ; Protein Family: VIRF

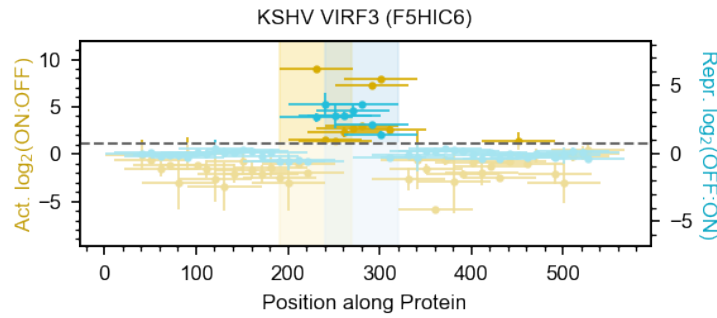

Extended activation domain from residues 191 to 350:

TRHSASGVQPVDANADSPGSGDEGPSTRHSDSQPPPADETTVHTDNVEDDLTLLDKESACALMYHVGQEMDMLMRAMCDEDLFDLLGIPEDVIATS  
QPGGTDASGVVTEGSAASAVGAGVEDVYLAGALEAQNVAAGEYVLEISDEEVDDGAGLPPAS

Max tile of activation domain from residues 191 to 270 (estimated 93.0% to 94.1% of cells activated):

TRHSASGVQPVDANADSPGSGDEGPSTRHSDSQPPPADETTVHTDNVEDDLTLLDKESACALMYHVGQEMDMLMRAMC

Extended repression domain from residues 191 to 340:

TRHSASGVQPVDANADSPGSGDEGPSTRHSDSQPPPADETTVHTDNVEDDLTLLDKESACALMYHVGQEMDMLMRAMCDEDLFDLLGIPEDVIATS  
QPGGTDASGVVTEGSAASAVGAGVEDVYLAGALEAQNVAAGEYVLEISDEEV

Max tile of repression domain from residues 241 to 320 (estimated 81.6% to 84.0% of cells repressed):

DLTLLDKESACALMYHVGQEMDMLMRAMCDEDLFDLLGIPEDVIATSQPGGTDASGVVTEGSAASAVGAGVEDVYLAG

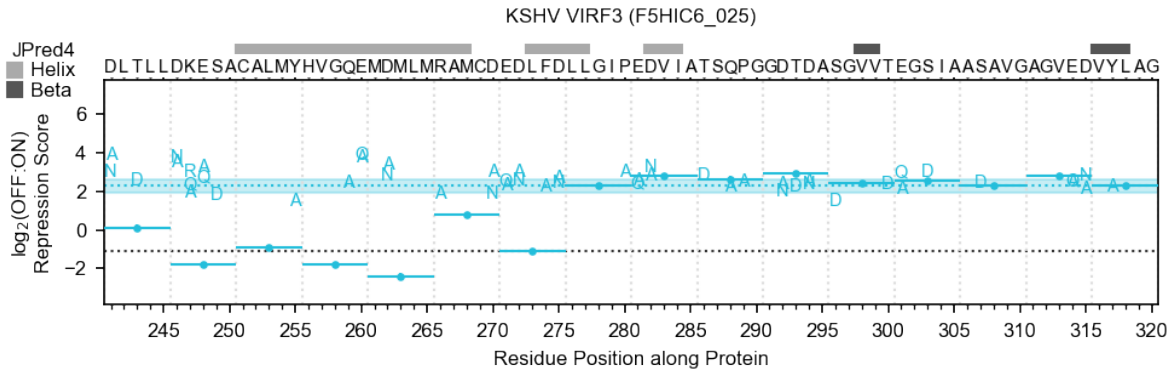

| Motif Name    | Motif Start | Motif End | Motif Sequence | Overlaps Essential? | Essential Start | Essential End | Essential Sequence |
|---------------|-------------|-----------|----------------|---------------------|-----------------|---------------|--------------------|
| SUMO_SIM_anti | 241         | 246       | DLTLLD         | Yes                 | 246             | 250           | DKESA              |
|               | -           | -         |                | No                  | 256             | 265           | HVGQEMDMLM         |
| LIG_NRBOX     | 272         | 278       | DLFDLLG        | Yes                 | 271             | 275           | EDLFD              |

Extended activation domain from residues 191 to 340:

TRHSASGVQPVDANADSPGSGDEGPSTRHSDSQPPPADETTVHTDNVEDDLTLLDKESACALMYHVGQEMDMLMRAMCDEDLFDLLGIPEDVIATS  
QPGGTDASGVVTEGSAASAVGAGVEDVYLAGALEAQNVAAGEYVLEISDEEV

Max tile of activation domain from residues 261 to 340 (estimated 83.9% to 88.5% of cells activated):

MDMLMRAMCDEDLFDLLGIPEDVIATSQPGGTDASGVVTEGSAASAVGAGVEDVYLAGALEAQNVAAGEYVLEISDEEV

Herpesvirus Tiling and Perturbation Screen Data from Ludwig, C.H. et al. 2023

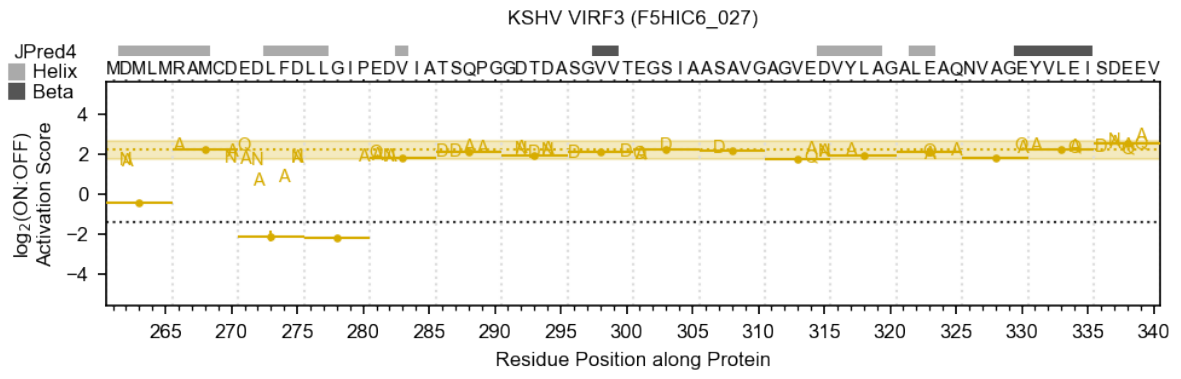

| Motif Name   | Motif Start | Motif End | Motif Sequence | Overlaps Essential? | Essential Start | Essential End | Essential Sequence |
|--------------|-------------|-----------|----------------|---------------------|-----------------|---------------|--------------------|
| LIG_NRBOX    | 272         | 278       | DLFDLLG        | Yes                 | 271             | 280           | EDLFDLLGIP         |
| SUMO_SIM_par | 330         | 339       | EYVLEISDEE     | No                  | -               | -             |                    |

KSHV VIRF4 (Q2HR73)

Gene: K10 ; Protein Family: VIRF

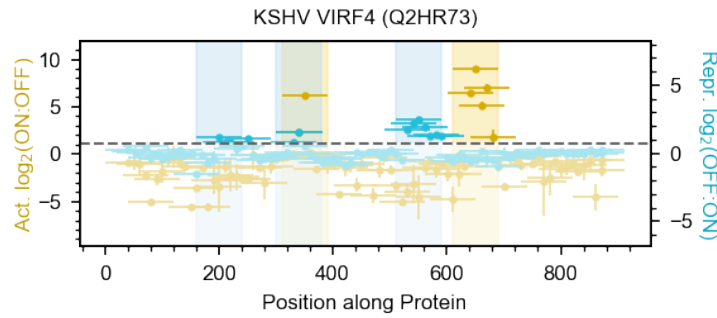

Extended repression domain from residues 161 to 260:

EEAGAAAPAPPKAPSGLRGRPRKSNRYYNVGDITTEQKAACSVWIPVNEGASTSGMGSSGTRQVTQASSFTWRVPGDPPAPSTLTGPSDPHSSGAGL PGT

Max tile of repression domain from residues 161 to 240 (estimated 21.4% to 25.0% of cells repressed):

EEAGAAAPAPPKAPSGLRGRPRKSNRYYNVGDITTEQKAACSVWIPVNEGASTSGMGSSGTRQVTQASSFTWRVPGDPPA

Extended repression domain from residues 291 to 380:

LAPPMRDGSRPSTSPWIPACFPWGDLPVTGWWPQGASGLPEKVHPPTTGQFDPLSPRWYTYTGIPSSQLNPAAPSWIPPHAQAGTFVGEF

Max tile of repression domain from residues 301 to 380 (estimated 28.5% to 34.7% of cells repressed):

LPSTSPWIPACFPWGDLPVTGWWPQGASGLPEKVHPPTTGQFDPLSPRWYTYTGIPSSQLNPAAPSWIPPHAQAGTFVGEF

Extended activation domain from residues 301 to 390:

LPSTSPWIPACFPWGDLPVTGWWPQGASGLPEKVHPPTTGQFDPLSPRWYTYTGIPSSQLNPAAPSWIPPHAQAGTFVGEFSQGAPLAPQG

Max tile of activation domain from residues 311 to 390 (estimated 58.1% to 62.1% of cells activated):

CFPWGDLPVTGWWPQGASGLPEKVHPPTTGQFDPLSPRWYTYTGIPSSQLNPAAPSWIPPHAQAGTFVGEFSQGAPLAPQG

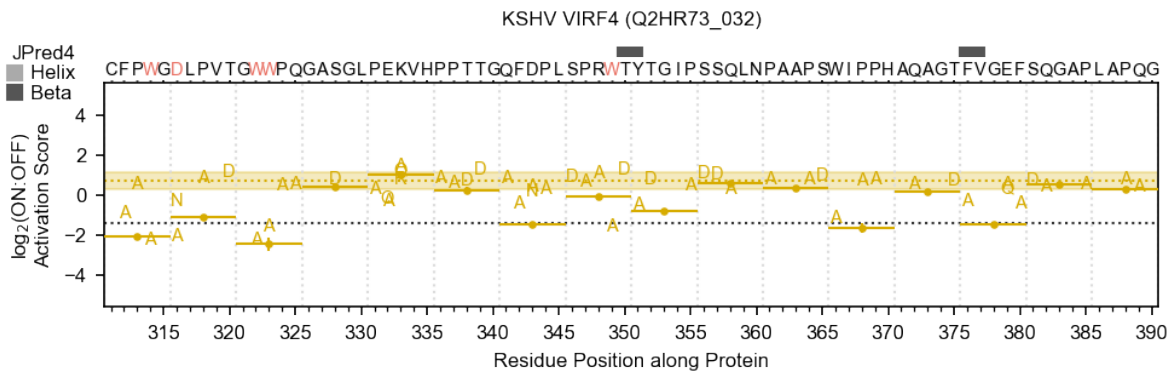

| Motif Name | Motif Start | Motif End | Motif Sequence | Overlaps Essential? | Essential Start | Essential End | Essential Sequence |
|------------|-------------|-----------|----------------|---------------------|-----------------|---------------|--------------------|
|            | -           | -         |                | No                  | 311             | 315           | CFPWG              |
|            | -           | -         |                | No                  | 321             | 325           | GWWPQ              |
|            | -           | -         |                | No                  | 341             | 345           | QFDPL              |
|            | -           | -         |                | No                  | 366             | 370           | WIPPH              |
|            | -           | -         |                | No                  | 376             | 380           | FVGEF              |

Extended repression domain from residues 491 to 630:

WSSGAPNQGLSHTQGGASATPSAGAPPTPEVAERQEPSSSGIPYVCQGDNMATGYRRVTTSSGALEVEIIDLTGSDTPSTTVASTPLPVSGPRVFQ PTVLYSAPEPAVNPEVSHLPTELERRECVCPSGGERPRVPLV

Max tile of repression domain from residues 511 to 590 (estimated 54.2% to 58.2% of cells repressed):

TPSAGAPPTPEVAERQEPSSSGIPYVCQGDNMATGYRRVTTSSGALEVEIIDLTGSDTPSTTVASTPLPVSGPRVFQPT

Herpesvirus Tiling and Perturbation Screen Data from Ludwig, C.H. et al. 2023

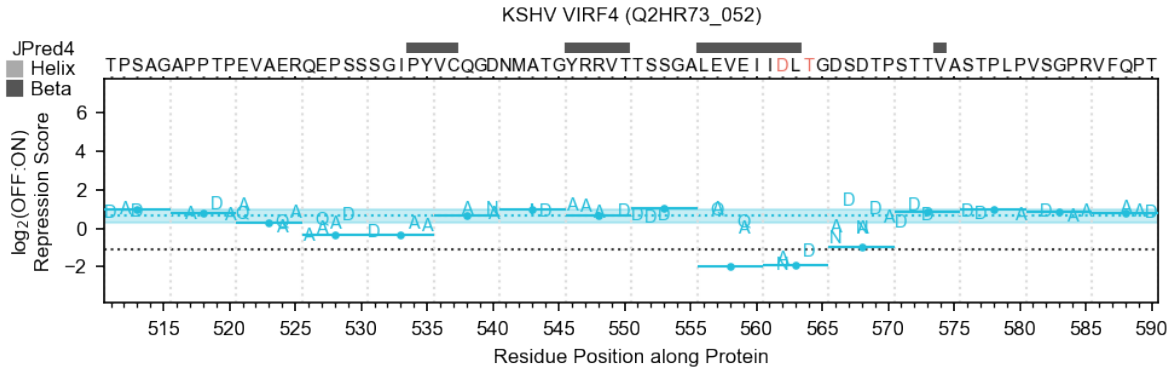

| Motif Name    | Motif Start | Motif End | Motif Sequence | Overlaps Essential? | Essential Start | Essential End | Essential Sequence |
|---------------|-------------|-----------|----------------|---------------------|-----------------|---------------|--------------------|
| SUMO_SIM_anti | 557         | 562       | EVEIID         | Yes                 | 556             | 565           | LEVEIIDLTG         |
| SUMO_SIM_par  | 559         | 564       | EIIDLT         | Yes                 | 556             | 565           | LEVEIIDLTG         |

Extended activation domain from residues 601 to 720:

NPEVSHLPTELERRECVCPSGERPRVPLVSTYAGDRYAVGGYGPEQSLVPPPLGLPLTLSNLQGEDICTWEEGLGNILSELQEPPSSSTRQATDRRRP  
RSRSPHGR RTPVSHSGPEKPP

Max tile of activation domain from residues 611 to 690 (estimated 92.9% to 93.9% of cells activated):

LERRECVCPSGERPRVPLVSTYAGDRYAVGGYGPEQSLVPPPLGLPLTLSNLQGEDICTWEEGLGNILSELQEPPSSST

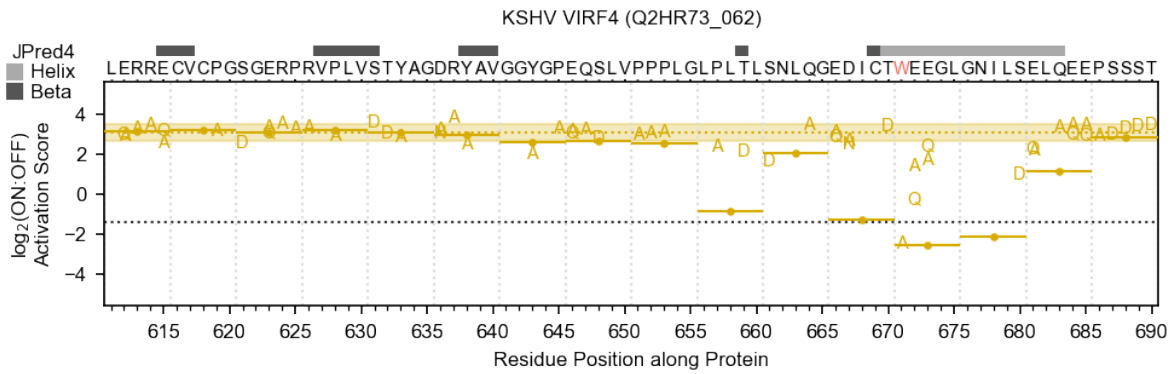

| Motif Name   | Motif Start | Motif End | Motif Sequence | Overlaps Essential? | Essential Start | Essential End | Essential Sequence |
|--------------|-------------|-----------|----------------|---------------------|-----------------|---------------|--------------------|
| SUMO_SIM_par | 656         | 661       | LPLTLS         | No                  | -               | -             |                    |
| flexi_NRBOX  | 674         | 680       | GLGNILS        | Yes                 | 671             | 680           | WEEGLGNILS         |



HSV1 VP16 (P06492)

Gene: UL48 ; Protein Family: VP16

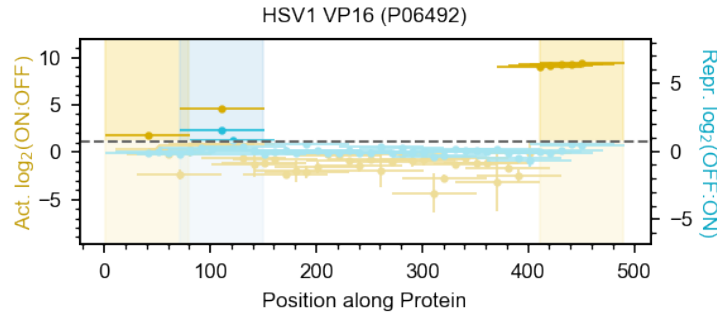

Extended activation domain from residues 1 to 80:

MDLLVDELFDADMNADGASPPPPRPAGGPKNTPAAPPLYATGRLSQAQLMPSPMPVPPAALFNRLDDLGFSAGPALCTM

Max tile of activation domain from residues 1 to 80 (estimated 3.3% to 4.2% of cells activated):

MDLLVDELFDADMNADGASPPPPRPAGGPKNTPAAPPLYATGRLSQAQLMPSPMPVPPAALFNRLDDLGFSAGPALCTM

Extended repression domain from residues 71 to 160:

FSAGPALCTMLDWTNEDLFSALPTNADLYRECKFLSTLPSDVVEWGDYVPERTQIDIRAHGDVAFPTLPATRDGLGLYEALSRFFHAE

Max tile of repression domain from residues 71 to 150 (estimated 29.3% to 33.2% of cells repressed):

FSAGPALCTMLDWTNEDLFSALPTNADLYRECKFLSTLPSDVVEWGDYVPERTQIDIRAHGDVAFPTLPATRDGLGLY

Extended activation domain from residues 371 to 490:

NNYGSTIEGLLDLPDDDAPEEAGLAAPRLSFLPAGHTRRLSTAPPTDVSLGDELHLDGEDVAMAHADALDDFDLMLGDGDSPPGPGFTPHDSAPYGALDMADFEFEQMFTDALGIDEYGG

Max tile of activation domain from residues 411 to 490 (estimated 94.4% to 95.0% of cells activated):

STAPPTDVSLGDELHLDGEDVAMAHADALDDFDLMLGDGDSPPGPGFTPHDSAPYGALDMADFEFEQMFTDALGIDEYGG

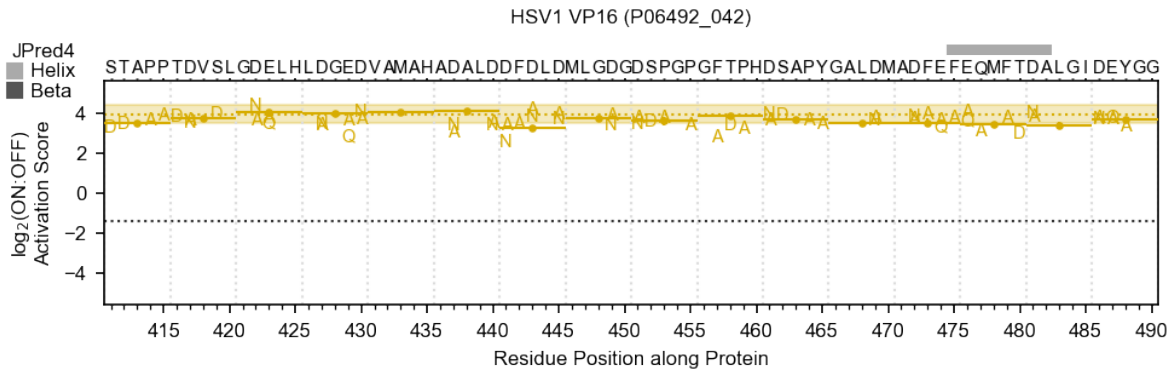

| Motif Name | Motif Start | Motif End | Motif Sequence | Overlaps Essential? | Essential Start | Essential End | Essential Sequence |
|------------|-------------|-----------|----------------|---------------------|-----------------|---------------|--------------------|
|            | -           | -         |                | No                  | -               | -             |                    |

HSV2 VP16 (P68336)

Gene: UL48 ; Protein Family: VP16

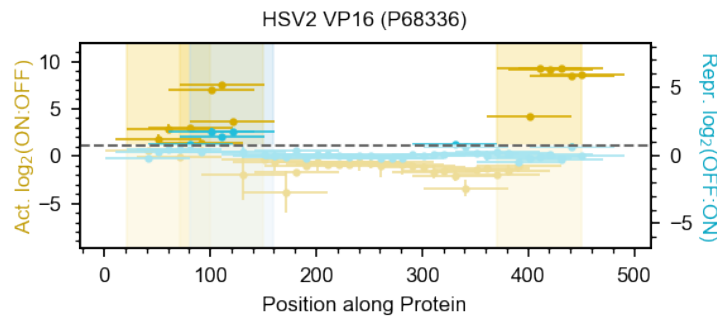

Extended activation domain from residues 11 to 100:

DADGVSPPPRPAGGPKNTPAAPPLYATGRLSQAQLMPSPMPVPPAALFNRLDDLGFSAGPALCTMLDWTNEDLFSGFPTNADMYREC

Max tile of activation domain from residues 21 to 100 (estimated 5.6% to 11.3% of cells activated):

RPAGGPKNTPAAPPLYATGRLSQAQLMPSPMPVPPAALFNRLDDLGFSAGPALCTMLDWTNEDLFSGFPTNADMYREC

Extended activation domain from residues 41 to 160:

LSQAQLMPSPMPVPPAALFNRLDDLGFSAGPALCTMLDWTNEDLFSGFPTNADMYRECKFLSTLPSDVIDWGDHVPERSPIDIRAHGDVAFPTLPA  
TRDELPSYEEAMAQFFRGELR

Max tile of activation domain from residues 71 to 150 (estimated 83.3% to 83.4% of cells activated):

AGPALCTMLDWTNEDLFSGFPTNADMYRECKFLSTLPSDVIDWGDHVPERSPIDIRAHGDVAFPTLPATRDELPSYEEA

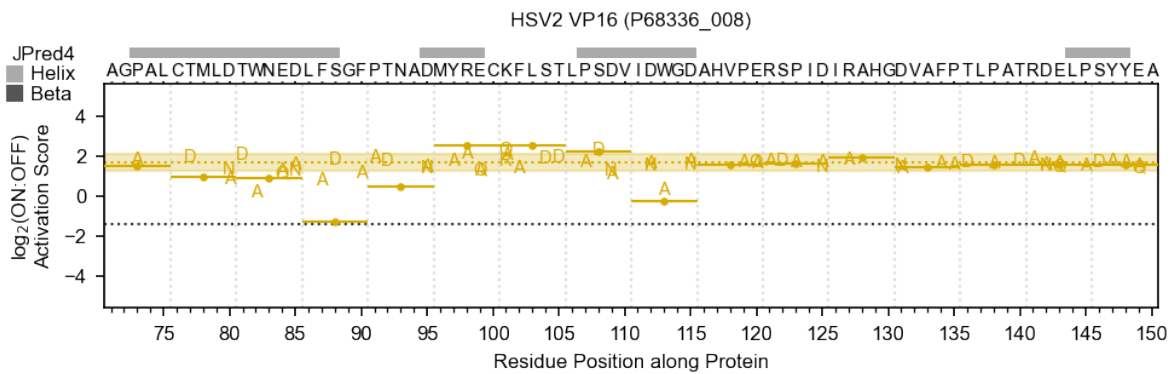

| Motif Name | Motif Start | Motif End | Motif Sequence | Overlaps Essential? | Essential Start | Essential End | Essential Sequence |
|------------|-------------|-----------|----------------|---------------------|-----------------|---------------|--------------------|
| SUMO_rev   | 95          | 103       | DMYRECKFL      | No                  | -               | -             |                    |

Extended repression domain from residues 61 to 160:

NRLDDLGFSAGPALCTMLDWTNEDLFSGFPTNADMYRECKFLSTLPSDVIDWGDHVPERSPIDIRAHGDVAFPTLPATRDELPSYEEAMAQFFRGEL  
R

Max tile of repression domain from residues 81 to 160 (estimated 33.6% to 40.3% of cells repressed):

TWNEDLFSGFPTNADMYRECKFLSTLPSDVIDWGDHVPERSPIDIRAHGDVAFPTLPATRDELPSYEEAMAQFFRGELR

Extended activation domain from residues 361 to 490:

AYSRRGRTRNNYGSTIEGLLDLPDDDDAPAEAGLVAPRMSFSLGQRPRRLSTTAPITDVSLGDELRLDGEVDMTPADALDDFDLEMLGDVESPSGMT  
HDPVSYGALDVDDFEFEQMFTDAMGIDDFGG

Max tile of activation domain from residues 371 to 450 (estimated 94.4% to 94.7% of cells activated):

YGSTIEGLLDLPDDDDAPAEAGLVAPRMSFSLGQRPRRLSTTAPITDVSLGDELRLDGEVDMTPADALDDFDLEMLGD

Herpesvirus Tiling and Perturbation Screen Data from Ludwig, C.H. et al. 2023

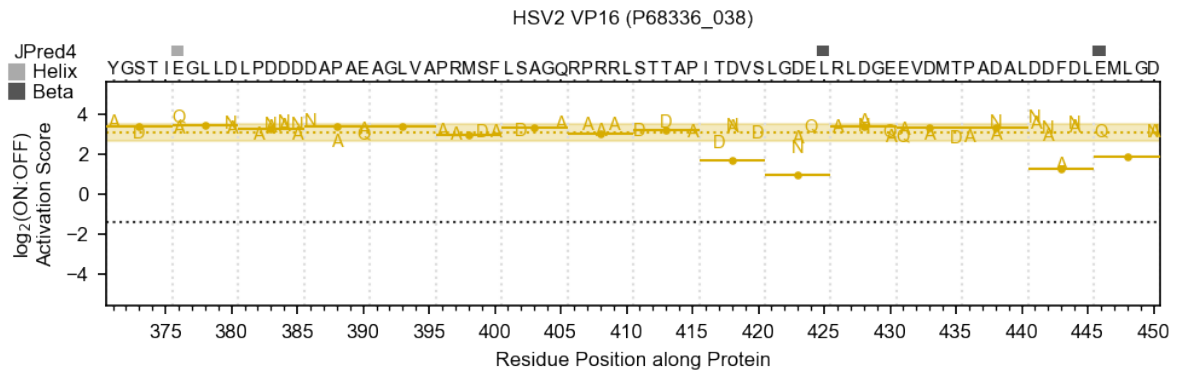

| Motif Name   | Motif Start | Motif End | Motif Sequence | Overlaps Essential? | Essential Start | Essential End | Essential Sequence |
|--------------|-------------|-----------|----------------|---------------------|-----------------|---------------|--------------------|
| flexi_NRBOX  | 374         | 380       | TIEGLLD        | No                  | -               | -             |                    |
| SUMO_SIM_par | 376         | 386       | EGLLDLPDDDD    | No                  | -               | -             |                    |

VZV VP16 (P09265)

Gene: ORF10 ; Protein Family: VP16

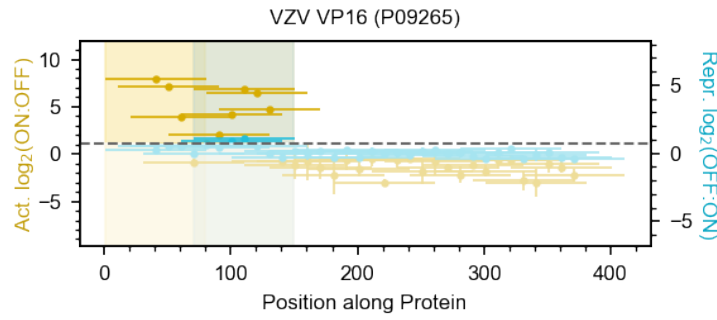

Extended activation domain from residues 1 to 100:

MECNLGTEHPSTDTWNRSKTEQAVVDADFDESFLGVDVASDIGFETSLYSHAVKTAPSPPWVWASP KILYQQLIRDLD FSEGPRLLSCLETWNEDLFSCFPIN

Max tile of activation domain from residues 1 to 80 (estimated 85.1% to 87.5% of cells activated):

MECNLGTEHPSTDTWNRSKTEQAVVDADFDESFLGVDVASDIGFETSLYSHAVKTAPSPPWVWASP KILYQQLIRDLD FSEGP

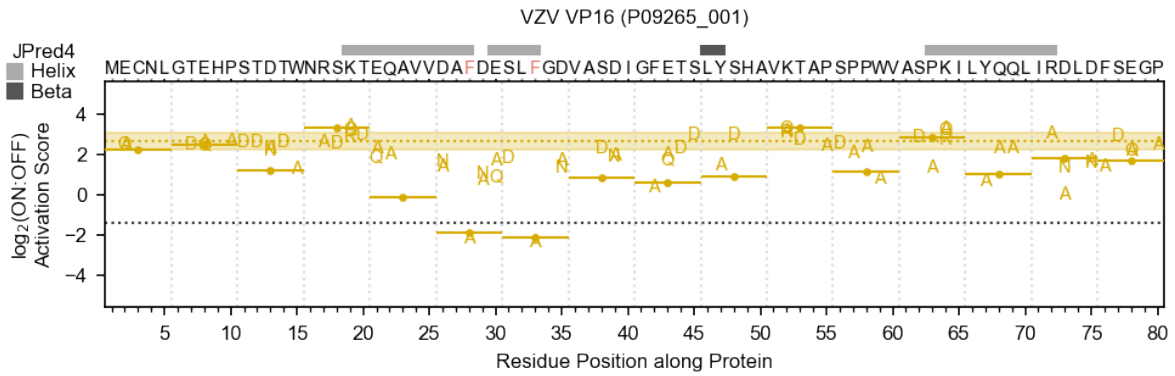

| Motif Name | Motif Start | Motif End | Motif Sequence | Overlaps Essential? | Essential Start | Essential End | Essential Sequence |
|------------|-------------|-----------|----------------|---------------------|-----------------|---------------|--------------------|
|            | -           | -         |                | No                  | 26              | 35            | DAFDESFLGD         |

Extended activation domain from residues 51 to 170:

VKTAPSPPWVWASP KILYQQLIRDLD FSEGPRLLSCLETWNEDLFSCFPIN EDLYSDMMVLSPDPDDVISTVSTKDHVEMFNL TTRGSRVRLPSPPKQPTGL PAYVQEVQDSFTVELRAREE

Max tile of activation domain from residues 71 to 150 (estimated 71.2% to 75.5% of cells activated):

IRDLD FSEGPRLLSCLETWNEDLFSCFPIN EDLYSDMMVLSPDPDDVISTVSTKDHVEMFNL TTRGSRVRLPSPPKQPTGL

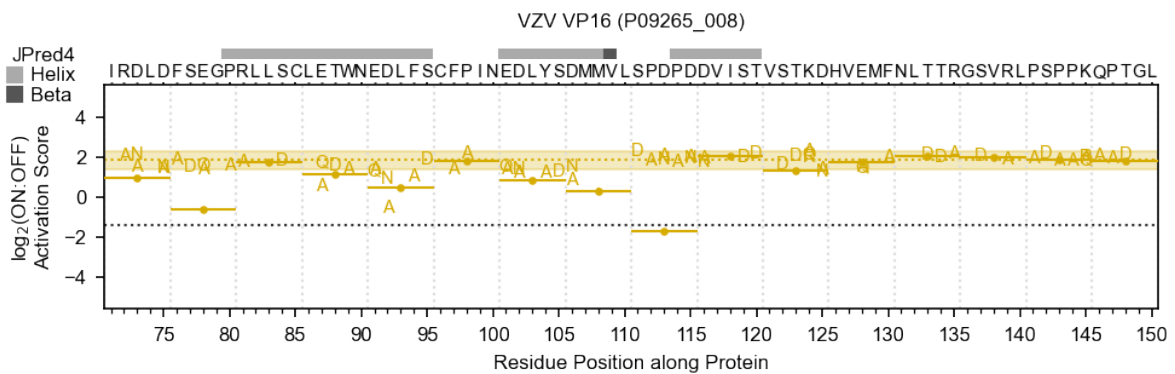

| Motif Name | Motif Start | Motif End | Motif Sequence | Overlaps Essential? | Essential Start | Essential End | Essential Sequence |
|------------|-------------|-----------|----------------|---------------------|-----------------|---------------|--------------------|
|            | -           | -         |                | No                  | 111             | 115           | SPDPD              |

Extended repression domain from residues 61 to 150:

ASP KILYQQLIRDLD FSEGPRLLSCLETWNEDLFSCFPIN EDLYSDMMVLSPDPDDVISTVSTKDHVEMFNL TTRGSRVRLPSPPKQPTGL

Herpesvirus Tiling and Perturbation Screen Data from Ludwig, C.H. et al. 2023

Max tile of repression domain from residues 71 to 150 (estimated 18.8% to 22.5% of cells repressed):

IRDLDFSEGPRLLSCLETWNEDLFSCFPINEDLYSDMMVLSPDPDDVISTVSTKDHVEMFNLTTTRGSVRLPSPPKQPTGL

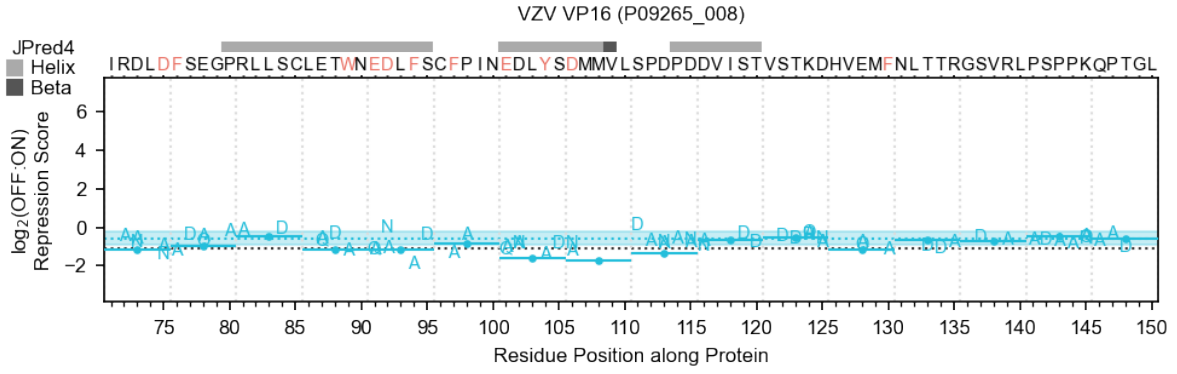

| Motif Name | Motif Start | Motif End | Motif Sequence | Overlaps Essential? | Essential Start | Essential End | Essential Sequence |
|------------|-------------|-----------|----------------|---------------------|-----------------|---------------|--------------------|
|            | -           | -         |                | No                  | 71              | 75            | IRDL               |
|            | -           | -         |                | No                  | 86              | 95            | LETWNEDLFS         |
|            | -           | -         |                | No                  | 101             | 115           | EDLYSDMMVLSPDPD    |
|            | -           | -         |                | No                  | 126             | 130           | HVEMF              |

HSV2 VPK (P89436)

Gene: UL13 ; Protein Family: VPK

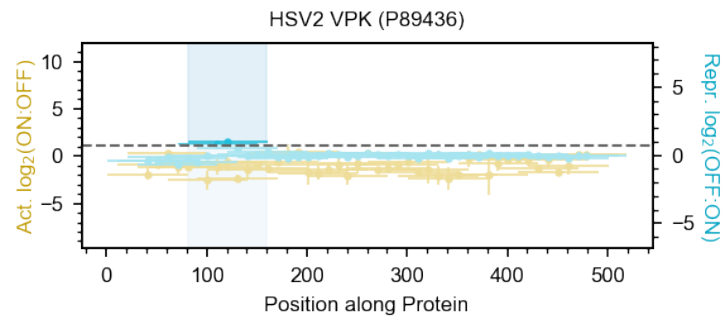

---

Extended repression domain from residues 71 to 160:

ERLRAGLSRWRVSRSSRRSSPEAPGPAAKLRRPPLRRSETAMTSPSPSHILSLARIHKLCIPVFAVNPALRYTTLEIPGARSFGGSG

Max tile of repression domain from residues 81 to 160 (estimated 18.4% to 20.2% of cells repressed):

RVSRSSRRSSPEAPGPAAKLRRPPLRRSETAMTSPSPSHILSLARIHKLCIPVFAVNPALRYTTLEIPGARSFGGSG

---

KSHV VPK (F5HGH5)

Gene: ORF36 ; Protein Family: VPK

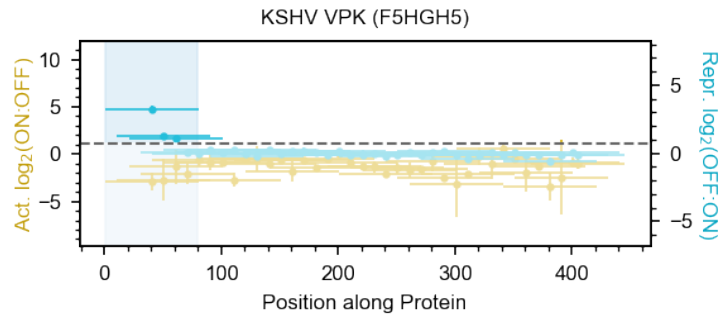

Extended repression domain from residues 1 to 100:

MRWKRMEERRPPLPLRRSRTQSSGGGLTICPRCALKLPKATRISERPWASTWQLNQHIQVSKTKKATAYLKAPREWQCTHQDPDWSKRLGRGAFGII  
VP

Max tile of repression domain from residues 1 to 80 (estimated 70.4% to 80.6% of cells repressed):

MRWKRMEERRPPLPLRRSRTQSSGGGLTICPRCALKLPKATRISERPWASTWQLNQHIQVSKTKKATAYLKAPREWQCT

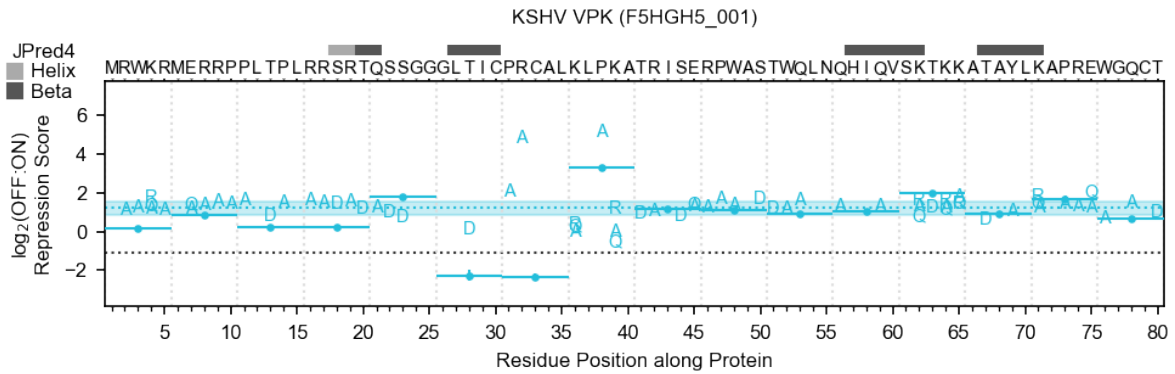

| Motif Name | Motif Start | Motif End | Motif Sequence | Overlaps Essential? | Essential Start | Essential End | Essential Sequence |
|------------|-------------|-----------|----------------|---------------------|-----------------|---------------|--------------------|
| MYND_1     | 10          | 14        | PPLTP          | No                  | -               | -             |                    |
|            | -           | -         |                | No                  | 26              | 35            | GLTICPRCAL         |

Other Tiling Screen Data from Ludwig, C.H. et al. 2023

BKPyV Agnoprotein (P14998)

Gene: Agnoprotein ; Protein Family: Agnoprotein

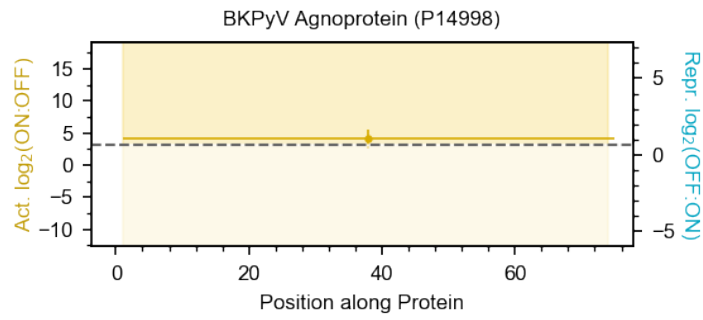

---

Extended activation domain from residues 1 to 74:

MFCEPKNLVLRQLSRQASVKGKTTWTGTTKRAQRIFIFILELLEFCRGEDSVDGKNKSTTALPAVKDSVKDS

Max tile of activation domain from residues 1 to 74 (estimated 9.1% to 47.6% of cells activated):

MFCEPKNLVLRQLSRQASVKGKTTWTGTTKRAQRIFIFILELLEFCRGEDSVDGKNKSTTALPAVKDSVKDS

---



HFV BEL1 (P14353)

Gene: BEL1 ; Protein Family: BEL1

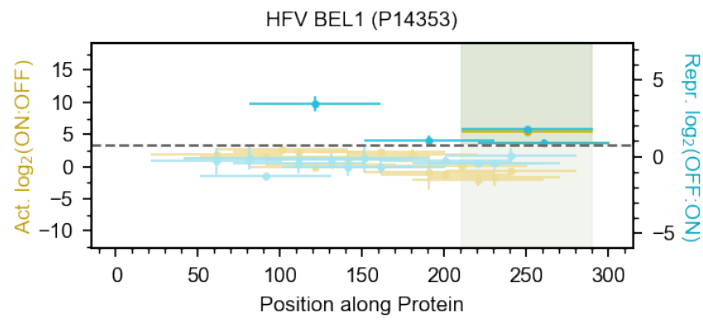

---

Extended activation domain from residues 211 to 300:

KHHKPRQKRPRRRSIDNESCASSDTMANEPGSLCTNPLWNPGLLSGLLEESSNLPNLEVHMSGGPFWEEVYGDSILGPPSGSGEHSVL

Max tile of activation domain from residues 211 to 290 (estimated 43.0% to 48.9% of cells activated):

KHHKPRQKRPRRRSIDNESCASSDTMANEPGSLCTNPLWNPGLLSGLLEESSNLPNLEVHMSGGPFWEEVYGDSILGP

---

Extended repression domain from residues 211 to 300:

KHHKPRQKRPRRRSIDNESCASSDTMANEPGSLCTNPLWNPGLLSGLLEESSNLPNLEVHMSGGPFWEEVYGDSILGPPSGSGEHSVL

Max tile of repression domain from residues 211 to 290 (estimated 32.4% to 34.1% of cells repressed):

KHHKPRQKRPRRRSIDNESCASSDTMANEPGSLCTNPLWNPGLLSGLLEESSNLPNLEVHMSGGPFWEEVYGDSILGP

---

Other Tiling Screen Data from Ludwig, C.H. et al. 2023

SFV BEL1 (Q87042)

Gene: BEL1 ; Protein Family: BEL1

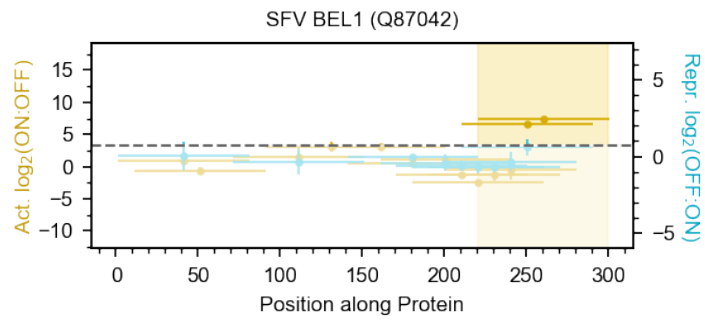

---

Extended activation domain from residues 211 to 300:

KHHKPRPKRSRKRKSIDHESCASSGDTVANESGPLCTNTFWTPGPNLQGLLGESSNLPDLEVHMSGGPFWKEVYGDSILGPPSGSGEHSVL

Max tile of activation domain from residues 221 to 300 (estimated 72.9% to 81.1% of cells activated):

RKRSIDHESCASSGDTVANESGPLCTNTFWTPGPNLQGLLGESSNLPDLEVHMSGGPFWKEVYGDSILGPPSGSGEHSVL

---

CeHV1 DBP (Q805Z9)

Gene: UL29 ; Protein Family: DBP

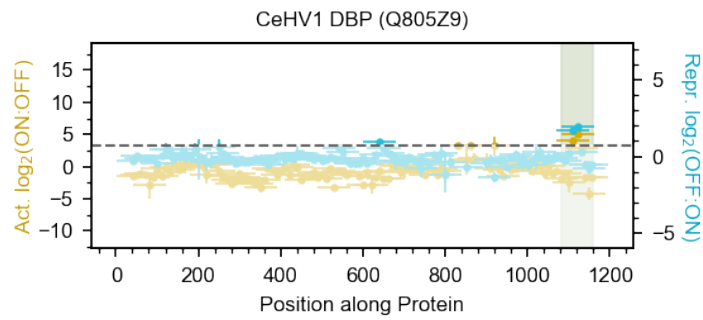

---

Extended activation domain from residues 1071 to 1160:

VAAVKSLGNRTPQLQIEDWLALLEDEYLSEEMMAFTARALERGGGEWAAEALEVAHEAEALVTQTGGADGGEVDFGAFGVDDDEVPSF

Max tile of activation domain from residues 1081 to 1160 (estimated 35.6% to 40.5% of cells activated):

TPQLQIEDWLALLEDEYLSEEMMAFTARALERGGGEWAAEALEVAHEAEALVTQTGGADGGEVDFGAFGVDDDEVPSF

---

Extended repression domain from residues 1071 to 1160:

VAAVKSLGNRTPQLQIEDWLALLEDEYLSEEMMAFTARALERGGGEWAAEALEVAHEAEALVTQTGGADGGEVDFGAFGVDDDEVPSF

Max tile of repression domain from residues 1081 to 1160 (estimated 36.2% to 37.5% of cells repressed):

TPQLQIEDWLALLEDEYLSEEMMAFTARALERGGGEWAAEALEVAHEAEALVTQTGGADGGEVDFGAFGVDDDEVPSF

---

CeHV2 DBP (Q5Y0S3)

Gene: UL29 ; Protein Family: DBP

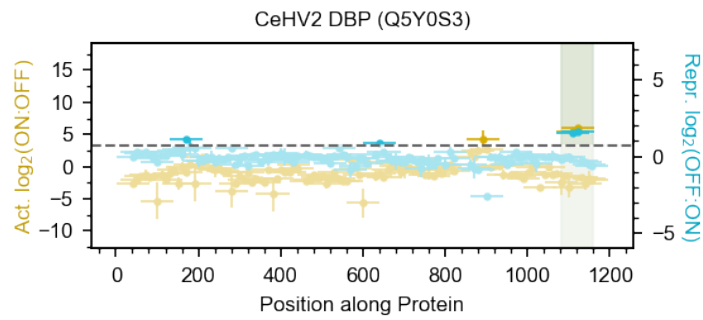

---

Extended activation domain from residues 1071 to 1160:

VAAVKSLGNRTPQLQIEDWLALLEDEYLGEEMMAFTARALERGGGEWTTEAALEVAHEAEALVTQTGGADVGEAFDFGAFGAEDDDAPTF

Max tile of activation domain from residues 1081 to 1160 (estimated 51.3% to 58.3% of cells activated):

TPQLQIEDWLALLEDEYLGEEMMAFTARALERGGGEWTTEAALEVAHEAEALVTQTGGADVGEAFDFGAFGAEDDDAPTF

---

Extended repression domain from residues 1071 to 1160:

VAAVKSLGNRTPQLQIEDWLALLEDEYLGEEMMAFTARALERGGGEWTTEAALEVAHEAEALVTQTGGADVGEAFDFGAFGAEDDDAPTF

Max tile of repression domain from residues 1081 to 1160 (estimated 29.2% to 29.6% of cells repressed):

TPQLQIEDWLALLEDEYLGEEMMAFTARALERGGGEWTTEAALEVAHEAEALVTQTGGADVGEAFDFGAFGAEDDDAPTF

---

HHV7 DBP (O56282)

Gene: U41 ; Protein Family: DBP

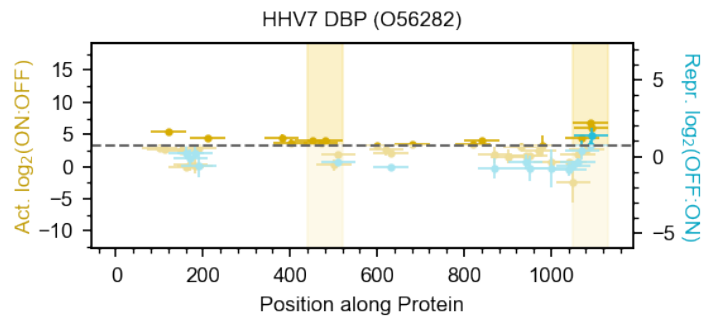

---

Extended activation domain from residues 1051 to 1131:

DGREPLAKSVMNKIQHLTDLNVHDFSLSTLLSVFEEQVEDSAAIYDFSELLVEGNEQFGILKCEETEHENEEPSLKKARL

Max tile of activation domain from residues 1051 to 1130 (estimated 65.9% to 73.2% of cells activated):

DGREPLAKSVMNKIQHLTDLNVHDFSLSTLLSVFEEQVEDSAAIYDFSELLVEGNEQFGILKCEETEHENEEPSLKKAR

---

Extended activation domain from residues 431 to 520:

SHIIWNLNRMSIYNTNCGNSEIYNHIVNCSSNLCEFCGKCHSCIGTALIRINSRLPQISKTTKKEPIVMTMFSRFYADVDVLGSFGKK

Max tile of activation domain from residues 441 to 520 (estimated 21.0% to 24.3% of cells activated):

SIYNTNCGNSEIYNHIVNCSSNLCEFCGKCHSCIGTALIRINSRLPQISKTTKKEPIVMTMFSRFYADVDVLGSFGKK

---

KSHV DBP (K0FHU3)

Gene: ORF6 ; Protein Family: DBP

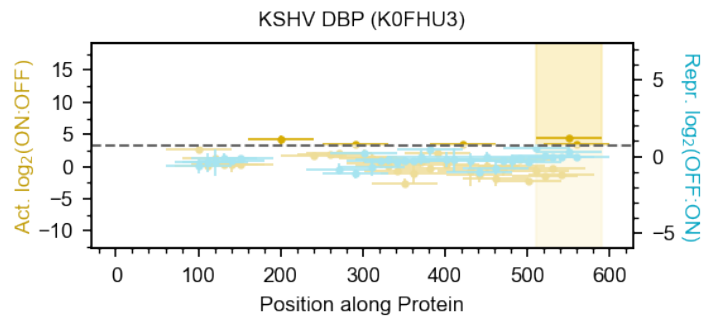

---

Extended activation domain from residues 511 to 598:

GPYAVLGDEVLSLLSTVGQAGVPWTAEGVASVIQDIIDDCELQFVGPEEPCLIQGQSVVEELFPSPGVPSLTVGKKRKIASLLSDL

Max tile of activation domain from residues 511 to 590 (estimated 21.9% to 33.4% of cells activated):

GPYAVLGDEVLSLLSTVGQAGVPWTAEGVASVIQDIIDDCELQFVGPEEPCLIQGQSVVEELFPSPGVPSLTVGKKRKIA

---

HAdV12 E1A (P03259)

Gene: E1A ; Protein Family: E1A

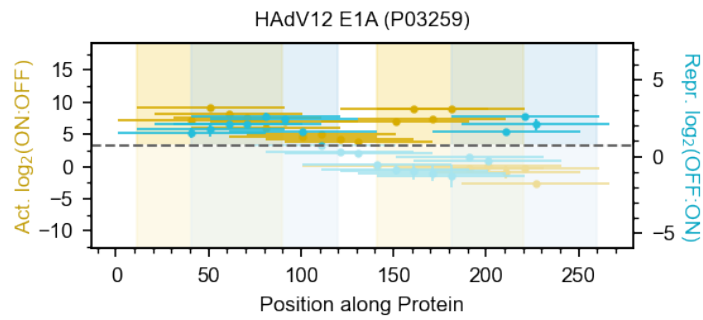

Extended activation domain from residues 1 to 170:

MRTEMTPLVLSYQEADDILEHLVDNFFNEVPSDDDLVPSLYELYDLDESAGEDNNEQAVNEFFPESLILAASEGLFLPEPPVLSPVCEPIGGECMPQLHPEDMDLLCYEMGFPCSDSEDEQDENGMAHVSASAAAAAADREREEFQLDHPPELPGHNCKSCEHHRNSTG

Max tile of activation domain from residues 11 to 90 (estimated 90.9% to 92.0% of cells activated):

SYQEADDILEHLVDNFFNEVPSDDDLVPSLYELYDLDESAGEDNNEQAVNEFFPESLILAASEGLFLPEPPVLSPVCE

Extended activation domain from residues 111 to 220:

EMGFPCSDSEDEQDENGMAHVSASAAAAAADREREEFQLDHPPELPGHNCKSCEHHRNSTGNTDLMCSLCYL RAYNMFYSPVSDNEPEPNSTLDGDERPSPKLGSAVPE

Max tile of activation domain from residues 141 to 220 (estimated 88.3% to 92.2% of cells activated):

DREREEFQLDHPPELPGHNCKSCEHHRNSTGNTDLMCSLCYL RAYNMFYSPVSDNEPEPNSTLDGDERPSPKLGSAVPE

Extended repression domain from residues 1 to 150:

MRTEMTPLVLSYQEADDILEHLVDNFFNEVPSDDDLVPSLYELYDLDESAGEDNNEQAVNEFFPESLILAASEGLFLPEPPVLSPVCEPIGGECMPQLHPEDMDLLCYEMGFPCSDSEDEQDENGMAHVSASAAAAAADREREEFQLD

Max tile of repression domain from residues 41 to 120 (estimated 47.9% to 66.3% of cells repressed):

LYELYDLDESAGEDNNEQAVNEFFPESLILAASEGLFLPEPPVLSPVCEPIGGECMPQLHPEDMDLLCYEMGFPCSDSE

Extended repression domain from residues 171 to 266:

NTDLMCSLCYL RAYNMFYSPVSDNEPEPNSTLDGDERPSPKLGSAVPEGVIKVPQRVTGRRRC AVESILDLIQEEEREQTVPVDLSVKRPRCN

Max tile of repression domain from residues 181 to 260 (estimated 52.8% to 61.0% of cells repressed):

L RAYNMFYSPVSDNEPEPNSTLDGDERPSPKLGSAVPEGVIKVPQRVTGRRRC AVESILDLIQEEEREQTVPVDLSV

Other Tiling Screen Data from Ludwig, C.H. et al. 2023

HAdV40 E1A (P10541)

Gene: E1A ; Protein Family: E1A

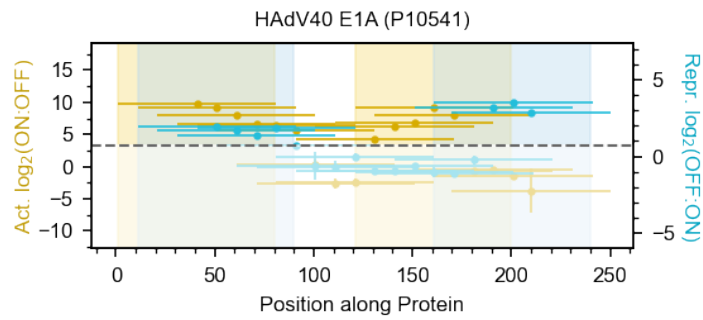

---

Extended activation domain from residues 1 to 130:

MRMLPDDFFTGNWDDMFQGLLETEYVDFPEPSEASEEMSLHDLFDVEVDGFEEANQEAVDGMFPERLLSEAESAAESGSGDSGVGEELLPVLDLKC  
CYEDGLPPSDPETDEATEAEEEEAMPTYVNENE

Max tile of activation domain from residues 1 to 80 (estimated 93.3% to 93.7% of cells activated):

MRMLPDDFFTGNWDDMFQGLLETEYVDFPEPSEASEEMSLHDLFDVEVDGFEEANQEAVDGMFPERLLSEAESAAESGS

---

Extended activation domain from residues 91 to 210:

PVLDLKCIEDGLPPSDPETDEATEAEEEEAMPTYVNENENELVLDPCENPGRGCRACDFHRGTSGNPEAMCALCYMRLTGHCISPIDAEGESES  
SPEDTDFPHPLTATPPHGIVRT

Max tile of activation domain from residues 121 to 200 (estimated 91.3% to 91.8% of cells activated):

AMPTYVNENENELVLDPCENPGRGCRACDFHRGTSGNPEAMCALCYMRLTGHCISPIDAEGESES SPEDTDFPHPLT

---

Extended repression domain from residues 151 to 249:

HRGTSGNPEAMCALCYMRLTGHCISPIDAEGESES SPEDTDFPHPLTATPPHGIVRTIPCRVSCRRRPAVECIEDLLEEDPTDEPLNLSLKRPKCS

Max tile of repression domain from residues 161 to 240 (estimated 81.9% to 86.1% of cells repressed):

MCALCYMRLTGHCISPIDAEGESES SPEDTDFPHPLTATPPHGIVRTIPCRVSCRRRPAVECIEDLLEEDPTDEPLN

---

Extended repression domain from residues 11 to 120:

NWDDMFQGLLETEYVDFPEPSEASEEMSLHDLFDVEVDGFEEANQEAVDGMFPERLLSEAESAAESGSGDSGVGEELLPVLDLKCIEDGLPPSD  
PETDEATEAEEEE

Max tile of repression domain from residues 11 to 90 (estimated 35.8% to 39.2% of cells repressed):

NWDDMFQGLLETEYVDFPEPSEASEEMSLHDLFDVEVDGFEEANQEAVDGMFPERLLSEAESAAESGSGDSGVGEELL

---



HAdV4 E1A (P10407)

Gene: E1A ; Protein Family: E1A

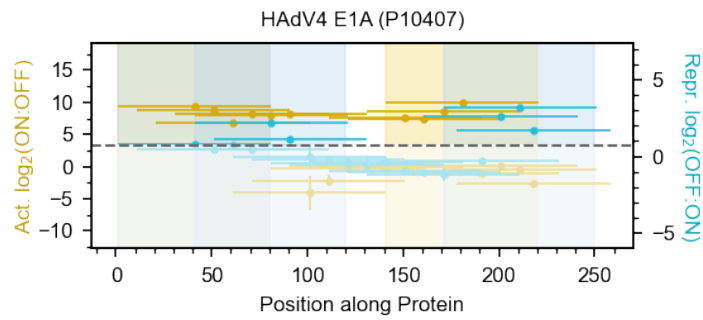

Extended activation domain from residues 111 to 220:

MDLRCEECLPPSDDDEDEQAIQNAASHGVQAVSESFALDCPPLPGHGCKSCEFHRINTGDKAVLCAALCYMRAYNHCYVSPVSDADDETPPTTESTLSPP  
EIGTSPSDNIVR

Max tile of activation domain from residues 141 to 220 (estimated 92.0% to 94.8% of cells activated):

AVSESFALDCPPLPGHGCKSCEFHRINTGDKAVLCAALCYMRAYNHCYVSPVSDADDETPPTTESTLSPP EIGTSPSDNIVR

Extended activation domain from residues 1 to 130:

MRHLRDLDPDEEIIASGSEILELVNATMGDDHPEPPTPFGTSLHDLYDLEVDVPEDDPNEKAVNDFSDAALLAAEEASSPSSDSDSSLHTPRHRGEEK  
EIPGLKWEKMDLRCEECLPPSDDDEDEQA

Max tile of activation domain from residues 1 to 80 (estimated 91.8% to 92.5% of cells activated):

MRHLRDLDPDEEIIASGSEILELVNATMGDDHPEPPTPFGTSLHDLYDLEVDVPEDDPNEKAVNDFSDAALLAAEEA

Extended repression domain from residues 161 to 257:

CEFHRINTGDKAVLCAALCYMRAYNHCYVSPVSDADDETPPTTESTLSPP EIGTSPSDNIVR VPVVRATGRRAAVECLDDLLQGGDEPLDLCTRKRPRH

Max tile of repression domain from residues 171 to 250 (estimated 71.1% to 79.1% of cells repressed):

KAVLCAALCYMRAYNHCYVSPVSDADDETPPTTESTLSPP EIGTSPSDNIVR VPVVRATGRRAAVECLDDLLQGGDEPLDLCL

Extended repression domain from residues 41 to 130:

GTPSLHDLYDLEVDVPEDDPNEKAVNDFSDAALLAAEEASSPSSDSDSSLHTPRHRGEEK EIPGLKWEKMDLRCEECLPPSDDDEDEQA

Max tile of repression domain from residues 41 to 120 (estimated 41.2% to 45.1% of cells repressed):

GTPSLHDLYDLEVDVPEDDPNEKAVNDFSDAALLAAEEASSPSSDSDSSLHTPRHRGEEK EIPGLKWEKMDLRCEECL

Extended repression domain from residues 1 to 80:

MRHLRDLDPDEEIIASGSEILELVNATMGDDHPEPPTPFGTSLHDLYDLEVDVPEDDPNEKAVNDFSDAALLAAEEA

Max tile of repression domain from residues 1 to 80 (estimated 17.9% to 20.0% of cells repressed):

MRHLRDLDPDEEIIASGSEILELVNATMGDDHPEPPTPFGTSLHDLYDLEVDVPEDDPNEKAVNDFSDAALLAAEEA

HAdV5 E1A (P03255)

Gene: E1A ; Protein Family: E1A

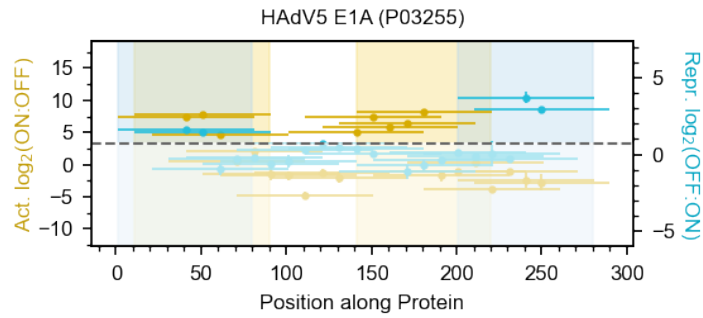

Extended activation domain from residues 101 to 220:

QPEQRALGPVSMPLVPEVIDLTCEAGFPPSDDDEEGEEFVLDYVEHPGHGCRSCHYHRRNTGDPDIMCSLCYMRTCGMFVYSPVSEPEPEPEPEPEPARPTRRPKMAPAILRRPTSP

Max tile of activation domain from residues 141 to 220 (estimated 85.9% to 86.5% of cells activated):

EFVLDYVEHPGHGCRSCHYHRRNTGDPDIMCSLCYMRTCGMFVYSPVSEPEPEPEPEPEPARPTRRPKMAPAILRRPTSP

Extended activation domain from residues 1 to 100:

MRHIICHGGVITEEMAASLLDQLIEEVLADNLPPPSHFEPPTLHELVDLDTAPEDPNEEAVSQIFPDSVMLAVQEGIDLLTFPPAPGSPEPPHLSRQPE

Max tile of activation domain from residues 11 to 90 (estimated 81.3% to 84.4% of cells activated):

ITEEMAASLLDQLIEEVLADNLPPPSHFEPPTLHELVDLDTAPEDPNEEAVSQIFPDSVMLAVQEGIDLLTFPPAPGSP

Extended repression domain from residues 201 to 289:

ARPTRRPKMAPAILRRPTSPVSRECNSSDSCDSGPSNTPEIHPVVPLCPIKPVAVRVGGRRQAVECIEDLLNEPGQPLDLCKRPRP

Max tile of repression domain from residues 201 to 280 (estimated 78.9% to 92.7% of cells repressed):

ARPTRRPKMAPAILRRPTSPVSRECNSSDSCDSGPSNTPEIHPVVPLCPIKPVAVRVGGRRQAVECIEDLLNEPGQPL

Extended repression domain from residues 1 to 90:

MRHIICHGGVITEEMAASLLDQLIEEVLADNLPPPSHFEPPTLHELVDLDTAPEDPNEEAVSQIFPDSVMLAVQEGIDLLTFPPAPGSP

Max tile of repression domain from residues 1 to 80 (estimated 26.2% to 32.5% of cells repressed):

MRHIICHGGVITEEMAASLLDQLIEEVLADNLPPPSHFEPPTLHELVDLDTAPEDPNEEAVSQIFPDSVMLAVQEGIDL

HAdV7 E1A (P03256)

Gene: E1A ; Protein Family: E1A

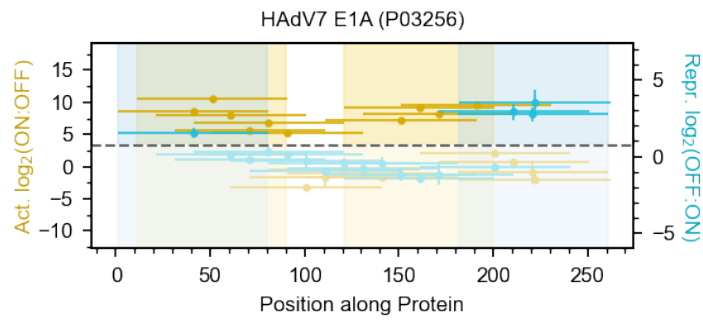

Extended activation domain from residues 1 to 130:

MRHLRFLPQEIIISSETGIEILEFVNNTLMGDDPEPPVQPFDPPTLHDLYDLEVDGPEDPNEGAVNGFFTDSMLLAADEGLDINPPPETLVTPGVVVESEGRG  
GKKLPDLGAAEMDLRCYEEGFPPSDDDEDG

Max tile of activation domain from residues 11 to 90 (estimated 94.1% to 95.6% of cells activated):

IISSETGIEILEFVNNTLMGDDPEPPVQPFDPPTLHDLYDLEVDGPEDPNEGAVNGFFTDSMLLAADEGLDINPPPETLV

Extended activation domain from residues 111 to 210:

AEMDLRCYEEGFPPSDDDEDGETEQSIHTAVNEGVKAAASDVFKLDCPELPGHGCKSCEFHRNNTGMKELLCSLCYMRMHCHFIYSPVSDDESPPDSTT  
SP

Max tile of activation domain from residues 121 to 200 (estimated 90.4% to 92.3% of cells activated):

GFPPSDDDEDGETEQSIHTAVNEGVKAAASDVFKLDCPELPGHGCKSCEFHRNNTGMKELLCSLCYMRMHCHFIYSPVSDDE

Extended repression domain from residues 171 to 261:

NNTGMKELLCSLCYMRMHCHFIYSPVSDDESPPDSTTSPPEIQAPAPANVCKPIPVKPKPGKRPVAVDKLEDLLEGGDGPLDLSTRKLPRQ

Max tile of repression domain from residues 182 to 261 (estimated 62.3% to 95.3% of cells repressed):

LCYMRMHCHFIYSPVSDDESPPDSTTSPPEIQAPAPANVCKPIPVKPKPGKRPVAVDKLEDLLEGGDGPLDLSTRKLPRQ

Extended repression domain from residues 1 to 80:

MRHLRFLPQEIIISSETGIEILEFVNNTLMGDDPEPPVQPFDPPTLHDLYDLEVDGPEDPNEGAVNGFFTDSMLLAADEGL

Max tile of repression domain from residues 1 to 80 (estimated 22.6% to 35.6% of cells repressed):

MRHLRFLPQEIIISSETGIEILEFVNNTLMGDDPEPPVQPFDPPTLHDLYDLEVDGPEDPNEGAVNGFFTDSMLLAADEGL

HAdV9 E1A (Q9YLA0)

Gene: E1A ; Protein Family: E1A

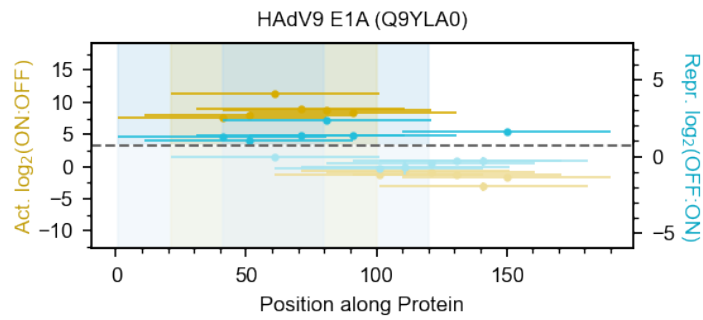

Extended activation domain from residues 1 to 130:

MRHLRLLPSTVPGELAVLMLDFVDTVLEDELHPSPFELGPTLQDLYDLEVDAHDDDPNNEEAVNLIFPESMILQADIANESTPLHTPTLSPIPELEEEDELD  
LRCYEEGFPPSDSEDERGPVSEDELSPS

Max tile of activation domain from residues 21 to 100 (estimated 95.4% to 96.0% of cells activated):

EDFVDTVLEDELHPSPFELGPTLQDLYDLEVDAHDDDPNNEEAVNLIFPESMILQADIANESTPLHTPTLSPIPELEEEDE

Extended repression domain from residues 31 to 130:

ELHPSPFELGPTLQDLYDLEVDAHDDDPNNEEAVNLIFPESMILQADIANESTPLHTPTLSPIPELEEEDELDLRCYEEGFPPSDSEDERGPVSEDELSPS

Max tile of repression domain from residues 41 to 120 (estimated 43.4% to 55.2% of cells repressed):

PTLQDLYDLEVDAHDDDPNNEEAVNLIFPESMILQADIANESTPLHTPTLSPIPELEEEDELDLRCYEEGFPPSDSEDERG

Extended repression domain from residues 1 to 90:

MRHLRLLPSTVPGELAVLMLDFVDTVLEDELHPSPFELGPTLQDLYDLEVDAHDDDPNNEEAVNLIFPESMILQADIANESTPLHTPTLS

Max tile of repression domain from residues 1 to 80 (estimated 22.5% to 24.7% of cells repressed):

MRHLRLLPSTVPGELAVLMLDFVDTVLEDELHPSPFELGPTLQDLYDLEVDAHDDDPNNEEAVNLIFPESMILQADIANE

HPV16 E2 (P03120)

Gene: E2 ; Protein Family: E2

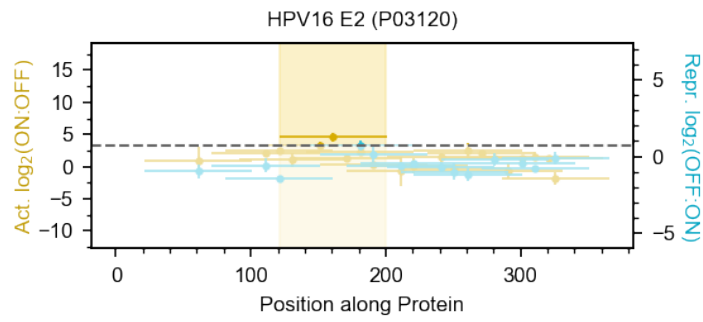

---

Extended activation domain from residues 111 to 200:

KKHGYTVEVQFDGDICNTMHYTNWTHIYICEEASVTVVEGQVDYYGLYYVHEGIRTYFVQFKDDAEKYSKNKVWEVHAGGQVILCPTSVF

Max tile of activation domain from residues 121 to 200 (estimated 21.0% to 43.5% of cells activated):

FDGDICNTMHYTNWTHIYICEEASVTVVEGQVDYYGLYYVHEGIRTYFVQFKDDAEKYSKNKVWEVHAGGQVILCPTSVF

---

Other Tiling Screen Data from Ludwig, C.H. et al. 2023

HAdV40 E4 (Q64857)

Gene: E4 ; Protein Family: E4

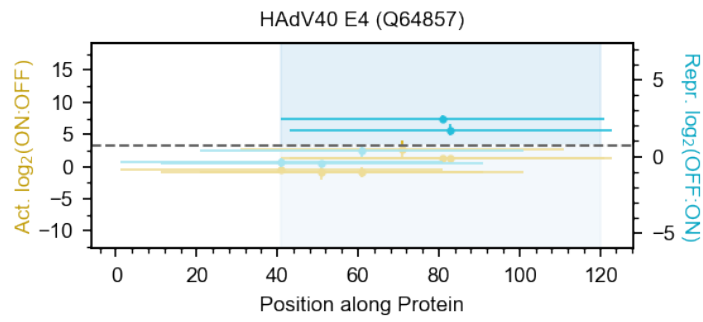

---

Extended repression domain from residues 41 to 122:

ECEHLNMHYSSALDSTVLLDDVSEGFISITDQRFASKEPVLILSQKNRCVNPQLQLFAVVQGEREVYKVKWKGGGRLTVRIL

Max tile of repression domain from residues 41 to 120 (estimated 44.1% to 59.8% of cells repressed):

ECEHLNMHYSSALDSTVLLDDVSEGFISITDQRFASKEPVLILSQKNRCVNPQLQLFAVVQGEREVYKVKWKGGGRLTVR

---

Other Tiling Screen Data from Ludwig, C.H. et al. 2023

HAdV9 E4 (P89083)

Gene: E4 ; Protein Family: E4

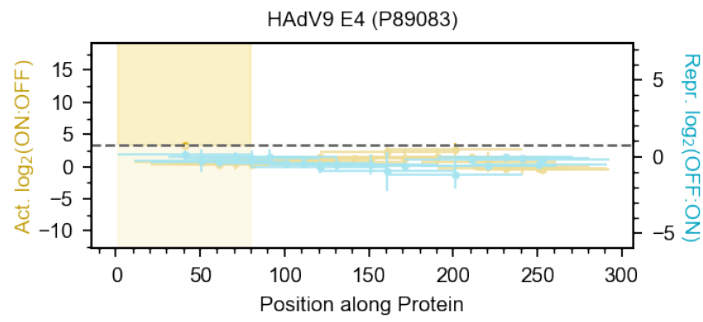

---

Extended activation domain from residues 1 to 80:

MQTEIQSSSLRHHPYRRARLPRSDEETRASLTEQHPLLPDCDHADYHNVSSVRGLPCAAGFTLLQEFPVPWDMILTPEEI

Max tile of activation domain from residues 1 to 80 (estimated 13.9% to 15.8% of cells activated):

MQTEIQSSSLRHHPYRRARLPRSDEETRASLTEQHPLLPDCDHADYHNVSSVRGLPCAAGFTLLQEFPVPWDMILTPEEI

---

HPV5 E6 (P06930)

Gene: E6 ; Protein Family: E6

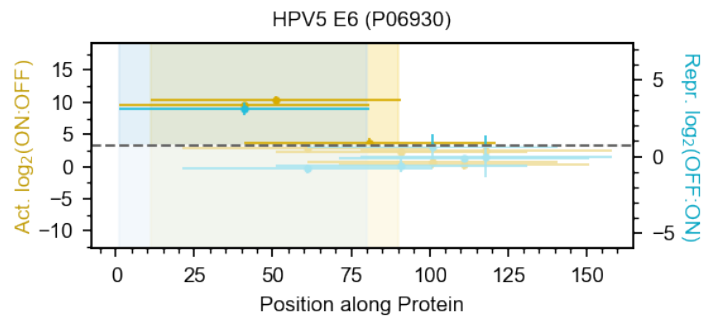

---

Extended activation domain from residues 1 to 90:

MAEGAEHQQLTEKDKAELPLSIRDLAELGIPVIDCLIPCNFCGNFLNYLEACEFDYKRLSLIWKDYCVFACCRVCCGATATYEFNQFY

Max tile of activation domain from residues 11 to 90 (estimated 93.4% to 95.6% of cells activated):

LTEKDKAELPLSIRDLAELGIPVIDCLIPCNFCGNFLNYLEACEFDYKRLSLIWKDYCVFACCRVCCGATATYEFNQFY

---

Extended repression domain from residues 1 to 80:

MAEGAEHQQLTEKDKAELPLSIRDLAELGIPVIDCLIPCNFCGNFLNYLEACEFDYKRLSLIWKDYCVFACCRVCCGA

Max tile of repression domain from residues 1 to 80 (estimated 59.5% to 83.1% of cells repressed):

MAEGAEHQQLTEKDKAELPLSIRDLAELGIPVIDCLIPCNFCGNFLNYLEACEFDYKRLSLIWKDYCVFACCRVCCGA

---



Other Tiling Screen Data from Ludwig, C.H. et al. 2023

HPV116 E7 (C7B7D3)

Gene: E7 ; Protein Family: E7

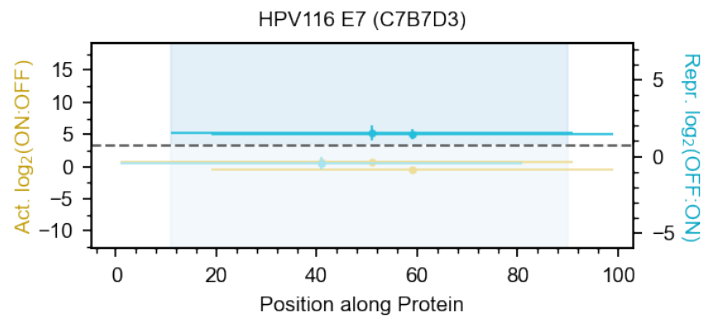

---

Extended repression domain from residues 11 to 98:

VELHLEELVIPANLLSDESLDETPEEEQLSPYRVDSLCTRCNKCIRISVVCTTGAIYTLQLLLSTELSFLCAGCSRTTVRNGRRF

Max tile of repression domain from residues 11 to 90 (estimated 21.1% to 38.3% of cells repressed):

VELHLEELVIPANLLSDESLDETPEEEQLSPYRVDSLCTRCNKCIRISVVCTTGAIYTLQLLLSTELSFLCAGCSRT

---

Other Tiling Screen Data from Ludwig, C.H. et al. 2023

HPV16 E7 (P03129)

Gene: E7 ; Protein Family: E7

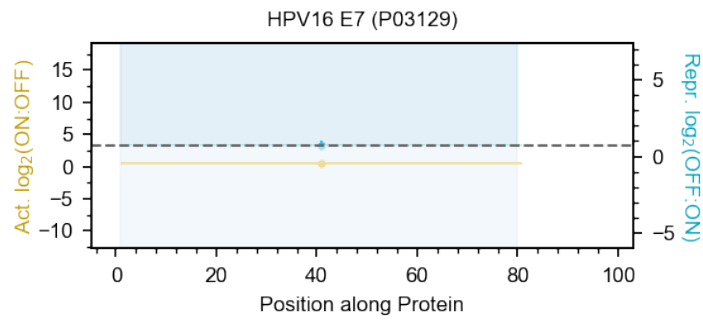

---

Extended repression domain from residues 1 to 80:

MHGDTPTLHEYMLDLQPETTDLYCYEQLNDSSEEEDEIDGPAGQAEPDRAHYNIVFCCKCDSTLRRCVQSTHVDIRTLE

Max tile of repression domain from residues 1 to 80 (estimated 16.4% to 21.0% of cells repressed):

MHGDTPTLHEYMLDLQPETTDLYCYEQLNDSSEEEDEIDGPAGQAEPDRAHYNIVFCCKCDSTLRRCVQSTHVDIRTLE

---

Extended repression domain from residues 1 to 80:

MHGDTPTLHEYMLDLQPETTDLYCYEQLNDSSEEEDEIDGPAGQAEPDRAHYNIVFCCKCDSTLRRCVQSTHVDIRTLE

Max tile of repression domain from residues 1 to 80 (estimated 16.4% to 21.0% of cells repressed):

MHGDTPTLHEYMLDLQPETTDLYCYEQLNDSSEEEDEIDGPAGQAEPDRAHYNIVFCCKCDSTLRRCVQSTHVDIRTLE

---

HPV1 E7 (P06465)

Gene: E7 ; Protein Family: E7

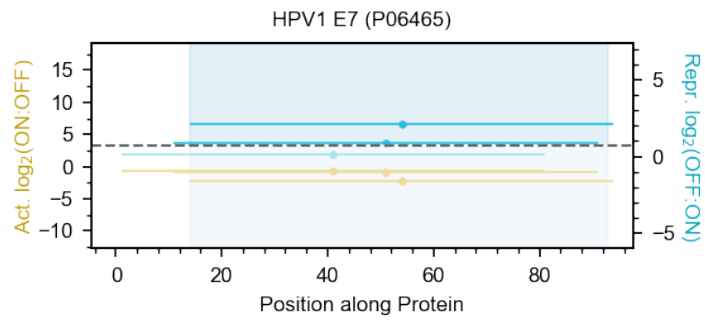

---

Extended repression domain from residues 11 to 93:

LVLQLEPSVLDLDLYCYEEVPPDDIEEELVSPQQPYAVVASCAYCEKLVRLTVLADHSAIRQLEELLRSLNIVCPLCTLQRQ

Max tile of repression domain from residues 14 to 93 (estimated 39.2% to 42.5% of cells repressed):

QLEPSVLDLDLYCYEEVPPDDIEEELVSPQQPYAVVASCAYCEKLVRLTVLADHSAIRQLEELLRSLNIVCPLCTLQRQ

---

Other Tiling Screen Data from Ludwig, C.H. et al. 2023

HPV41 E7 (P27556)

Gene: E7 ; Protein Family: E7

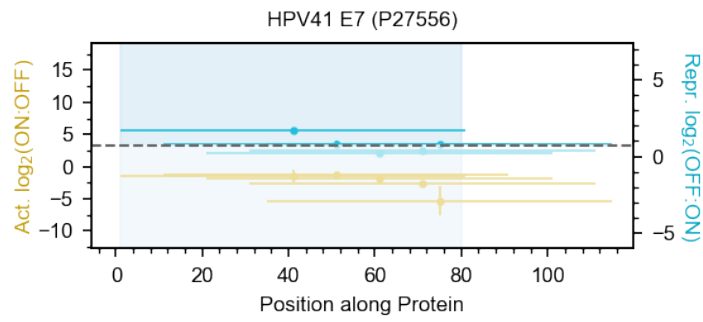

---

Extended repression domain from residues 1 to 90:

MRGNSVDLQEIVLVQQGEVPENAAVHSGEHSDDGESEEEEEEREQVQQVPTPRRTLYLVESQCPFCQAIIRFVCVASNTGIRNLQALLVNS

Max tile of repression domain from residues 1 to 80 (estimated 28.5% to 35.2% of cells repressed):

MRGNSVDLQEIVLVQQGEVPENAAVHSGEHSDDGESEEEEEEREQVQQVPTPRRTLYLVESQCPFCQAIIRFVCVASNTGI

---

Other Tiling Screen Data from Ludwig, C.H. et al. 2023

HPV5 E7 (P06932)

Gene: E7 ; Protein Family: E7

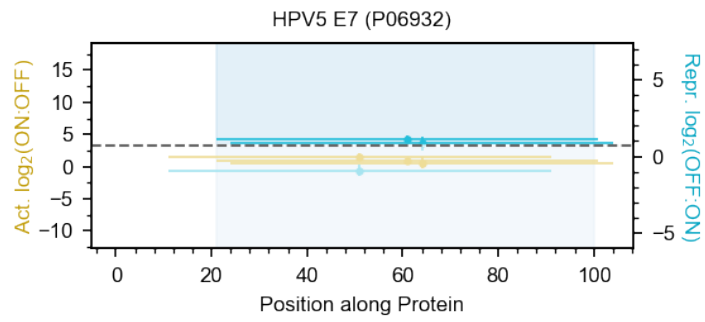

---

Extended repression domain from residues 21 to 103:

EVLPVDLFCEEELPNEQETEEEPDNERISYKVIAPCGCRNCEVKLRIFVHATEFGIRAFQQLLTGDLQLLCPDCRGNCKHDGS

Max tile of repression domain from residues 21 to 100 (estimated 20.2% to 24.5% of cells repressed):

EVLPVDLFCEEELPNEQETEEEPDNERISYKVIAPCGCRNCEVKLRIFVHATEFGIRAFQQLLTGDLQLLCPDCRGNCKH

---

HCMV ECP (P16801)

Gene: UL95 ; Protein Family: ECP

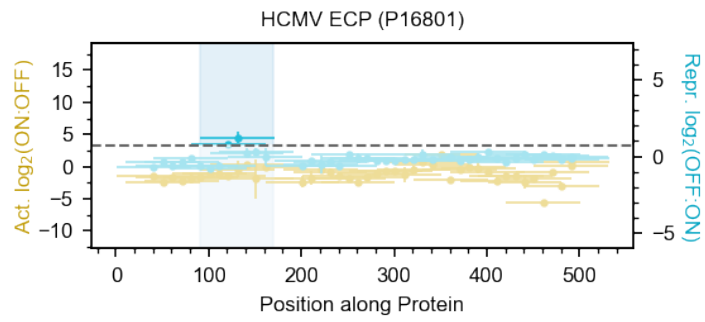

---

Extended repression domain from residues 81 to 170:

PSTAVRSPGSAGVSTSLCSVERMVLSAQSPAADFSVSEAWRFEEAVNMALVACEAVSPYDRFRLIETPDENFLLVTNVIPRESA EVPVL

Max tile of repression domain from residues 91 to 170 (estimated 19.2% to 28.6% of cells repressed):

AGVSTSLCSVERMVLSAQSPAADFSVSEAWRFEEAVNMALVACEAVSPYDRFRLIETPDENFLLVTNVIPRESA EVPVL

---

Other Tiling Screen Data from Ludwig, C.H. et al. 2023

HHV6A ECP (P24444)

Gene: U67 ; Protein Family: ECP

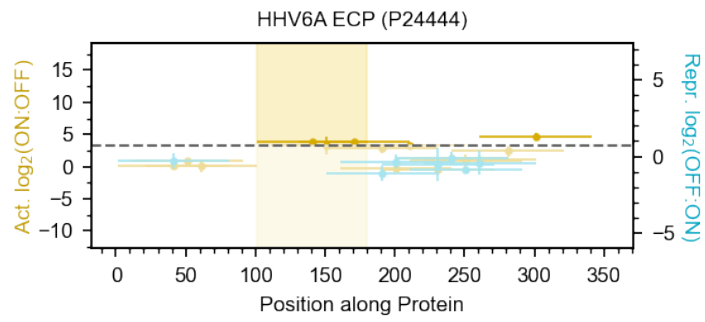

---

Extended activation domain from residues 101 to 190:

KSKKMARTYLLQNVLRRTQDQQVAISGKYILYTKKHIEISLMIDKTKLVKKILEYAETPNLLGYTDVRDLECLLWLVFCGPKSFCQSDSCF

Max tile of activation domain from residues 101 to 180 (estimated 17.3% to 22.0% of cells activated):

KSKKMARTYLLQNVLRRTQDQQVAISGKYILYTKKHIEISLMIDKTKLVKKILEYAETPNLLGYTDVRDLECLLWLVFCGP

---

Other Tiling Screen Data from Ludwig, C.H. et al. 2023

HCoV-NL63 E (Q6Q1S0)

Gene: E ; Protein Family: E

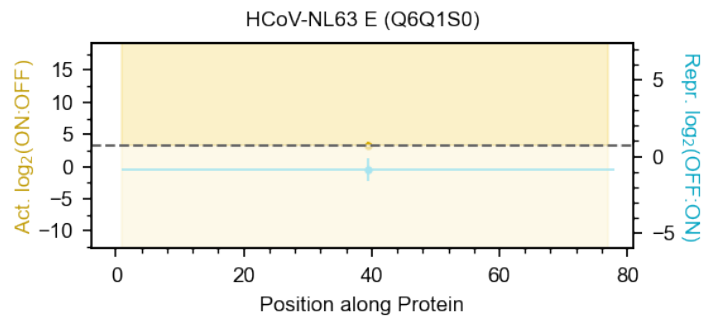

---

Extended activation domain from residues 1 to 77:

MFLRLIDDNGIVLNSILWLLVMIFFFVLAMTFIKLIQLCFTCHYFFSRTLYQPVYKIFLAYQDYMQUIAPVPAEVLNV

Max tile of activation domain from residues 1 to 77 (estimated 9.2% to 21.4% of cells activated):

MFLRLIDDNGIVLNSILWLLVMIFFFVLAMTFIKLIQLCFTCHYFFSRTLYQPVYKIFLAYQDYMQUIAPVPAEVLNV

---

Extended activation domain from residues 1 to 77:

MFLRLIDDNGIVLNSILWLLVMIFFFVLAMTFIKLIQLCFTCHYFFSRTLYQPVYKIFLAYQDYMQUIAPVPAEVLNV

Max tile of activation domain from residues 1 to 77 (estimated 6.2% to 7.0% of cells activated):

MFLRLIDDNGIVLNSILWLLVMIFFFVLAMTFIKLIQLCFTCHYFFSRTLYQPVYKIFLAYQDYMQUIAPVPAEVLNV

---



BPSV H4 (Q6TVC8)

Gene: H4 ; Protein Family: H4

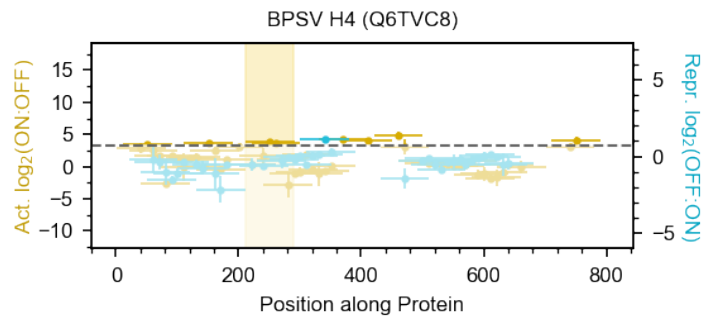

---

Extended activation domain from residues 211 to 300:

VFMYDLGVRIPVIRDFLDVKKVFLEATGKVYLNNFADDHPGIVEWGRAFVDAMAHDERRLLYKYVFLSSRHLCDMFTDLLNPRNAKFR

Max tile of activation domain from residues 211 to 290 (estimated 16.6% to 22.3% of cells activated):

VFMYDLGVRIPVIRDFLDVKKVFLEATGKVYLNNFADDHPGIVEWGRAFVDAMAHDERRLLYKYVFLSSRHLCDMFTD

---

Other Tiling Screen Data from Ludwig, C.H. et al. 2023

ORFV H4 (Q6TVR0)

Gene: H4 ; Protein Family: H4

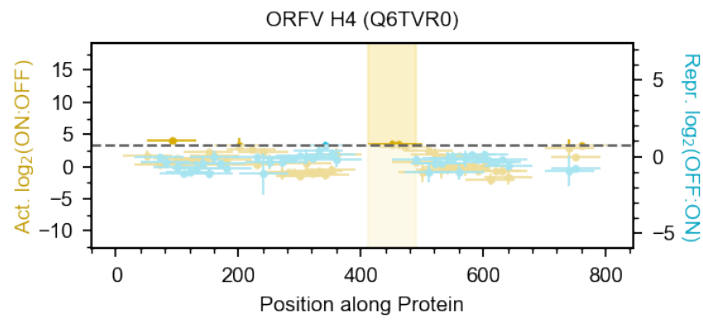

---

Extended activation domain from residues 411 to 500:

NIVMSFDTIMKTQTWAVKYNINRLILNFLIAINARRQEYERRFAAEIKRGVFFLRLSANLLDVHASATELFQSAKTLNLFIVALVIVLN

Max tile of activation domain from residues 411 to 490 (estimated 11.5% to 22.0% of cells activated):

NIVMSFDTIMKTQTWAVKYNINRLILNFLIAINARRQEYERRFAAEIKRGVFFLRLSANLLDVHASATELFQSAKTLNLN

---

HTLV1 HBZ (P0C746)

Gene: HBZ ; Protein Family: HBZ

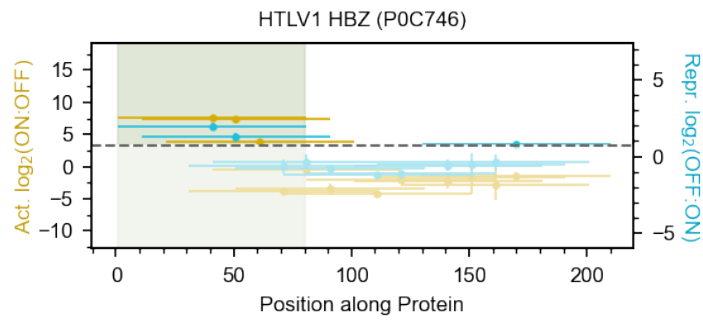

---

Extended activation domain from residues 1 to 100:

MVNFVSAGLFRCLPVSCPEDLLVEELVDGLLSLEEELKDKEEEEAVLDGLLSLEEEESRGRLRRGPPGKAPPRGETHRDRQRRRAEEKRKRKKEREKEEE  
K

Max tile of activation domain from residues 1 to 80 (estimated 78.9% to 80.6% of cells activated):

MVNFVSAGLFRCLPVSCPEDLLVEELVDGLLSLEEELKDKEEEEAVLDGLLSLEEEESRGRLRRGPPGKAPPRGETHRDR

---

Extended repression domain from residues 1 to 90:

MVNFVSAGLFRCLPVSCPEDLLVEELVDGLLSLEEELKDKEEEEAVLDGLLSLEEEESRGRLRRGPPGKAPPRGETHRDRQRRRAEEKRKR

Max tile of repression domain from residues 1 to 80 (estimated 31.3% to 44.1% of cells repressed):

MVNFVSAGLFRCLPVSCPEDLLVEELVDGLLSLEEELKDKEEEEAVLDGLLSLEEEESRGRLRRGPPGKAPPRGETHRDR

---

Other Tiling Screen Data from Ludwig, C.H. et al. 2023

CeHV1 ICP0 (A0A059WI18)

Gene: ICP0 ; Protein Family: ICP0

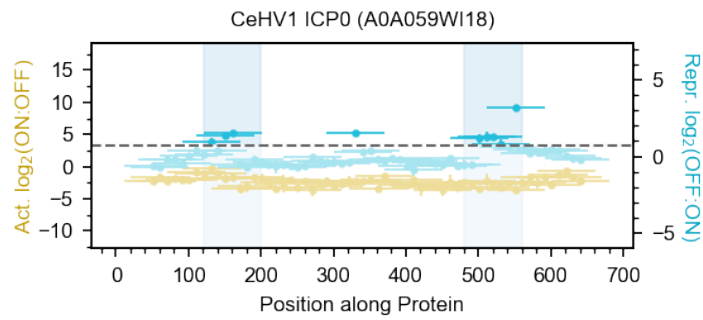

---

Extended repression domain from residues 111 to 200:

LKTWLPMRNSCPLCNAAVAYLIVGVQPNGSYSTIPVVNDPRTRLEAEDAVRAGTAVDFIWVDRPGQPAPPSVTLGGRTVRALSPPARMGR

Max tile of repression domain from residues 121 to 200 (estimated 26.4% to 28.4% of cells repressed):

CPLCNAAVAYLIVGVQPNGSYSTIPVVNDPRTRLEAEDAVRAGTAVDFIWVDRPGQPAPPSVTLGGRTVRALSPPARMGR

---

Extended repression domain from residues 461 to 570:

PHPRPAPARAPALAGAPPPRPLAAPAAPPPQAAPPPAAPPPVERRDRSSLGPRPAEQGPRKCVRKTRHVDAECAPAALGPTRYLPVSGVSSVVALPYLNKTVTGD

Max tile of repression domain from residues 481 to 560 (estimated 22.7% to 25.9% of cells repressed):

RPLAAPAAPPPQAAPPPAAPPPVERRDRSSLGPRPAEQGPRKCVRKTRHVDAECAPAALGPTRYLPVSGVSSVVALA

---

CeHV2 ICP0 (Q5Y0P4)

Gene: RL2 ; Protein Family: ICP0

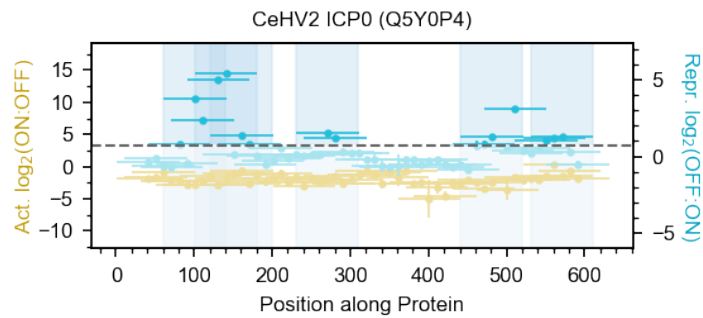

Extended repression domain from residues 91 to 180:

VCTERIDETQLCAAFPC LHRFCIPCLKTWLP MRNSCPLCNAV VAYLIVGVKPDG SYSTIPVINDPR TRAEAEAVRAGTAVDFI WTHRLP

Max tile of repression domain from residues 101 to 180 (estimated 99.9% to 100.1% of cells repressed):

LCAAFPC LHRFCIPCLKTWLP MRNSCPLCNAV VAYLIVGVKPDG SYSTIPVINDPR TRAEAEAVRAGTAVDFI WTHRLP

Extended repression domain from residues 61 to 150:

DTDAELCEPGPASRGPRAPSPPPPREVC AVCTERIDETQLCAAFPC LHRFCIPCLKTWLP MRNSCPLCNAV VAYLIVGVKPDG SYSTIP

Max tile of repression domain from residues 61 to 140 (estimated 85.5% to 90.1% of cells repressed):

DTDAELCEPGPASRGPRAPSPPPPREVC AVCTERIDETQLCAAFPC LHRFCIPCLKTWLP MRNSCPLCNAV VAYLIVGV

Extended repression domain from residues 231 to 320:

DSPILIADSPASP RRPPAVSGPPVAPV APRPRAAMP RPPAQRPPALTQAQAQTQARSQARAQAALAQA LAQALGRAPPRAPPQHAHT

Max tile of repression domain from residues 231 to 310 (estimated 25.7% to 31.3% of cells repressed):

DSPILIADSPASP RRPPAVSGPPVAPV APRPRAAMP RPPAQRPPALTQAQAQTQARSQARAQAALAQA LAQALGRAPP

Extended repression domain from residues 121 to 210:

PMRNSCPLCNAV VAYLIVGVKPDG SYSTIPVINDPR TRAEAEAVRAGTAVDFI WTHRLPGEAAPASVTLGGRTVRALSPPARMGQPAPR

Max tile of repression domain from residues 121 to 200 (estimated 24.8% to 25.1% of cells repressed):

PMRNSCPLCNAV VAYLIVGVKPDG SYSTIPVINDPR TRAEAEAVRAGTAVDFI WTHRLPGEAAPASVTLGGRTVRALS P

Extended repression domain from residues 511 to 610:

SGVSSVAMAPYL NKTVTGDCLPVLDMETGAIGAYVVLVGRDCNLARCLADAEPQWARRSRLPEAAPGCVSPPEYPGDPAHGLWMTVPVGGMLFEQG ALLG

Max tile of repression domain from residues 531 to 610 (estimated 21.7% to 26.4% of cells repressed):

CLPVLDMETGAIGAYVVLVGRDCNLARCLADAEPQWARRSRLPEAAPGCVSPPEYPGDPAHGLWMTVPVGGMLFEQGALLG

Extended repression domain from residues 421 to 520:

PARPAQLPPAPPLAAAAPPAPPPPPASSAPRGSAA PPPAAPPPAERAHGSSLGPRPAERGP RKCARKTHHVDADRAPAASGPTRYLPISGVSSVVA MA

Max tile of repression domain from residues 441 to 520 (estimated 22.0% to 24.9% of cells repressed):

APPPPPASSAPRGSAA PPPAAPPPAERAHGSSLGPRPAERGP RKCARKTHHVDADRAPAASGPTRYLPISGVSSVVA MA

Other Tiling Screen Data from Ludwig, C.H. et al. 2023

SuHV1 ICP4 (G3G929)

Gene: ICP4 ; Protein Family: ICP4

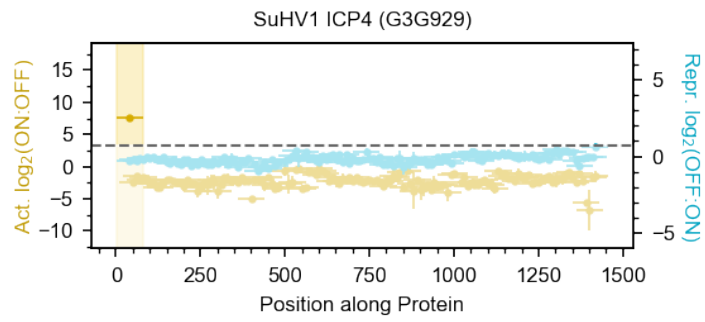

---

Extended activation domain from residues 1 to 80:

MADDLDFIETEGNFSQLLAIAAAAAAEEEGIASGPDGGSQGSRRRGSSGEDLLFGPGGLFSDDAAEAEAAVLAAAAGA

Max tile of activation domain from residues 1 to 80 (estimated 77.7% to 83.1% of cells activated):

MADDLDFIETEGNFSQLLAIAAAAAAEEEGIASGPDGGSQGSRRRGSSGEDLLFGPGGLFSDDAAEAEAAVLAAAAGA

---

Other Tiling Screen Data from Ludwig, C.H. et al. 2023

HHV6B IE1 (Q6XA69)

Gene: U90 ; Protein Family: IE

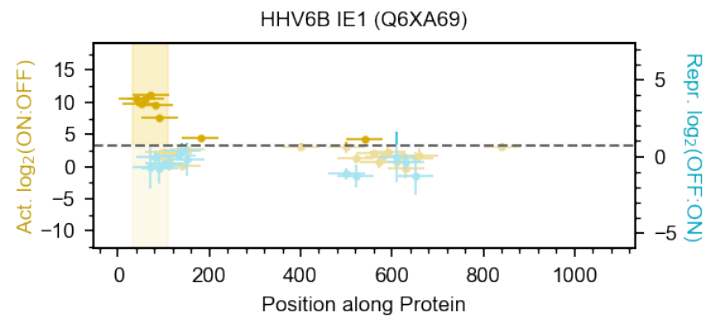

---

Extended activation domain from residues 1 to 130:

MESAKDTTSNSMFI LGKPSGNNMESNEERMQNYHPDPVVEESIKEILEESLKCDVSFESLLFPELEAFDLFIPESNDIASKNVSYSSNVEEGASEEFKAL  
VAQSVGNCIQSIGASVKAAMKQEQSNMED

Max tile of activation domain from residues 31 to 110 (estimated 95.3% to 95.9% of cells activated):

QNYHPDPVVEESIKEILEESLKCDVSFESLLFPELEAFDLFIPESNDIASKNVSYSSNVEEGASEEFKALVAQSVGNCI

---

Other Tiling Screen Data from Ludwig, C.H. et al. 2023

HHV6A IE2 (Q8BB47)

Gene: U90/U86 ; Protein Family: IE

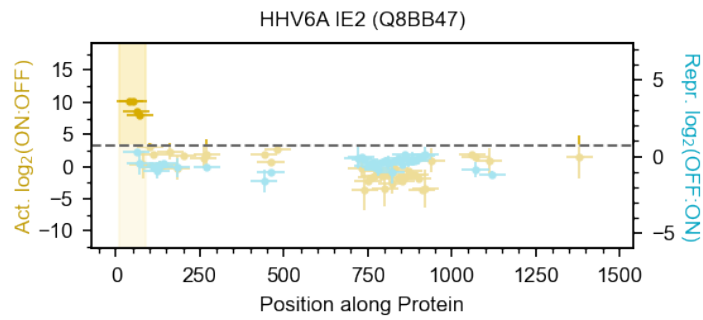

---

Extended activation domain from residues 1 to 110:

MEPAKPSGNNMGSNDERMQDYRPDPMMEEISQQILEDSLDCDTSFDDLILPGLESFGLIPESSNNIESNNVEEGSNEDLKTLEAHEKCKQGNDNDVIQSA  
MKLSGLYCD

Max tile of activation domain from residues 11 to 90 (estimated 94.2% to 94.3% of cells activated):

MGSNDERMQDYRPDPMMEEISQQILEDSLDCDTSFDDLILPGLESFGLIPESSNNIESNNVEEGSNEDLKTLEAHEKCKQ

---



KSHV LANA1 (E5LC01)

Gene: ORF73 ; Protein Family: LANA1

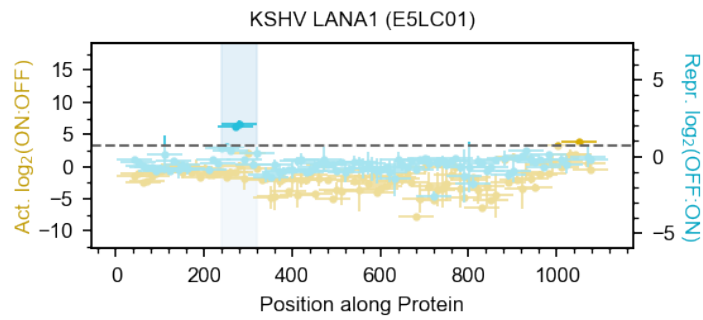

---

Extended repression domain from residues 231 to 320:

NRSVYPPWATESPIYVGSSSDGDTPPRQPPTSPISIGSSSPSEGSWGDDTAMLVLLAEIAEEASKNEKECSENQAGEDNGDNEISKESQ

Max tile of repression domain from residues 241 to 320 (estimated 36.2% to 48.7% of cells repressed):

ESPIYVGSSSDGDTPPRQPPTSPISIGSSSPSEGSWGDDTAMLVLLAEIAEEASKNEKECSENQAGEDNGDNEISKESQ

---

BKPyV LT (P03071)

Gene: LT ; Protein Family: LT

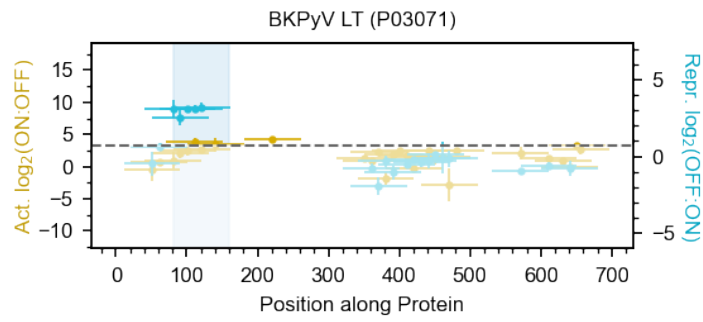

---

Extended repression domain from residues 41 to 160:

FHPDKGGDEDKMKRMNTLYKKMEQDVKVAHQPDFGTWSSSEVPTYGTEEWESWWSSFNEKWDEDLFCHEDMFASDEEATADSQHSSTPPKKKRKVE  
DPKDFPSDLHQFLSQAVFSNRTLAC

Max tile of repression domain from residues 81 to 160 (estimated 68.0% to 83.2% of cells repressed):

EVPTYGTEEWESWWSSFNEKWDEDLFCHEDMFASDEEATADSQHSSTPPKKKRKVEDPKDFPSDLHQFLSQAVFSNRTLAC

---

KIPyV LT (A6YGN7)

Gene: LT ; Protein Family: LT

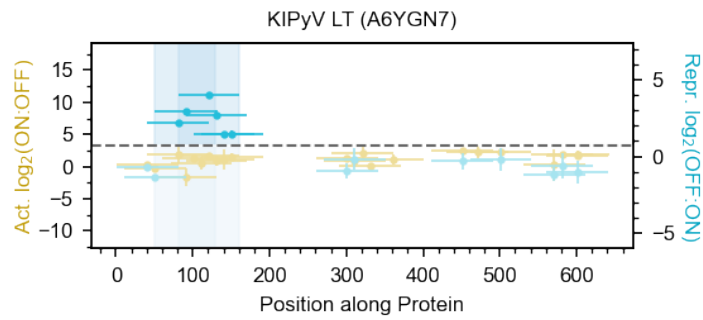

Extended repression domain from residues 81 to 190:

QSSQIPTYGTPDWDEWWSQFNTYWEEELRCNESMPSSPKRSAPEEEEPSCSQATPPKKKHAFDASLEFPKELLEFFVSHAVFSNKCITCFVHTTREKGE  
VLYKKLLQKYQC

Max tile of repression domain from residues 81 to 160 (estimated 90.1% to 93.1% of cells repressed):

QSSQIPTYGTPDWDEWWSQFNTYWEEELRCNESMPSSPKRSAPEEEEPSCSQATPPKKKHAFDASLEFPKELLEFFVSHAVF

Extended repression domain from residues 41 to 130:

YHPDKGGNEESMKLLNSLYLKLQDSVSSVHDLNEEEDNIWQSSQIPTYGTPDWDEWWSQFNTYWEEELRCNESMPSSPKRSAPEEEEPSCS

Max tile of repression domain from residues 51 to 130 (estimated 61.4% to 74.1% of cells repressed):

SMKLLNSLYLKLQDSVSSVHDLNEEEDNIWQSSQIPTYGTPDWDEWWSQFNTYWEEELRCNESMPSSPKRSAPEEEEPSCS

SV40 LT (P03070)

Gene: LT ; Protein Family: LT

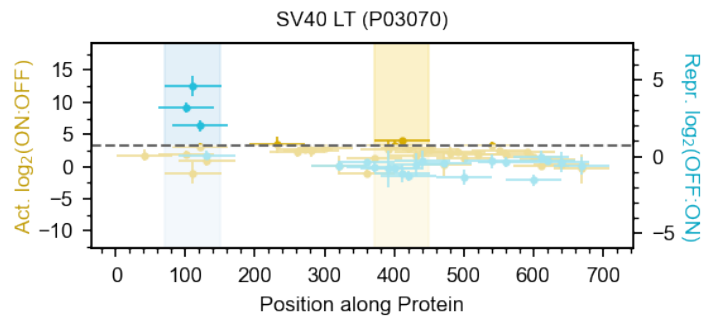

---

Extended activation domain from residues 361 to 450:

LTNRFNDLLDRMDIMFGSTGSADIEEWMAGVAWLHCLLPKMSVVYDFLKCMVYNIPKKRYWLFKGPIDSGKTTLAAALLELCGGKALNV

Max tile of activation domain from residues 371 to 450 (estimated 16.8% to 29.1% of cells activated):

RMDIMFGSTGSADIEEWMAGVAWLHCLLPKMSVVYDFLKCMVYNIPKKRYWLFKGPIDSGKTTLAAALLELCGGKALNV

---

Extended repression domain from residues 61 to 160:

KMEDGVKYAHQPDFGGFWDATEIPTYGTDWEQWWNAFNEENLFCSEEMPSSDDEATADSQHSTPPKKRKRKVEDPKDFSELLSFLSHAVFSNRTLA  
CFA

Max tile of repression domain from residues 71 to 150 (estimated 91.1% to 99.6% of cells repressed):

QPDFGGFWDATEIPTYGTDWEQWWNAFNEENLFCSEEMPSSDDEATADSQHSTPPKKRKRKVEDPKDFSELLSFLSHAV

---

Other Tiling Screen Data from Ludwig, C.H. et al. 2023

WUPyV LT (A5HBG1)

Gene: LT ; Protein Family: LT

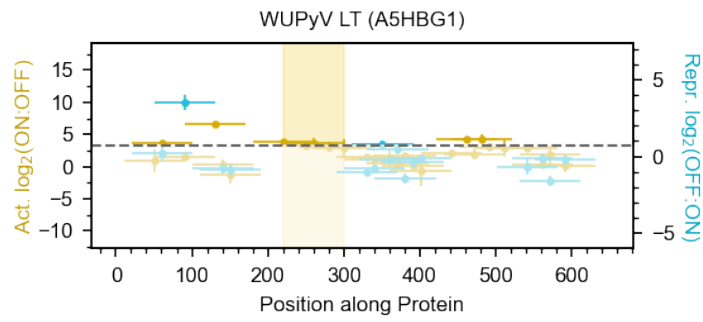

---

Extended activation domain from residues 211 to 300:

LVFILTPFRHRVSAVNNFCKGYCTISFLFCKGVNNAYGLYSRMTRDPFTLCEENIPGGLKENDFKAEDLYGEFKDQLNWKALSEFALELG

Max tile of activation domain from residues 221 to 300 (estimated 11.1% to 28.6% of cells activated):

RVSAVNNFCKGYCTISFLFCKGVNNAYGLYSRMTRDPFTLCEENIPGGLKENDFKAEDLYGEFKDQLNWKALSEFALELG

---

Other Tiling Screen Data from Ludwig, C.H. et al. 2023

HMPV M2-1 (Q6WB97)

Gene: M2-1 ; Protein Family: M2-1

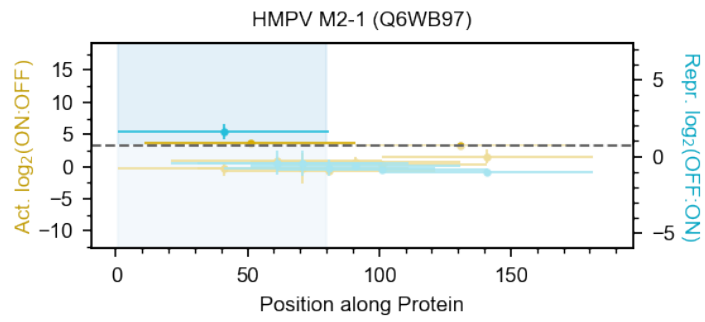

---

Extended repression domain from residues 1 to 80:

MSRKAPCKYEV RGKCNRGSECKFNHNYWSWPD RYLLIRSNYLLNQLLRNTDRADGLSIISGAGREDRTQDFVLGSTNVVQ

Max tile of repression domain from residues 1 to 80 (estimated 21.4% to 40.7% of cells repressed):

MSRKAPCKYEV RGKCNRGSECKFNHNYWSWPD RYLLIRSNYLLNQLLRNTDRADGLSIISGAGREDRTQDFVLGSTNVVQ

---

VACV NPH2 (P12927)

Gene: NPH2 ; Protein Family: NPH2

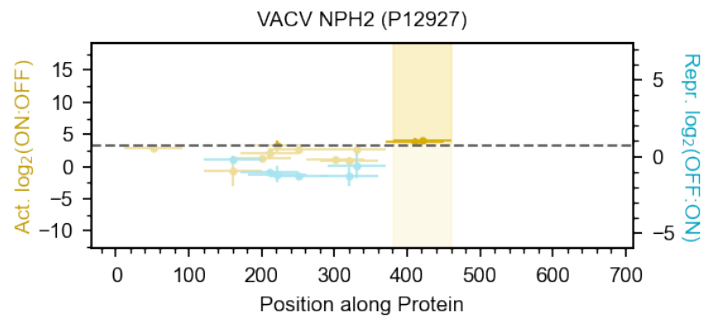

---

Extended activation domain from residues 371 to 460:

MAYIEEEKRNLVTAIQMYTPPDGSSGIVFVASVAQCHEYKSYLEKRLPYDMYIIHGKVL DIDEILEKVYSSPNVSIISTPYLESSVTIR

Max tile of activation domain from residues 381 to 460 (estimated 17.0% to 27.8% of cells activated):

LVTAIQMYTPPDGSSGIVFVASVAQCHEYKSYLEKRLPYDMYIIHGKVL DIDEILEKVYSSPNVSIISTPYLESSVTIR

---

Other Tiling Screen Data from Ludwig, C.H. et al. 2023

B19V NS1 (Q9PZT1)

Gene: NS1 ; Protein Family: NS1

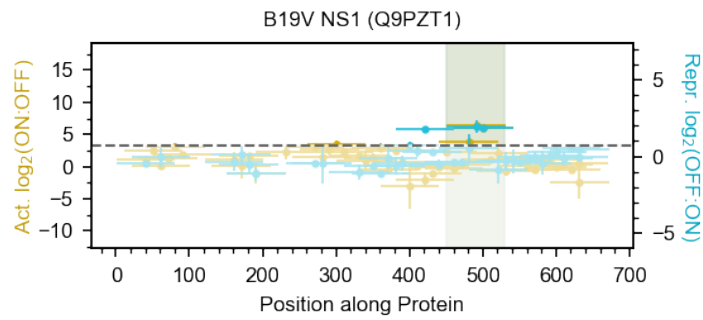

---

Extended activation domain from residues 441 to 540:

KLNFTVRCSPDMGLLTEADVQQWLTWCNAQSWDHYENWAINYTFDFPGINADALHPDLQTTPIVTDTSISSSGGESSEELSESSFFNLITPGAWNTETPR

Max tile of activation domain from residues 451 to 530 (estimated 61.8% to 67.2% of cells activated):

DMGLLTEADVQQWLTWCNAQSWDHYENWAINYTFDFPGINADALHPDLQTTPIVTDTSISSSGGESSEELSESSFFNLIT

---

Extended repression domain from residues 451 to 540:

DMGLLTEADVQQWLTWCNAQSWDHYENWAINYTFDFPGINADALHPDLQTTPIVTDTSISSSGGESSEELSESSFFNLITPGAWNTETPR

Max tile of repression domain from residues 451 to 530 (estimated 27.8% to 49.8% of cells repressed):

DMGLLTEADVQQWLTWCNAQSWDHYENWAINYTFDFPGINADALHPDLQTTPIVTDTSISSSGGESSEELSESSFFNLIT

---



CPV NTPASE1 (Q0NPW0)

Gene: NTPASE1 ; Protein Family: NTPASE1

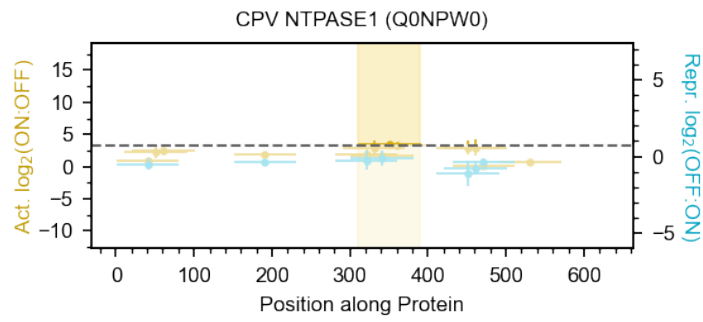

---

Extended activation domain from residues 311 to 400:

EYAQEIATLYNDFKNSLRDREFSKSALDTFKRGELLGGDASAADISLFTTELKEKSVKFIDVCLGILASHGKCLVFEPFVNQSGIEILLLY

Max tile of activation domain from residues 311 to 390 (estimated 13.0% to 19.0% of cells activated):

EYAQEIATLYNDFKNSLRDREFSKSALDTFKRGELLGGDASAADISLFTTELKEKSVKFIDVCLGILASHGKCLVFEPFVN

---

TPV NTPASE1 (A7XCL5)

Gene: NTPASE1 ; Protein Family: NTPASE1

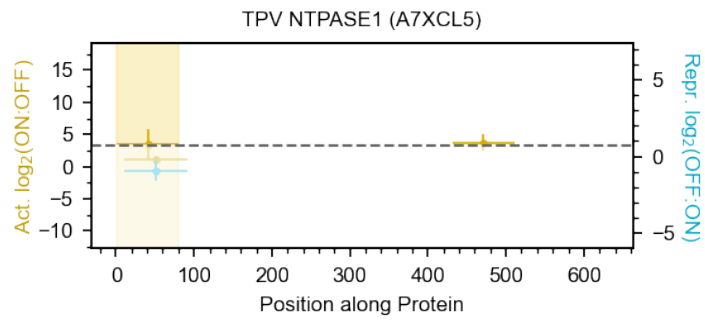

---

Extended activation domain from residues 1 to 80:

MSTQHAAYIDYALNRMESMPIEMLGSDTITLKPYPYQHFVAKVFLGLDTMHSILLFHD TGVGKTITTVFILKHLKDIYTNWT

Max tile of activation domain from residues 1 to 80 (estimated 0.0% to 51.2% of cells activated):

MSTQHAAYIDYALNRMESMPIEMLGSDTITLKPYPYQHFVAKVFLGLDTMHSILLFHD TGVGKTITTVFILKHLKDIYTNWT

---

Other Tiling Screen Data from Ludwig, C.H. et al. 2023

YLDV NTPASE1 (Q9DHM5)

Gene: NTPASE1 ; Protein Family: NTPASE1

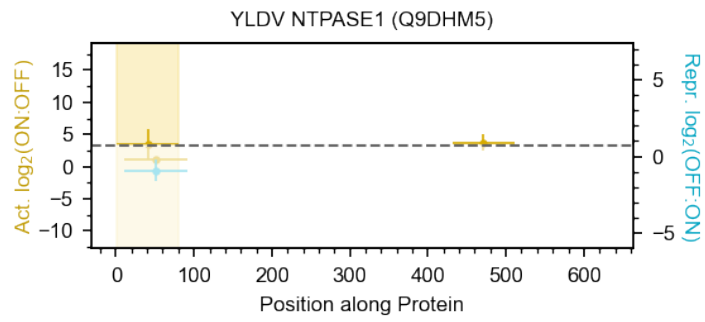

---

Extended activation domain from residues 1 to 80:

MSTQHAAYIDYALNRMESMPIEMLGSDTITLKPYPYQHFVAKVFLGLDTMHSILLFHDTGVGKTITTVFILKHLKDIYTNWT

Max tile of activation domain from residues 1 to 80 (estimated 0.0% to 51.2% of cells activated):

MSTQHAAYIDYALNRMESMPIEMLGSDTITLKPYPYQHFVAKVFLGLDTMHSILLFHDTGVGKTITTVFILKHLKDIYTNWT

---

CPV NTPASE2 (G0XU00)

Gene: NTPASE2 ; Protein Family: NTPASE2

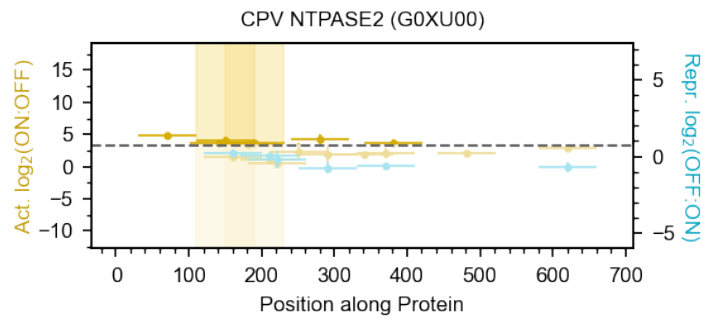

---

Extended activation domain from residues 101 to 190:

ECYSFLKCITNTEINSFDDYILRGLLEAGNSLQIFSNSVGRKRTDTVGLGNKYPFKIPLASLTPKAQREIFSAWISHRPVLTGGTGVG

Max tile of activation domain from residues 111 to 190 (estimated 16.9% to 31.8% of cells activated):

NTEINSFDDYILRGLLEAGNSLQIFSNSVGRKRTDTVGLGNKYPFKIPLASLTPKAQREIFSAWISHRPVLTGGTGVG

---

Extended activation domain from residues 141 to 230:

KRTDTVGLGNKYPFKIPLASLTPKAQREIFSAWISHRPVLTGGTGVGKTSQVPKLLWFNYLFGGFSTLKITDFHERPVILSLPRI

Max tile of activation domain from residues 151 to 230 (estimated 12.7% to 25.2% of cells activated):

NKYPFKIPLASLTPKAQREIFSAWISHRPVLTGGTGVGKTSQVPKLLWFNYLFGGFSTLKITDFHERPVILSLPRI

---

Other Tiling Screen Data from Ludwig, C.H. et al. 2023

MPXV NTPASE2 (Q3I8U5)

Gene: NTPASE2 ; Protein Family: NTPASE2

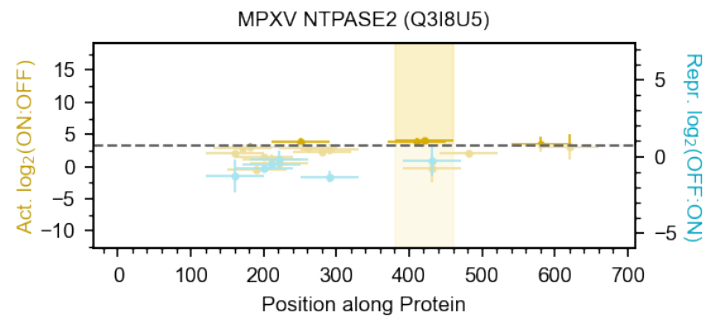

---

Extended activation domain from residues 371 to 460:

MAYIEEEKRNLVTAIQMYTPPDGSSGIVFVASVAQCHEYKSYLEKRLPYDMYIIHGKVL DIDEILEKVYSSPNVSIISTPYLESSVTIR

Max tile of activation domain from residues 381 to 460 (estimated 17.0% to 27.8% of cells activated):

LVTAIQMYTPPDGSSGIVFVASVAQCHEYKSYLEKRLPYDMYIIHGKVL DIDEILEKVYSSPNVSIISTPYLESSVTIR

---

Other Tiling Screen Data from Ludwig, C.H. et al. 2023

LCMV N (P07400)

Gene: N ; Protein Family: N

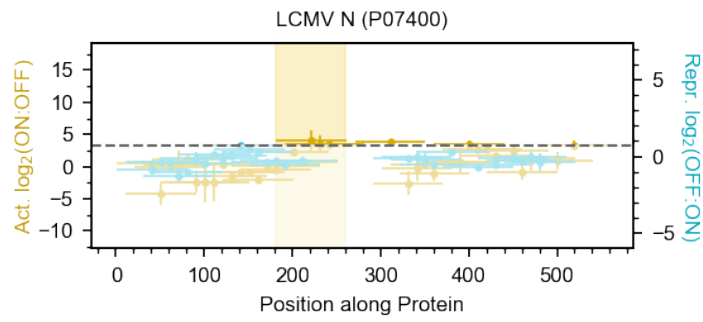

---

Extended activation domain from residues 181 to 280:

ACMAKQSQTPLNDVVQALTDLGLLYTVKYPNLSDLERLKDHPVLGVITEQQSSINISGYNFSLGAAVKAGAALLHGGNMLESILIKPSNSEDLLKAVLG

Max tile of activation domain from residues 181 to 260 (estimated 7.6% to 48.8% of cells activated):

ACMAKQSQTPLNDVVQALTDLGLLYTVKYPNLSDLERLKDHPVLGVITEQQSSINISGYNFSLGAAVKAGAALLHGGNM

---

BPSV ORF069 (Q6TVB9)

Gene: ORF069 ; Protein Family: ORF069

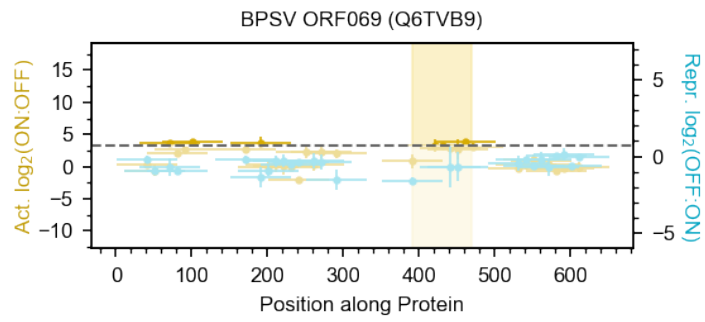

---

Extended activation domain from residues 381 to 470:

SEYNGSHSNNPHTIDGRPCTFAIVTSKMKASLEELLEAYNSPENDDGSRLMFLFSSNIMSESYTLKEVRNIWFMTIPDTFSQFNQILGRA

Max tile of activation domain from residues 391 to 470 (estimated 11.8% to 17.5% of cells activated):

PHTIDGRPCTFAIVTSKMKASLEELLEAYNSPENDDGSRLMFLFSSNIMSESYTLKEVRNIWFMTIPDTFSQFNQILGRA

---

ORFV ORF069 (Q6TVQ1)

Gene: ORF069 ; Protein Family: ORF069

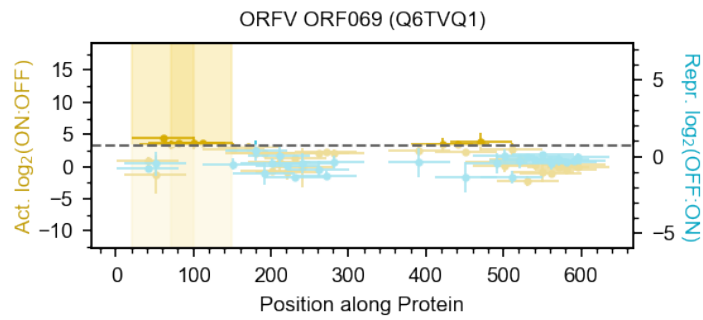

---

Extended activation domain from residues 21 to 120:

PHQLATVDFLIRRVLDDNVSVLLFHIMGSGKTVIALLFAMVASRTKKVYILVPNVNVMNIFNYSMVMVANLNFAPFVAENIFVYSTTSFYSLNCNDGVVN

Max tile of activation domain from residues 21 to 100 (estimated 21.5% to 33.2% of cells activated):

PHQLATVDFLIRRVLDDNVSVLLFHIMGSGKTVIALLFAMVASRTKKVYILVPNVNVMNIFNYSMVMVANLNFAPFVAEN

---

Extended activation domain from residues 61 to 150:

VASRTKKVYILVPNVNVMNIFNYSMVMVANLNFAPFVAENIFVYSTTSFYSLNCNDGVVNYNGLSKYENSFVVDVAHNIFGNNTGELMM

Max tile of activation domain from residues 71 to 150 (estimated 18.0% to 19.0% of cells activated):

LVPNVNVMNIFNYSMVMVANLNFAPFVAENIFVYSTTSFYSLNCNDGVVNYNGLSKYENSFVVDVAHNIFGNNTGELMM

---



KSHV ORF52 (F5HBL8)

Gene: ORF52 ; Protein Family: ORF52

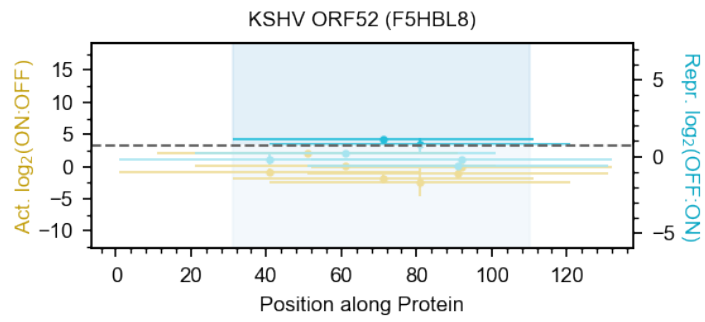

---

Extended repression domain from residues 31 to 120:

LRKALGSTADPRDRPLTATEKEAQLTATVGALSAAAAKKIEARVRTIFSKVVTQKQVDDALKGLSLRIDVCMSDGGTAKPPPGANNRRRR

Max tile of repression domain from residues 31 to 110 (estimated 21.5% to 21.7% of cells repressed):

LRKALGSTADPRDRPLTATEKEAQLTATVGALSAAAAKKIEARVRTIFSKVVTQKQVDDALKGLSLRIDVCMSDGGTAKP

---

HCV POLY (P27958)

Gene: POLY ; Protein Family: POLY

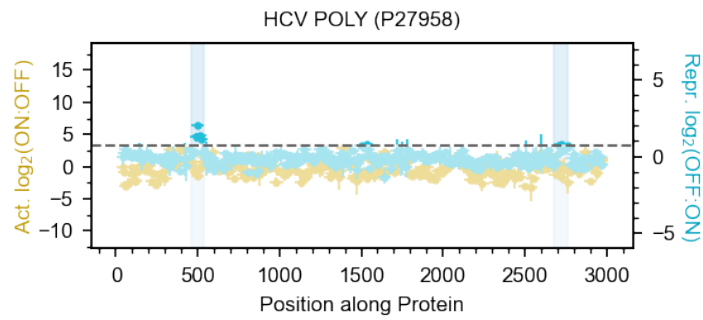

---

Extended repression domain from residues 451 to 560:

GCPERLASCRRRLDFAQGWGPISYANGSGLDERPYCWHYPPRPCGIVPAKSVCGPVYCFTPSPVVVGGTTDRSGAPTYSWGANDTDVFLNNTRPPLG  
NWFGCTWMNSTGF

Max tile of repression domain from residues 461 to 540 (estimated 35.7% to 41.1% of cells repressed):

RLDFAQGWGPISYANGSGLDERPYCWHYPPRPCGIVPAKSVCGPVYCFTPSPVVVGGTTDRSGAPTYSWGANDTDVFLN

---

Extended repression domain from residues 2671 to 2760:

VAIKSLTERLYVGGPLTNSRGENCGYRRCRASRVLTSCGNTLTRYIKARAACRAAGLQDCTMLVCGDDLVVICESAGVQEDAASLRAFT

Max tile of repression domain from residues 2681 to 2760 (estimated 17.9% to 20.2% of cells repressed):

YVGGPLTNSRGENCGYRRCRASRVLTSCGNTLTRYIKARAACRAAGLQDCTMLVCGDDLVVICESAGVQEDAASLRAFT

---

BDV P (P0C799)

Gene: P ; Protein Family: P

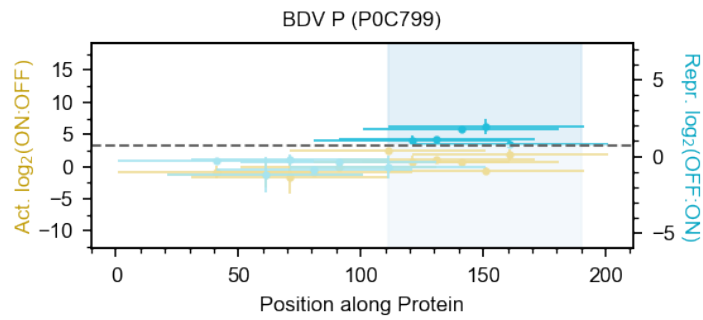

---

Extended repression domain from residues 81 to 200:

ELAENSMIEAEEVRGTLGDISARIEAGFESLSALQVETIQTAQRCDHSDSIRILGENIKILDRSMKTMETMKLMMKVDLLYASTAVGTSAPMLPSPAPP  
RIYPQLPSAPTTDEWDII

Max tile of repression domain from residues 111 to 190 (estimated 26.6% to 50.7% of cells repressed):

LSALQVETIQTAQRCDHSDSIRILGENIKILDRSMKTMETMKLMMKVDLLYASTAVGTSAPMLPSPAPPRIYPQLPS

---

Other Tiling Screen Data from Ludwig, C.H. et al. 2023

BoDV2 P (Q9Q9U9)

Gene: P ; Protein Family: P

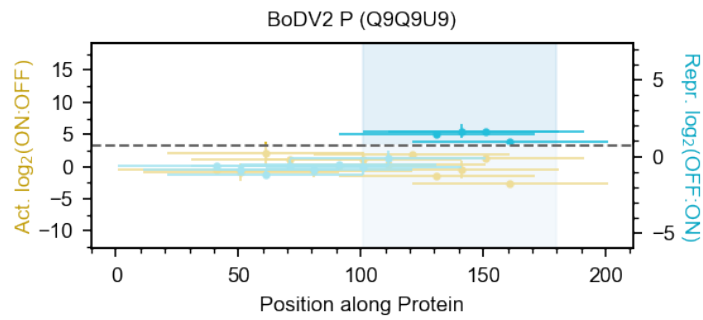

---

Extended repression domain from residues 91 to 200:

EEVRGTLGDISARLEAGFESLSALQVETIQTAQRCDHSDSIRVLGENIKILDRSMKTMETMKLMEKVDLLYASTAVGTSAPMLPSHPAPPRIYQLPSA  
PTADEWDII

Max tile of repression domain from residues 101 to 180 (estimated 22.4% to 41.6% of cells repressed):

SARLEAGFESLSALQVETIQTAQRCDHSDSIRVLGENIKILDRSMKTMETMKLMEKVDLLYASTAVGTSAPMLPSHPA

---

Other Tiling Screen Data from Ludwig, C.H. et al. 2023

HPIV2 P (P23056)

Gene: P ; Protein Family: P

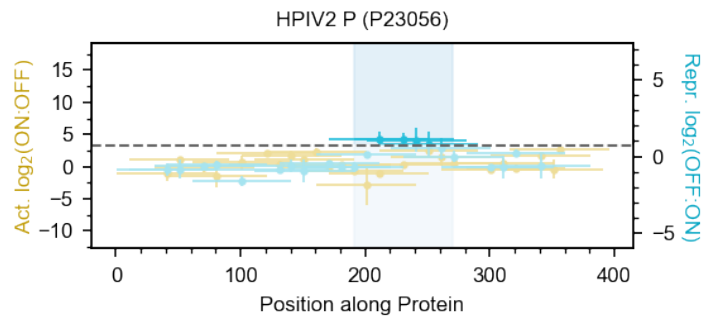

---

Extended repression domain from residues 191 to 290:

SSGVIPGVPQSRPQLASSPAHADPAPASAENVKEIIELLKGLDLRLQTVEGKVDKILATSATIINLKNEMTSLKASVATMEGMITTIKIMDPSTPTNVPV

Max tile of repression domain from residues 191 to 270 (estimated 18.4% to 27.1% of cells repressed):

SSGVIPGVPQSRPQLASSPAHADPAPASAENVKEIIELLKGLDLRLQTVEGKVDKILATSATIINLKNEMTSLKASVATM

---

Other Tiling Screen Data from Ludwig, C.H. et al. 2023

HPIV4b P (P21738)

Gene: P ; Protein Family: P

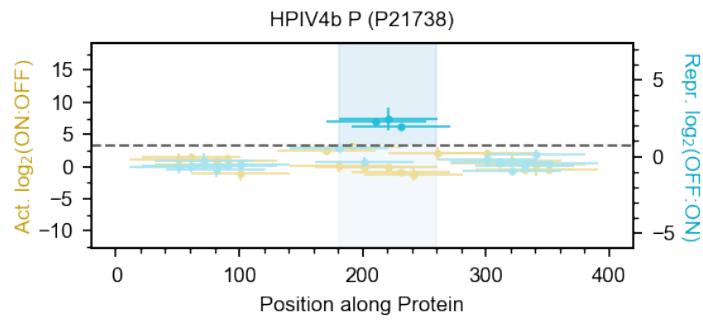

---

Extended repression domain from residues 171 to 270:

KIQSSFQDIEESTRFHGSMEEPQYQSGAIHVAHQSNQLPPSKNVHVEDVDPKFANYALEILDAIKALEVRLDRIEGKVDKIMLTQNTIQQTKNNDTQQIKGS

Max tile of repression domain from residues 181 to 260 (estimated 31.6% to 76.2% of cells repressed):

ESTRFHGSMEEPQYQSGAIHVAHQSNQLPPSKNVHVEDVDPKFANYALEILDAIKALEVRLDRIEGKVDKIMLTQNTIQQT

---

Other Tiling Screen Data from Ludwig, C.H. et al. 2023

HRSVA2 P (P03421)

Gene: P ; Protein Family: P

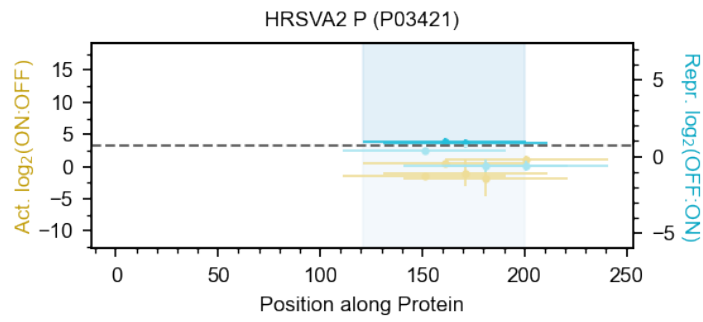

---

Extended repression domain from residues 121 to 210:

EEINDQTNDNITARLDRIDEKLSEILGMLHTLVVASAGPTSARDGIRDAMIGLREEMIEKIRTEALMTNDRLEAMARLRNEESEKMAKDT

Max tile of repression domain from residues 121 to 200 (estimated 17.6% to 23.1% of cells repressed):

EEINDQTNDNITARLDRIDEKLSEILGMLHTLVVASAGPTSARDGIRDAMIGLREEMIEKIRTEALMTNDRLEAMARLRN

---

Other Tiling Screen Data from Ludwig, C.H. et al. 2023

MeV P (P35974)

Gene: P ; Protein Family: P

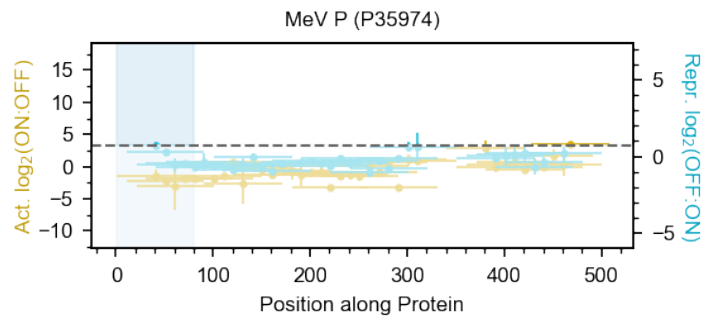

---

Extended repression domain from residues 1 to 80:

MAEEQARHVKNGLECI RALKAEP IGLAIEEAMAAWSEISDNPGQERATCREEKAGSSGLSKPCLSAIGSTEGGAPRIRG

Max tile of repression domain from residues 1 to 80 (estimated 17.2% to 19.7% of cells repressed):

MAEEQARHVKNGLECI RALKAEP IGLAIEEAMAAWSEISDNPGQERATCREEKAGSSGLSKPCLSAIGSTEGGAPRIRG

---



Other Tiling Screen Data from Ludwig, C.H. et al. 2023

HDV S-HDAg (P0C6L3)

Gene: S-HDAg ; Protein Family: S-HDAg

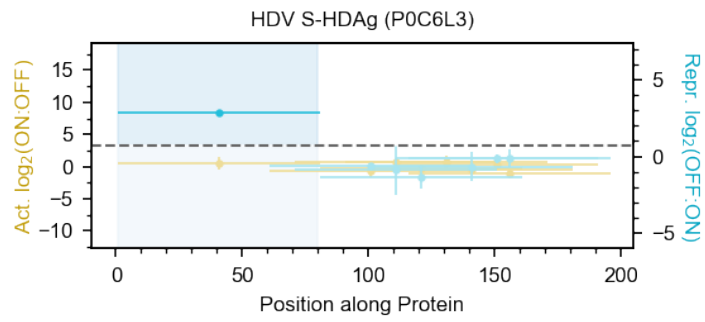

---

Extended repression domain from residues 1 to 80:

MSRPEGRKNRGGREEVLEQWVSGRKKLEELERDLRKVKKKIKKLEDEHPWLGNIKGILGKKDKDGEGAPPAKRARTDQME

Max tile of repression domain from residues 1 to 80 (estimated 56.1% to 71.8% of cells repressed):

MSRPEGRKNRGGREEVLEQWVSGRKKLEELERDLRKVKKKIKKLEDEHPWLGNIKGILGKKDKDGEGAPPAKRARTDQME

---

Other Tiling Screen Data from Ludwig, C.H. et al. 2023

HHV6B UL79 (P52548)

Gene: U52 ; Protein Family: UL79

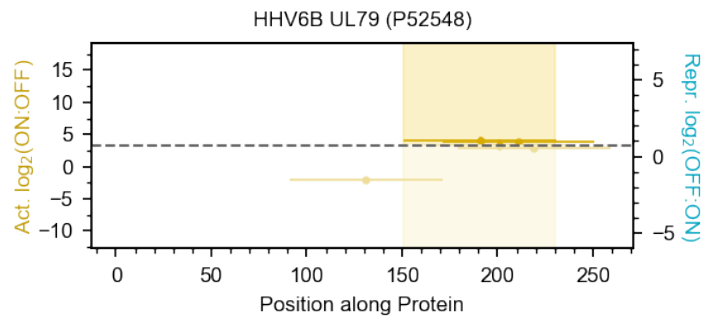

---

Extended activation domain from residues 151 to 250:

FSVGAIYNHRLKICRFFNRFWGDQEREPAVRLICKHLWFAYLIMFGKFEISTLAYNQRAEHKAGLFSFLQNDKFVFCGMSENPQLLDSSAIFDLTGIS

Max tile of activation domain from residues 151 to 230 (estimated 18.8% to 30.2% of cells activated):

FSVGAIYNHRLKICRFFNRFWGDQEREPAVRLICKHLWFAYLIMFGKFEISTLAYNQRAEHKAGLFSFLQNDKFVFCG

---

HCMV UL84 (P29839)

Gene: UL84 ; Protein Family: UL84

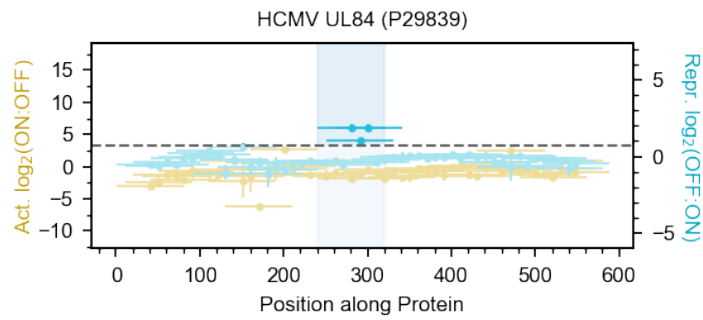

---

Extended repression domain from residues 241 to 340:

PPLKRVPLRRKAAHHTALHDCMALHLPELTFESTLDINNV TENAASVADAAESTDADLTPTLTVRVRHAVCWHRVEGGISGPRGLTSRISARLSETTAKT

Max tile of repression domain from residues 241 to 320 (estimated 30.7% to 40.9% of cells repressed):

PPLKRVPLRRKAAHHTALHDCMALHLPELTFESTLDINNV TENAASVADAAESTDADLTPTLTVRVRHAVCWHRVEGGIS

---

EBV UL92 (P0CK56)

Gene: BDLF4 ; Protein Family: UL92

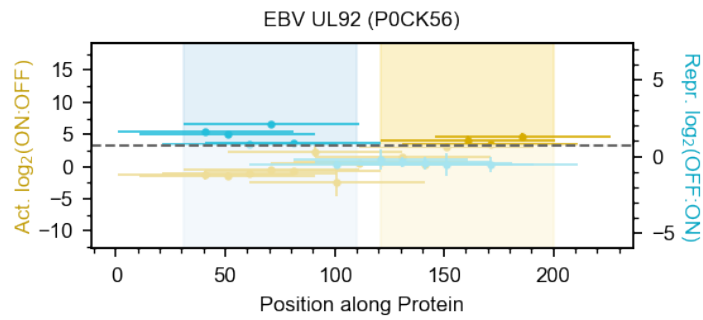

---

Extended activation domain from residues 121 to 210:

YHYFLNENVISGVSEALFDQEGALRPHIPALVSFVFPCLMLFRGASSEKVVDDVLSLYIHVIISIYSQKTVYGALLFKSTRNKRYDAVA

Max tile of activation domain from residues 121 to 200 (estimated 15.1% to 35.6% of cells activated):

YHYFLNENVISGVSEALFDQEGALRPHIPALVSFVFPCLMLFRGASSEKVVDDVLSLYIHVIISIYSQKTVYGALLFKS

---

Extended repression domain from residues 1 to 120:

MSDQGRLSLPRGEGGTDEPNRHLCSYSKLEFHLPLPESMASVFACWGCGEYHVCDGSSECTLIETHEGVVCALTGNMGPHFQPALRPWTEIRQDT  
QDQRDKWEPEVQGLVKTVVNHL

Max tile of repression domain from residues 31 to 110 (estimated 39.1% to 42.9% of cells repressed):

EFHLPLPESMASVFACWGCGEYHVCDGSSECTLIETHEGVVCALTGNMGPHFQPALRPWTEIRQDTQDQRDKWEPEVQVQ

---

CPV VETFL (Q0NPV0)

Gene: VETFL ; Protein Family: VETFL

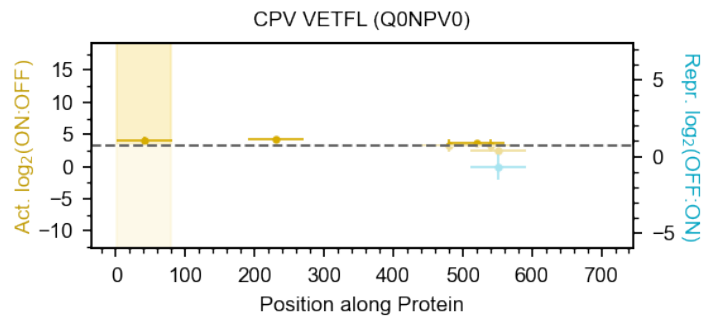

---

Extended activation domain from residues 1 to 80:

MRYIVSPQLVLQVGKGQEVERALYLTPYDYIDEKSPIYYFLRSHLNIQQPEIVKRHILLTLRMTQLKGYLGNLLDIKDDI

Max tile of activation domain from residues 1 to 80 (estimated 14.3% to 30.9% of cells activated):

MRYIVSPQLVLQVGKGQEVERALYLTPYDYIDEKSPIYYFLRSHLNIQQPEIVKRHILLTLRMTQLKGYLGNLLDIKDDI

---

ORFV VETFL (Q6TVN7)

Gene: VETFL ; Protein Family: VETFL

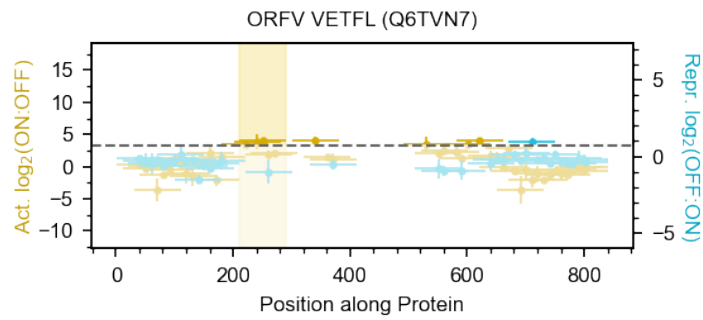

---

Extended activation domain from residues 201 to 290:

KGYLGSLLGLQDEIIVYSHKNNLEYSYVDNTIFNPFSPQTQKTLIRTDGILYNAYADACNFLVWVARAADTSAPEFGSFEEPND SILKF

Max tile of activation domain from residues 211 to 290 (estimated 19.1% to 27.7% of cells activated):

QDEIIVYSHKNNLEYSYVDNTIFNPFSPQTQKTLIRTDGILYNAYADACNFLVWVARAADTSAPEFGSFEEPND SILKF

---

Other Tiling Screen Data from Ludwig, C.H. et al. 2023

VACV VETFL (A9J0Q5)

Gene: VETFL ; Protein Family: VETFL

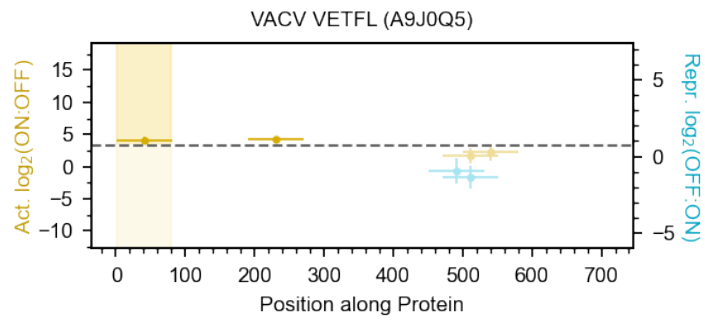

---

Extended activation domain from residues 1 to 80:

MRYIVSPQLVLQVGKGQEVERALYLTPYDYIDEKSPIYYFLRSHLNIQQPEIVKRHILLTLRMTQLKGYLGNLLDIKDDI

Max tile of activation domain from residues 1 to 80 (estimated 14.3% to 30.9% of cells activated):

MRYIVSPQLVLQVGKGQEVERALYLTPYDYIDEKSPIYYFLRSHLNIQQPEIVKRHILLTLRMTQLKGYLGNLLDIKDDI

---

CPV VETFS (Q76QJ5)

Gene: VETFS ; Protein Family: VETFS

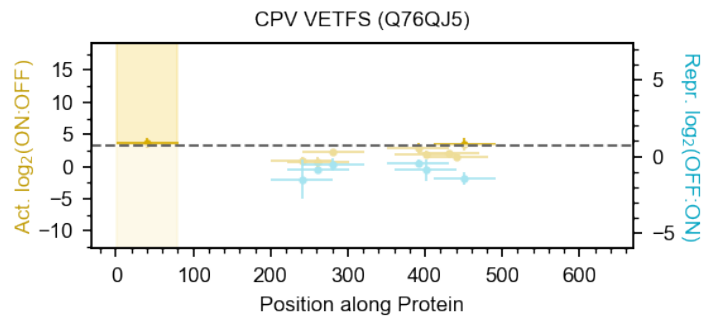

---

Extended activation domain from residues 1 to 80:

MNTGIIDLFDNHVDSIPTILPHQLATLDYLVRTIIDENRSVLLFHIMGSGKTIALLFALVASRFKKVYILVPNINILKI

Max tile of activation domain from residues 1 to 80 (estimated 11.3% to 28.1% of cells activated):

MNTGIIDLFDNHVDSIPTILPHQLATLDYLVRTIIDENRSVLLFHIMGSGKTIALLFALVASRFKKVYILVPNINILKI

---



MPXV VETFS (Q5IXS2)

Gene: VETFS ; Protein Family: VETFS

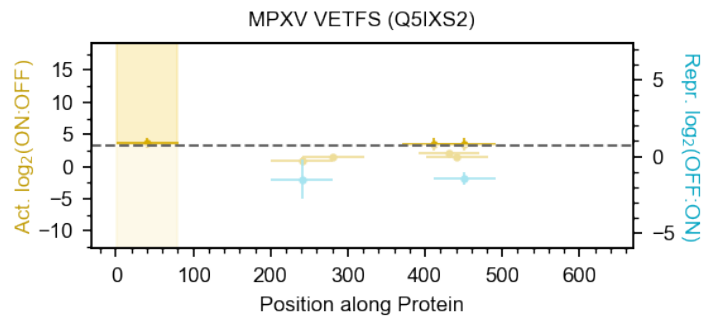

---

Extended activation domain from residues 1 to 80:

MNTGIIDLFDNHVDSIPTILPHQLATLDYLVRTIIDENRSVLLFHIMGSGKTIALLFALVASRFKKVYILVPNINILKI

Max tile of activation domain from residues 1 to 80 (estimated 11.3% to 28.1% of cells activated):

MNTGIIDLFDNHVDSIPTILPHQLATLDYLVRTIIDENRSVLLFHIMGSGKTIALLFALVASRFKKVYILVPNINILKI

---

PCPV VETFS (D3IZL6)

Gene: VETFS ; Protein Family: VETFS

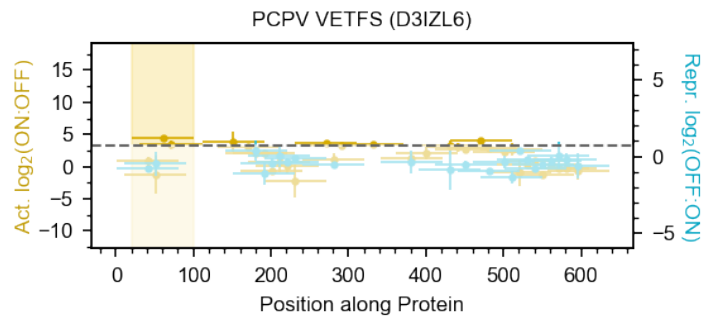

---

Extended activation domain from residues 21 to 110:

PHQLATVDFLIRRVLDDNVSVLLFHIMGSGKTVIALLFAMVASRTKKVYILVPNVNVMNIFNYSMVMVANLNFAPFVAENIFVYSTTSFY

Max tile of activation domain from residues 21 to 100 (estimated 21.5% to 33.2% of cells activated):

PHQLATVDFLIRRVLDDNVSVLLFHIMGSGKTVIALLFAMVASRTKKVYILVPNVNVMNIFNYSMVMVANLNFAPFVAEN

---

Other Tiling Screen Data from Ludwig, C.H. et al. 2023

VACV VETFS (P04308)

Gene: VETFS ; Protein Family: VETFS

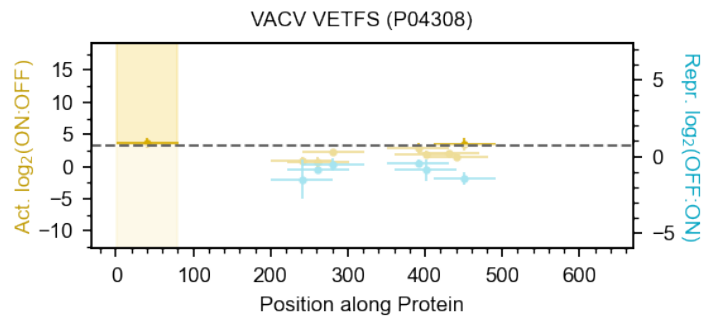

---

Extended activation domain from residues 1 to 80:

MNTGIIDLFDNHVDSIPTILPHQLATLDYLVRTIIDENRSVLLFHIMGSGKTIIALLFALVASRFKKVYILVPNINILKI

Max tile of activation domain from residues 1 to 80 (estimated 11.3% to 28.1% of cells activated):

MNTGIIDLFDNHVDSIPTILPHQLATLDYLVRTIIDENRSVLLFHIMGSGKTIIALLFALVASRFKKVYILVPNINILKI

---

KSHV VIRF3 (Q9DUN1)

Gene: K10.5 ; Protein Family: VIRF

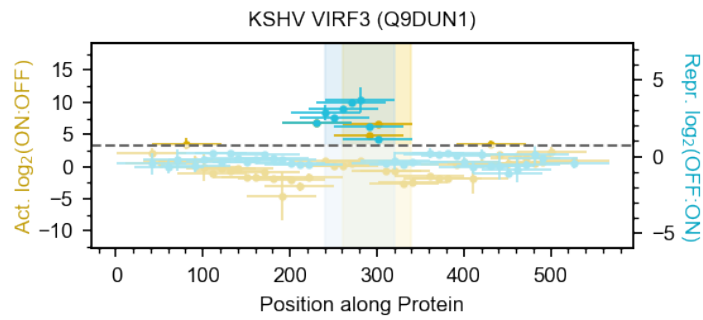

---

Extended activation domain from residues 251 to 340:

CALMYHVGQEMDMLMRAMCDEDLFDLLGIPEDVIATSQPGGTDASGVVTEGSAASAVGAGVEDVYLAGALEAQN VAGEYVLEISDEEV

Max tile of activation domain from residues 261 to 340 (estimated 66.7% to 67.9% of cells activated):

MDMLMRAMCDEDLFDLLGIPEDVIATSQPGGTDASGVVTEGSAASAVGAGVEDVYLAGALEAQN VAGEYVLEISDEEV

---

Extended repression domain from residues 191 to 340:

TRHSASGVQPVDANADSPGSGDEGPSTRHSDSQPPPADETTVHTDNVEDDLTLLDKESACALMYHVGQEMDMLMRAMCDEDLFDLLGIPEDVIATSQPGGTDASGVVTEGSAASAVGAGVEDVYLAGALEAQN VAGEYVLEISDEEV

Max tile of repression domain from residues 241 to 320 (estimated 66.6% to 96.9% of cells repressed):

DLTLLDKESACALMYHVGQEMDMLMRAMCDEDLFDLLGIPEDVIATSQPGGTDASGVVTEGSAASAVGAGVEDVYLAG

---

YMTV VITF3L (Q6TUQ4)

Gene: VITF3L ; Protein Family: VITF3L

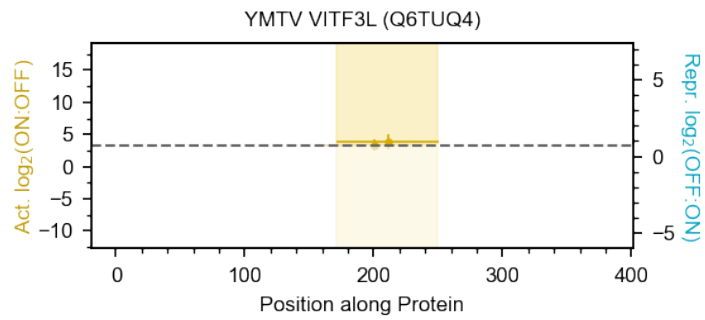

---

Extended activation domain from residues 161 to 250:

YMSTTVRYDNTNPWIKSVSKRMRVDIVNNAITKGKSSILQTIEIVFLNRTC VKIFKDSTMHIILSKERRELGCVGLIDKLFSVYKILFL

Max tile of activation domain from residues 171 to 250 (estimated 9.0% to 37.0% of cells activated):

TNPWIKSVSKRMRVDIVNNAITKGKSSILQTIEIVFLNRTC VKIFKDSTMHIILSKERRELGCVGLIDKLFSVYKILFL

---

CPV VLTF1 (Q76QK3)

Gene: VLTF1 ; Protein Family: VLTF1

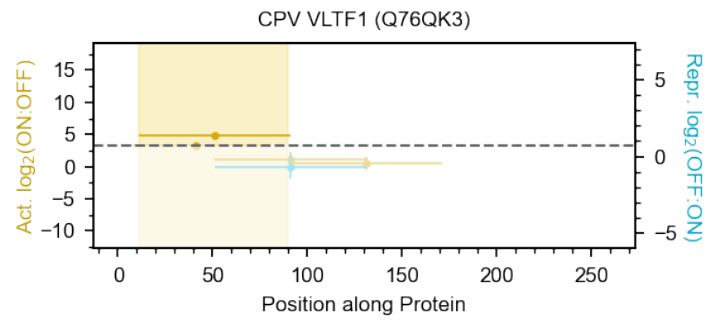

---

Extended activation domain from residues 1 to 90:

MSIRIKIDKLRQIVAYFSEFSEEVSINVDSTDELMYIFAALGGSVNIWAIPLSASVFYRGAENIVFNLPVSKVKSCLCFSFHNDIIDIE

Max tile of activation domain from residues 11 to 90 (estimated 32.2% to 39.3% of cells activated):

RQIVAYFSEFSEEVSINVDSTDELMYIFAALGGSVNIWAIPLSASVFYRGAENIVFNLPVSKVKSCLCFSFHNDIIDIE

---

MPXV VLTF1 (Q5IXU7)

Gene: VLTF1 ; Protein Family: VLTF1

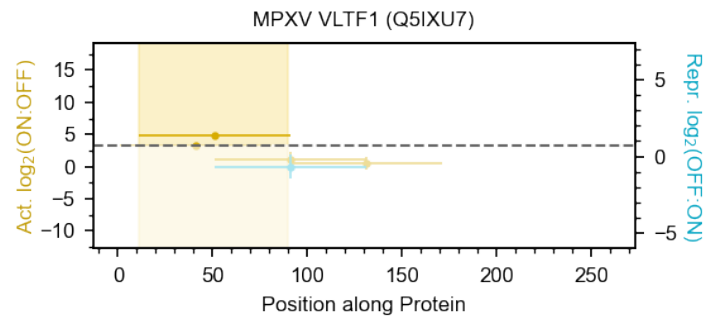

---

Extended activation domain from residues 1 to 90:

MSIRIKIDKLRQIVAYFSEFSEEVSINVDSTDELMYIFAALGGSVNIWAIPLSASVFYRGAENIVFNLPVSKVKSCLCFSFHNDIIDIE

Max tile of activation domain from residues 11 to 90 (estimated 32.2% to 39.3% of cells activated):

RQIVAYFSEFSEEVSINVDSTDELMYIFAALGGSVNIWAIPLSASVFYRGAENIVFNLPVSKVKSCLCFSFHNDIIDIE

---

ORFV VLTF1 (Q6TVS5)

Gene: VLTF1 ; Protein Family: VLTF1

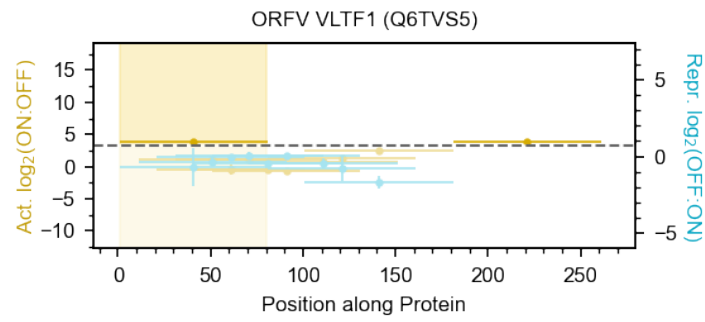

---

Extended activation domain from residues 1 to 80:

MTLRIKLEKLEKQIVTYFSEFSEEVSNNVDVGDGLMYIFAALGGSVNIWTIVPLSASVVYDGDVSRVFNLPVLKVKACLCS

Max tile of activation domain from residues 1 to 80 (estimated 16.2% to 24.1% of cells activated):

MTLRIKLEKLEKQIVTYFSEFSEEVSNNVDVGDGLMYIFAALGGSVNIWTIVPLSASVVYDGDVSRVFNLPVLKVKACLCS

---



Other Tiling Screen Data from Ludwig, C.H. et al. 2023

VACV VLTF1 (P68613)

Gene: VLTF1 ; Protein Family: VLTF1

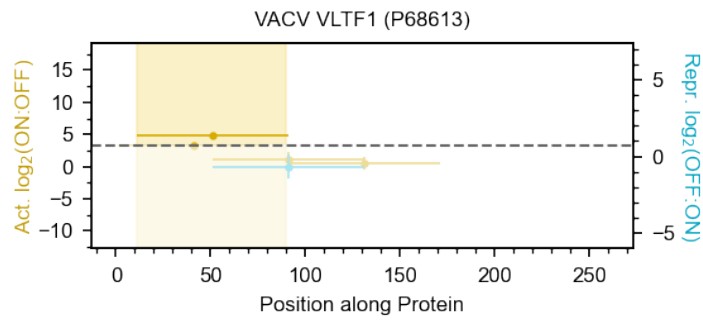

---

Extended activation domain from residues 1 to 90:

MSIRIKIDKLRQIVAYFSEFSEEVSINVDSTDELMYIFAALGGSVNIWAIPLSASVFYRGAENIVFNLPVSKVKSCLCFSFHNDIIDIE

Max tile of activation domain from residues 11 to 90 (estimated 32.2% to 39.3% of cells activated):

RQIVAYFSEFSEEVSINVDSTDELMYIFAALGGSVNIWAIPLSASVFYRGAENIVFNLPVSKVKSCLCFSFHNDIIDIE

---

Other Tiling Screen Data from Ludwig, C.H. et al. 2023

YMTV VLTF1 (Q6TUV5)

Gene: VLTF1 ; Protein Family: VLTF1

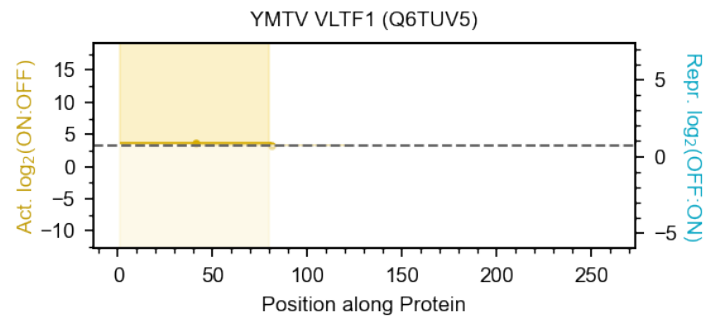

---

Extended activation domain from residues 1 to 80:

MSLRIDKIDKLRQIVAYFSEFSEEVSINVDASSNIMYIFAALGGSVNIWAMVPLSSSVFYEGENNKVFNLVPVSKVKSCCLCS

Max tile of activation domain from residues 1 to 80 (estimated 17.0% to 20.2% of cells activated):

MSLRIDKIDKLRQIVAYFSEFSEEVSINVDASSNIMYIFAALGGSVNIWAMVPLSSSVFYEGENNKVFNLVPVSKVKSCCLCS

---

BPSV VLTF4 (Q6TVC7)

Gene: VLTF4 ; Protein Family: VLTF4

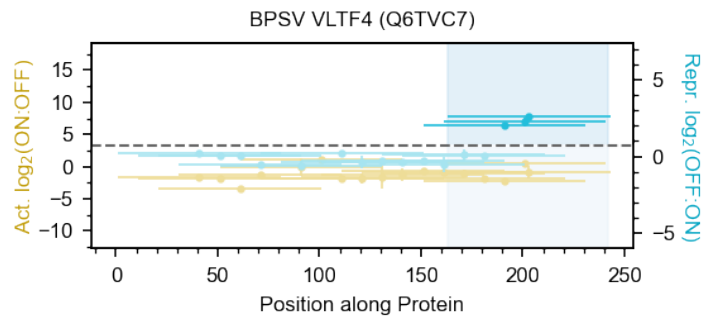

---

Extended repression domain from residues 151 to 242:

VASGGAAAGDDELDELGESDLDLAF AAILADFKHLTGRVKALSSVLT DVQASGVRRSFAGLSKALTEAAAIAAGGSKVPVAPRKKKAAAGKK

Max tile of repression domain from residues 163 to 242 (estimated 56.9% to 60.4% of cells repressed):

LDELGESDLDLAF AAILADFKHLTGRVKALSSVLT DVQASGVRRSFAGLSKALTEAAAIAAGGSKVPVAPRKKKAAAGKK

---

CPV VLTF4 (Q0NPX3)

Gene: VLTF4 ; Protein Family: VLTF4

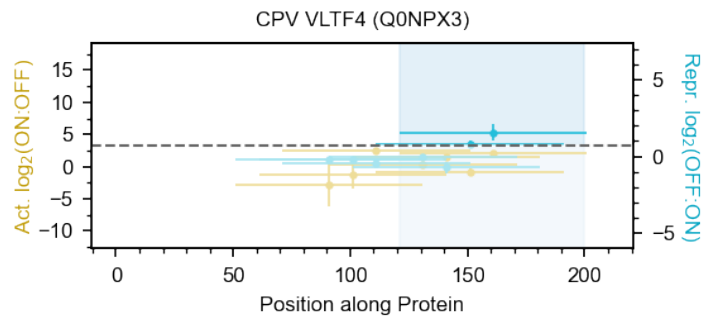

---

Extended repression domain from residues 111 to 200:

AVELDDSDGDDEPMAQAGAKVNHSARSDLSDLKVATDNIVKDLKKIITRISAVSTVLEDVQAAGISRQFTSMTKAITTSLDLVTEGKSKV

Max tile of repression domain from residues 121 to 200 (estimated 20.8% to 41.4% of cells repressed):

DEPMAQAGAKVNHSARSDLSDLKVATDNIVKDLKKIITRISAVSTVLEDVQAAGISRQFTSMTKAITTSLDLVTEGKSKV

---

MPXV VLTF4 (Q5IXT0)

Gene: VLTF4 ; Protein Family: VLTF4

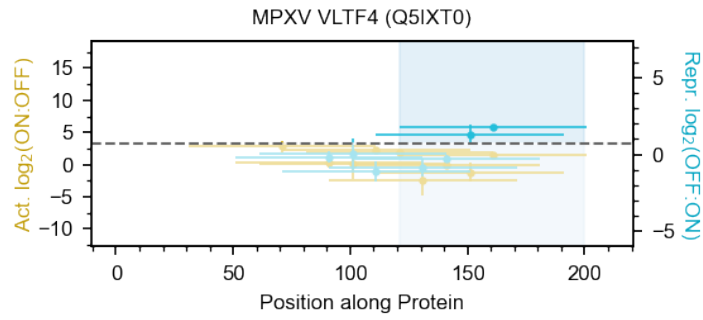

---

Extended repression domain from residues 111 to 200:

VELDDSDGDDEPMVQVEAGKVNHSTRSDLSDLKVATDNIVKDLKKIITRISAVSTVLEDVQAAGISRQFTSMTKAITTSDLVTEGKSKV

Max tile of repression domain from residues 121 to 200 (estimated 30.0% to 35.0% of cells repressed):

EPMVQVEAGKVNHSTRSDLSDLKVATDNIVKDLKKIITRISAVSTVLEDVQAAGISRQFTSMTKAITTSDLVTEGKSKV

---

ORFV VLTF4 (Q6TVQ9)

Gene: VLTF4 ; Protein Family: VLTF4

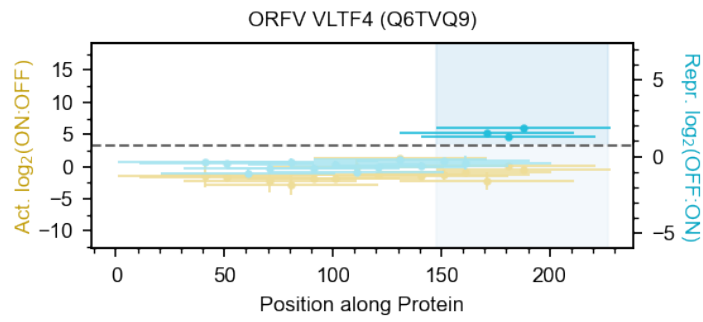

---

Extended repression domain from residues 131 to 227:

GDAEGGASARSPSIDNVDEMDDSDLMVAFSAILADFKDLTQRVKALSSVLTQATGIRRSFSTLGKALTEAAHIANTGAKPVTAPRKKKAATCKK

Max tile of repression domain from residues 148 to 227 (estimated 32.2% to 37.5% of cells repressed):

VDEMDDSDLMVAFSAILADFKDLTQRVKALSSVLTQATGIRRSFSTLGKALTEAAHIANTGAKPVTAPRKKKAATCKK

---

PCPV VLTF4 (D3IZK8)

Gene: VLTF4 ; Protein Family: VLTF4

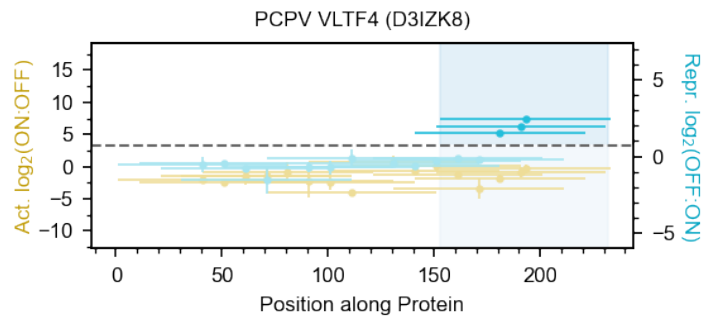

---

Extended repression domain from residues 141 to 232:

GASGRSPSDLNLDDEMDDSDLMLAFSTILADFKDLTHRVKCLSTVLTDVQAAGVRRSFSALGKALNEAAAIASGAKPAAAPRKKKAAASKK

Max tile of repression domain from residues 153 to 232 (estimated 51.8% to 52.8% of cells repressed):

LDEMDDSDLMLAFSTILADFKDLTHRVKCLSTVLTDVQAAGVRRSFSALGKALNEAAAIASGAKPAAAPRKKKAAASKK

---

CeHV1 VP16 (Q805Y1)

Gene: UL48 ; Protein Family: VP16

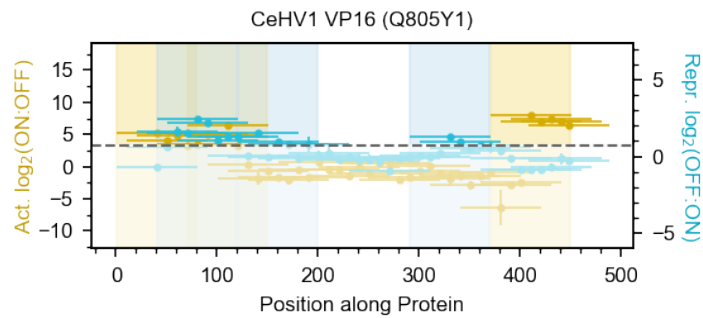

Extended activation domain from residues 371 to 487:

RTNYGSSIEGLLELPDDTDYDPDAPPPPPRLSFAAAPRRRSAAAPRTDVS LGDELRF DGDVSMTPSEALDDFDLTLGGDDHAGGLDDAAAYASLDMAD FEFEQMFTDALGIDDIGG

Max tile of activation domain from residues 371 to 450 (estimated 82.6% to 84.2% of cells activated):

RTNYGSSIEGLLELPDDTDYDPDAPPPPPRLSFAAAPRRRSAAAPRTDVS LGDELRF DGDVSMTPSEALDDFDLTLGGDD

Extended activation domain from residues 41 to 160:

TGRLSQAQIMPQPPVPVPPAALYNRLLEDLGF DGDGPALCTILDSWNEDLFSGLPANPDLYRECQFLSTLPSDVVAWGDGHTPDRGPIDIRAHGSAPFPSL PARREDLPAYCEALTRFFRA

Max tile of activation domain from residues 71 to 150 (estimated 59.4% to 65.9% of cells activated):

GFGDGPALCTILDSWNEDLFSGLPANPDLYRECQFLSTLPSDVVAWGDGHTPDRGPIDIRAHGSAPFPSL PARREDLPAY

Extended activation domain from residues 1 to 100:

MESLFDEL FADMDTDGDSPPRRPTGTAELPDAATAPRPYATGRLSQAQIMPQPPVPVPPAALYNRLLEDLGF DGDGPALCTILDSWNEDLFSGLPANPDL Y

Max tile of activation domain from residues 1 to 80 (estimated 40.5% to 40.9% of cells activated):

MESLFDEL FADMDTDGDSPPRRPTGTAELPDAATAPRPYATGRLSQAQIMPQPPVPVPPAALYNRLLEDLGF DGDGPALCT

Extended repression domain from residues 21 to 160:

RRPTGTAELPDAATAPRPYATGRLSQAQIMPQPPVPVPPAALYNRLLEDLGF DGDGPALCTILDSWNEDLFSGLPANPDLYRECQFLSTLPSDVVAWGDG HTPDRGPIDIRAHGSAPFPSL PARREDLPAYCEALTRFFRA

Max tile of repression domain from residues 41 to 120 (estimated 50.4% to 50.5% of cells repressed):

TGRLSQAQIMPQPPVPVPPAALYNRLLEDLGF DGDGPALCTILDSWNEDLFSGLPANPDLYRECQFLSTLPSDVVAWGDGH

Extended repression domain from residues 291 to 380:

ARLREINYVRERLNLPLVRSAAATEEPGAALTAAPALQTQRRARSSGYFMTLIRVKL DAYSEGSGSEGAEVLREHAYSRRRERTNYGSSIEG

Max tile of repression domain from residues 291 to 370 (estimated 21.7% to 26.8% of cells repressed):

ARLREINYVRERLNLPLVRSAAATEEPGAALTAAPALQTQRRARSSGYFMTLIRVKL DAYSEGSGSEGAEVLREHAYSRRRE

Extended repression domain from residues 121 to 210:

TPDRGPIDIRAHGSAPFPSL PARREDLPAYCEALTRFFRAELRAREESYRRVLANFCSALYRYLRASTRQLHRQAALKGRPRDLQEMLRA

Max tile of repression domain from residues 121 to 200 (estimated 18.4% to 22.1% of cells repressed):

TPDRGPIDIRAHGSAPFPSL PARREDLPAYCEALTRFFRAELRAREESYRRVLANFCSALYRYLRASTRQLHRQAALKGR



CeHV2 VP16 (Q5Y0Q4)

Gene: UL48 ; Protein Family: VP16

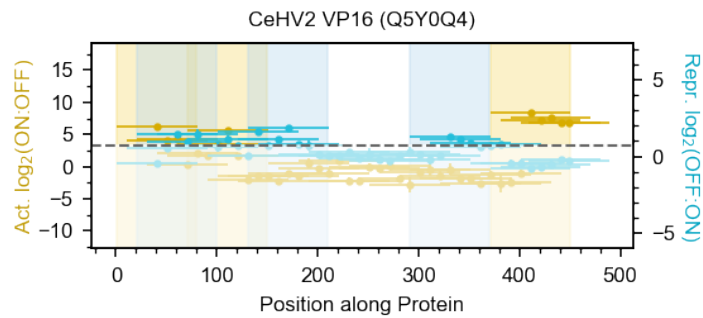

Extended activation domain from residues 371 to 488:

ERTNYGSSIEGLLELPDDADYDPDAPPPPRLSFATGSPRRRSTVPRTDVSLGDELCLDASPMTPSEALDDFDLTLGGDDHAGTLDAAAYASLDMA  
DFEFEQMFTDALGIDFEGG

Max tile of activation domain from residues 371 to 450 (estimated 85.4% to 87.6% of cells activated):

ERTNYGSSIEGLLELPDDADYDPDAPPPPRLSFATGSPRRRSTVPRTDVSLGDELCLDASPMTPSEALDDFDLTLGG

Extended activation domain from residues 1 to 100:

MESLFDELFDMDTDGASPPRRPTGGAELPDAATAPRPYATTRLSQAQIMPPPPVPIPPAALYNRLLEDLGFGDGPALCTILDSWNEDLFSGLPANPDLY

Max tile of activation domain from residues 1 to 80 (estimated 59.6% to 60.1% of cells activated):

MESLFDELFDMDTDGASPPRRPTGGAELPDAATAPRPYATTRLSQAQIMPPPPVPIPPAALYNRLLEDLGFGDGPALCT

Extended activation domain from residues 61 to 150:

ALYNRLLEDLGFGDGPALCTILDSWNEDLFSGLPANPDLYRECRFLSTLPGDVVAWGDAHAPDRAPIDIRAHGSAPFPSLPARREGLPAY

Max tile of activation domain from residues 71 to 150 (estimated 44.5% to 51.3% of cells activated):

GFGDGPALCTILDSWNEDLFSGLPANPDLYRECRFLSTLPGDVVAWGDAHAPDRAPIDIRAHGSAPFPSLPARREGLPAY

Extended repression domain from residues 121 to 230:

APDRAPIDIRAHGSAPFPSLPARREGLPAYCAALTRFFESELRAREESYRRVLANFCSALYRYLRASTRQLHRQAALKGRPRDLQEMLRASVAERYRET  
ARLARVMFLH

Max tile of repression domain from residues 131 to 210 (estimated 33.6% to 37.9% of cells repressed):

AHGSAPFPSLPARREGLPAYCAALTRFFESELRAREESYRRVLANFCSALYRYLRASTRQLHRQAALKGRPRDLQEMLRA

Extended repression domain from residues 21 to 120:

RRPTGGAELPDAATAPRPYATTRLSQAQIMPPPPVPIPPAALYNRLLEDLGFGDGPALCTILDSWNEDLFSGLPANPDLYRECRFLSTLPGDVVAWGDAH

Max tile of repression domain from residues 21 to 100 (estimated 23.8% to 28.1% of cells repressed):

RRPTGGAELPDAATAPRPYATTRLSQAQIMPPPPVPIPPAALYNRLLEDLGFGDGPALCTILDSWNEDLFSGLPANPDLY

Extended repression domain from residues 291 to 390:

ARLRELNHVRERLNLPLIRSAATEEPGAALTAAPALQTQARSSGYFMTLIRVKLDAYSEGSAGSEGAEVLREHAYSRRRERTNYGSSIEGLLELPDDAD

Max tile of repression domain from residues 291 to 370 (estimated 23.7% to 25.0% of cells repressed):

ARLRELNHVRERLNLPLIRSAATEEPGAALTAAPALQTQARSSGYFMTLIRVKLDAYSEGSAGSEGAEVLREHAYSRRR

### HSV2 VP16 (Q69113)

Gene: UL48 ; Protein Family: VP16

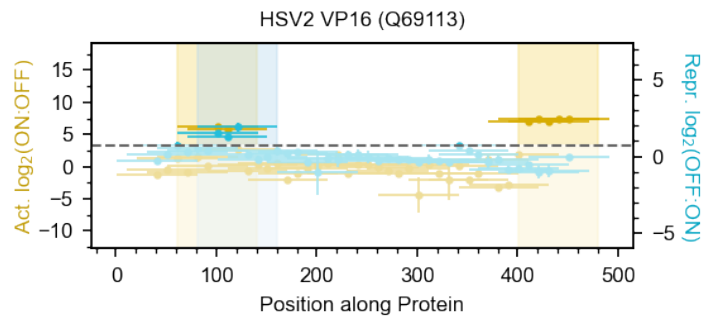

---

Extended activation domain from residues 371 to 490:

YGSTIEGLLDLPDDDDAPAEAGLVAPRMSFLSAGQRPRLSTTAPITDVSLGDELRLDGEEVDMTPADALDDFDLEMLGDVESPSPGMTHDPVSYGALD  
VDDFEFEQMFTDALGIDDFGG

Max tile of activation domain from residues 401 to 480 (estimated 75.1% to 81.6% of cells activated):

LSAGQRPRLSTTAPITDVSLGDELRLDGEEVDMTPADALDDFDLEMLGDVESPSPGMTHDPVSYGALDVDDFEFEQMFT

---

Extended activation domain from residues 61 to 150:

NRLDDLGFSAAGPALCTMLDTWNEDLFSGFPTNADMYRECKFLSTLPSDVIDWGDAHVPERSPIDIRAHGDVAFPTLPATRDELPSYIEA

Max tile of activation domain from residues 61 to 140 (estimated 59.6% to 61.4% of cells activated):

NRLDDLGFSAAGPALCTMLDTWNEDLFSGFPTNADMYRECKFLSTLPSDVIDWGDAHVPERSPIDIRAHGDVAFPTLPAT

---

Extended repression domain from residues 61 to 160:

NRLDDLGFSAAGPALCTMLDTWNEDLFSGFPTNADMYRECKFLSTLPSDVIDWGDAHVPERSPIDIRAHGDVAFPTLPATRDELPSYIEAMAQFFRGEL  
R

Max tile of repression domain from residues 81 to 160 (estimated 29.4% to 44.7% of cells repressed):

TWNEDLFSGFPTNADMYRECKFLSTLPSDVIDWGDAHVPERSPIDIRAHGDVAFPTLPATRDELPSYIEAMAQFFRGELR

---

SuHV1 VP16 (Q8QXN6)

Gene: UL48 ; Protein Family: VP16

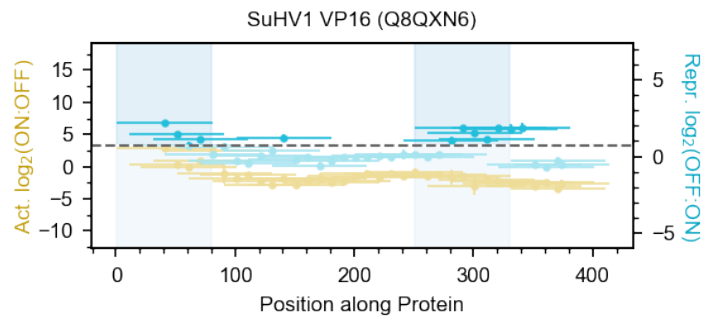

---

Extended repression domain from residues 1 to 110:

MRDEECVVFDEALLGGAAPGRPPVVAVPRAASPDALYQRLISDLAFDEGPALLGAMERWNEDLFSCLPGNEDLYARLVMLSASADEVAAQVRAPTAD  
ASVDLGVPGAEP

Max tile of repression domain from residues 1 to 80 (estimated 40.0% to 46.1% of cells repressed):

MRDEECVVFDEALLGGAAPGRPPVVAVPRAASPDALYQRLISDLAFDEGPALLGAMERWNEDLFSCLPGNEDLYARLVM

---

Extended repression domain from residues 241 to 380:

VVLLSGAPVPAAQLRAVNHRRELGLPLVRAGLIEEDGADLVEEPPFSAALPRAAGYLHQVRIKMEAYSREYRDHTYCRPPSPVASYGSTAEALLPPPS  
PSAVLPCDPTPPARVSAAPLITTVTLAEAEEDGALTTAAP

Max tile of repression domain from residues 251 to 330 (estimated 35.7% to 35.9% of cells repressed):

AAQLRAVNHRRELGLPLVRAGLIEEDGADLVEEPPFSAALPRAAGYLHQVRIKMEAYSREYRDHTYCRPPSPVASYGS

---

Other Tiling Screen Data from Ludwig, C.H. et al. 2023

HHV6A VTBP (P24437)

Gene: U58 ; Protein Family: VTBP

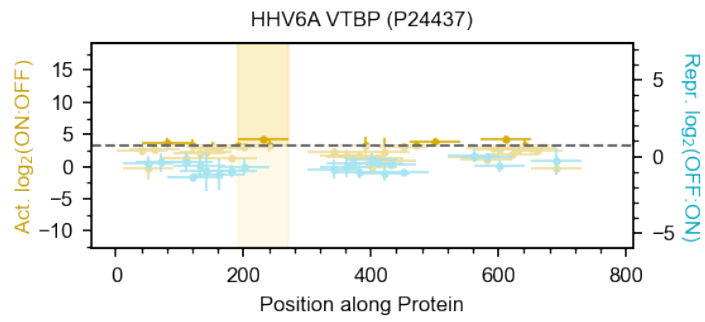

---

Extended activation domain from residues 191 to 280:

PYFLCYLCRHLTVIEIEQCTNDLISLLGPKVAQRVVIHFKLLFGFRHKPHIGTVDSWFWENFFMLELHKLWLTVVKHNRVTDDFFNVVYE

Max tile of activation domain from residues 191 to 270 (estimated 20.5% to 30.0% of cells activated):

PYFLCYLCRHLTVIEIEQCTNDLISLLGPKVAQRVVIHFKLLFGFRHKPHIGTVDSWFWENFFMLELHKLWLTVVKHNRV

---

KSHV VTBP (F5HFD2)

Gene: ORF24 ; Protein Family: VTBP

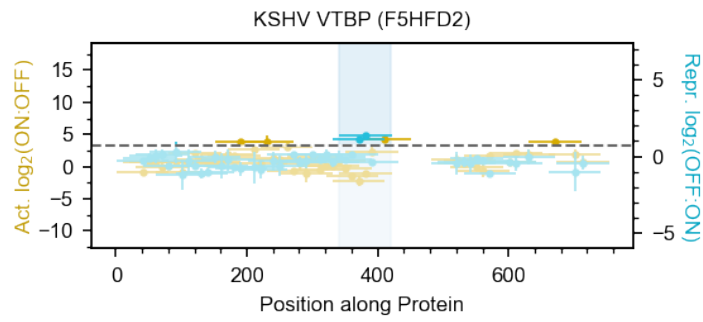

---

Extended repression domain from residues 331 to 420:

MCMVAVADCIGHSCSGLHPCANFLGTHETPRLLAATLSRIRYAPKDRRAAMKGNLQACFQRYAATDARTLGSSTVSDMLEPTKHVSLENFK

Max tile of repression domain from residues 341 to 420 (estimated 24.2% to 25.3% of cells repressed):

HSCSGLHPCANFLGTHETPRLLAATLSRIRYAPKDRRAAMKGNLQACFQRYAATDARTLGSSTVSDMLEPTKHVSLENFK

---

MERS-CoV E (K9N5R3)

Gene: E ; Protein Family: E

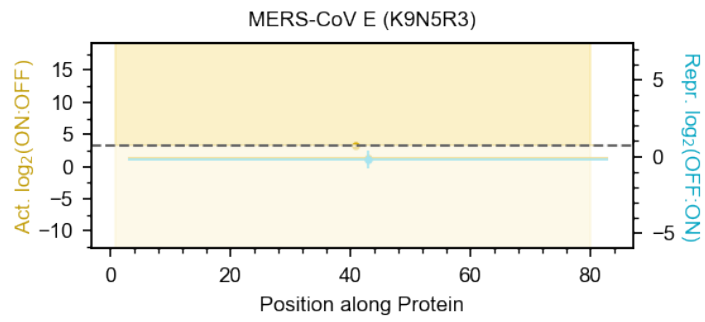

---

Extended activation domain from residues 1 to 80:

MLPFVQERIGLFIVNFFIFTVVCAITLLVCMAFLTATRLCVQCMTGFNTLLVQPALYLYNTGRSVYVKFQDSKPPLPDE

Max tile of activation domain from residues 1 to 80 (estimated 12.7% to 16.0% of cells activated):

MLPFVQERIGLFIVNFFIFTVVCAITLLVCMAFLTATRLCVQCMTGFNTLLVQPALYLYNTGRSVYVKFQDSKPPLPDE

---

Other Tiling Screen Data from Ludwig, C.H. et al. 2023

HCoV-OC43 HE (P30215)

Gene: HE ; Protein Family: HE

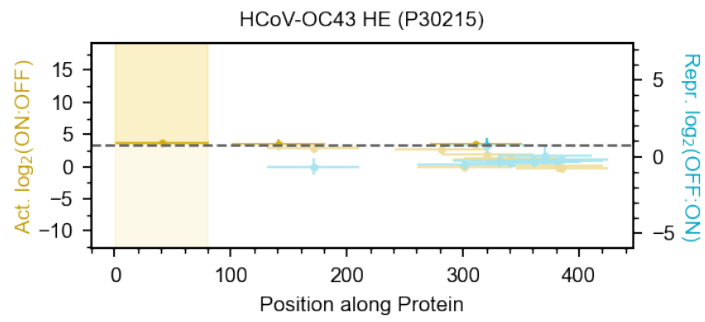

---

Extended activation domain from residues 1 to 80:

MFLPRFILVSCIIGSLGFYNPPTNVVSHVNGDWFLFGDSRSDCNHIVNINPHNYSYMDLNPVLCDSGKISSKAGNSIFR

Max tile of activation domain from residues 1 to 80 (estimated 14.0% to 20.6% of cells activated):

MFLPRFILVSCIIGSLGFYNPPTNVVSHVNGDWFLFGDSRSDCNHIVNINPHNYSYMDLNPVLCDSGKISSKAGNSIFR

---

HCoV-HKU1-N5 I (Q0ZME2)

Gene: I ; Protein Family: I

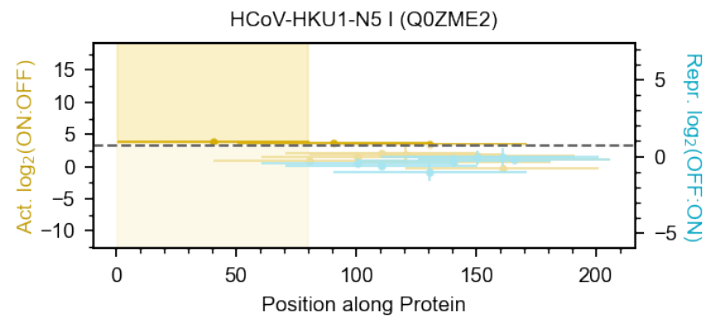

---

Extended activation domain from residues 1 to 80:

MLEVEAPLEIVQESSRLLGLTNLSEAIKPIIEAENPNQNSLCLLNHKETLSHIIPGSLGLPNFKKVETLNFQMVKEYPL

Max tile of activation domain from residues 1 to 80 (estimated 20.5% to 21.4% of cells activated):

MLEVEAPLEIVQESSRLLGLTNLSEAIKPIIEAENPNQNSLCLLNHKETLSHIIPGSLGLPNFKKVETLNFQMVKEYPL

---



SARS-CoV-2 M (P0DTC5)

Gene: M ; Protein Family: M

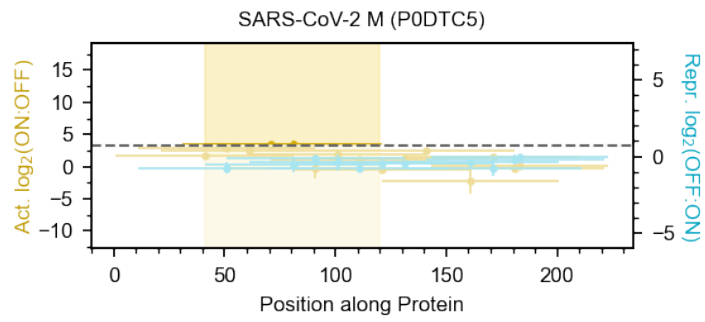

---

Extended activation domain from residues 31 to 120:

WICLLQFAYANRRNFLYIIKLIFLWLLWPVTLACFVLAAYRINWITGGIAIAMACLVGLMWLSYFIASFRLFARTRSMWSFNPETNILL

Max tile of activation domain from residues 41 to 120 (estimated 11.4% to 21.7% of cells activated):

NRNFLYIIKLIFLWLLWPVTLACFVLAAYRINWITGGIAIAMACLVGLMWLSYFIASFRLFARTRSMWSFNPETNILL

---

Other Tiling Screen Data from Ludwig, C.H. et al. 2023

HCoV-NL63 NS3 (Q6Q1S1)

Gene: NS3 ; Protein Family: NS3

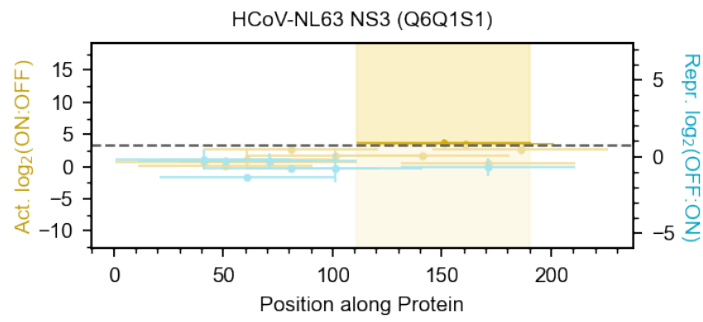

---

Extended activation domain from residues 111 to 200:

GYAYLYKNFSFVLFNVTKLCFVSGKCWYLEQSFYENRFAAIYGGDHVVLGGETITFVSFDDLYVAIRGSCEKNLQLMRKVDLYNGAVI

Max tile of activation domain from residues 111 to 190 (estimated 11.9% to 26.0% of cells activated):

GYAYLYKNFSFVLFNVTKLCFVSGKCWYLEQSFYENRFAAIYGGDHVVLGGETITFVSFDDLYVAIRGSCEKNLQLMR

---

Other Tiling Screen Data from Ludwig, C.H. et al. 2023

HCoV-HKU1-N1 NSP10 (P0C6U3|PRO\_0000338204)

Gene: NSP10 ; Protein Family: NSP10

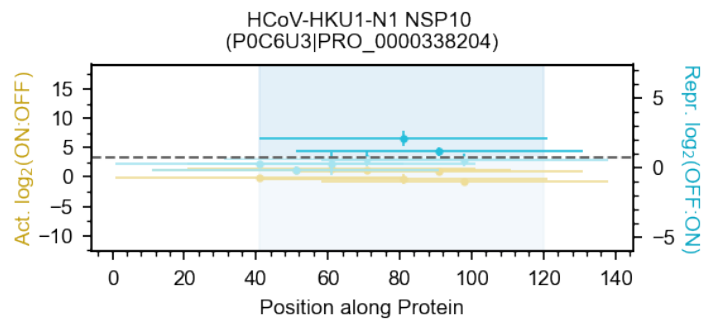

---

Extended repression domain from residues 31 to 137:

IQQGGVPIINCVKMLCDHAGTGMAITIKPEATINQDSYGGASVCIYCRARVEHPDVDGICKLRGKFVQVPLGIKDPILYVLTHDVCQVCGFWRDGCSCCVG  
SSVAVQ

Max tile of repression domain from residues 41 to 120 (estimated 27.4% to 59.6% of cells repressed):

CVKMLCDHAGTGMAITIKPEATINQDSYGGASVCIYCRARVEHPDVDGICKLRGKFVQVPLGIKDPILYVLTHDVCQVCG

---

Other Tiling Screen Data from Ludwig, C.H. et al. 2023

HCoV-HKU1-N1 NSP10 (P0C6X2|PRO\_5000093342)

Gene: NSP10 ; Protein Family: NSP10

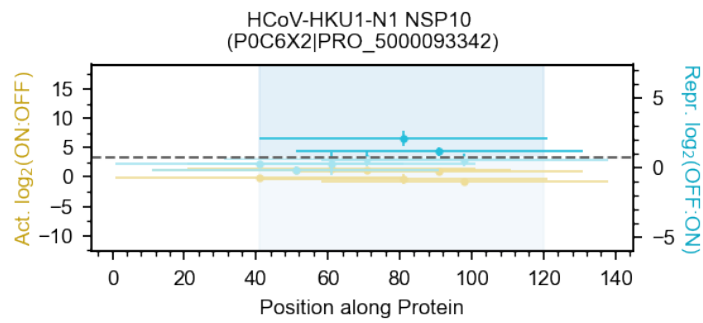

---

Extended repression domain from residues 31 to 137:

IQGGVPIINCVKMLCDHAGTGMAITIKPEATINQDSYGGASVCIYCRARVEHPDVDGICKLRGKFVQVPLGIKDPILYVLTHDVCQVCGFWRDGCSCCVG  
SSVAVQ

Max tile of repression domain from residues 41 to 120 (estimated 27.4% to 59.6% of cells repressed):

CVKMLCDHAGTGMAITIKPEATINQDSYGGASVCIYCRARVEHPDVDGICKLRGKFVQVPLGIKDPILYVLTHDVCQVCG

---

HCoV-HKU1-N2 NSP10 (P0C6U4|PRO\_0000338216)

Gene: NSP10 ; Protein Family: NSP10

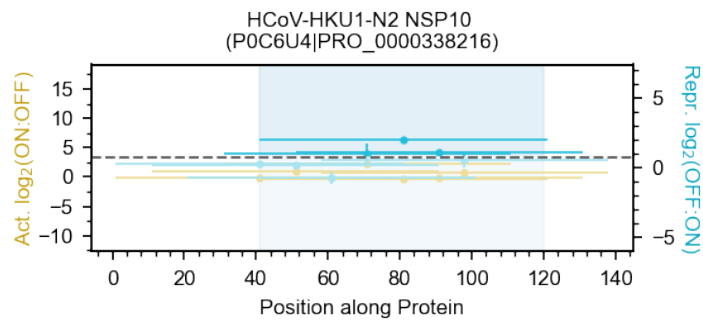

---

Extended repression domain from residues 31 to 130:

IQGGVPIINCVKMLCDHAGTGMAITIKPEATINQDSYGGASVCIYCRARVEHPDVGDLCKLRGKFVQVPLGIKDPILYVLTHDVCQVCGFWRDGSQSCV

Max tile of repression domain from residues 41 to 120 (estimated 35.6% to 41.3% of cells repressed):

CVKMLCDHAGTGMAITIKPEATINQDSYGGASVCIYCRARVEHPDVGDLCKLRGKFVQVPLGIKDPILYVLTHDVCQVCG

---

Other Tiling Screen Data from Ludwig, C.H. et al. 2023

HCoV-HKU1-N2 NSP10 (P0C6X3|PRO\_0000297782)

Gene: NSP10 ; Protein Family: NSP10

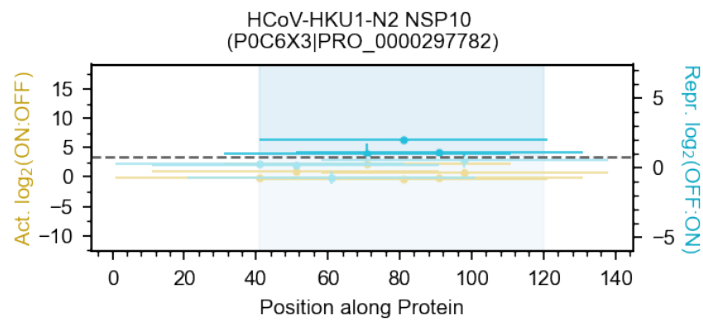

---

Extended repression domain from residues 31 to 130:

IQGGVPIINCVKMLCDHAGTGMAITIKPEATINQDSYGGASVCIYCRARVEHPDVDGLCKLRGKFVQVPLGIKDPILYVLTHDVCQVCGFWRDGCSCV

Max tile of repression domain from residues 41 to 120 (estimated 35.6% to 41.3% of cells repressed):

CVKMLCDHAGTGMAITIKPEATINQDSYGGASVCIYCRARVEHPDVDGLCKLRGKFVQVPLGIKDPILYVLTHDVCQVCG

---

Other Tiling Screen Data from Ludwig, C.H. et al. 2023

HCoV-HKU1-N5 NSP10 (P0C6U5|PRO\_0000338228)

Gene: NSP10 ; Protein Family: NSP10

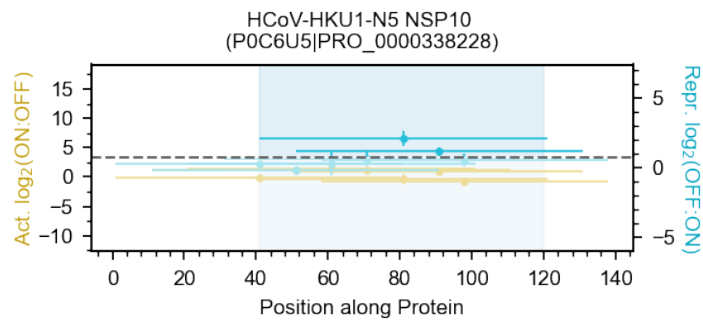

---

Extended repression domain from residues 31 to 137:

IQGGVPIINCVKMLCDHAGTGMAITIKPEATINQDSYGGASVCIYCRARVEHPDVDGICKLRGKFVQVPLGIKDPILYVLTHDVCQVCGFWRDGCSCCVG  
SSVAVQ

Max tile of repression domain from residues 41 to 120 (estimated 27.4% to 59.6% of cells repressed):

CVKMLCDHAGTGMAITIKPEATINQDSYGGASVCIYCRARVEHPDVDGICKLRGKFVQVPLGIKDPILYVLTHDVCQVCG

---

HCoV-HKU1-N5 NSP10 (P0C6X4|PRO\_0000297797)

Gene: NSP10 ; Protein Family: NSP10

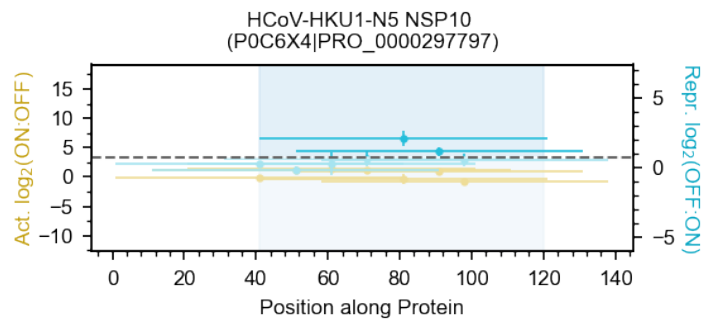

---

Extended repression domain from residues 31 to 137:

IQGGVPIINCVKMLCDHAGTGMAITIKPEATINQDSYGGASVCIYCRARVEHPDVDGICKLRGKFVQVPLGIKDPILYVLTHDVCQVCGFWRDGCSCCVG  
SSVAVQ

Max tile of repression domain from residues 41 to 120 (estimated 27.4% to 59.6% of cells repressed):

CVKMLCDHAGTGMAITIKPEATINQDSYGGASVCIYCRARVEHPDVDGICKLRGKFVQVPLGIKDPILYVLTHDVCQVCG

---



Other Tiling Screen Data from Ludwig, C.H. et al. 2023

MERS-CoV NSP10 (K9N638|PRO\_0000422463)

Gene: NSP10 ; Protein Family: NSP10

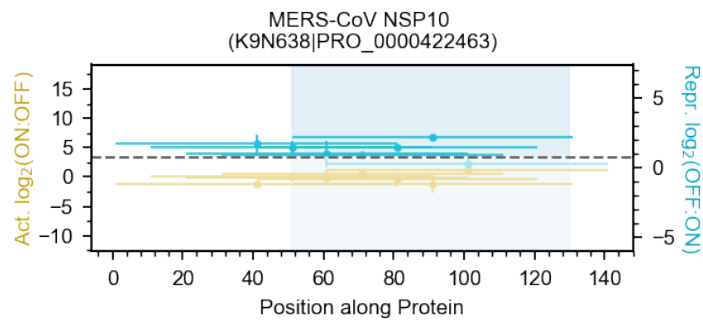

---

Extended repression domain from residues 1 to 130:

AGSNTEFASNSSVLSLVNFTVDPQKAYLDFVNAGGAPLTNCVKMLTPKTGTGIAISVKPESTADQETYGGASVCLYCRAHIEHPDVSGVCKYKGFVQIP  
AQCVRDPVGFCLSNTPCNVCQYWIGYGCNC

Max tile of repression domain from residues 51 to 130 (estimated 38.0% to 47.8% of cells repressed):

TGIAISVKPESTADQETYGGASVCLYCRAHIEHPDVSGVCKYKGFVQIPAQCVRDPVGFCLSNTPCNVCQYWIGYGCNC

---

Other Tiling Screen Data from Ludwig, C.H. et al. 2023

MERS-CoV NSP10 (K9N7C7|PRO\_0000422448)

Gene: NSP10 ; Protein Family: NSP10

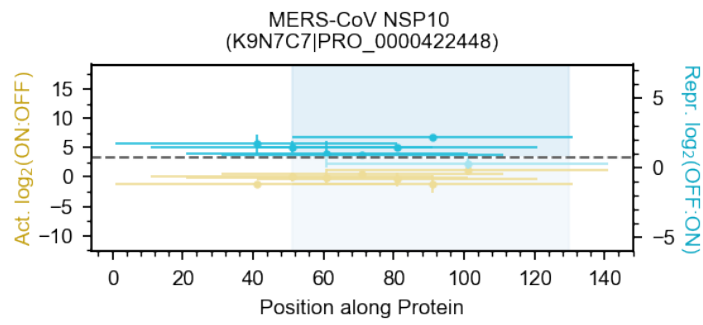

---

Extended repression domain from residues 1 to 130:

AGSNTEFASNSSVLSLVNFTVDPQKAYLDFVNAGGAPLTNCVKMLTPKTGTGIAISVKPESTADQETYGGASVCLYCRAHIEHPDVSGVCKYKGFVQIP  
AQCVRDPVGFCLSNTPCNVCQYWIGYGCNC

Max tile of repression domain from residues 51 to 130 (estimated 38.0% to 47.8% of cells repressed):

TGIAISVKPESTADQETYGGASVCLYCRAHIEHPDVSGVCKYKGFVQIPAQCVRDPVGFCLSNTPCNVCQYWIGYGCNC

---

Other Tiling Screen Data from Ludwig, C.H. et al. 2023

BtCoV-HKU3 NSP12 (P0C6W2|PRO\_0000291345)

Gene: NSP12 ; Protein Family: NSP12

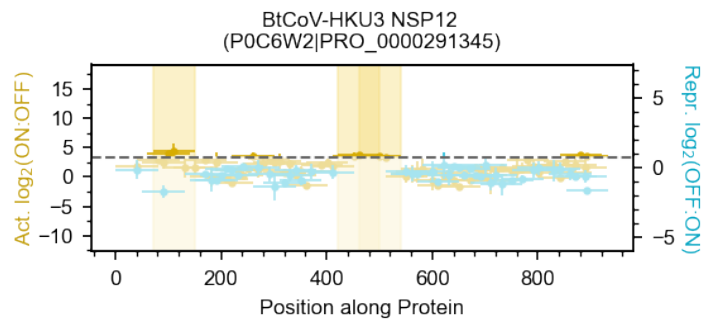

---

Extended activation domain from residues 61 to 150:

EEGNLLDSYFVVKRHTMSNYQHEETIYNLIKECPAVAVHDFFKFRVDGDMVPHISRQRLTKYTMADLVYALRHFDEGNCDTLKEILVTYN

Max tile of activation domain from residues 71 to 150 (estimated 12.7% to 50.6% of cells activated):

VVKRHTMSNYQHEETIYNLIKECPAVAVHDFFKFRVDGDMVPHISRQRLTKYTMADLVYALRHFDEGNCDTLKEILVTYN

---

Extended activation domain from residues 411 to 500:

KPGNFNKDFYDFAVSKGFFKEGSSVELKHFFFAQDGNAAISDYDYRYNLPTMCDIRQLLFVVEVDKYFDCYDGGCINANQVIVNNLKD

Max tile of activation domain from residues 421 to 500 (estimated 15.1% to 22.9% of cells activated):

DFAVSKGFFKEGSSVELKHFFFAQDGNAAISDYDYRYNLPTMCDIRQLLFVVEVDKYFDCYDGGCINANQVIVNNLKD

---

Extended activation domain from residues 461 to 550:

PTMCDIRQLLFVVEVDKYFDCYDGGCINANQVIVNNLDKSAGFPFNKWKARLYYDMSYEDQDALFAYTKRNVIPITITQMNLKYAISA

Max tile of activation domain from residues 461 to 540 (estimated 15.5% to 17.7% of cells activated):

PTMCDIRQLLFVVEVDKYFDCYDGGCINANQVIVNNLDKSAGFPFNKWKARLYYDMSYEDQDALFAYTKRNVIPITIT

---

Other Tiling Screen Data from Ludwig, C.H. et al. 2023

BtCoV-RaTG13 NSP12 (A0A6B9WIQ1|PRO\_0000449629)

Gene: NSP12 ; Protein Family: NSP12

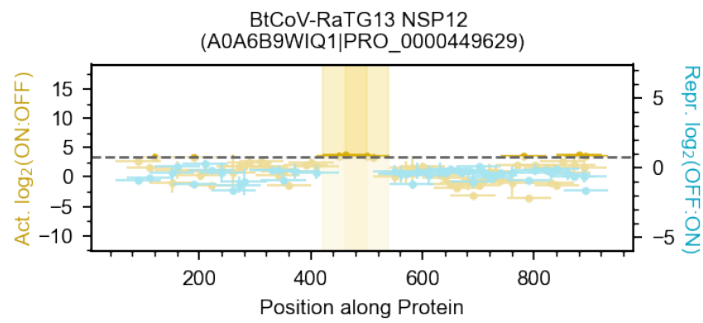

---

Extended activation domain from residues 411 to 500:

KPGNFKDFYDFAVSKGFFKEGSSVELKHFFFAQDGNAAISDYDYRYNLPTMCDIRQLLFVVEVDKYFDCYDGGCINANQVIVNNLDK

Max tile of activation domain from residues 421 to 500 (estimated 15.1% to 22.9% of cells activated):

DFAVSKGFFKEGSSVELKHFFFAQDGNAAISDYDYRYNLPTMCDIRQLLFVVEVDKYFDCYDGGCINANQVIVNNLDK

---

Extended activation domain from residues 461 to 550:

PTMCDIRQLLFVVEVDKYFDCYDGGCINANQVIVNNLDKSAGFPFNKWKARLYDMSYEDQDALFAYTKRNVIPITITQMNLYAISA

Max tile of activation domain from residues 461 to 540 (estimated 15.5% to 17.7% of cells activated):

PTMCDIRQLLFVVEVDKYFDCYDGGCINANQVIVNNLDKSAGFPFNKWKARLYDMSYEDQDALFAYTKRNVIPITIT

---

Other Tiling Screen Data from Ludwig, C.H. et al. 2023

HCoV-229E NSP12 (P0C6X1|PRO\_0000037303)

Gene: NSP12 ; Protein Family: NSP12

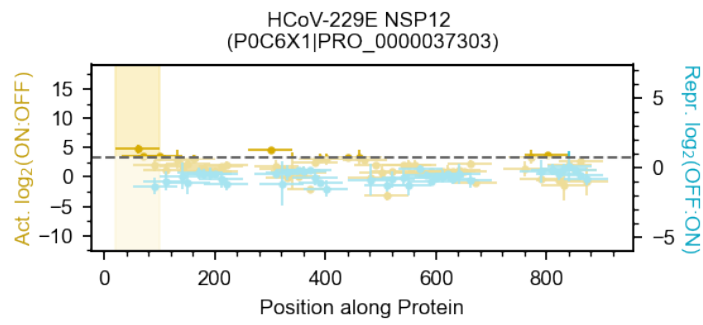

---

Extended activation domain from residues 21 to 110:

CNGTDIDYCVRAFDVYNKDASFIGKNLKSNCVRFKNVDKDDAFYIVKRCIKSVMDHEQSMYNLLKGCNAVAKHDFFTWHEGRTIYGNVSR

Max tile of activation domain from residues 21 to 100 (estimated 21.8% to 48.8% of cells activated):

CNGTDIDYCVRAFDVYNKDASFIGKNLKSNCVRFKNVDKDDAFYIVKRCIKSVMDHEQSMYNLLKGCNAVAKHDFFTWHE

---

Other Tiling Screen Data from Ludwig, C.H. et al. 2023

HCoV-HKU1-N1 NSP12 (P0C6X2|PRO\_5000093343)

Gene: NSP12 ; Protein Family: NSP12

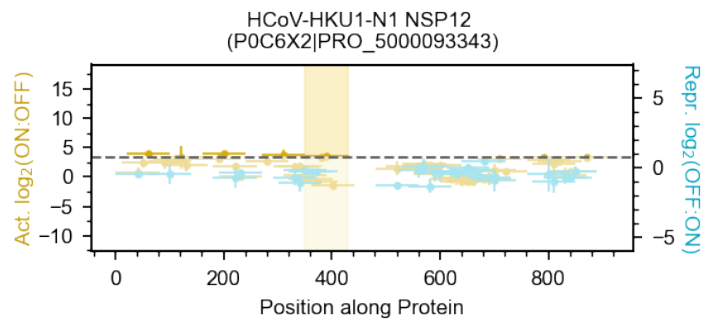

---

Extended activation domain from residues 341 to 430:

GYHYKELGVVMNLDVDTHRYRLSLKDLLLLYAADPAMHVASASALLDLRTCCFSVAAITSGIKFQTVKPGNFNQDFYEFVKSGLFKEGST

Max tile of activation domain from residues 351 to 430 (estimated 13.9% to 21.5% of cells activated):

MNLDVDTHRYRLSLKDLLLLYAADPAMHVASASALLDLRTCCFSVAAITSGIKFQTVKPGNFNQDFYEFVKSGLFKEGST

---

Other Tiling Screen Data from Ludwig, C.H. et al. 2023

HCoV-HKU1-N2 NSP12 (P0C6X3|PRO\_0000297783)

Gene: NSP12 ; Protein Family: NSP12

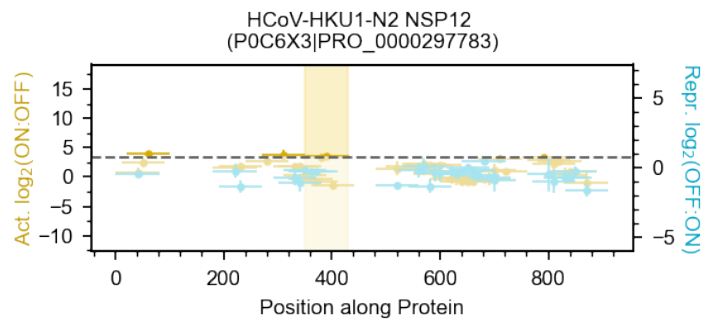

---

Extended activation domain from residues 341 to 430:

GYHYKELGVVMNLDVDTHRYRLSLKDLLLLYAADPAMHVASASALLDLRTCCFSVAAITSGIKFQTVKPGNFNQDFYEFVKSGLFKEGST

Max tile of activation domain from residues 351 to 430 (estimated 13.9% to 21.5% of cells activated):

MNLDVDTHRYRLSLKDLLLLYAADPAMHVASASALLDLRTCCFSVAAITSGIKFQTVKPGNFNQDFYEFVKSGLFKEGST

---

Other Tiling Screen Data from Ludwig, C.H. et al. 2023

HCoV-HKU1-N5 NSP12 (P0C6X4|PRO\_0000297798)

Gene: NSP12 ; Protein Family: NSP12

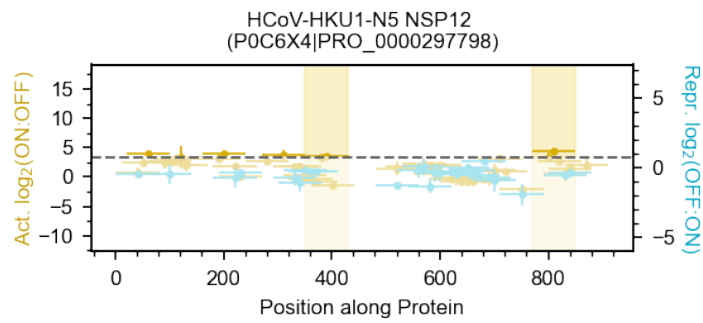

---

Extended activation domain from residues 761 to 850:

CYNSDYANKGYIANISAFQQVLYYQNNVFMSESKCWVENDITNGPHEFCSQHTMLVKIDGDYVYLPYPDPSRILGAGCFVDDLLKTDSVL

Max tile of activation domain from residues 771 to 850 (estimated 26.0% to 29.6% of cells activated):

YIANISAFQQVLYYQNNVFMSESKCWVENDITNGPHEFCSQHTMLVKIDGDYVYLPYPDPSRILGAGCFVDDLLKTDSVL

---

Extended activation domain from residues 341 to 430:

GYHYKELGVVMNLDVDTHRYRLSLKDLLLYAADPAMHVASASALLDLRTCCFSVAAITSGIKFQTVKPGNFNQDFYEFVKSGLFKEGST

Max tile of activation domain from residues 351 to 430 (estimated 13.9% to 21.5% of cells activated):

MNLDVDTHRYRLSLKDLLLYAADPAMHVASASALLDLRTCCFSVAAITSGIKFQTVKPGNFNQDFYEFVKSGLFKEGST

---



Other Tiling Screen Data from Ludwig, C.H. et al. 2023

HCoV-NL63 NSP12 (P0C6X5|PRO\_0000283884)

Gene: NSP12 ; Protein Family: NSP12

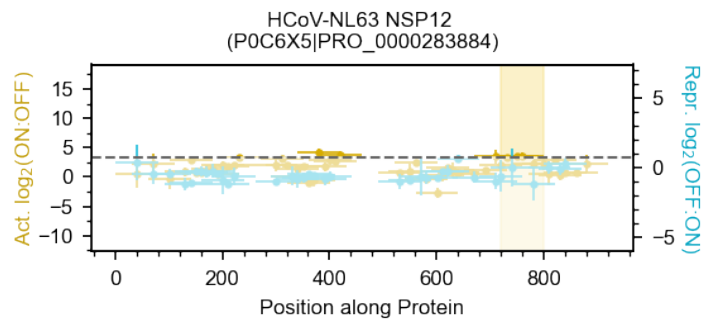

---

Extended activation domain from residues 711 to 800:

NNVNVRLQRRLYDNCYRLTSVEESFIDDYYGYLRKHFMMILSDDGVVCYNKDYAELGYIADISAFKATLYQNNVFMSTSKCWVEEDL

Max tile of activation domain from residues 721 to 800 (estimated 13.0% to 23.9% of cells activated):

RLYDNCYRLTSVEESFIDDYYGYLRKHFMMILSDDGVVCYNKDYAELGYIADISAFKATLYQNNVFMSTSKCWVEEDL

---

Other Tiling Screen Data from Ludwig, C.H. et al. 2023

SARS-CoV-2 NSP12 (P0DTD1|PRO\_0000449629)

Gene: NSP12 ; Protein Family: NSP12

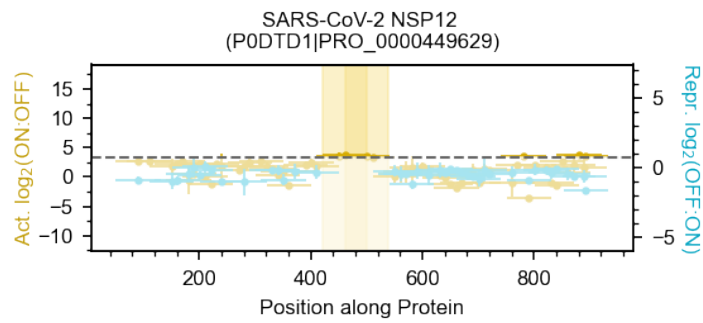

---

Extended activation domain from residues 411 to 500:

KPGNFKDFYDFAVSKGFFKEGSSVELKHFFFAQDGNAAISDYDYRYNLPTMCDIRQLLFVVEVDKYFDCYDGGCINANQVIVNNLDK

Max tile of activation domain from residues 421 to 500 (estimated 15.1% to 22.9% of cells activated):

DFAVSKGFFKEGSSVELKHFFFAQDGNAAISDYDYRYNLPTMCDIRQLLFVVEVDKYFDCYDGGCINANQVIVNNLDK

---

Extended activation domain from residues 461 to 550:

PTMCDIRQLLFVVEVDKYFDCYDGGCINANQVIVNNLDKSAGFPFNKWKARLYDSMSYEDQDALFAYTKRNVIPITITQMNLKYAISA

Max tile of activation domain from residues 461 to 540 (estimated 15.5% to 17.7% of cells activated):

PTMCDIRQLLFVVEVDKYFDCYDGGCINANQVIVNNLDKSAGFPFNKWKARLYDSMSYEDQDALFAYTKRNVIPITIT

---

Other Tiling Screen Data from Ludwig, C.H. et al. 2023

SARS-CoV NSP12 (P0C6X7|PRO\_0000037318)

Gene: NSP12 ; Protein Family: NSP12

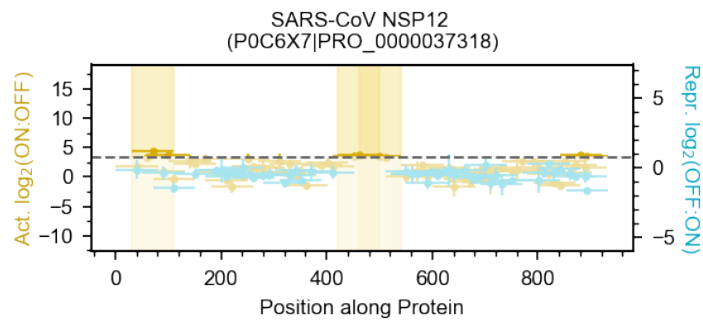

---

Extended activation domain from residues 21 to 110:

PCGTGTSTDVVYRAFDIYNEKVAGFAKFLKTNCCRFQEKDEEGNLLDSYFVVKRHTMSNYQHEETIYNLVKDCPAVAVHDFFKFRVDGDM

Max tile of activation domain from residues 31 to 110 (estimated 21.9% to 34.0% of cells activated):

VYRAFDIYNEKVAGFAKFLKTNCCRFQEKDEEGNLLDSYFVVKRHTMSNYQHEETIYNLVKDCPAVAVHDFFKFRVDGDM

---

Extended activation domain from residues 411 to 500:

KPGNFNKDFYDFAVSKGFFKEGSSVELKHFFFAQDGNAAISDYDYRYNLPTMCDIRQLLFVVEVVDKYFDCYDGGCINANQVIVNNLDK

Max tile of activation domain from residues 421 to 500 (estimated 15.1% to 22.9% of cells activated):

DFAVSKGFFKEGSSVELKHFFFAQDGNAAISDYDYRYNLPTMCDIRQLLFVVEVVDKYFDCYDGGCINANQVIVNNLDK

---

Extended activation domain from residues 461 to 550:

PTMCDIRQLLFVVEVVDKYFDCYDGGCINANQVIVNNLDKSAGFPFNKWKARLYYDSMSYEDQDALFAYTKRNVIPITITQMNLKYAISA

Max tile of activation domain from residues 461 to 540 (estimated 15.5% to 17.7% of cells activated):

PTMCDIRQLLFVVEVVDKYFDCYDGGCINANQVIVNNLDKSAGFPFNKWKARLYYDSMSYEDQDALFAYTKRNVIPITIT

---

Other Tiling Screen Data from Ludwig, C.H. et al. 2023

HCoV-229E NSP13 (P0C6X1|PRO\_0000037304)

Gene: NSP13 ; Protein Family: NSP13

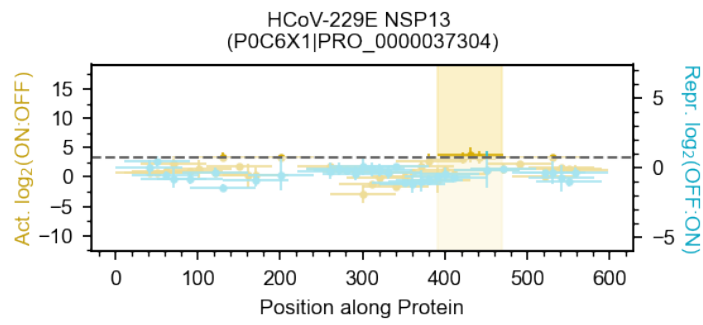

---

Extended activation domain from residues 391 to 480:

RISYKHIVYVGDPQQLPAPRVLISKGVMEPIDYNVVTQRMCAIGPDVFLHKCYRCPAEIVNTVSELVYENKFVPVKEASKQCFKIFERGS

Max tile of activation domain from residues 391 to 470 (estimated 8.0% to 37.3% of cells activated):

RISYKHIVYVGDPQQLPAPRVLISKGVMEPIDYNVVTQRMCAIGPDVFLHKCYRCPAEIVNTVSELVYENKFVPVKEASK

---

Other Tiling Screen Data from Ludwig, C.H. et al. 2023

MERS-CoV NSP14 (K9N7C7|PRO\_0000422451)

Gene: NSP14 ; Protein Family: NSP14

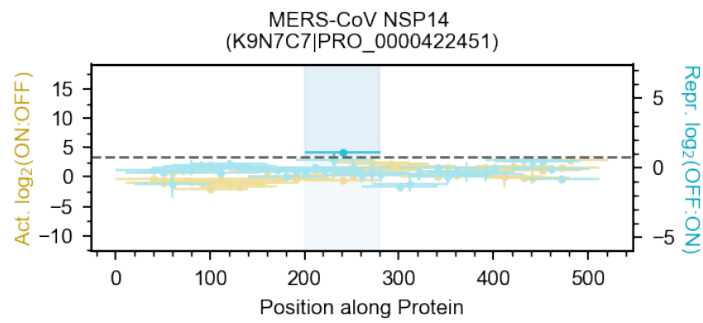

---

Extended repression domain from residues 191 to 280:

ELTSASYFCKIGKEQKCCMCNRRAAAYSSPLQSYACWTHSCGYDYVYNPFFVDVQQWGYVGNLATNHDRYCSVHQGAHVASNDAIMTRCL

Max tile of repression domain from residues 201 to 280 (estimated 19.7% to 23.6% of cells repressed):

IGKEQKCCMCNRRAAAYSSPLQSYACWTHSCGYDYVYNPFFVDVQQWGYVGNLATNHDRYCSVHQGAHVASNDAIMTRCL

---

Other Tiling Screen Data from Ludwig, C.H. et al. 2023

HCoV-HKU1-N2 NSP15 (P0C6X3|PRO\_0000297786)

Gene: NSP15 ; Protein Family: NSP15

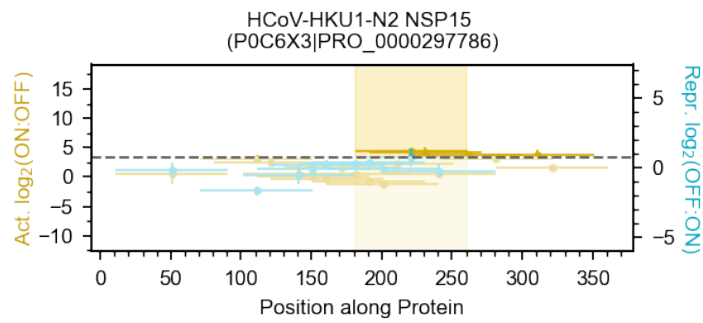

---

Extended activation domain from residues 181 to 270:

DVIFSRADSLSPSHYWSPQGNLGGNCAGNASGNDALARFTIFTQSRVLSTFEPRSDLERDFIDMEDSLFIAKYGLEDYAFDHIVYGSFNY

Max tile of activation domain from residues 181 to 260 (estimated 28.6% to 30.2% of cells activated):

DVIFSRADSLSPSHYWSPQGNLGGNCAGNASGNDALARFTIFTQSRVLSTFEPRSDLERDFIDMEDSLFIAKYGLEDYAF

---

Other Tiling Screen Data from Ludwig, C.H. et al. 2023

SARS-CoV-2 NSP15 (P0DTD1|PRO\_0000449632)

Gene: NSP15 ; Protein Family: NSP15

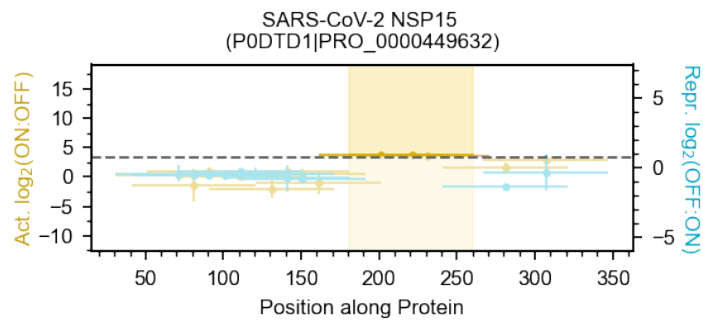

---

Extended activation domain from residues 181 to 270:

KVDGVVQQLPETYFTQSRNLQEFKPRSQMEIDFLELAMDEFIERYKLEGYAFEHIVYGDFSHSQLGGLHLLIGLAKRFKESPFLEDFIP

Max tile of activation domain from residues 181 to 260 (estimated 16.2% to 21.0% of cells activated):

KVDGVVQQLPETYFTQSRNLQEFKPRSQMEIDFLELAMDEFIERYKLEGYAFEHIVYGDFSHSQLGGLHLLIGLAKRFKE

---

Other Tiling Screen Data from Ludwig, C.H. et al. 2023

SARS-CoV NSP15 (P0C6X7|PRO\_0000037321)

Gene: NSP15 ; Protein Family: NSP15

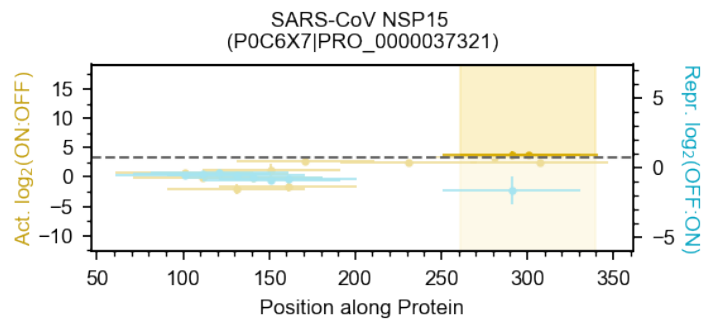

---

Extended activation domain from residues 241 to 340:

SHGQLGGLHLMIGLAKRSQDSPLKLEDFIPMDSTVKNYFITDAQTGSSKVCVSVIDLDDDFVEIIKSQDLSVISKVVKVTIDYAEISFMLWCKDGHVET

Max tile of activation domain from residues 261 to 340 (estimated 14.9% to 23.2% of cells activated):

SPLKLEDFIPMDSTVKNYFITDAQTGSSKVCVSVIDLDDDFVEIIKSQDLSVISKVVKVTIDYAEISFMLWCKDGHVET

---



BtCoV-RaTG13 NSP1 (A0A6B9WIQ1|PRO\_0000449619)

Gene: NSP1 ; Protein Family: NSP1

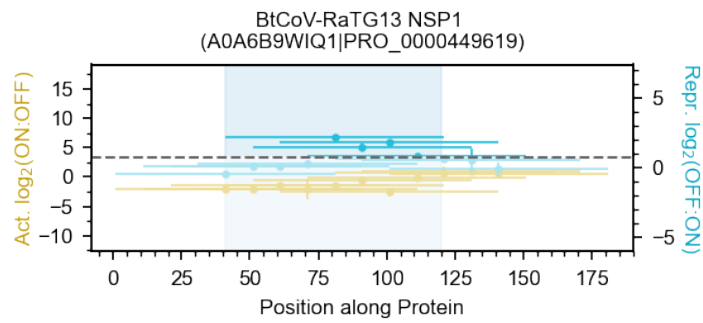

---

Extended repression domain from residues 41 to 160:

EARQHLLKDGTCGLVEVEKGVLPQLEQPYVFIKRS DARTAPHGHVMMVELVAELNGIQYGRSGETLGVLVPYVGETPVVYRKVLLRKNGKNGAGGHSYGA  
DLKSFDLGDELGTDPYEDFQEN

Max tile of repression domain from residues 41 to 120 (estimated 42.3% to 46.4% of cells repressed):

EARQHLLKDGTCGLVEVEKGVLPQLEQPYVFIKRS DARTAPHGHVMMVELVAELNGIQYGRSGETLGVLVPYVGETPVVYRK

---

Other Tiling Screen Data from Ludwig, C.H. et al. 2023

HCoV-HKU1-N5 NSP1 (POC6U5|PRO\_0000338219)

Gene: NSP1 ; Protein Family: NSP1

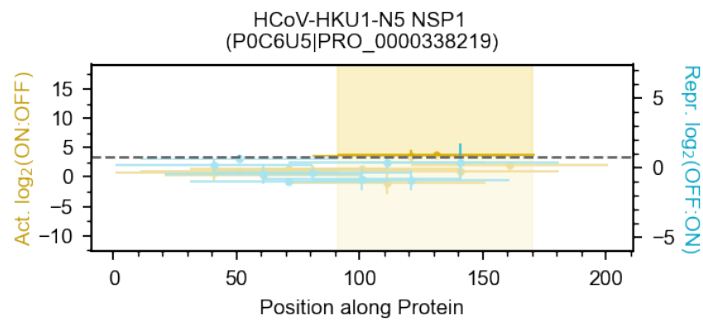

---

Extended activation domain from residues 81 to 170:

FVHEDLHVVEVLTKTAVKSGTAILIKSPLHSLGGFPKGYVMGLFRSYKTKRYVVHLSMTTSTTNFGEDFFGWIVPFGFMPSYVHKWFQF

Max tile of activation domain from residues 91 to 170 (estimated 17.0% to 20.3% of cells activated):

VLTKTAVKSGTAILIKSPLHSLGGFPKGYVMGLFRSYKTKRYVVHLSMTTSTTNFGEDFFGWIVPFGFMPSYVHKWFQF

---

Other Tiling Screen Data from Ludwig, C.H. et al. 2023

HCoV-HKU1-N5 NSP1 (P0C6X4|PRO\_0000297788)

Gene: NSP1 ; Protein Family: NSP1

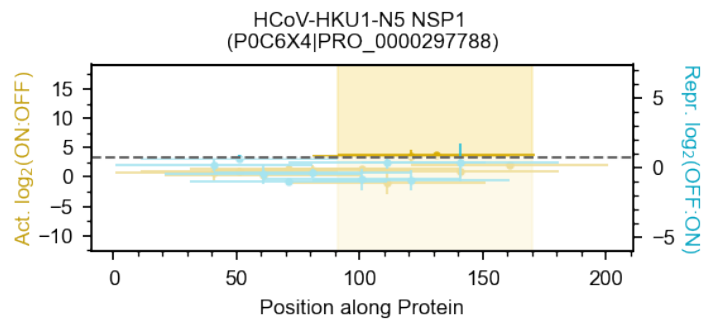

---

Extended activation domain from residues 81 to 170:

FVHEDLHVVEVLTKTAVKSGTAILIKSPLHSLGGFPKGYVMGLFRSYKTKRYVVHHLSTTTNFGEDFFGWIVPFGFMPSYVHKWFQF

Max tile of activation domain from residues 91 to 170 (estimated 17.0% to 20.3% of cells activated):

VLTKTAVKSGTAILIKSPLHSLGGFPKGYVMGLFRSYKTKRYVVHHLSTTTNFGEDFFGWIVPFGFMPSYVHKWFQF

---

Other Tiling Screen Data from Ludwig, C.H. et al. 2023

HCoV-229E NSP2 (P0C6U2|PRO\_0000338184)

Gene: NSP2 ; Protein Family: NSP2

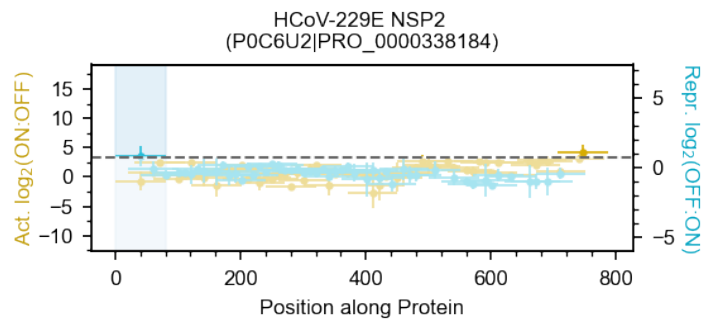

---

Extended repression domain from residues 1 to 80:

NVTYTDQYLCGADGKPVMSSEDLWQFVDHFGENEIIIINGHTYVCAWLTKRKPLDYKRQNNLAIEEIEYVHGDALHTLRNG

Max tile of repression domain from residues 1 to 80 (estimated 15.4% to 28.2% of cells repressed):

NVTYTDQYLCGADGKPVMSSEDLWQFVDHFGENEIIIINGHTYVCAWLTKRKPLDYKRQNNLAIEEIEYVHGDALHTLRNG

---

Other Tiling Screen Data from Ludwig, C.H. et al. 2023

HCoV-229E NSP2 (P0C6X1|PRO\_0000037294)

Gene: NSP2 ; Protein Family: NSP2

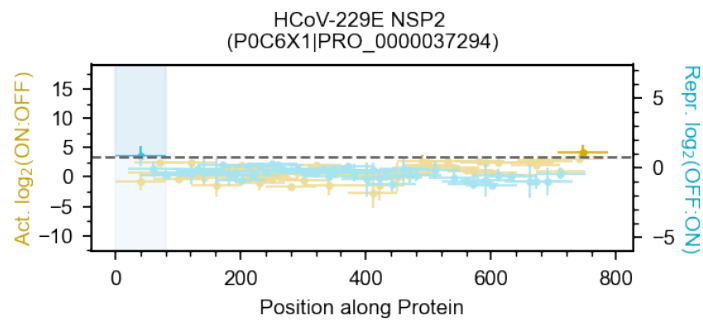

---

Extended repression domain from residues 1 to 80:

NVTYTDQYLCGADGKPVMSSEDLWQFVDHFGENEIIIINGHTYVCAWLTKRKPLDYKRQNNLAIEEIEYVHGDALHTLRNG

Max tile of repression domain from residues 1 to 80 (estimated 15.4% to 28.2% of cells repressed):

NVTYTDQYLCGADGKPVMSSEDLWQFVDHFGENEIIIINGHTYVCAWLTKRKPLDYKRQNNLAIEEIEYVHGDALHTLRNG

---

Other Tiling Screen Data from Ludwig, C.H. et al. 2023

HCoV-NL63 NSP2 (P0C6U6|PRO\_0000338232)

Gene: NSP2 ; Protein Family: NSP2

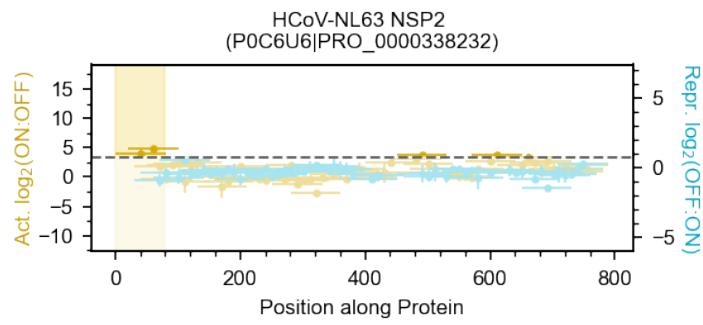

---

Extended activation domain from residues 1 to 80:

SVVFVDKYMCGFDGKPVLPKNMWEFRDYFNNNTDSIVIGGVTYQLAWDVIRKDLSEYQQNVLAIESIHYLGTGHTLKSG

Max tile of activation domain from residues 1 to 80 (estimated 16.9% to 30.9% of cells activated):

SVVFVDKYMCGFDGKPVLPKNMWEFRDYFNNNTDSIVIGGVTYQLAWDVIRKDLSEYQQNVLAIESIHYLGTGHTLKSG

---

Other Tiling Screen Data from Ludwig, C.H. et al. 2023

HCoV-NL63 NSP2 (P0C6X5|PRO\_0000283875)

Gene: NSP2 ; Protein Family: NSP2

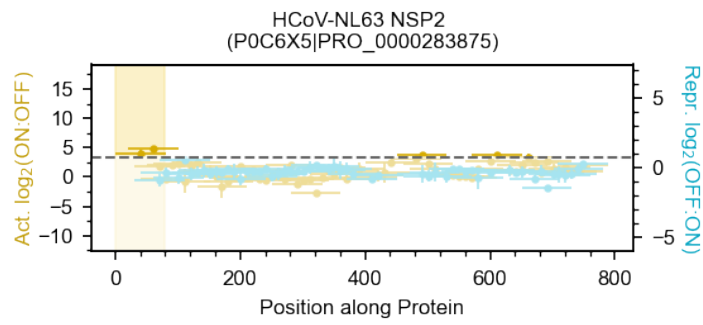

---

Extended activation domain from residues 1 to 80:

SVVFVDKYMCGFDGKPVLPKNMWEFRDYFNNNTDSIVIGGVTYQLAWDVIRKDLSEYQQNVLAIESIHLYLGTGHTLKSG

Max tile of activation domain from residues 1 to 80 (estimated 16.9% to 30.9% of cells activated):

SVVFVDKYMCGFDGKPVLPKNMWEFRDYFNNNTDSIVIGGVTYQLAWDVIRKDLSEYQQNVLAIESIHLYLGTGHTLKSG

---

Other Tiling Screen Data from Ludwig, C.H. et al. 2023

MERS-CoV NSP2 (K9N638|PRO\_0000422455)

Gene: NSP2 ; Protein Family: NSP2

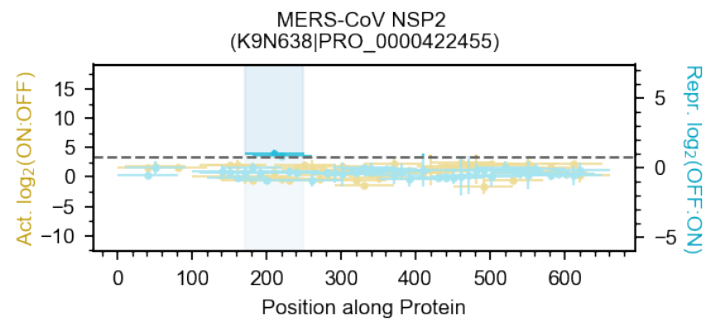

---

Extended repression domain from residues 171 to 260:

TANDVEVQSSGMIKPNALLCATCPFAKGDSCSSNCKHSVAQLVSYLSERCNVIADSKSFTLIFGGVAYAYFGCEEETMYFVPRAKSVVSR

Max tile of repression domain from residues 171 to 250 (estimated 18.0% to 23.6% of cells repressed):

TANDVEVQSSGMIKPNALLCATCPFAKGDSCSSNCKHSVAQLVSYLSERCNVIADSKSFTLIFGGVAYAYFGCEEETMYF

---



Other Tiling Screen Data from Ludwig, C.H. et al. 2023

MERS-CoV NSP2 (K9N7C7|PRO\_0000422440)

Gene: NSP2 ; Protein Family: NSP2

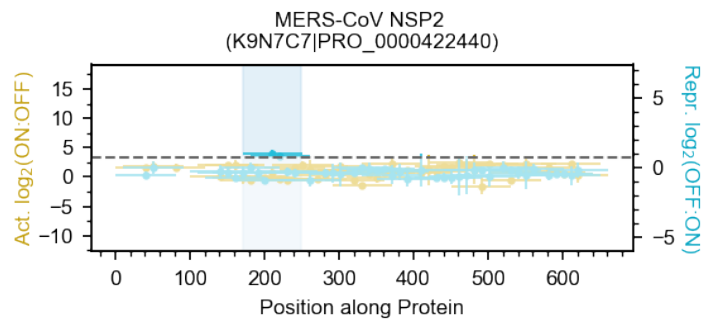

---

Extended repression domain from residues 171 to 260:

TANDVEVQSSGMIKPNALLCATCPFAKGDSCSSNCKHSVAQLVSYLSERCNVIADSKSFTLIFGGVAYAYFGCEEETMYFVPRAKSVVSR

Max tile of repression domain from residues 171 to 250 (estimated 18.0% to 23.6% of cells repressed):

TANDVEVQSSGMIKPNALLCATCPFAKGDSCSSNCKHSVAQLVSYLSERCNVIADSKSFTLIFGGVAYAYFGCEEETMYF

---

Other Tiling Screen Data from Ludwig, C.H. et al. 2023

SARS-CoV NSP2 (P0C6U8|PRO\_0000338256)

Gene: NSP2 ; Protein Family: NSP2

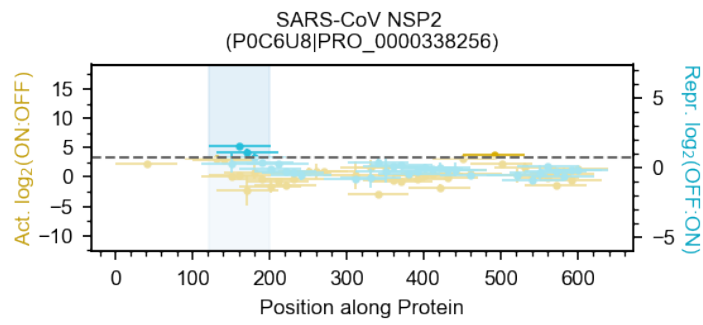

---

Extended repression domain from residues 121 to 220:

RSVYPVASPQECNNMHLSTLMKCNHCDEVSWQTCDFLKATCEHCGTENLVIEGPTTCGYLPTNAVVKMPCPACQDPEIGPEHSVADYHNHSNIETRLR  
KG

Max tile of repression domain from residues 121 to 200 (estimated 27.8% to 28.6% of cells repressed):

RSVYPVASPQECNNMHLSTLMKCNHCDEVSWQTCDFLKATCEHCGTENLVIEGPTTCGYLPTNAVVKMPCPACQDPEIGP

---

Other Tiling Screen Data from Ludwig, C.H. et al. 2023

SARS-CoV NSP2 (P0C6X7|PRO\_0000037310)

Gene: NSP2 ; Protein Family: NSP2

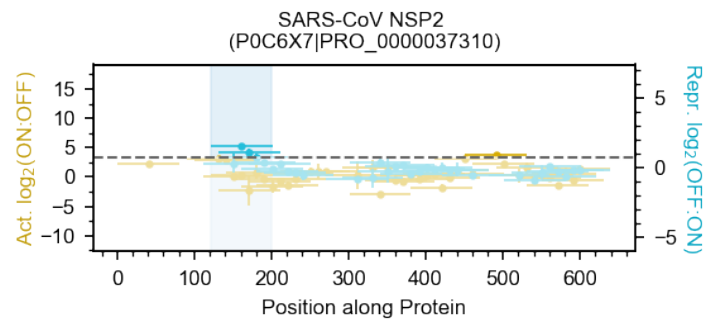

---

Extended repression domain from residues 121 to 220:

RSVYPVASPQECNNMHLSTLMKCNHCDEVSWQTCDFLKATCEHCGTENLVIEGPTTCGYLPTNAVVKMPCPACQDPEIGPEHSVADYHNHSNIETRLR  
KG

Max tile of repression domain from residues 121 to 200 (estimated 27.8% to 28.6% of cells repressed):

RSVYPVASPQECNNMHLSTLMKCNHCDEVSWQTCDFLKATCEHCGTENLVIEGPTTCGYLPTNAVVKMPCPACQDPEIGP

---

Other Tiling Screen Data from Ludwig, C.H. et al. 2023

BtCoV-HKU3 NSP3 (P0C6F8|PRO\_0000338077)

Gene: NSP3 ; Protein Family: NSP3

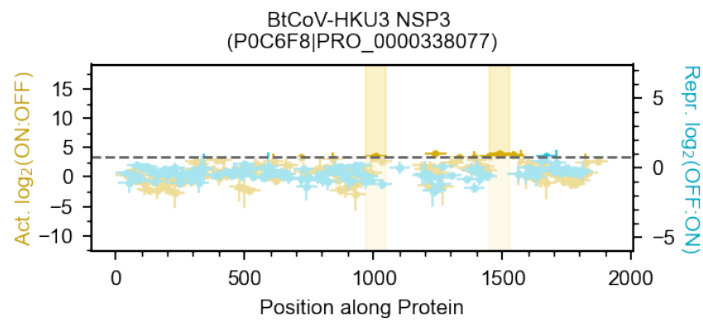

---

Extended activation domain from residues 1441 to 1530:

CSVCLSGLDSDLSPALETIQVTISSYKLDLTFGLGLAAEWLLAYMLFTKFFYLLGLSAIMQAFFGYFASHFISNSWLMWFIISIVQMAPV

Max tile of activation domain from residues 1451 to 1530 (estimated 17.7% to 25.2% of cells activated):

LDSYPALETIQVTISSYKLDLTFGLGLAAEWLLAYMLFTKFFYLLGLSAIMQAFFGYFASHFISNSWLMWFIISIVQMAPV

---

Extended activation domain from residues 961 to 1050:

SAPPAEYKLQGGAFLCANEYTGNYQCGHYTHITAKETLYRVDGAHLTKMSEYKGPVTDVIFYKETSYYTAAIKPVSYKLDGVTYTEIEPKLD

Max tile of activation domain from residues 971 to 1050 (estimated 15.4% to 18.5% of cells activated):

QGAFLCANEYTGNYQCGHYTHITAKETLYRVDGAHLTKMSEYKGPVTDVIFYKETSYYTAAIKPVSYKLDGVTYTEIEPKLD

---

Other Tiling Screen Data from Ludwig, C.H. et al. 2023

BtCoV-HKU3 NSP3 (P0C6W2|PRO\_0000291337)

Gene: NSP3 ; Protein Family: NSP3

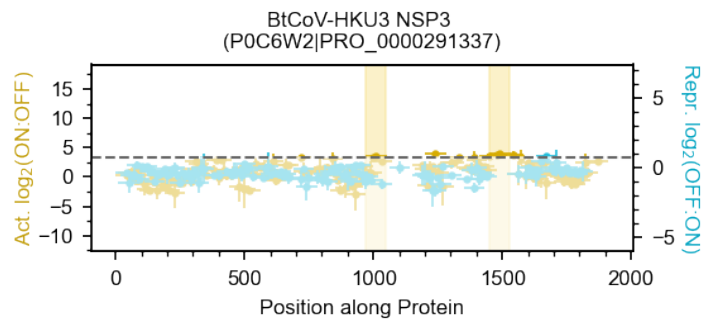

---

Extended activation domain from residues 1441 to 1530:

CSVCLSGLDSDLSPALETIQVTISSYKLDLTFGLGLAAEWLLAYMLFTKFFYLLGLSAIMQAFFGYFASHFISNSWLMWFIISIVQMAPV

Max tile of activation domain from residues 1451 to 1530 (estimated 17.7% to 25.2% of cells activated):

LDSYPALETIQVTISSYKLDLTFGLGLAAEWLLAYMLFTKFFYLLGLSAIMQAFFGYFASHFISNSWLMWFIISIVQMAPV

---

Extended activation domain from residues 961 to 1050:

SAPPAEYKLQGGAFLCANEYTGNYQCGHYTHITAKETLYRVDGAHLTKMSEYKGPVTDVIFYKETSYYTAAIKPVSYKLDGVTYTEIEPKLD

Max tile of activation domain from residues 971 to 1050 (estimated 15.4% to 18.5% of cells activated):

QGAFLCANEYTGNYQCGHYTHITAKETLYRVDGAHLTKMSEYKGPVTDVIFYKETSYYTAAIKPVSYKLDGVTYTEIEPKLD

---

Other Tiling Screen Data from Ludwig, C.H. et al. 2023

BtCoV-RaTG13 NSP3 (A0A6B9WIQ1|PRO\_0000449621)

Gene: NSP3 ; Protein Family: NSP3

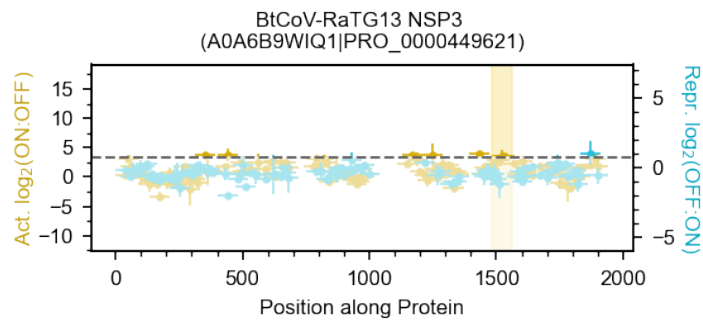

---

Extended activation domain from residues 1481 to 1570:

TYPSELETIQITISSFKWDLTAFGLVAEWFLAYILFTRFFYVLGLAAIMQLFFSYFAVHFISNSWLMWLIINLVQMAPISAMVRMYIFFAS

Max tile of activation domain from residues 1481 to 1560 (estimated 8.3% to 30.0% of cells activated):

TYPSELETIQITISSFKWDLTAFGLVAEWFLAYILFTRFFYVLGLAAIMQLFFSYFAVHFISNSWLMWLIINLVQMAPISA

---

Other Tiling Screen Data from Ludwig, C.H. et al. 2023

HCoV-229E NSP3 (P0C6U2|PRO\_0000338185)

Gene: NSP3 ; Protein Family: NSP3

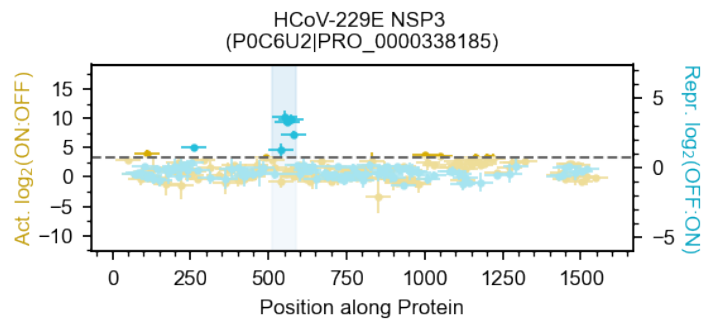

---

Extended repression domain from residues 501 to 620:

KLETSLEVLDDVCNTKEVKVFVYTDTEVCKVKDFVSGLVNVQKVEQPKIEPKPVSIVKVPKPYRVDGKFSYFTEDLLCVADDKPIVLF TDSMLTLDDRGL  
ALDNALSGVLSAAIKDCVD

Max tile of repression domain from residues 511 to 590 (estimated 72.3% to 93.4% of cells repressed):

DVCNTKEVKVFVYTDTEVCKVKDFVSGLVNVQKVEQPKIEPKPVSIVKVPKPYRVDGKFSYFTEDLLCVADDKPIVLF T

---

Other Tiling Screen Data from Ludwig, C.H. et al. 2023

HCoV-229E NSP3 (P0C6X1|PRO\_0000037295)

Gene: NSP3 ; Protein Family: NSP3

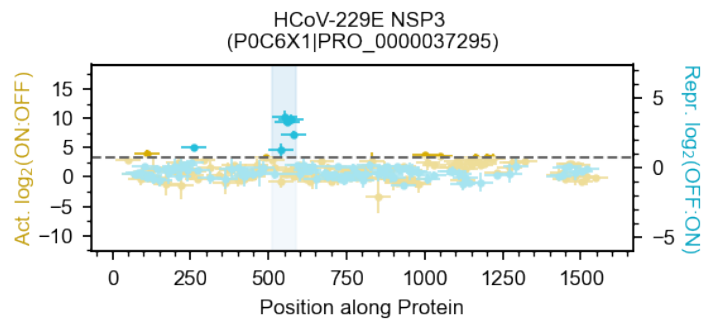

---

Extended repression domain from residues 501 to 620:

KLETSLEVLDDVCNTKEVKVFVYTDTEVCKVKDFVSGLVNVQKVEQPKIEPKPVSIVKVPKPYRVDGKFSYFTEDLLCVADDKPIVLF TDSMLTLDDRGL  
ALDNALSGVLSAAIKDCVD

Max tile of repression domain from residues 511 to 590 (estimated 72.3% to 93.4% of cells repressed):

DVCNTKEVKVFVYTDTEVCKVKDFVSGLVNVQKVEQPKIEPKPVSIVKVPKPYRVDGKFSYFTEDLLCVADDKPIVLF T

---



Other Tiling Screen Data from Ludwig, C.H. et al. 2023

HCoV-HKU1-N1 NSP3 (POC6U3|PRO\_0000338197)

Gene: NSP3 ; Protein Family: NSP3

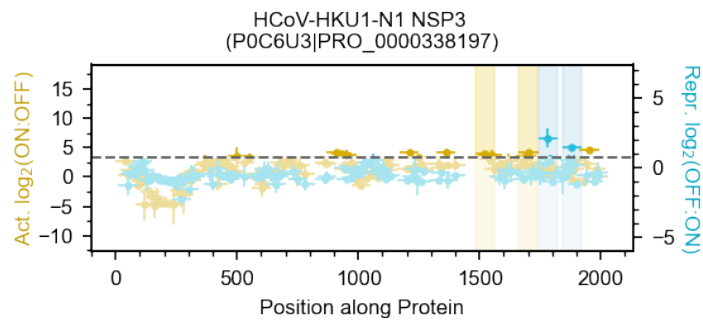

---

Extended activation domain from residues 1651 to 1740:

YIVVTAMYKVVGFIRHIVYGCNKAGCLFCYKRNCSVRVKCSTIVGGVIRYYDITANGGTGFCVKHQWNCFNCHSFKPGNTFITVEAAIEL

Max tile of activation domain from residues 1661 to 1740 (estimated 18.3% to 32.1% of cells activated):

VGfirhivYGCNKAGCLFCYKRNCSVRVKCSTIVGGVIRYYDITANGGTGFCVKHQWNCFNCHSFKPGNTFITVEAAIEL

---

Extended activation domain from residues 1481 to 1570:

VATVFLWFNFLYINVIFSDFYLPNISVFPIFVGRIVMWIKATFGLVTICDFYSKLGVGFTSHFCNGSFICELCHSGFDMLDTYAAIDFV

Max tile of activation domain from residues 1481 to 1560 (estimated 21.5% to 21.5% of cells activated):

VATVFLWFNFLYINVIFSDFYLPNISVFPIFVGRIVMWIKATFGLVTICDFYSKLGVGFTSHFCNGSFICELCHSGFDM

---

Extended repression domain from residues 1741 to 1830:

SKELKRPVNPTDASHYVVDIKQVGCMMRLFYDRDGQRVYDDVDASLFDINLLHSKVKVVPNLYVVVVEDADRANFLNAVVFYAQSL

Max tile of repression domain from residues 1741 to 1820 (estimated 26.0% to 63.7% of cells repressed):

SKELKRPVNPTDASHYVVDIKQVGCMMRLFYDRDGQRVYDDVDASLFDINLLHSKVKVVPNLYVVVVEDADRANFL

---

Extended repression domain from residues 1831 to 1920:

YRPILLVDKLLITTACNGISVTQTMFDVYVDTFMSHFDVDRKSFNNFVNIAHASLREGVQLEKVLDTFVGCVRKCCSIDSDVETRFITKS

Max tile of repression domain from residues 1841 to 1920 (estimated 26.2% to 27.1% of cells repressed):

LITTACNGISVTQTMFDVYVDTFMSHFDVDRKSFNNFVNIAHASLREGVQLEKVLDTFVGCVRKCCSIDSDVETRFITKS

---

HCoV-HKU1-N1 NSP3 (P0C6X2|PRO\_5000093335)

Gene: NSP3 ; Protein Family: NSP3

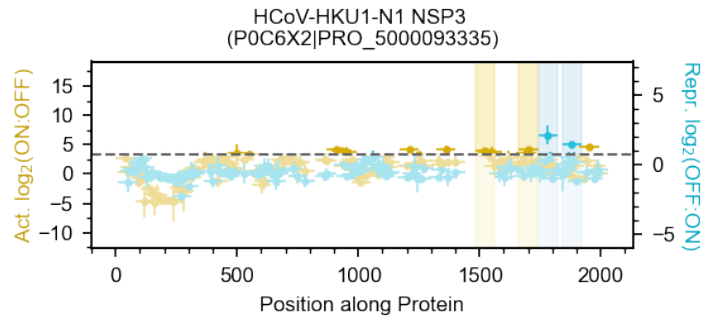

---

Extended activation domain from residues 1651 to 1740:

YIVVTAMYKVVGFIRHIVYGCNKAGCLFCYKRNCSVRVKCSTIVGGVIRYYDITANGGTGFCVKHQWNCFNCHSFKPGNTFITVEAAIEL

Max tile of activation domain from residues 1661 to 1740 (estimated 18.3% to 32.1% of cells activated):

VGFIHIVYGCNKAGCLFCYKRNCSVRVKCSTIVGGVIRYYDITANGGTGFCVKHQWNCFNCHSFKPGNTFITVEAAIEL

---

Extended activation domain from residues 1481 to 1570:

VATVFLWFNFLYINVIFSDFYLPNISVFPIFVGRIVMWIKATFGLVTICDFYSKLGVGFTSHFCNGSFICELCHSGFDMLDTYAAIDFV

Max tile of activation domain from residues 1481 to 1560 (estimated 21.5% to 21.5% of cells activated):

VATVFLWFNFLYINVIFSDFYLPNISVFPIFVGRIVMWIKATFGLVTICDFYSKLGVGFTSHFCNGSFICELCHSGFDM

---

Extended repression domain from residues 1741 to 1830:

SKELKRPVNPTDASHYVVDIKQVGCMMRLFYDRDGQRVYDDVDASLFDINLLHSKVKVVPNLYVVVVESDADRANFLNAVVFYAQSL

Max tile of repression domain from residues 1741 to 1820 (estimated 26.0% to 63.7% of cells repressed):

SKELKRPVNPTDASHYVVDIKQVGCMMRLFYDRDGQRVYDDVDASLFDINLLHSKVKVVPNLYVVVVESDADRANFL

---

Extended repression domain from residues 1831 to 1920:

YRPILLVDKLLITTACNGISVTQTMFDVYVDTFMSHFDVDRKSFNNFVNIAHASLREGVQLEKVLDTFVGCVRKCCSIDSDVETRFITKS

Max tile of repression domain from residues 1841 to 1920 (estimated 26.2% to 27.1% of cells repressed):

LITTACNGISVTQTMFDVYVDTFMSHFDVDRKSFNNFVNIAHASLREGVQLEKVLDTFVGCVRKCCSIDSDVETRFITKS

---

Other Tiling Screen Data from Ludwig, C.H. et al. 2023

HCoV-HKU1-N2 NSP3 (POC6U4|PRO\_0000338209)

Gene: NSP3 ; Protein Family: NSP3

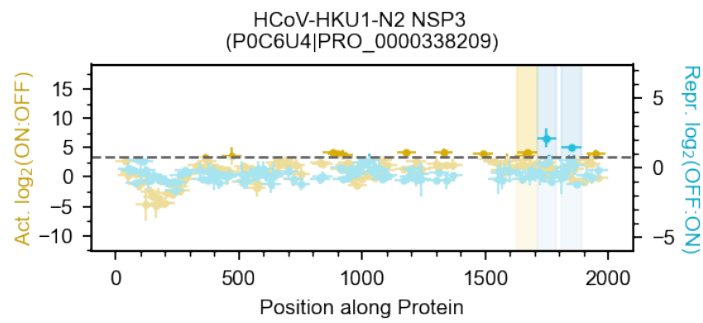

---

Extended activation domain from residues 1621 to 1710:

YIVVTAMYKVVGFIRHIVYGCNKAGCLFCYKRNC SVRVK CSTIVGGVIRYYDITANGGTGFCVKHQWNC FNCHSFKPGNTFITVEAAIEL

Max tile of activation domain from residues 1631 to 1710 (estimated 18.3% to 32.1% of cells activated):

VG FIRHIVYGCNKAGCLFCYKRNC SVRVK CSTIVGGVIRYYDITANGGTGFCVKHQWNC FNCHSFKPGNTFITVEAAIEL

---

Extended repression domain from residues 1711 to 1800:

SKELKRPVNPTDASHYVVDIKQVGCMMRLFYDRDGQRVYDDVDASL FVDINLLHSKVK VV PNL YVVV VESDADRANFLNAVVFYAQSL

Max tile of repression domain from residues 1711 to 1790 (estimated 26.0% to 63.7% of cells repressed):

SKELKRPVNPTDASHYVVDIKQVGCMMRLFYDRDGQRVYDDVDASL FVDINLLHSKVK VV PNL YVVV VESDADRANFL

---

Extended repression domain from residues 1801 to 1890:

YRPILLVDKKLITTACNGISVTQTMFDVYVDTFMSHFDVDRKSFNNFNIAHASLREGVQLEKVLDTFVGCVRKCCSIDSDVETRFITKS

Max tile of repression domain from residues 1811 to 1890 (estimated 26.2% to 27.1% of cells repressed):

LITTACNGISVTQTMFDVYVDTFMSHFDVDRKSFNNFNIAHASLREGVQLEKVLDTFVGCVRKCCSIDSDVETRFITKS

---

Other Tiling Screen Data from Ludwig, C.H. et al. 2023

HCoV-HKU1-N2 NSP3 (P0C6X3|PRO\_0000297775)

Gene: NSP3 ; Protein Family: NSP3

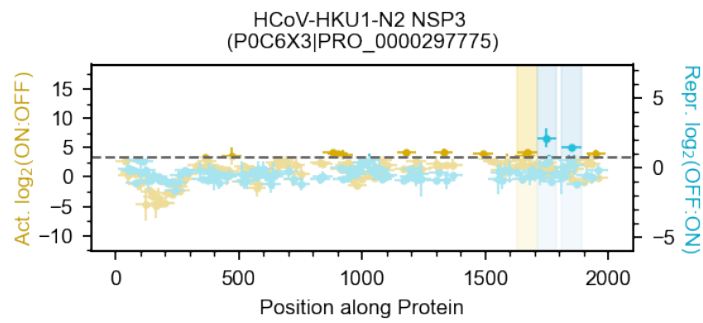

---

Extended activation domain from residues 1621 to 1710:

YIVVTAMYKVVGFIRHIVYGCNKAGCLFCYKRNC SVRVK CSTIVGGVIRYYDITANGGTGFCVKHQWNC FNCHSFKPGNTFITVEAAIEL

Max tile of activation domain from residues 1631 to 1710 (estimated 18.3% to 32.1% of cells activated):

VG FIRHIVYGCNKAGCLFCYKRNC SVRVK CSTIVGGVIRYYDITANGGTGFCVKHQWNC FNCHSFKPGNTFITVEAAIEL

---

Extended repression domain from residues 1711 to 1800:

SKELKRPVNPTDASHYVVDIKQVGCMMRLFYDRDGQRVYDDVDASL FVDINLLHSKV KVVPNLYVVVVESDADRANFLNAVVFYAQSL

Max tile of repression domain from residues 1711 to 1790 (estimated 26.0% to 63.7% of cells repressed):

SKELKRPVNPTDASHYVVDIKQVGCMMRLFYDRDGQRVYDDVDASL FVDINLLHSKV KVVPNLYVVVVESDADRANFL

---

Extended repression domain from residues 1801 to 1890:

YRPILLVDKKLITTACNGISVTQTMFDVYVDTFMSHFDVDRKSFNNFVNIAHASLREGVQLEKVLDTFVGCVRKCCSIDSDVETRFITKS

Max tile of repression domain from residues 1811 to 1890 (estimated 26.2% to 27.1% of cells repressed):

LITTACNGISVTQTMFDVYVDTFMSHFDVDRKSFNNFVNIAHASLREGVQLEKVLDTFVGCVRKCCSIDSDVETRFITKS

---

Other Tiling Screen Data from Ludwig, C.H. et al. 2023

HCoV-HKU1-N5 NSP3 (POC6U5|PRO\_0000338221)

Gene: NSP3 ; Protein Family: NSP3

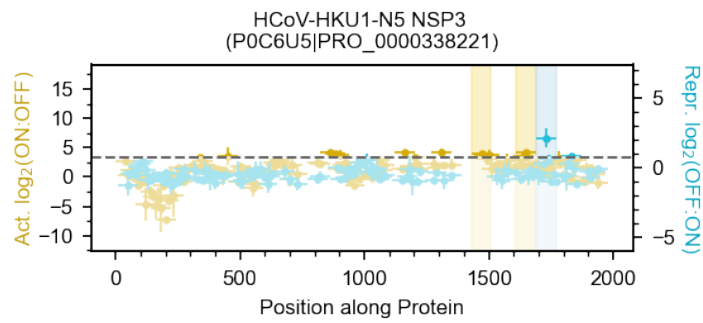

---

Extended activation domain from residues 1601 to 1690:

YIVVTAMYKVVGFIRHIVYGCNKAGCLFCYKRNC SVRVK CSTIVGGVIRYYDITANGGTGFCVKHQWNC FNCHSFKPGNTFITVEAAIEL

Max tile of activation domain from residues 1611 to 1690 (estimated 18.3% to 32.1% of cells activated):

VG FIRHIVYGCNKAGCLFCYKRNC SVRVK CSTIVGGVIRYYDITANGGTGFCVKHQWNC FNCHSFKPGNTFITVEAAIEL

---

Extended activation domain from residues 1431 to 1520:

VATVFLFWFNFLYINVIFSDFYLPNISVFPIFVGRIVMWIKATFGLVTICDFYSKLGVGFTSHFCNGSFICELCHSGFDMLDTYAAIDFV

Max tile of activation domain from residues 1431 to 1510 (estimated 21.5% to 21.5% of cells activated):

VATVFLFWFNFLYINVIFSDFYLPNISVFPIFVGRIVMWIKATFGLVTICDFYSKLGVGFTSHFCNGSFICELCHSGFDM

---

Extended repression domain from residues 1691 to 1780:

SKELKRPVNPTDASHYVVDIKQVGCMMRLFYDRDGQRVYDDVDASLFDINLLHSKVKVVPNLYVVVVESDADRANFLNAVVFYAQSL

Max tile of repression domain from residues 1691 to 1770 (estimated 26.0% to 63.7% of cells repressed):

SKELKRPVNPTDASHYVVDIKQVGCMMRLFYDRDGQRVYDDVDASLFDINLLHSKVKVVPNLYVVVVESDADRANFL

---

Other Tiling Screen Data from Ludwig, C.H. et al. 2023

HCoV-HKU1-N5 NSP3 (P0C6X4|PRO\_0000297790)

Gene: NSP3 ; Protein Family: NSP3

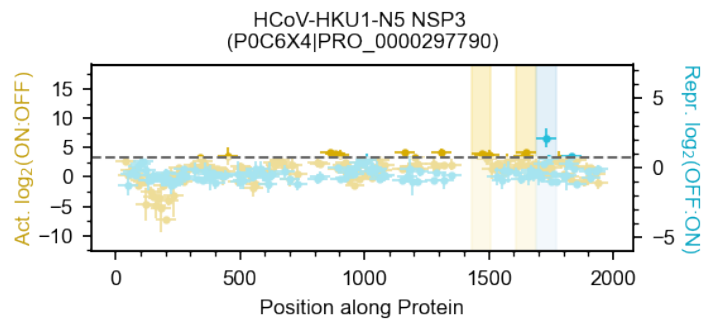

---

Extended activation domain from residues 1601 to 1690:

YIVVTAMYKVVGFIRHIVYGCNKAGCLFCYKRNC SVRVK CSTIVGGVIRYYDITANGGTGFCVKHQWNC FNCHSFKPGNTFITVEAAIEL

Max tile of activation domain from residues 1611 to 1690 (estimated 18.3% to 32.1% of cells activated):

VG FIRHIVYGCNKAGCLFCYKRNC SVRVK CSTIVGGVIRYYDITANGGTGFCVKHQWNC FNCHSFKPGNTFITVEAAIEL

---

Extended activation domain from residues 1431 to 1520:

VATVFLWFNFLYINVIFSDFYLPNISVFPIFVGRIVMWIKATFGLVTICDFYSKLGVGFTSHFCNGSFICELCHSGFDMLDTYAAIDFV

Max tile of activation domain from residues 1431 to 1510 (estimated 21.5% to 21.5% of cells activated):

VATVFLWFNFLYINVIFSDFYLPNISVFPIFVGRIVMWIKATFGLVTICDFYSKLGVGFTSHFCNGSFICELCHSGFDM

---

Extended repression domain from residues 1691 to 1780:

SKELKRPVNPTDASHYVVDIKQVGCMMRLFYDRDGQRVYDDVDASLFDINLLHSKVKVVPNLYVVVVESDADRANFLNAVVFYAQSL

Max tile of repression domain from residues 1691 to 1770 (estimated 26.0% to 63.7% of cells repressed):

SKELKRPVNPTDASHYVVDIKQVGCMMRLFYDRDGQRVYDDVDASLFDINLLHSKVKVVPNLYVVVVESDADRANFL

---

Other Tiling Screen Data from Ludwig, C.H. et al. 2023

HCoV-NL63 NSP3 (P0C6U6|PRO\_0000338233)

Gene: NSP3 ; Protein Family: NSP3

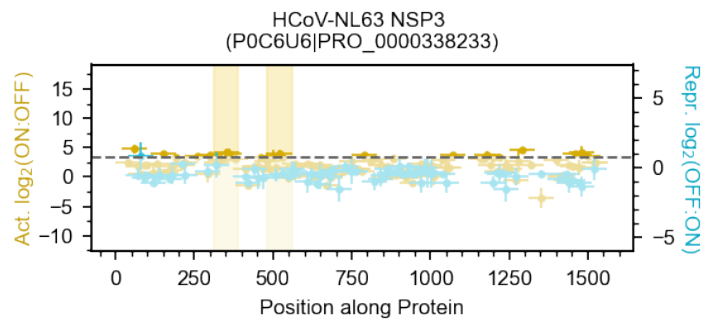

---

Extended activation domain from residues 311 to 400:

GSGHYQTNLVYFNKAIDGFGVFDIKNSSVNTVCFVDVDFHSVEIEAGEVKPFAVYKNVKFYLGDISHLVNCVSFDFVVNAANENLLHGGG

Max tile of activation domain from residues 311 to 390 (estimated 17.3% to 35.0% of cells activated):

GSGHYQTNLVYFNKAIDGFGVFDIKNSSVNTVCFVDVDFHSVEIEAGEVKPFAVYKNVKFYLGDISHLVNCVSFDFVVNA

---

Extended activation domain from residues 481 to 570:

IFGVRIENSLKALFSCDINKPLQVFVYSSNEEQAVLKFLDGLDLPVIDDVDVVKPFRVEGNFSFFDCGVNALDGDIIYLLFTNSILMLDK

Max tile of activation domain from residues 481 to 560 (estimated 13.5% to 31.3% of cells activated):

IFGVRIENSLKALFSCDINKPLQVFVYSSNEEQAVLKFLDGLDLPVIDDVDVVKPFRVEGNFSFFDCGVNALDGDIIYLL

---

Other Tiling Screen Data from Ludwig, C.H. et al. 2023

HCoV-NL63 NSP3 (P0C6X5|PRO\_0000283876)

Gene: NSP3 ; Protein Family: NSP3

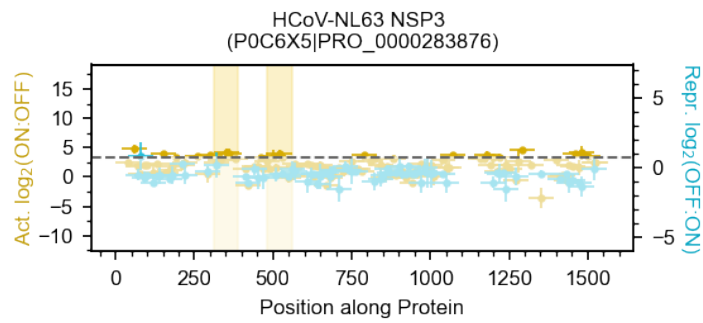

---

Extended activation domain from residues 311 to 400:

GSGHYQTNLYSFNKAIDGFGVFDIKNSSVNTVCFVDVDFHSVEIEAGEVKPFAVYKNVKFYLGDISHLVNCVSFDFVVNAANENLLHGGG

Max tile of activation domain from residues 311 to 390 (estimated 17.3% to 35.0% of cells activated):

GSGHYQTNLYSFNKAIDGFGVFDIKNSSVNTVCFVDVDFHSVEIEAGEVKPFAVYKNVKFYLGDISHLVNCVSFDFVVNA

---

Extended activation domain from residues 481 to 570:

IFGVRIENSLKALFSCDINKPLQVFVYSSNEEQAVLKFLDGLDLPVIDDVDVVKPFRVEGNFSFFDCGVNALDGDIIYLLFTNSILMLDK

Max tile of activation domain from residues 481 to 560 (estimated 13.5% to 31.3% of cells activated):

IFGVRIENSLKALFSCDINKPLQVFVYSSNEEQAVLKFLDGLDLPVIDDVDVVKPFRVEGNFSFFDCGVNALDGDIIYLL

---



Other Tiling Screen Data from Ludwig, C.H. et al. 2023

HCoV-OC43 NSP3 (P0C6U7|PRO\_0000338245)

Gene: NSP3 ; Protein Family: NSP3

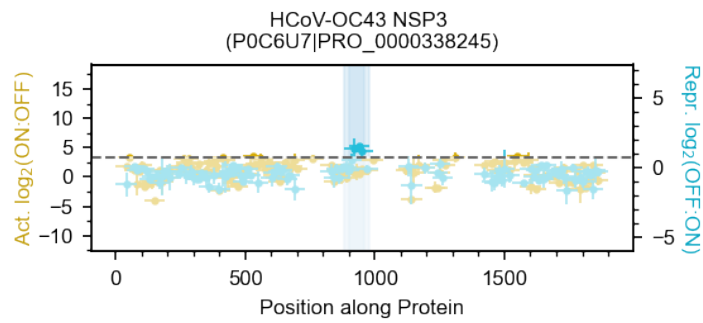

---

Extended repression domain from residues 901 to 990:

GVKQEVRTGLDAVMHFGTSLREDLEIGYTVDCSCGKKLIHCVRFDVPFLICSNTPASVKLPKGVGSANIFIGDNVGHYVHVKCEQSYQLY

Max tile of repression domain from residues 901 to 980 (estimated 24.0% to 32.4% of cells repressed):

GVKQEVRTGLDAVMHFGTSLREDLEIGYTVDCSCGKKLIHCVRFDVPFLICSNTPASVKLPKGVGSANIFIGDNVGHYVH

---

Extended repression domain from residues 871 to 960:

PADSRDFLRVVFVQVSLTGAICDFEIAACKCGVKQEVRTGLDAVMHFGTSLREDLEIGYTVDCSCGKKLIHCVRFDVPFLICSNTPASVKL

Max tile of repression domain from residues 881 to 960 (estimated 18.1% to 40.2% of cells repressed):

VFSQVSLTGAICDFEIAACKCGVKQEVRTGLDAVMHFGTSLREDLEIGYTVDCSCGKKLIHCVRFDVPFLICSNTPASVKL

---

Other Tiling Screen Data from Ludwig, C.H. et al. 2023

HCoV-OC43 NSP3 (P0C6X6|PRO\_0000283828)

Gene: NSP3 ; Protein Family: NSP3

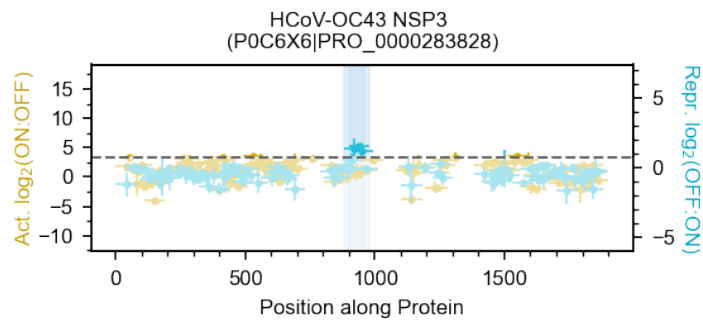

---

Extended repression domain from residues 901 to 990:

GVKQEVRTGLDAVMHFGTSLREDLEIGYTVDCSCGKKLIHCVRFDVPFLICSNTPASVKLPKGVGSANIFIGDNVGHYVHVKCEQSYQLY

Max tile of repression domain from residues 901 to 980 (estimated 24.0% to 32.4% of cells repressed):

GVKQEVRTGLDAVMHFGTSLREDLEIGYTVDCSCGKKLIHCVRFDVPFLICSNTPASVKLPKGVGSANIFIGDNVGHYVH

---

Extended repression domain from residues 871 to 960:

PADSRDFLRVFSQVDLTGAICDFEIAACKGVKQEVRTGLDAVMHFGTSLREDLEIGYTVDCSCGKKLIHCVRFDVPFLICSNTPASVKL

Max tile of repression domain from residues 881 to 960 (estimated 18.1% to 40.2% of cells repressed):

VFSQVDLTGAICDFEIAACKGVKQEVRTGLDAVMHFGTSLREDLEIGYTVDCSCGKKLIHCVRFDVPFLICSNTPASVKL

---

Other Tiling Screen Data from Ludwig, C.H. et al. 2023

SARS-CoV NSP3 (P0C6U8|PRO\_0000338257)

Gene: NSP3 ; Protein Family: NSP3

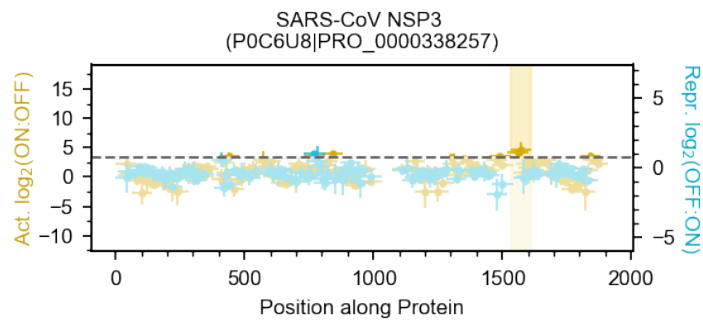

---

Extended activation domain from residues 1521 to 1610:

SWLMWFIISIVQMAPVSAMVRMYIFFASFYIWKSYVHIMDGCTSSTCMMCYKRNTRVECTTIVNGMKRSFYVYANGGRGFCKTHNWN

Max tile of activation domain from residues 1531 to 1610 (estimated 12.6% to 56.1% of cells activated):

VQMAPVSAMVRMYIFFASFYIWKSYVHIMDGCTSSTCMMCYKRNTRVECTTIVNGMKRSFYVYANGGRGFCKTHNWN

---

Other Tiling Screen Data from Ludwig, C.H. et al. 2023

SARS-CoV NSP3 (P0C6X7|PRO\_0000037311)

Gene: NSP3 ; Protein Family: NSP3

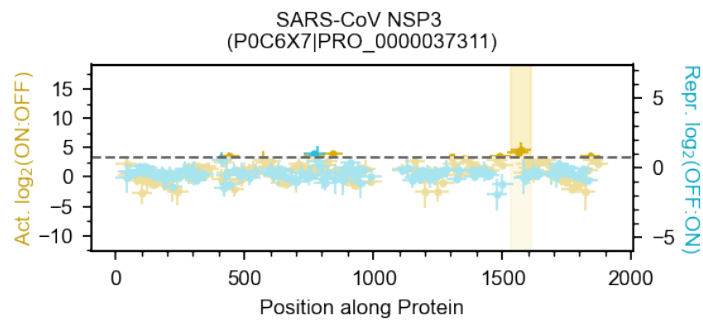

---

Extended activation domain from residues 1521 to 1610:

SWLMWFIISIVQMAPVSAMVRMYIFFASFYIWKSYVHIMDGCTSSTCMMCYKRNTRVECTTIVNGMKRSFYVYANGGRGFCKTHNWN

Max tile of activation domain from residues 1531 to 1610 (estimated 12.6% to 56.1% of cells activated):

VQMAPVSAMVRMYIFFASFYIWKSYVHIMDGCTSSTCMMCYKRNTRVECTTIVNGMKRSFYVYANGGRGFCKTHNWN

---

Other Tiling Screen Data from Ludwig, C.H. et al. 2023

BtCoV-HKU3 NSP4 (P0C6F8|PRO\_0000338078)

Gene: NSP4 ; Protein Family: NSP4

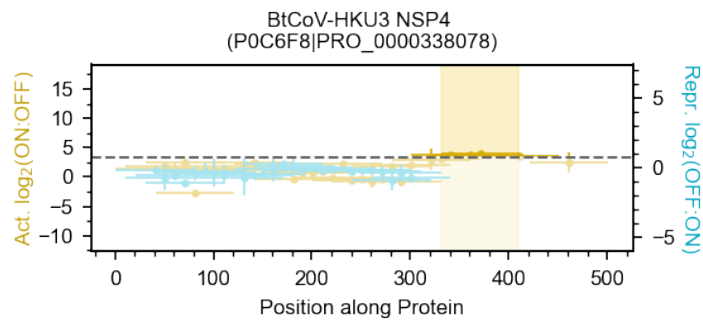

---

Extended activation domain from residues 321 to 410:

LFLMSFTILCLAPAYSFLPGVYSIFYLYLTFYFTNDVSFLAHLQWFAMFSPVPPFWITAIYVFCISLKHFWFFSNYLKKRVMFNGVTFS

Max tile of activation domain from residues 331 to 410 (estimated 18.6% to 24.8% of cells activated):

LAPAYSFLPGVYSIFYLYLTFYFTNDVSFLAHLQWFAMFSPVPPFWITAIYVFCISLKHFWFFSNYLKKRVMFNGVTFS

---

Other Tiling Screen Data from Ludwig, C.H. et al. 2023

BtCoV-HKU3 NSP4 (P0C6W2|PRO\_0000291338)

Gene: NSP4 ; Protein Family: NSP4

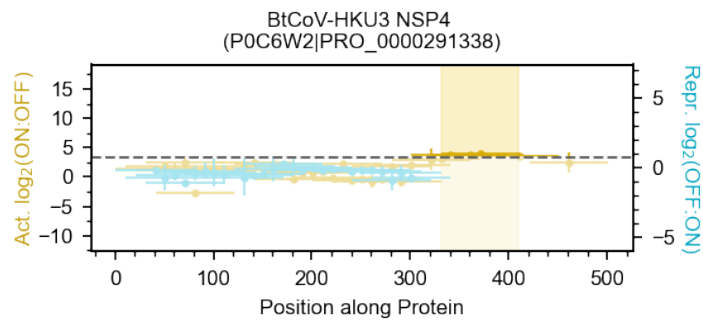

---

Extended activation domain from residues 321 to 410:

LFLMSFTILCLAPAYSFLPGVYSIFYLYLTFYFTNDVSFLAHLQWFAMFSPVPPFWITAIYVFCISLKHFWFFSNYLKKRVMFNGVTFS

Max tile of activation domain from residues 331 to 410 (estimated 18.6% to 24.8% of cells activated):

LAPAYSFLPGVYSIFYLYLTFYFTNDVSFLAHLQWFAMFSPVPPFWITAIYVFCISLKHFWFFSNYLKKRVMFNGVTFS

---

Other Tiling Screen Data from Ludwig, C.H. et al. 2023

BtCoV-RaTG13 NSP4 (A0A6B9WIQ1|PRO\_0000449622)

Gene: NSP4 ; Protein Family: NSP4

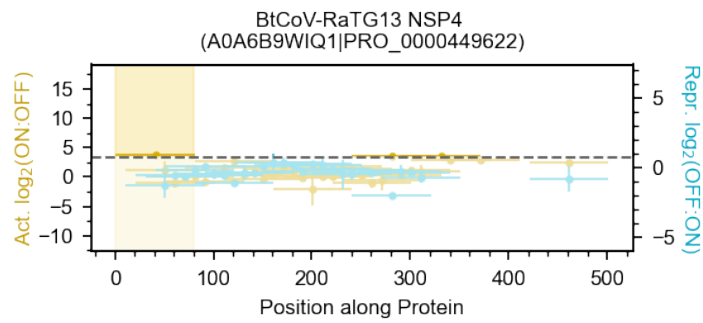

---

Extended activation domain from residues 1 to 80:

KIVNNWLKQLIKVTLVFLFVAAIFYLITPVHVMKHTDFSSEIIGYKAIDGGVTRDIASDTTCFANKHADFDTWFSQRGG

Max tile of activation domain from residues 1 to 80 (estimated 14.0% to 22.9% of cells activated):

KIVNNWLKQLIKVTLVFLFVAAIFYLITPVHVMKHTDFSSEIIGYKAIDGGVTRDIASDTTCFANKHADFDTWFSQRGG

---

Other Tiling Screen Data from Ludwig, C.H. et al. 2023

HCoV-HKU1-N1 NSP4 (POC6U3|PRO\_0000338198)

Gene: NSP4 ; Protein Family: NSP4

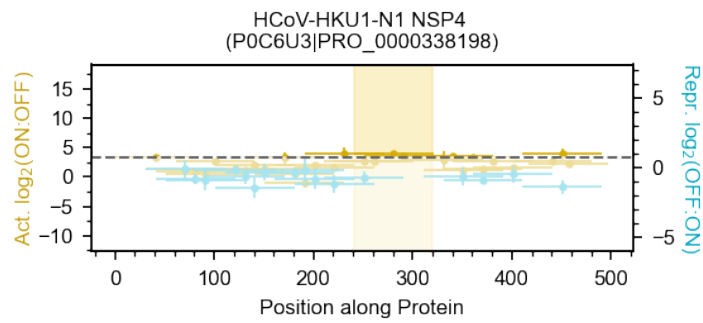

---

Extended activation domain from residues 241 to 330:

VLNNDYYRSMPTFCGRDLFDLFYQFFSSLIRPIDFFSLTASSIFGAILAIVVVLVFYYLIKLRKAFGDYTSVVVINVVVWCINFLMLFV

Max tile of activation domain from residues 241 to 320 (estimated 17.7% to 25.6% of cells activated):

VLNNDYYRSMPTFCGRDLFDLFYQFFSSLIRPIDFFSLTASSIFGAILAIVVVLVFYYLIKLRKAFGDYTSVVVINVVV

---



Other Tiling Screen Data from Ludwig, C.H. et al. 2023

HCoV-HKU1-N1 NSP4 (P0C6X2|PRO\_5000093336)

Gene: NSP4 ; Protein Family: NSP4

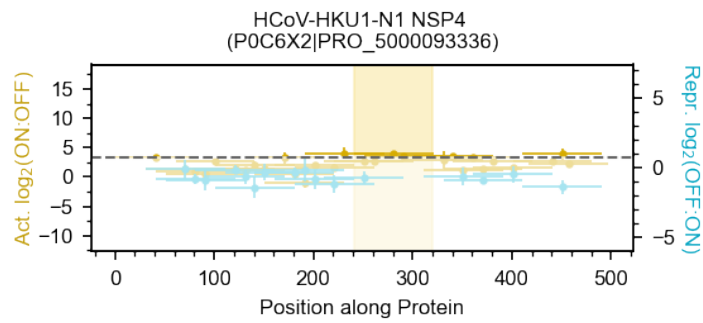

---

Extended activation domain from residues 241 to 330:

VLNNDYYRSMPTFCGRDLFDLFYQFFSSLIRPIDFFSLTASSIFGAILAIVVVLVFYYLIKLRKAFGDYTSVVVINVVVWCINFLMLFV

Max tile of activation domain from residues 241 to 320 (estimated 17.7% to 25.6% of cells activated):

VLNNDYYRSMPTFCGRDLFDLFYQFFSSLIRPIDFFSLTASSIFGAILAIVVVLVFYYLIKLRKAFGDYTSVVVINVVV

---

Other Tiling Screen Data from Ludwig, C.H. et al. 2023

HCoV-HKU1-N5 NSP4 (POC6U5|PRO\_0000338222)

Gene: NSP4 ; Protein Family: NSP4

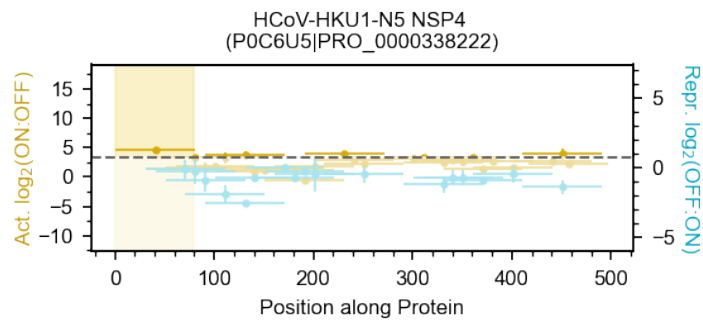

---

Extended activation domain from residues 1 to 80:

VVLSNLLYILFFISLICFILLWALLPTYSVYKSDIHLPAYASFKVIDNGVVRDISVNDLCFANKFFQFDQWYESTFGSVY

Max tile of activation domain from residues 1 to 80 (estimated 31.3% to 34.3% of cells activated):

VVLSNLLYILFFISLICFILLWALLPTYSVYKSDIHLPAYASFKVIDNGVVRDISVNDLCFANKFFQFDQWYESTFGSVY

---

Other Tiling Screen Data from Ludwig, C.H. et al. 2023

HCoV-HKU1-N5 NSP4 (P0C6X4|PRO\_0000297791)

Gene: NSP4 ; Protein Family: NSP4

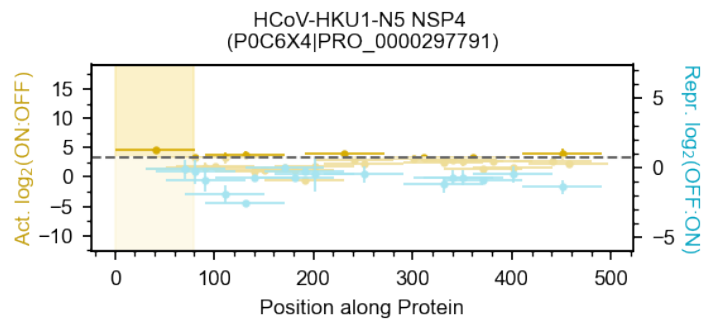

---

Extended activation domain from residues 1 to 80:

VVLSNLLYILFFISLICFILLWALLPTYSVYKSDIHLPAYASFKVIDNGVVRDISVNDLCFANKFFQFDQWYESTFGSVY

Max tile of activation domain from residues 1 to 80 (estimated 31.3% to 34.3% of cells activated):

VVLSNLLYILFFISLICFILLWALLPTYSVYKSDIHLPAYASFKVIDNGVVRDISVNDLCFANKFFQFDQWYESTFGSVY

---

Other Tiling Screen Data from Ludwig, C.H. et al. 2023

SARS-CoV-2 NSP4 (P0DTC1|PRO\_0000449638)

Gene: NSP4 ; Protein Family: NSP4

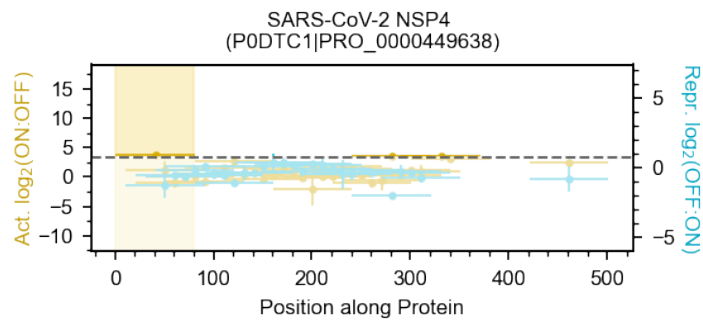

---

Extended activation domain from residues 1 to 80:

KIVNNWLKQLIKVTLVFLFVAAIFYLITPVHVMKHTDFSSEIIGYKAIDGGVTRDIASDTCTCFANKHADFDTWFSQRGG

Max tile of activation domain from residues 1 to 80 (estimated 14.0% to 22.9% of cells activated):

KIVNNWLKQLIKVTLVFLFVAAIFYLITPVHVMKHTDFSSEIIGYKAIDGGVTRDIASDTCTCFANKHADFDTWFSQRGG

---

Other Tiling Screen Data from Ludwig, C.H. et al. 2023

SARS-CoV-2 NSP4 (P0DTD1|PRO\_0000449622)

Gene: NSP4 ; Protein Family: NSP4

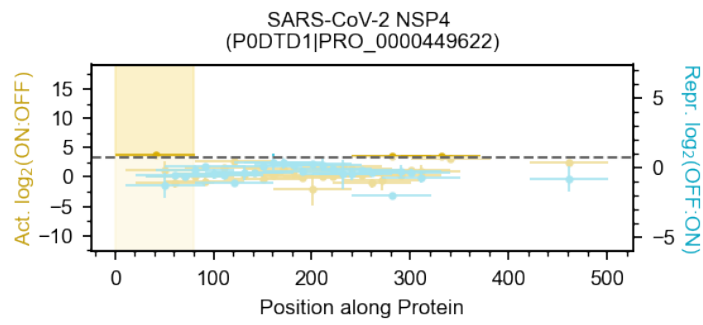

---

Extended activation domain from residues 1 to 80:

KIVNNWLKQLIKVTLVFLFVAAIFYLITPVHVMKHTDFSSEIIGYKAIDGGVTRDIASDTCTCFANKHADFDTWFSQRGG

Max tile of activation domain from residues 1 to 80 (estimated 14.0% to 22.9% of cells activated):

KIVNNWLKQLIKVTLVFLFVAAIFYLITPVHVMKHTDFSSEIIGYKAIDGGVTRDIASDTCTCFANKHADFDTWFSQRGG

---

Other Tiling Screen Data from Ludwig, C.H. et al. 2023

HCoV-HKU1-N1 NSP6 (POC6U3|PRO\_0000338200)

Gene: NSP6 ; Protein Family: NSP6

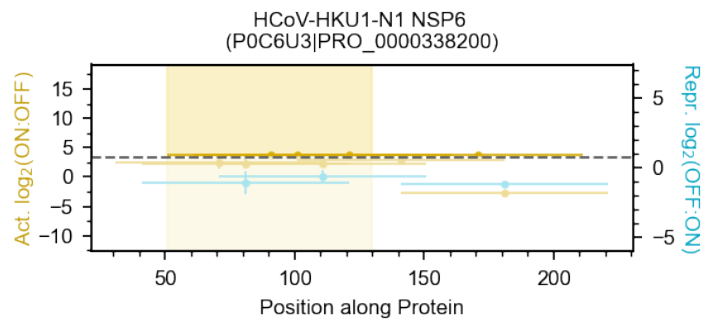

---

Extended activation domain from residues 51 to 140:

FVSFMMLLVKHKHFYLTMYIIPVLCTLFYVNYLVVYKEGFRGFTYVWLSYFVPAVNFTYVYEVFYGCILCVFAIFITMHSINHDIFSLMF

Max tile of activation domain from residues 51 to 130 (estimated 18.4% to 22.4% of cells activated):

FVSFMMLLVKHKHFYLTMYIIPVLCTLFYVNYLVVYKEGFRGFTYVWLSYFVPAVNFTYVYEVFYGCILCVFAIFITMHS

---

Other Tiling Screen Data from Ludwig, C.H. et al. 2023

HCoV-HKU1-N1 NSP6 (P0C6X2|PRO\_5000093338)

Gene: NSP6 ; Protein Family: NSP6

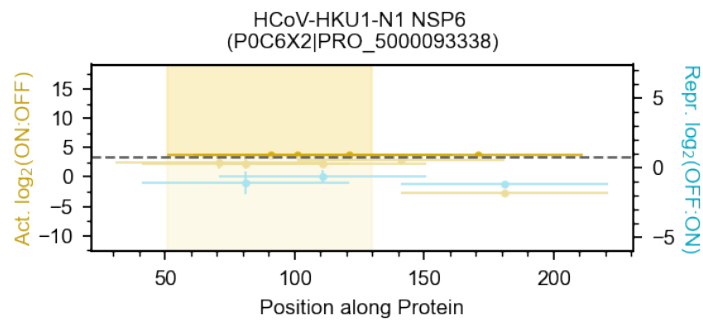

---

Extended activation domain from residues 51 to 140:

FVSFMMLLVKHKHFYLTMYIIPVLCTLFYVNYLVVYKEGFRGFTYVWLSYFVPAVNFTYVYEVFYGCILCVFAIFITMHSINHDIFSLMF

Max tile of activation domain from residues 51 to 130 (estimated 18.4% to 22.4% of cells activated):

FVSFMMLLVKHKHFYLTMYIIPVLCTLFYVNYLVVYKEGFRGFTYVWLSYFVPAVNFTYVYEVFYGCILCVFAIFITMHS

---

Other Tiling Screen Data from Ludwig, C.H. et al. 2023

HCoV-229E NSP9 (P0C6U2|PRO\_0000338191)

Gene: NSP9 ; Protein Family: NSP9

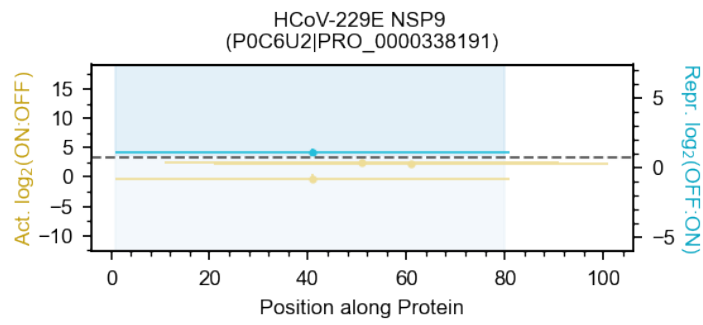

---

Extended repression domain from residues 1 to 80:

NNEIMPGKMKVKATKGE DGGITSEGNALYNNEG GRAFMAYAVTTKPGMKYVKWEHDSGVVTVELEPPCRFVIDTPTGPQ

Max tile of repression domain from residues 1 to 80 (estimated 19.6% to 24.7% of cells repressed):

NNEIMPGKMKVKATKGE DGGITSEGNALYNNEG GRAFMAYAVTTKPGMKYVKWEHDSGVVTVELEPPCRFVIDTPTGPQ

---



Other Tiling Screen Data from Ludwig, C.H. et al. 2023

HCoV-229E NSP9 (P0C6X1|PRO\_0000037301)

Gene: NSP9 ; Protein Family: NSP9

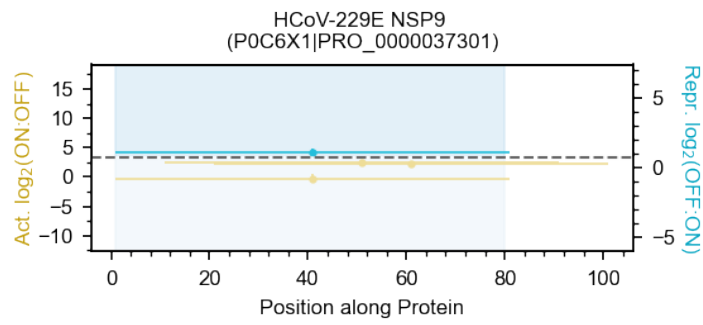

---

Extended repression domain from residues 1 to 80:

NNEIMPGKMKVKATKGEGDGGITSEGNALYNNEGGRAFMYAYVTTKPGMKYVKWEHDSGVVTVELEPPCRFVIDTPTGPQ

Max tile of repression domain from residues 1 to 80 (estimated 19.6% to 24.7% of cells repressed):

NNEIMPGKMKVKATKGEGDGGITSEGNALYNNEGGRAFMYAYVTTKPGMKYVKWEHDSGVVTVELEPPCRFVIDTPTGPQ

---

Other Tiling Screen Data from Ludwig, C.H. et al. 2023

HCoV-HKU1-N1 NSP9 (POC6U3|PRO\_0000338203)

Gene: NSP9 ; Protein Family: NSP9

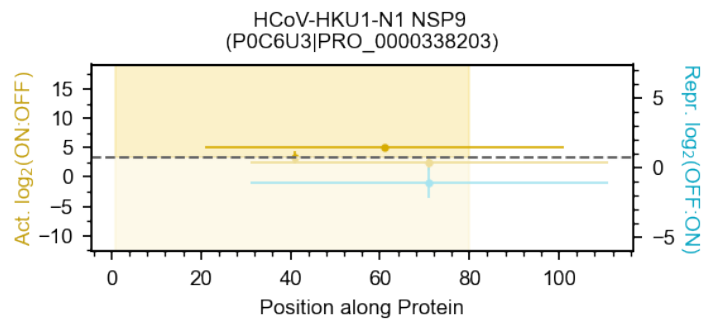

---

Extended activation domain from residues 1 to 80:

NNELMPHKLKIQVVNSGSDMNCNIPTQCYNNNGSSGRIVYAVLSDVDGLKYTKIMKDDGNCVVLELDPPCKFSIQDVKGL

Max tile of activation domain from residues 1 to 80 (estimated 7.3% to 29.1% of cells activated):

NNELMPHKLKIQVVNSGSDMNCNIPTQCYNNNGSSGRIVYAVLSDVDGLKYTKIMKDDGNCVVLELDPPCKFSIQDVKGL

---

Other Tiling Screen Data from Ludwig, C.H. et al. 2023

HCoV-HKU1-N1 NSP9 (P0C6X2|PRO\_5000093341)

Gene: NSP9 ; Protein Family: NSP9

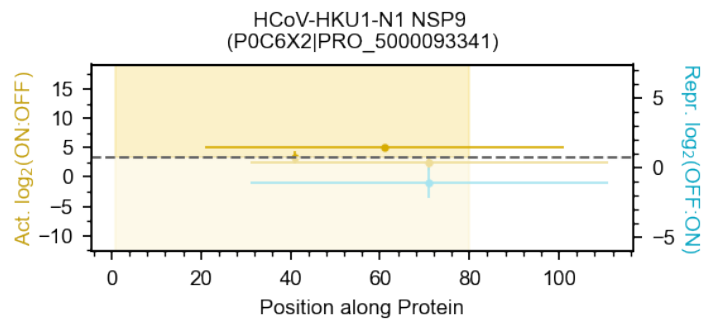

---

Extended activation domain from residues 1 to 80:

NNELMPHKLKIQVVNSGSDMNCNIPTQCYYNNGSSGRIVYAVLSDVDGLKYTKIMKDDGNCVVLELDPPCKFSIQDVKGL

Max tile of activation domain from residues 1 to 80 (estimated 7.3% to 29.1% of cells activated):

NNELMPHKLKIQVVNSGSDMNCNIPTQCYYNNGSSGRIVYAVLSDVDGLKYTKIMKDDGNCVVLELDPPCKFSIQDVKGL

---

Other Tiling Screen Data from Ludwig, C.H. et al. 2023

HCoV-OC43 NSP9 (P0C6U7|PRO\_0000338251)

Gene: NSP9 ; Protein Family: NSP9

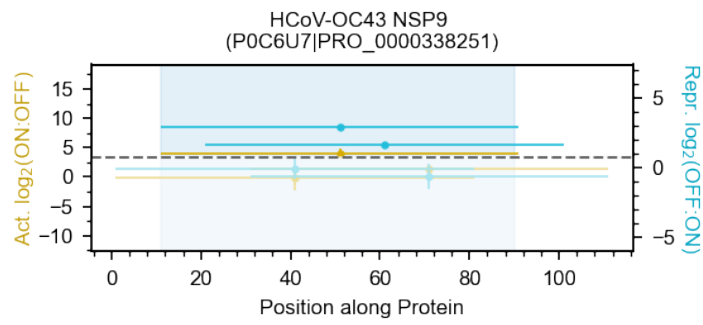

---

Extended repression domain from residues 11 to 100:

IQVVNSGPDQTCNTPTQCYNNSNNGKIVYAILSDVDGLKYTKILKDDGNFVLELDPPCKFTVQDAKGLKIKYLYFVKGCNTLARGWVV

Max tile of repression domain from residues 11 to 90 (estimated 62.3% to 70.7% of cells repressed):

IQVVNSGPDQTCNTPTQCYNNSNNGKIVYAILSDVDGLKYTKILKDDGNFVLELDPPCKFTVQDAKGLKIKYLYFVKG

---

Other Tiling Screen Data from Ludwig, C.H. et al. 2023

HCoV-OC43 NSP9 (P0C6X6|PRO\_0000283834)

Gene: NSP9 ; Protein Family: NSP9

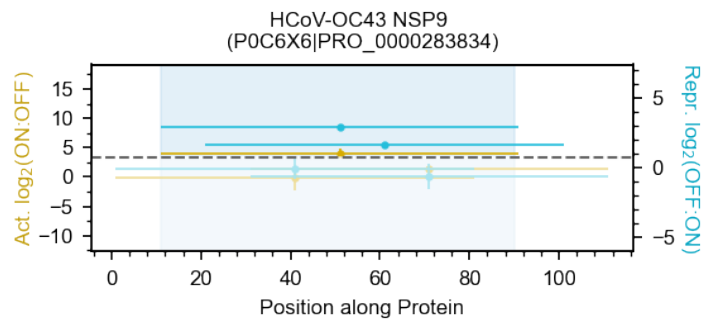

---

Extended repression domain from residues 11 to 100:

IQVVNSGPDQTCNTPTQCYNNSNNGKIVYAILSDVDGLKYTKILKDDGNFVLELDPPCKFTVQDAKGLKIKYLYFVKGCNTLARGWVV

Max tile of repression domain from residues 11 to 90 (estimated 62.3% to 70.7% of cells repressed):

IQVVNSGPDQTCNTPTQCYNNSNNGKIVYAILSDVDGLKYTKILKDDGNFVLELDPPCKFTVQDAKGLKIKYLYFVKG

---

Other Tiling Screen Data from Ludwig, C.H. et al. 2023

SARS-CoV ORF3a (P59632)

Gene: ORF3a ; Protein Family: ORF3a

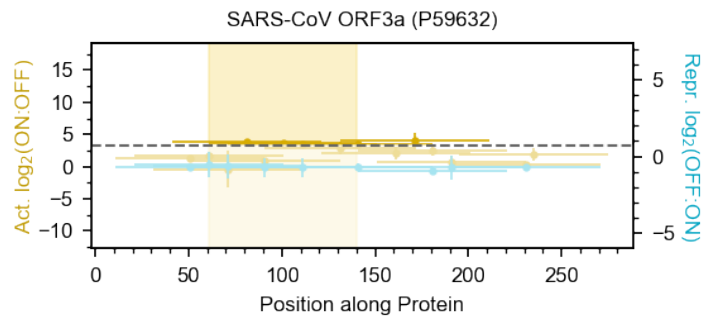

---

Extended activation domain from residues 61 to 150:

KIIALNKRWQLALYKGFQFICNLLLLFVTIYSHLLLVAAGMEAQFLYLYALIYFLQCINACRIIMRCWLCWKCKSKNPLLYDANYFVCWH

Max tile of activation domain from residues 61 to 140 (estimated 11.9% to 23.4% of cells activated):

KIIALNKRWQLALYKGFQFICNLLLLFVTIYSHLLLVAAGMEAQFLYLYALIYFLQCINACRIIMRCWLCWKCKSKNPLL

---

Other Tiling Screen Data from Ludwig, C.H. et al. 2023

SARS-CoV-2 ORF9b (P0DTD2)

Gene: ORF9b ; Protein Family: ORF9b

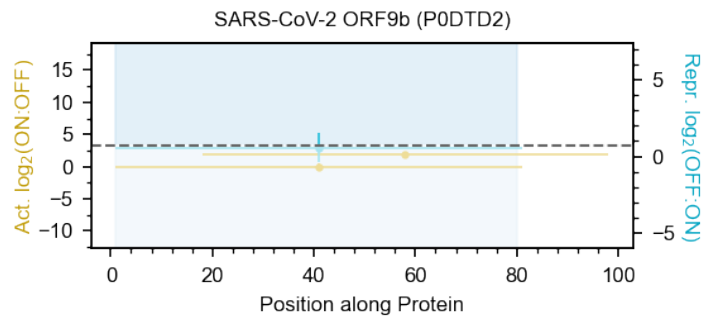

---

Extended repression domain from residues 1 to 80:

MDPKISEMHPALRLVDPQIQLAVTRMENAVGRDQNNVGPKVYPIILRLGSPLSLNMARKTLNSLEDKAFQLTPIAVQMTK

Max tile of repression domain from residues 1 to 80 (estimated 14.5% to 27.1% of cells repressed):

MDPKISEMHPALRLVDPQIQLAVTRMENAVGRDQNNVGPKVYPIILRLGSPLSLNMARKTLNSLEDKAFQLTPIAVQMTK

---

Other Tiling Screen Data from Ludwig, C.H. et al. 2023

SARS-CoV ORF9b (P59636)

Gene: ORF9b ; Protein Family: ORF9b

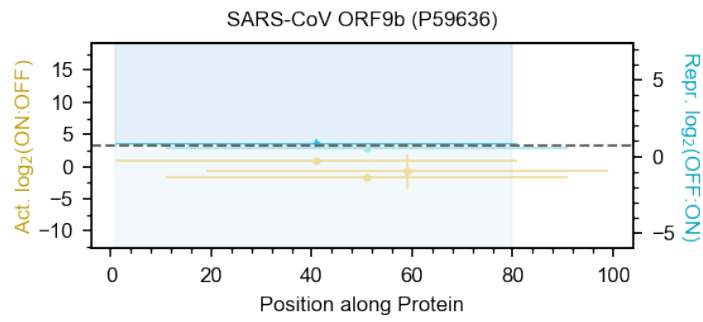

---

Extended repression domain from residues 1 to 90:

MDPNQTNVVPPALHLVDPQIQLTITRMEAMGQGQNSADPKVYPIILRLGSQLSLMARRNLDSLEARAFQSTPIVVQMTKLATTEELPD

Max tile of repression domain from residues 1 to 80 (estimated 17.3% to 21.5% of cells repressed):

MDPNQTNVVPPALHLVDPQIQLTITRMEAMGQGQNSADPKVYPIILRLGSQLSLMARRNLDSLEARAFQSTPIVVQMT

---



BtCoV-HKU3 Spike (Q3LZX1)

Gene: Spike ; Protein Family: Spike

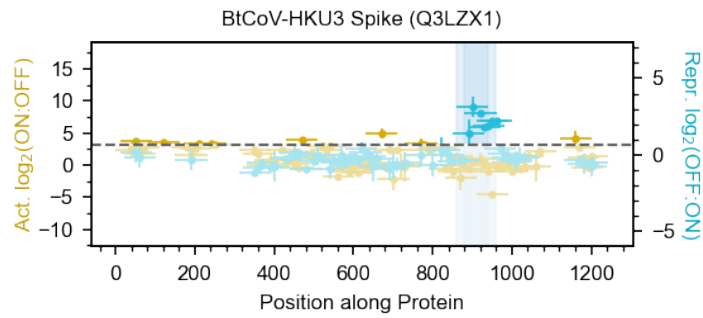

---

Extended repression domain from residues 851 to 940:

ATAGWTFGAGAALQIPFAMQMAYRFNGIGVTQNVLYENQKLIANQFNNSAIGKIQESLSSTASALGKLQDVVNQNAQALNTLVKQLSSNFG

Max tile of repression domain from residues 861 to 940 (estimated 53.9% to 88.6% of cells repressed):

AALQIPFAMQMAYRFNGIGVTQNVLYENQKLIANQFNNSAIGKIQESLSSTASALGKLQDVVNQNAQALNTLVKQLSSNFG

---

Extended repression domain from residues 881 to 1000:

TQNVLYENQKLIANQFNNSAIGKIQESLSSTASALGKLQDVVNQNAQALNTLVKQLSSNFGAISSVLNDILSRDKVEAEVQIDRLITGRLQSLQTYVTQQLIR  
AAEIRASANLAATKMSE

Max tile of repression domain from residues 881 to 960 (estimated 59.8% to 62.9% of cells repressed):

TQNVLYENQKLIANQFNNSAIGKIQESLSSTASALGKLQDVVNQNAQALNTLVKQLSSNFGAISSVLNDILSRDKVEAEV

---

Other Tiling Screen Data from Ludwig, C.H. et al. 2023

BtCoV-RaTG13 Spike (A0A6B9WHD3)

Gene: Spike ; Protein Family: Spike

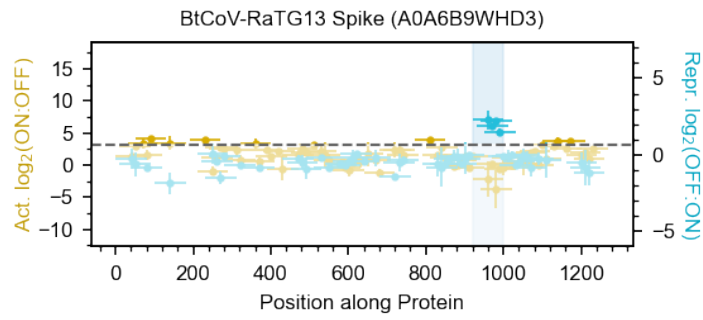

---

Extended repression domain from residues 921 to 1030:

NQFNSAIGKIQDLSSTASALGKLQDVVNQNAQALNTLVKQLSSNFGAISSVLNDILSRLDKVEAEVQIDRLITGRLQSLQTYVTQQLIRAAEIRASANLAAT  
KMSECVL

Max tile of repression domain from residues 921 to 1000 (estimated 30.2% to 68.0% of cells repressed):

NQFNSAIGKIQDLSSTASALGKLQDVVNQNAQALNTLVKQLSSNFGAISSVLNDILSRLDKVEAEVQIDRLITGRLQSL

---

Other Tiling Screen Data from Ludwig, C.H. et al. 2023

HCoV-229E Spike (P15423)

Gene: Spike ; Protein Family: Spike

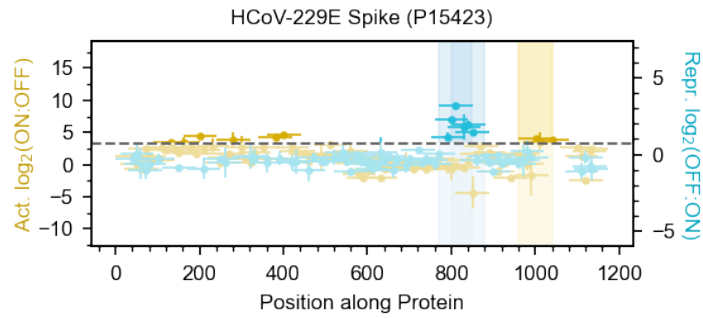

---

Extended activation domain from residues 961 to 1050:

EAWSGLCVDGTNGYVLRQPNLALYKEGNYYRITSRIMFEPRIPTMADFVQIENCNVTFVNISRSELQTIIVPEYIDVNKTLQELSYKLPNY

Max tile of activation domain from residues 961 to 1040 (estimated 23.1% to 24.6% of cells activated):

EAWSGLCVDGTNGYVLRQPNLALYKEGNYYRITSRIMFEPRIPTMADFVQIENCNVTFVNISRSELQTIIVPEYIDVNKTL

---

Extended repression domain from residues 751 to 850:

SLIGGIALGGLTSAVSIPFLAIQARLNLYVALQTDVLQENQKILAASFNKAMTNIVDAFTGVNDAITQTSQALQTVATALNKIQDVVNQGGNSLNHLTSQ

Max tile of repression domain from residues 771 to 850 (estimated 75.5% to 75.6% of cells repressed):

LAIQARLNLYVALQTDVLQENQKILAASFNKAMTNIVDAFTGVNDAITQTSQALQTVATALNKIQDVVNQGGNSLNHLTSQ

---

Extended repression domain from residues 791 to 890:

QKILAASFNKAMTNIVDAFTGVNDAITQTSQALQTVATALNKIQDVVNQGGNSLNHLTSQLRQNFQAISSSIQAIYDRLDTIQADQQVDRLITGRLAALN

Max tile of repression domain from residues 801 to 880 (estimated 29.7% to 44.4% of cells repressed):

AMTNIVDAFTGVNDAITQTSQALQTVATALNKIQDVVNQGGNSLNHLTSQLRQNFQAISSSIQAIYDRLDTIQADQQVDR

---

Other Tiling Screen Data from Ludwig, C.H. et al. 2023

HCoV-HKU1-N1 Spike (Q5MQD0)

Gene: Spike ; Protein Family: Spike

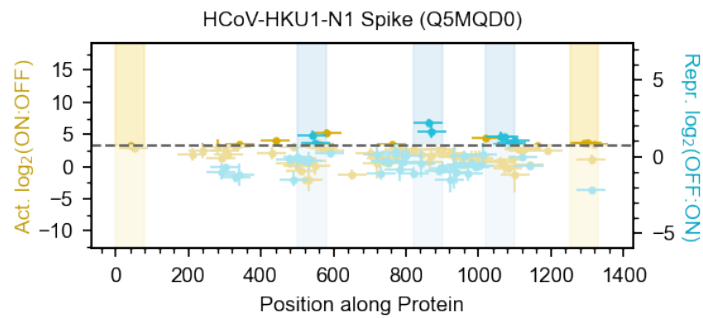

Extended activation domain from residues 1251 to 1340:

NLTLNLHTINATFLDLYEMNLIQESIKSLNNSYINLKDIGTYEMYVKWPWYVWLLISFSFIIFLVLLFFICCCTGCGSACFSKCHNCCD

Max tile of activation domain from residues 1251 to 1330 (estimated 17.2% to 19.5% of cells activated):

NLTLNLHTINATFLDLYEMNLIQESIKSLNNSYINLKDIGTYEMYVKWPWYVWLLISFSFIIFLVLLFFICCCTGCGSA

Extended activation domain from residues 1 to 80:

MLLIIFILPTTLAVIGDFNCTNFAINDLNTTVRISEYVVDVSYGLGTYIILDRVYLNTTILFTGYFPKSGANFRDLSLK

Max tile of activation domain from residues 1 to 80 (estimated 13.4% to 14.3% of cells activated):

MLLIIFILPTTLAVIGDFNCTNFAINDLNTTVRISEYVVDVSYGLGTYIILDRVYLNTTILFTGYFPKSGANFRDLSLK

Extended repression domain from residues 821 to 910:

FVCSNYAACHDLLSEYGTFCDNINSILDEVNGLDTTQLHVADTLMQGVTLSSNLNTNLHFDVDNINFKSLVGCLGPHCGSSRSFFEDL

Max tile of repression domain from residues 821 to 900 (estimated 39.0% to 50.5% of cells repressed):

FVCSNYAACHDLLSEYGTFCDNINSILDEVNGLDTTQLHVADTLMQGVTLSSNLNTNLHFDVDNINFKSLVGCLGPHCG

Extended repression domain from residues 501 to 590:

YRSCSTTVLDHTDWCRCSCLPDPITAYDPRSCSQKKSLSLVGVEHCAGFGVDEEKCGVLDGSYNVSCLCSTDAFLGWSYDTCVSNRCNI

Max tile of repression domain from residues 501 to 580 (estimated 21.6% to 30.5% of cells repressed):

YRSCSTTVLDHTDWCRCSCLPDPITAYDPRSCSQKKSLSLVGVEHCAGFGVDEEKCGVLDGSYNVSCLCSTDAFLGWSYD

Extended repression domain from residues 1021 to 1140:

NGFSATNSALAKIQSVVNSNAQALNSLLQQLFNKFGAISSSLQEILSRLEAQAQVQIDRLINGRLTALNAYVSQQLSDISLVKFGAALAMEKVNCEVKSQS  
PRINFCGNGNHILSLVQN

Max tile of repression domain from residues 1021 to 1100 (estimated 20.8% to 28.8% of cells repressed):

NGFSATNSALAKIQSVVNSNAQALNSLLQQLFNKFGAISSSLQEILSRLEAQAQVQIDRLINGRLTALNAYVSQQLSDI

HCoV-HKU1-N2 Spike (Q14EB0)

Gene: Spike ; Protein Family: Spike

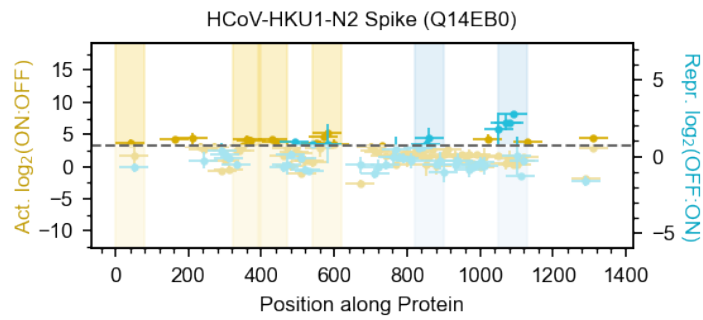

Extended activation domain from residues 531 to 620:

NTCPQKKVVVIGIEHCPGLGINEEKCQTQLNHSSCSCSPDAFLGWSFDSCISNNRCNIFSNFIFNGINS GTTCSNDLLYSNTEVSTGVCV

Max tile of activation domain from residues 541 to 620 (estimated 33.4% to 51.0% of cells activated):

GIGEHCPGLGINEEKCQTQLNHSSCSCSPDAFLGWSFDSCISNNRCNIFSNFIFNGINS GTTCSNDLLYSNTEVSTGVCV

Extended activation domain from residues 391 to 480:

FAIPNRRRDDQLGSSGFLQSSNYKIDISSSSCQLYSLPLVNVNTINNFNPSSWNRRYGFSGFNVSSYDVVYSDHCFVNSDFCPCADPS

Max tile of activation domain from residues 391 to 470 (estimated 20.9% to 31.9% of cells activated):

FAIPNRRRDDQLGSSGFLQSSNYKIDISSSSCQLYSLPLVNVNTINNFNPSSWNRRYGFSGFNVSSYDVVYSDHCFVSN

Extended activation domain from residues 311 to 410:

VKPVATVYRRIPNLPDCDIDNWLNNVSPSPLNWERRIFSNCFNLSTLLRLVHVDSFSCNLDKSKIFGSCFNSITVDKFAIPNRRRDDQLGSSGFLQ

Max tile of activation domain from residues 321 to 400 (estimated 15.5% to 35.9% of cells activated):

IPNLPDCDIDNWLNNVSPSPLNWERRIFSNCFNLSTLLRLVHVDSFSCNLDKSKIFGSCFNSITVDKFAIPNRRRDD

Extended activation domain from residues 1 to 80:

MFLIIFILPTTLAVIGDFNCTNSFINDYNKTIPRISEDDVDSLGLGTYVVLNRVYLNNTLLFTGYFPKSGANFRDLALK

Max tile of activation domain from residues 1 to 80 (estimated 12.7% to 26.9% of cells activated):

MFLIIFILPTTLAVIGDFNCTNSFINDYNKTIPRISEDDVDSLGLGTYVVLNRVYLNNTLLFTGYFPKSGANFRDLALK

Extended repression domain from residues 1031 to 1130:

SVVNANAQALNSLLQQLFNKFGAISSSLQEILSRLDNLEAQVQIDRLINGRLTALNAYVSQQLSDITLIKAGASRAIEKVNECVKSQSPRINFCGNGNHI

Max tile of repression domain from residues 1051 to 1130 (estimated 60.3% to 66.4% of cells repressed):

FGAISSSLQEILSRLDNLEAQVQIDRLINGRLTALNAYVSQQLSDITLIKAGASRAIEKVNECVKSQSPRINFCGNGNHI

Extended repression domain from residues 791 to 900:

PTNFTIAGHEEFIQTS SPKVTIDCSAFVCSNYAACHDLLSEYGTFCDNINSILNEVNDLLDITQLQVANALMQGVTLSSNLNTNLHSDVDNIDFKSLLGCLGS QCGSSSR

Max tile of repression domain from residues 821 to 900 (estimated 16.8% to 34.8% of cells repressed):

NYAACHDLLSEYGTFCDNINSILNEVNDLLDITQLQVANALMQGVTLSSNLNTNLHSDVDNIDFKSLLGCLGSQCGSSSR

HCoV-HKU1-N5 Spike (Q0ZME7)

Gene: Spike ; Protein Family: Spike

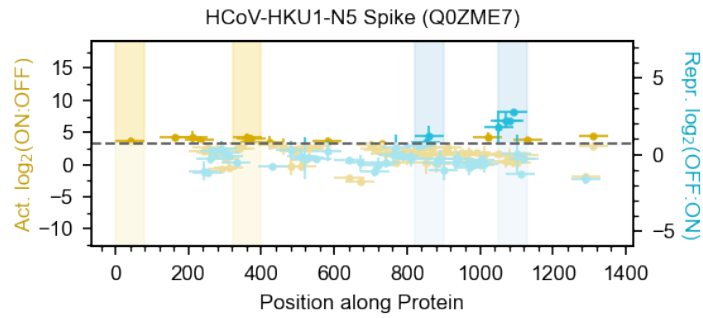

---

Extended activation domain from residues 311 to 410:

VKPVATVYRRIPNLPDCDIDNWLNNVSVPSPLNWERRIFSNCNFNLLSTLLRLVHVDSFSCNNLDKSKIFGSCFNSITVDKFAIPNRRRDDLQLGSSGFLQ

Max tile of activation domain from residues 321 to 400 (estimated 15.5% to 35.9% of cells activated):

IPNLPDCDIDNWLNNVSVPSPLNWERRIFSNCNFNLLSTLLRLVHVDSFSCNNLDKSKIFGSCFNSITVDKFAIPNRRRDD

---

Extended activation domain from residues 1 to 80:

MFLIIFILPTTLAVIGDFNCTNSFINDYNKTIPRISEVDVSVLGLGTYVYVLRVYLNNTLLFTGYFPKSGANFRDLALK

Max tile of activation domain from residues 1 to 80 (estimated 12.7% to 26.9% of cells activated):

MFLIIFILPTTLAVIGDFNCTNSFINDYNKTIPRISEVDVSVLGLGTYVYVLRVYLNNTLLFTGYFPKSGANFRDLALK

---

Extended repression domain from residues 1031 to 1130:

SVVNANAQALNSLLQQLFNKFGAISSSLQEILSRLDNLEAQVQIDRLINGRLTALNAYVSQQLSDITLIKAGASRAIEKVNECVKSQSPRINFCGNGNHI

Max tile of repression domain from residues 1051 to 1130 (estimated 60.3% to 66.4% of cells repressed):

FGAISSSLQEILSRLDNLEAQVQIDRLINGRLTALNAYVSQQLSDITLIKAGASRAIEKVNECVKSQSPRINFCGNGNHI

---

Extended repression domain from residues 791 to 900:

PTNFTIAGHEEFITSSPKVTIDCSAFVCSNYAACHDLLSEYGTFCDNINSILNEVNDLLDITQLQVANALMQGVTLSSNLNTNLHSDVDNIDFKSLLGCLGSQCGSSSR

Max tile of repression domain from residues 821 to 900 (estimated 16.8% to 34.8% of cells repressed):

NYAACHDLLSEYGTFCDNINSILNEVNDLLDITQLQVANALMQGVTLSSNLNTNLHSDVDNIDFKSLLGCLGSQCGSSSR

---

Other Tiling Screen Data from Ludwig, C.H. et al. 2023

HCoV-NL63 Spike (Q6Q1S2)

Gene: Spike ; Protein Family: Spike

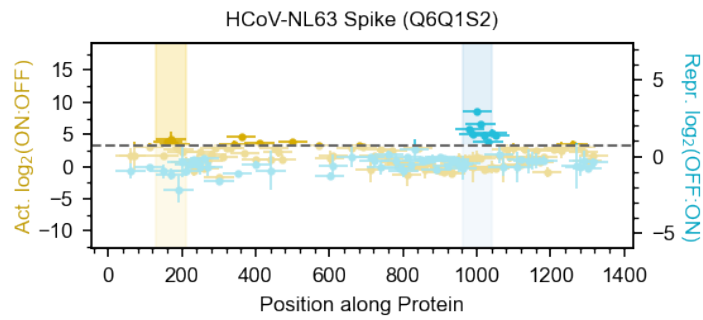

---

Extended activation domain from residues 121 to 220:

SSSFDCIVNLLFTEQLGAPLGITISGETVRLHLYNVTRTFYVPAAYKLTKLSVKCYFNYSVFSVFNATVTNVNVTTHNGRVVNYTVCCDCNGYTDNIFSV

Max tile of activation domain from residues 131 to 210 (estimated 12.1% to 44.1% of cells activated):

LFTEQLGAPLGITISGETVRLHLYNVTRTFYVPAAYKLTKLSVKCYFNYSVFSVFNATVTNVNVTTHNGRVVNYTVCCDC

---

Extended repression domain from residues 941 to 1090:

GLTSAAAIPFSLALQARLNVALQTDVLQENQKILAASFNKAINNIVASFSSVNDAITQTAEAIHTVTIALNKIQDVVNQGSALNHLTSQLRHNHFQAISNSIQ  
AIYDRLDSIQADQQVDRLITGRLAALNAFVSQVLNKYTEVRSRRL

Max tile of repression domain from residues 961 to 1040 (estimated 66.9% to 71.1% of cells repressed):

VALQTDVLQENQKILAASFNKAINNIVASFSSVNDAITQTAEAIHTVTIALNKIQDVVNQGSALNHLTSQLRHNHFQAIS

---





MERS-CoV Spike (K9N5Q8)

Gene: Spike ; Protein Family: Spike

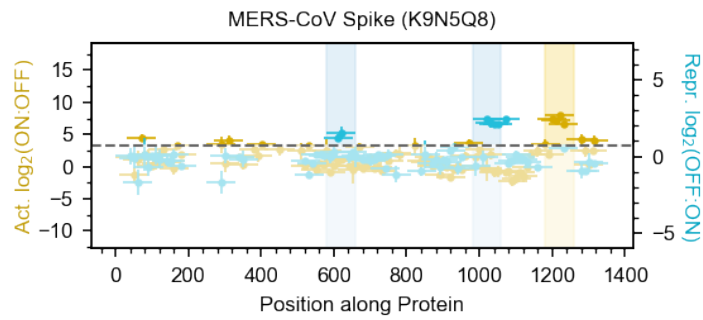

---

Extended activation domain from residues 1161 to 1270:

PTNCIAPVNGYFIKTNTRIVDEWSYTGSSFYAPEPITSLNTKYVAPQVTYQNISTNLPPLLGNSTGIDFQDELDEFFKNVSTSIPNFGSLTQINTLLDLTY  
EMLSLQ

Max tile of activation domain from residues 1181 to 1260 (estimated 81.3% to 85.0% of cells activated):

VDEWSYTGSSFYAPEPITSLNTKYVAPQVTYQNISTNLPPLLGNSTGIDFQDELDEFFKNVSTSIPNFGSLTQINTLL

---

Extended repression domain from residues 981 to 1090:

NGVGITQQVLSNQKLIANKFNQALGAMQTGFTTTNEAFHKVQDAVNNAQALSKLASELSNTFGAISASIGDIIQRLDVLEQDAQIDRLINGRLTTLNAFV  
AQLVRSE

Max tile of repression domain from residues 981 to 1060 (estimated 45.7% to 58.5% of cells repressed):

NGVGITQQVLSNQKLIANKFNQALGAMQTGFTTTNEAFHKVQDAVNNAQALSKLASELSNTFGAISASIGDIIQRLDV

---

Extended repression domain from residues 571 to 660:

FGITVQYGTDTNSVCPKLEFANDTKIASQLGNCVEYSLYGVSGRGVFQNCCTAVGVRQRFVYDAYQNLVGYYSDDGNYCLRACVSPVVS

Max tile of repression domain from residues 581 to 660 (estimated 22.1% to 37.2% of cells repressed):

TNSVCPKLEFANDTKIASQLGNCVEYSLYGVSGRGVFQNCCTAVGVRQRFVYDAYQNLVGYYSDDGNYCLRACVSPVVS

---

SARS-CoV-2 Spike (P0DTC2)

Gene: Spike ; Protein Family: Spike

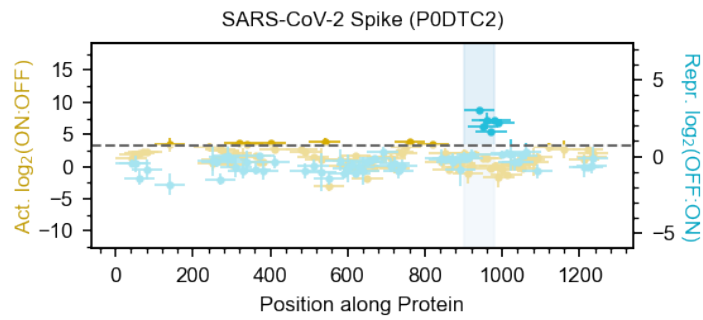

---

Extended repression domain from residues 901 to 1030:

QMAYRFNGIGVTQNVLYENQKLIANQFNSAIGKIQDLSSTASALGKLQDVVNQNAQALNTLVKQLSSNFGAISSVLNDILSRDKVEAEVQIDRLITGRLQ  
SLQTYVTQQLIRAAEIRASANLAATKMS

Max tile of repression domain from residues 901 to 980 (estimated 67.7% to 72.2% of cells repressed):

QMAYRFNGIGVTQNVLYENQKLIANQFNSAIGKIQDLSSTASALGKLQDVVNQNAQALNTLVKQLSSNFGAISSVLNDI

---

SARS-CoV Spike (P59594)

Gene: Spike ; Protein Family: Spike

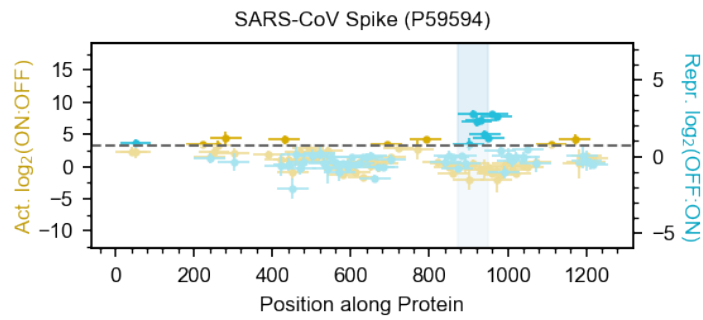

---

Extended repression domain from residues 861 to 1010:

SGTATAGWTFGAGAALQIPFAMQMAYRFNGIGVTQNVLYENQKQIANQFNKAISQIQESLTTTSTALGKLQDVVNQNAQALNTLVKQLSSNFGAISSVLN  
DILSRDKVEAEVQIDRLITGRLQSLQTYVTQQLIRAAEIRASANLAATK

Max tile of repression domain from residues 871 to 950 (estimated 55.9% to 71.0% of cells repressed):

GAGAALQIPFAMQMAYRFNGIGVTQNVLYENQKQIANQFNKAISQIQESLTTTSTALGKLQDVVNQNAQALNTLVKQLSS

---
